# Supplementary material for: Efficient synthesis of functionalized trifluoromethyl cyclopropanes via cyclopropanation of α-trifluoromethyl styrenes with chloroacetonitrile and ethyl chloroacetate
Source: Royal Society of Chemistry journal article supplement (doi:10.1039/d3nj02607h), 2023-01-01

# Supporting Information

## Efficient synthesis of functionalized trifluoromethyl cyclopropanes via cyclopropanation of $\alpha$ -trifluoromethyl styrenes with chloroacetonitrile and ethyl chloroacetate

Yupian Deng,<sup>a</sup> Ying Liu,<sup>a</sup> Jingjing He,<sup>a</sup> Pai Zheng,<sup>a</sup> Zhudi Sun,<sup>a</sup> and Song Cao<sup>\*a,b</sup>

<sup>a</sup>Shanghai Key Laboratory of Chemical Biology, School of Pharmacy, East China University of Science and Technology (ECUST), Shanghai 200237, China

<sup>b</sup>Key Laboratory of Organofluorine Chemistry, Shanghai Institute of Organic Chemistry, Chinese Academy of Sciences, Shanghai, 200032, China

\*Corresponding author. E-mail address: [scao@ecust.edu.cn](mailto:scao@ecust.edu.cn)

### Table of contents

|                                                                                                                                                            |      |
|------------------------------------------------------------------------------------------------------------------------------------------------------------|------|
| 1. General information .....                                                                                                                               | S2   |
| 2. $\alpha$ -(Trifluoromethyl)styrenes (1a–p) used in this reaction.....                                                                                   | S2   |
| 3. 2-Trifluoromethyl-1,3-conjugated enynes (1q–s) used in this reaction.....                                                                               | S2   |
| 4. Substrates 2a–f used in this reaction.....                                                                                                              | S3   |
| 5. General procedure for the synthesis of the target compounds 3aa–sa, 3ac, 3hc, 3nc.....                                                                  | S3   |
| 6. General procedure for the synthesis of the target compounds 3ad–af', 3qc–sc.....                                                                        | S3   |
| 7. <sup>1</sup> H- <sup>19</sup> F HOESY experiments.....                                                                                                  | S3   |
| 8. Analytical data of the target compounds.....                                                                                                            | S5   |
| 9. References.....                                                                                                                                         | S18  |
| 10. <sup>1</sup> H, <sup>13</sup> C, <sup>19</sup> F NMR and HRMS spectra of the target compounds.....                                                     | S19  |
| 11. GC-MS spectra of compounds <i>cis</i> -3ha, <i>cis</i> -3ia, <i>cis</i> -3ja, <i>cis</i> -3ka, <i>cis</i> -3la, <i>cis</i> -3oa and 3nc-isomer 2 ..... | S101 |

## 1. General information

All reagents were of analytical grade, and obtained from commercial suppliers and used without further purification. Melting points were measured in an open capillary using EZ-Melt automated melting point apparatus and were uncorrected.  $^1\text{H}$  NMR and  $^{13}\text{C}$  NMR spectra were recorded on a 400 spectrometer (400 MHz for  $^1\text{H}$  and 100 MHz for  $^{13}\text{C}$ , respectively) using TMS as an internal standard. The  $^{19}\text{F}$  NMR spectra were obtained on a 400 spectrometer (376 MHz) or 600 spectrometer (564 MHz) with  $\text{CF}_3\text{COOH}$  as an internal standard.  $\text{CDCl}_3$  was used as the NMR solvents. High resolution mass spectra (HRMS) were acquired in the EI or ESI mode using a TOF mass analyzer. The GC and GC-MS were recorded on HP 5973 MSD with 6890 GC. Silica gel (300–400 mesh size) was used for column chromatography. TLC analysis of reaction mixtures was performed using silica gel plates.

## 2. $\alpha$ -(Trifluoromethyl)styrenes (1a–p)

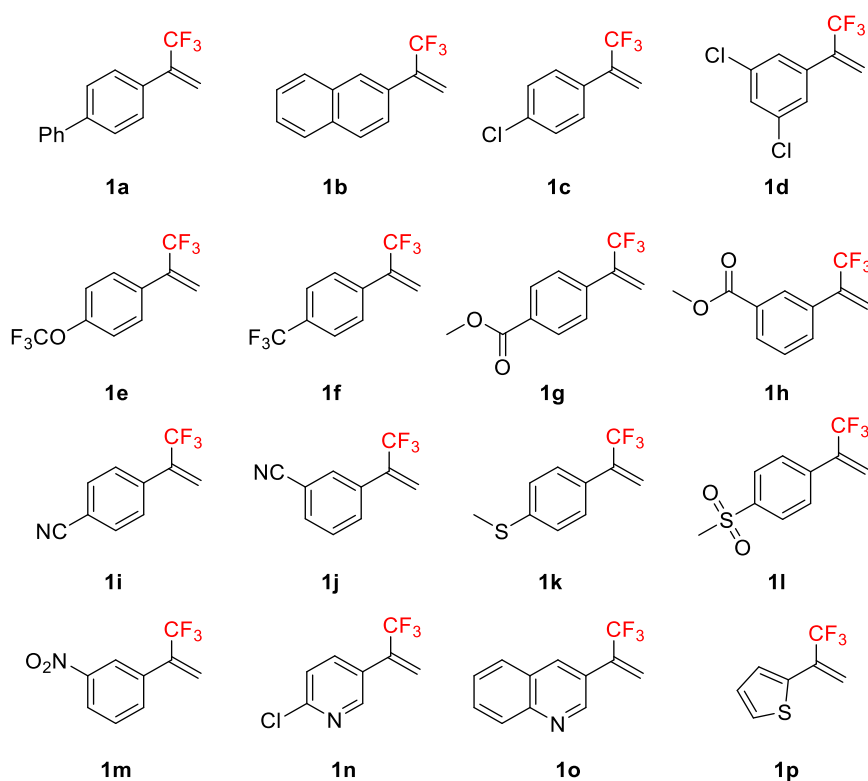

The  $\alpha$ -(trifluoromethyl)styrenes (1a–p) were prepared according to the reported procedure.<sup>1–5</sup>

## 3. 2-Trifluoromethyl-1,3-conjugated enynes (1q–s) used in this reaction

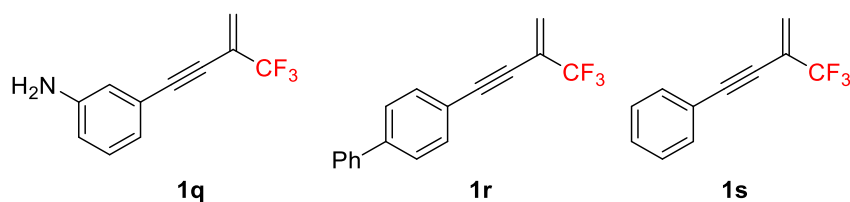

The enynes 1q–s were prepared according to the reported procedure.<sup>6</sup>

#### 4. Substrates 2a–f used in this reaction

The starting materials **2a–f** were obtained from commercial suppliers.

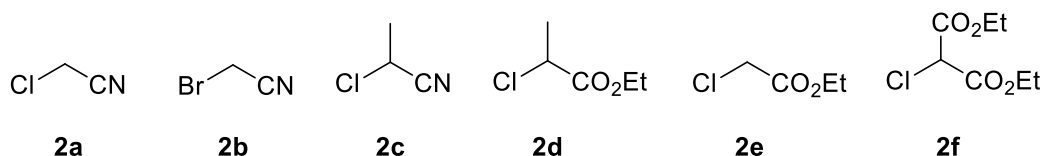

#### 5. General procedure for the synthesis of the target compounds **3aa–sa**, **3ac**, **3hc**, **3nc**

To a glass tube charged with a stirring bar were added NaOtBu (134.4 mg, 1.4 mmol, 2.0 equiv), ClCH<sub>2</sub>CN (**2a**) or 2-chloropropanenitrile (**2c**) (0.84 mmol, 1.2 equiv),  $\alpha$ -(trifluoromethyl)styrenes or 2-trifluoromethyl-1,3-conjugated enynes **1a–s** (0.7 mmol, 1.0 equiv), and DMF (3 mL) under argon atmosphere. The tube was flushed with argon three times and sealed with a septum. And then the reaction mixture was stirred at 60 °C for 12 h or 18 h (monitored by TLC and GC/MS). After completion of the reaction, the reaction mixture was quenched with saturated aqueous solution of NH<sub>4</sub>Cl (30 mL) and extracted with ethyl acetate (3  $\times$  10 mL). The organic layer was separated and dried over Na<sub>2</sub>SO<sub>4</sub>, filtered and concentrated in vacuo. The resultant residue was purified by column chromatography on silica gel using *n*-hexane/ ethyl acetate (20/1~2/1) as eluent to afford the pure target compounds **3aa–sa**, **3ac**, **3hc**, **3nc**.

#### 6. General procedure for the synthesis of the target compounds **3ad–af'**, **3qc–sc**

To a glass tube charged with a stirring bar were added LiHMDS (1.4 mL, 1.4 mmol, 2.0 equiv, 1 M in THF), **2d–f** (0.84 mmol, 1.2 equiv),  $\alpha$ -(trifluoromethyl)styrenes **1a**, **1b**, **1n** or 2-trifluoromethyl-1,3-conjugated enynes **1q–s** (0.7 mmol, 1.0 equiv), and DMF (3 mL) under argon atmosphere. The tube was flushed with argon three times and sealed with a rubber septum. And then the reaction mixture was stirred at 80 °C under argon atmosphere for 12 h or 18 h (monitored by TLC and GC/MS). After completion of the reaction, the reaction mixture was quenched with saturated aqueous solution of NH<sub>4</sub>Cl (30 mL) and extracted with ethyl acetate (3  $\times$  10 mL). The organic layer was separated and dried over Na<sub>2</sub>SO<sub>4</sub>, filtered and concentrated in vacuo. The resultant residue was purified by column chromatography on silica gel using *n*-hexane/ ethyl acetate (20/1~2/1) as eluent to afford the pure target compounds **3ad–af'**, **3qc–sc**.

#### 7. <sup>1</sup>H-<sup>19</sup>F HOESY experiments

The cyclopropanes *trans*-**3da** and *cis*-**3da** were analyzed to find their relative stereochemistry via <sup>1</sup>H-<sup>19</sup>F HOESY experiments. HOESY spectra were recorded by a Bruker AMX-400 spectrometer with a {<sup>19</sup>F, <sup>1</sup>H} probe. The spectra were recorded in CDCl<sub>3</sub> at 295.8 K. A spectral width of 90909.1 Hz in f<sub>2</sub> dimension (<sup>19</sup>F) and 5197.5 Hz in f<sub>1</sub> dimension (<sup>1</sup>H) were used. 8 scans were collected for each of the 8 increments, with a relaxation of 1.0 s. The analysis of <sup>1</sup>H-<sup>19</sup>F HOESY spectrum of *trans*-**3da** revealed that there are strong correlations between the CF<sub>3</sub> group

at  $-70.8$  ppm and two cyclopropane protons at 2.32 (Hc) and 1.97 (Ha) ppm, indicating that the  $\text{CF}_3$  group and two protons (Hc and Ha) lie on the same face of the cyclopropyl ring. Weak NOE was observed for the cyclopropane proton at 1.75 (Hb) ppm, suggesting that Hb proton lies on the face opposite to  $\text{CF}_3$  group.<sup>7</sup>

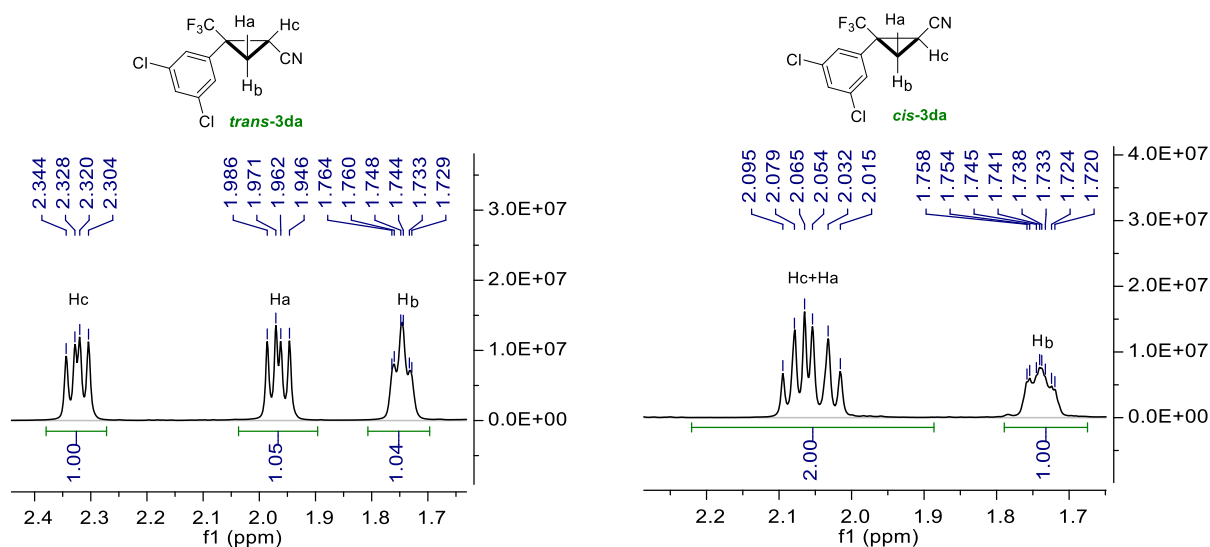

Figure S1. Part of  $^1\text{H}$  NMR spectra for *trans*-3da and *cis*-3da

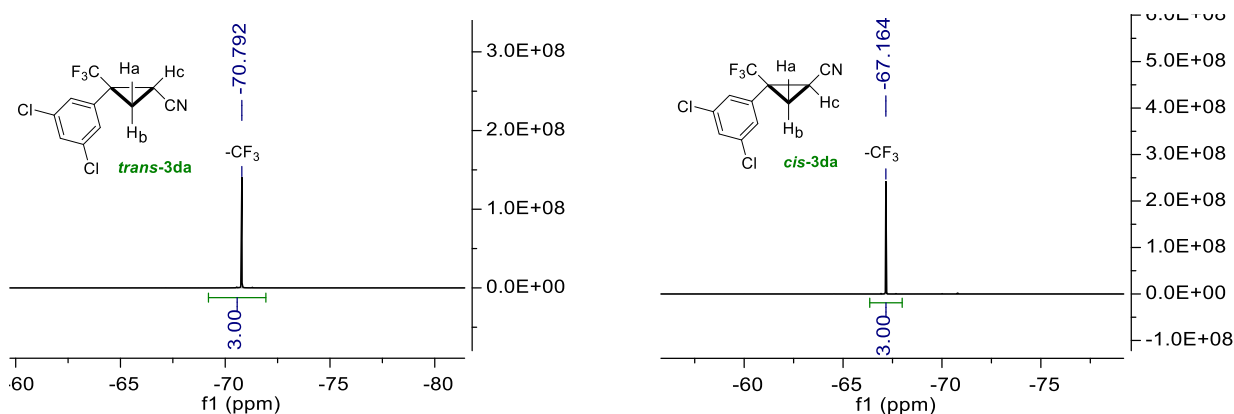

Figure S2.  $^{19}\text{F}$  NMR spectra for *trans*-3da and *cis*-3da

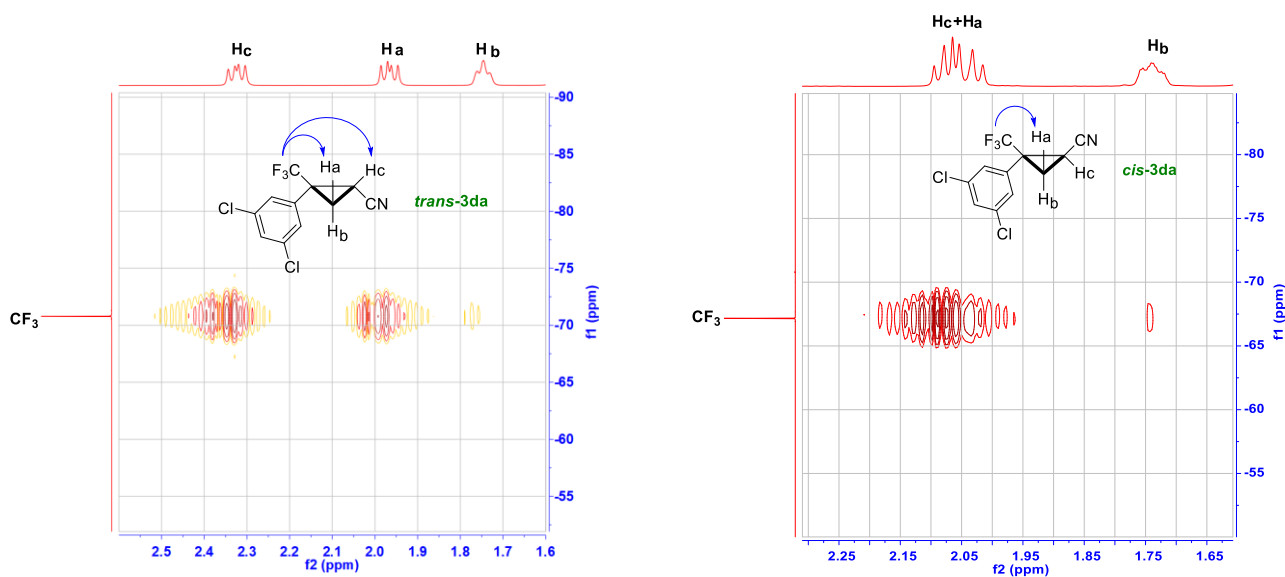

Figure S3.  $^1\text{H}$ - $^{19}\text{F}$  HOESY spectra for *trans*-3da and *cis*-3da

## 8. Analytical data of the target compounds

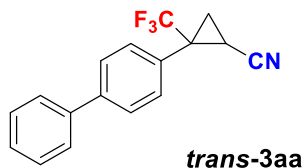

**trans-2-([1,1'-Biphenyl]-4-yl)-2-(trifluoromethyl)cyclopropane-1-carbonitrile (*trans*-3aa).** Yield 68% (136.6 mg), yellow solid, m.p.: 111.3–113.6 °C; <sup>1</sup>H NMR (400 MHz, CDCl<sub>3</sub>) δ 7.66–7.64 (m, 2H), 7.60–7.55 (m, 4H), 7.46–7.42 (m, 2H), 7.38–7.35 (m, 1H), 2.31 (dd, *J* = 9.6 Hz, 6.0 Hz, 1H), 1.95 (dd, *J* = 9.6 Hz, 6.0 Hz, 1H), 1.76 (td, *J* = 6.0 Hz, 2.0 Hz, 1H); <sup>13</sup>C NMR (100 MHz, CDCl<sub>3</sub>) δ 141.9, 139.1, 130.7, 127.9, 127.5, 127.4, 127.1, 126.8, 126.7, 126.2, 123.2 (q, <sup>1</sup>*J*<sub>CF</sub> = 273.6 Hz), 116.0, 33.5 (q, <sup>2</sup>*J*<sub>CF</sub> = 34.2 Hz), 15.2 (q, <sup>3</sup>*J*<sub>CF</sub> = 1.8 Hz), 7.3 (q, <sup>3</sup>*J*<sub>CF</sub> = 3.3 Hz); <sup>19</sup>F NMR (376 MHz, CDCl<sub>3</sub>) δ –71.0 (s, 3F); HRMS (EI): calcd for C<sub>17</sub>H<sub>12</sub>F<sub>3</sub>N [M]<sup>+</sup>: 287.0922, found: 287.0919.

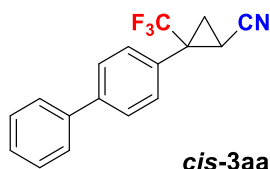

**cis-2-([1,1'-Biphenyl]-4-yl)-2-(trifluoromethyl)cyclopropane-1-carbonitrile (*cis*-3aa).** Yield 15% (30.1 mg), yellow solid, m.p.: 133.3–137.4 °C; <sup>1</sup>H NMR (400 MHz, CDCl<sub>3</sub>) δ 7.62–7.56 (m, 4H), 7.51–7.44 (m, 4H), 7.40–7.37 (m, 1H), 2.10–2.03 (m, 2H), 1.80–1.74 (m, 1H); <sup>13</sup>C NMR (100 MHz, CDCl<sub>3</sub>) δ 142.8, 140.0, 131.7, 131.0, 129.0, 128.0, 127.9, 127.7, 127.2, 124.1 (q, <sup>1</sup>*J*<sub>CF</sub> = 274.0 Hz), 116.6, 35.5 (q, <sup>2</sup>*J*<sub>CF</sub> = 35.9 Hz), 16.6 (q, <sup>3</sup>*J*<sub>CF</sub> = 2.1 Hz), 9.0 (q, <sup>3</sup>*J*<sub>CF</sub> = 1.1 Hz); <sup>19</sup>F NMR (376 MHz, CDCl<sub>3</sub>) δ –67.3 (s, 3F).

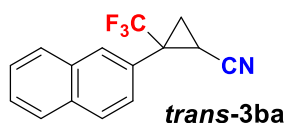

**trans-2-(Naphthalen-2-yl)-2-(trifluoromethyl)cyclopropane-1-carbonitrile (*trans*-3ba).** Yield 73% (133.4 mg), white solid, m.p.: 96.8–99.5 °C; <sup>1</sup>H NMR (400 MHz, CDCl<sub>3</sub>) δ 7.98 (s, 1H), 7.91–7.84 (m, 3H), 7.58–7.50 (m, 3H), 2.32 (dd, *J* = 9.6 Hz, 6.4 Hz, 1H), 1.96 (dd, *J* = 9.6 Hz, 6.0 Hz, 1H), 1.83 (td, *J* = 5.9 Hz, 1.1 Hz, 1H); <sup>13</sup>C NMR (100 MHz, CDCl<sub>3</sub>) δ 133.9, 133.1, 131.7, 129.0, 128.3, 127.9, 127.8, 127.4, 127.2, 126.8, 124.4 (q, <sup>1</sup>*J*<sub>CF</sub> = 273.7 Hz), 117.1, 35.0 (q, <sup>2</sup>*J*<sub>CF</sub> = 34.0 Hz), 16.4 (q, <sup>3</sup>*J*<sub>CF</sub> = 1.8 Hz), 8.5 (q, <sup>3</sup>*J*<sub>CF</sub> = 3.5 Hz); <sup>19</sup>F NMR (376 MHz, CDCl<sub>3</sub>) δ –70.8 (s, 3F); HRMS (EI): calcd for C<sub>15</sub>H<sub>10</sub>F<sub>3</sub>N [M]<sup>+</sup>: 261.0765, found: 261.0768.

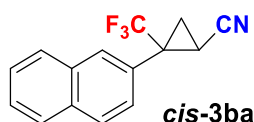

**cis-2-(Naphthalen-2-yl)-2-(trifluoromethyl)cyclopropane-1-carbonitrile (*cis*-3ba).** Yield 13% (23.8 mg), white solid, m.p.: 104.8–106.4 °C;  $^1\text{H}$  NMR (400 MHz,  $\text{CDCl}_3$ )  $\delta$  7.91–7.85 (m, 4H), 7.56–7.50 (m, 3H), 2.14–2.09 (m, 2H), 1.86–1.81 (m, 1H);  $^{13}\text{C}$  NMR (100 MHz,  $\text{CDCl}_3$ )  $\delta$  133.6, 132.9, 130.6, 130.1, 129.0, 128.1, 127.8, 127.4, 127.2, 127.1, 124.2 (q,  $^1J_{\text{CF}} = 274.1$  Hz), 116.7, 35.9 (q,  $^2J_{\text{CF}} = 34.3$  Hz), 16.7 (q,  $^3J_{\text{CF}} = 2.2$  Hz), 9.1 (d,  $^3J_{\text{CF}} = 0.9$  Hz);  $^{19}\text{F}$  NMR (376 MHz,  $\text{CDCl}_3$ )  $\delta$  -67.1 (s, 3F).

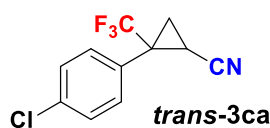

**trans-2-(4-Chlorophenyl)-2-(trifluoromethyl)cyclopropane-1-carbonitrile (*trans*-3ca).** Yield 68% (116.6 mg), yellow oil;  $^1\text{H}$  NMR (400 MHz,  $\text{CDCl}_3$ )  $\delta$  7.46–7.41 (m, 4H), 2.30 (dd,  $J = 8.8$  Hz, 6.4 Hz, 1H), 1.94 (dd,  $J = 8.8$  Hz, 6.4 Hz, 1H), 1.70 (t,  $J = 5.0$  Hz, 1H);  $^{13}\text{C}$  NMR (100 MHz,  $\text{CDCl}_3$ )  $\delta$  135.3, 131.7, 128.3, 127.3, 127.2, 122.9 (q,  $^1J_{\text{CF}} = 273.6$  Hz), 115.7, 33.2 (q,  $^2J_{\text{CF}} = 34.3$  Hz), 15.3 (q,  $^3J_{\text{CF}} = 1.9$  Hz), 7.4 (q,  $^3J_{\text{CF}} = 3.3$  Hz);  $^{19}\text{F}$  NMR (376 MHz,  $\text{CDCl}_3$ )  $\delta$  -71.2 (s, 3F); HRMS (EI): calcd for  $\text{C}_{11}\text{H}_7\text{ClF}_3\text{N}$   $[\text{M}]^+$ : 245.0219, found: 245.0218.

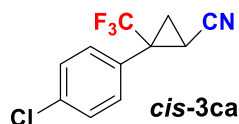

**cis-2-(4-Chlorophenyl)-2-(trifluoromethyl)cyclopropane-1-carbonitrile (*cis*-3ca).** Yield 18% (30.9 mg), yellow oil;  $^1\text{H}$  NMR (400 MHz,  $\text{CDCl}_3$ )  $\delta$  7.38 (s, 4H), 2.08–1.98 (m, 2H), 1.72–1.69 (m, 1H);  $^{13}\text{C}$  NMR (100 MHz,  $\text{CDCl}_3$ )  $\delta$  135.0, 130.9, 130.2, 128.9, 128.6, 128.3, 122.8 (q,  $^1J_{\text{CF}} = 274.0$  Hz), 115.2, 34.1 (q,  $^2J_{\text{CF}} = 34.1$  Hz), 15.5 (q,  $^3J_{\text{CF}} = 2.2$  Hz), 8.0 (d,  $^3J_{\text{CF}} = 1.9$  Hz);  $^{19}\text{F}$  NMR (376 MHz,  $\text{CDCl}_3$ )  $\delta$  -67.5 (s, 3F).

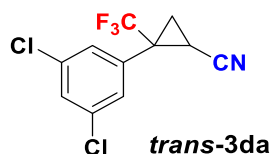

**trans-2-(3,4-Dichlorophenyl)-2-(trifluoromethyl)cyclopropane-1-carbonitrile (*trans*-3da).** Yield 60% (117.2 mg), yellow solid, m.p.: 83.8–84.5 °C;  $^1\text{H}$  NMR (400 MHz,  $\text{CDCl}_3$ )  $\delta$  7.47 (s, 1H), 7.40 (s, 2H), 2.32 (dd,  $J = 9.6$  Hz, 6.4 Hz, 1H), 1.97 (dd,  $J = 9.6$  Hz, 6.0 Hz, 1H), 1.75 (td,  $J = 6.2$  Hz, 1.6 Hz, 1H);  $^{13}\text{C}$  NMR (100 MHz,  $\text{CDCl}_3$ )  $\delta$  135.7, 132.8, 130.6, 130.0, 124.1 (q,  $^1J_{\text{CF}} = 273.9$  Hz), 116.3, 34.2 (q,  $^2J_{\text{CF}} = 34.6$  Hz), 16.2 (q,  $^3J_{\text{CF}} = 1.8$  Hz), 8.6 (q,  $^3J_{\text{CF}} = 3.1$  Hz);  $^{19}\text{F}$  NMR (376 MHz,  $\text{CDCl}_3$ )  $\delta$  -70.8 (s, 3F); HRMS (EI): calcd for  $\text{C}_{11}\text{H}_6\text{Cl}_2\text{F}_3\text{N}$   $[\text{M}]^+$ : 278.9829, found: 278.9826.

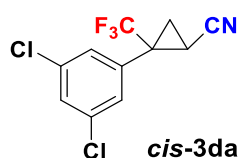

**cis-2-(3,4-Dichlorophenyl)-2-(trifluoromethyl)cyclopropane-1-carbonitrile (cis-3da).** Yield 20% (39.1 mg), yellow solid, m.p.: 125.2–126.5 °C; <sup>1</sup>H NMR (400 MHz, CDCl<sub>3</sub>) δ 7.42 (s, 1H), 7.34 (s, 2H), 2.10–2.02 (m, 2H), 1.76–1.72 (m, 1H); <sup>13</sup>C NMR (100 MHz, CDCl<sub>3</sub>) δ 134.6, 129.2, 128.9, 128.4, 128.1, 127.4, 122.5 (q, <sup>1</sup>J<sub>CF</sub> = 274.4 Hz), 114.7, 34.0 (q, <sup>2</sup>J<sub>CF</sub> = 34.5 Hz), 15.4 (q, <sup>3</sup>J<sub>CF</sub> = 2.0 Hz), 8.1 (q, <sup>3</sup>J<sub>CF</sub> = 1.2 Hz); <sup>19</sup>F NMR (376 MHz, CDCl<sub>3</sub>) δ –67.2 (s, 3F).

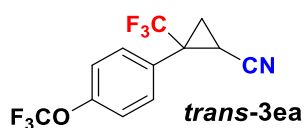

**trans-2-(4-(Trifluoromethoxy)phenyl)-2-(trifluoromethyl)cyclopropane-1-carbonitrile (trans-3ea).** Yield 78% (161.1 mg), yellow oil; <sup>1</sup>H NMR (400 MHz, CDCl<sub>3</sub>) δ 7.73 (d, *J* = 8.4 Hz, 2H), 7.65 (d, *J* = 8.0 Hz, 2H), 2.36 (dd, *J* = 9.6 Hz, 6.0 Hz, 1H), 2.02 (dd, *J* = 9.6 Hz, 6.0 Hz, 1H), 1.77 (t, *J* = 5.8 Hz, 1H); <sup>13</sup>C NMR (100 MHz, CDCl<sub>3</sub>) δ 150.1, 134.9, 132.3, 131.3, 126.6 (q, <sup>1</sup>J<sub>CF</sub> = 274.1 Hz), 121.6, 121.4, 120.4 (q, <sup>1</sup>J<sub>CF</sub> = 273.5 Hz), 116.2, 35.1 (q, <sup>2</sup>J<sub>CF</sub> = 34.5 Hz), 16.6 (q, <sup>3</sup>J<sub>CF</sub> = 2.2 Hz), 9.1 (d, <sup>3</sup>J<sub>CF</sub> = 1.0 Hz); <sup>19</sup>F NMR (376 MHz, CDCl<sub>3</sub>) δ –57.8 (s, 3F), –71.2 (s, 3F); HRMS (EI): calcd for C<sub>12</sub>H<sub>7</sub>F<sub>6</sub>NO [M]<sup>+</sup>: 295.0432, found: 295.0429.

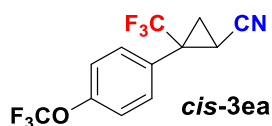

**cis-2-(4-(Trifluoromethoxy)phenyl)-2-(trifluoromethyl)cyclopropane-1-carbonitrile (cis-3ea).** Yield 13% (26.8 mg), yellow oil; <sup>1</sup>H NMR (400 MHz, CDCl<sub>3</sub>) δ 7.49 (d, *J* = 8.8 Hz, 2H), 7.25 (d, *J* = 9.2 Hz, 2H), 2.10–2.00 (m, 2H), 1.75–1.71 (m, 1H); <sup>13</sup>C NMR (100 MHz, CDCl<sub>3</sub>) δ 149.1, 131.3, 130.3, 122.8 (q, <sup>1</sup>J<sub>CF</sub> = 273.8 Hz), 120.6, 120.3, 119.7 (q, <sup>1</sup>J<sub>CF</sub> = 274.2 Hz), 118.0, 115.2, 34.0 (q, <sup>2</sup>J<sub>CF</sub> = 33.0 Hz), 15.5 (q, <sup>3</sup>J<sub>CF</sub> = 2.4 Hz), 8.0 (q, <sup>3</sup>J<sub>CF</sub> = 1.4 Hz); <sup>19</sup>F NMR (376 MHz, CDCl<sub>3</sub>) δ –57.9 (s, 3F), –67.5 (s, 3F).

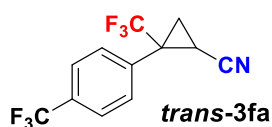

**trans-2-(Trifluoromethyl)-2-(4-(trifluoromethyl)phenyl)cyclopropane-1-carbonitrile (trans-3fa).** Yield 73% (142.6 mg), yellow oil; <sup>1</sup>H NMR (400 MHz, CDCl<sub>3</sub>) δ 7.73 (d, *J* = 8.4 Hz, 2H), 7.65 (d, *J* = 8.0 Hz, 2H), 2.34 (dd, *J* = 9.6 Hz, 6.4 Hz, 1H), 1.98 (dd, *J* = 9.6 Hz, 6.0 Hz, 1H), 1.75 (td, *J* = 6.2 Hz, 1.5 Hz, 1H); <sup>13</sup>C NMR (100 MHz, CDCl<sub>3</sub>) δ 132.9, 131.4 (q, <sup>2</sup>J<sub>CF</sub> = 32.6 Hz), 130.4, 125.2 (q, <sup>3</sup>J<sub>CF</sub> = 3.5 Hz), 123.1 (q, <sup>1</sup>J<sub>CF</sub> = 273.6 Hz), 122.9 (q, <sup>1</sup>J<sub>CF</sub>

= 270.7 Hz), 115.8, 33.7 (q,  $^2J_{CF}$  = 34.4 Hz), 15.4 (q,  $^3J_{CF}$  = 1.5 Hz), 7.5 (q,  $^3J_{CF}$  = 3.4 Hz);  $^{19}\text{F}$  NMR (376 MHz,  $\text{CDCl}_3$ )  $\delta$  -63.1 (s, 3F), -71.1 (s, 3F); HRMS (EI): calcd for  $\text{C}_{12}\text{H}_7\text{F}_6\text{N}$   $[\text{M}]^+$ : 279.0483, found: 279.0480.

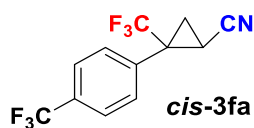

**cis-2-(Trifluoromethyl)-2-(4-(trifluoromethyl)phenyl)cyclopropane-1-carbonitrile (cis-3fa).** Yield 16% (31.2 mg), yellow oil;  $^1\text{H}$  NMR (400 MHz,  $\text{CDCl}_3$ )  $\delta$  7.68 (d,  $J$  = 8.0 Hz, 2H), 7.59 (d,  $J$  = 8.0 Hz, 2H), 2.11–2.05 (m, 2H), 1.78–1.74 (m, 1H);  $^{13}\text{C}$  NMR (100 MHz,  $\text{CDCl}_3$ )  $\delta$  135.5, 131.0 (q,  $^2J_{CF}$  = 32.7 Hz), 130.2, 125.0 (q,  $^3J_{CF}$  = 3.8 Hz), 122.7 (q,  $^1J_{CF}$  = 274.1 Hz), 122.5 (q,  $^1J_{CF}$  = 270.7 Hz), 115.1, 34.4 (q,  $^2J_{CF}$  = 34.2 Hz), 15.4 (q,  $^3J_{CF}$  = 2.1 Hz), 7.9 (q,  $^3J_{CF}$  = 1.5 Hz);  $^{19}\text{F}$  NMR (376 MHz,  $\text{CDCl}_3$ )  $\delta$  -63.0 (s, 3F), -67.3 (s, 3F).

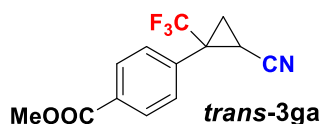

**trans-Methyl 4-(2-cyano-1-(trifluoromethyl)cyclopropyl)benzoate (trans-3ga).** Yield 67% (126.1 mg), yellow solid, m.p.: 109.5–112.7 °C;  $^1\text{H}$  NMR (400 MHz,  $\text{CDCl}_3$ )  $\delta$  8.12 (d,  $J$  = 8.4 Hz, 2H), 7.60 (d,  $J$  = 8.4 Hz, 2H), 3.93 (s, 3H), 2.34 (dd,  $J$  = 9.6 Hz, 6.4 Hz, 1H), 1.99 (dd,  $J$  = 9.6 Hz, 6.0 Hz, 1H), 1.77 (td,  $J$  = 6.1 Hz, 1.3 Hz, 1H);  $^{13}\text{C}$  NMR (100 MHz,  $\text{CDCl}_3$ )  $\delta$  165.2, 133.3, 130.7, 130.5, 129.2, 127.2, 122.9 (q,  $^1J_{CF}$  = 273.6 Hz), 115.6, 51.3, 33.6 (q,  $^2J_{CF}$  = 34.3 Hz), 15.2 (q,  $^3J_{CF}$  = 1.8 Hz), 7.4 (q,  $^3J_{CF}$  = 3.1 Hz);  $^{19}\text{F}$  NMR (376 MHz,  $\text{CDCl}_3$ )  $\delta$  -70.9 (s, 3F); HRMS (EI): calcd for  $\text{C}_{13}\text{H}_{10}\text{F}_3\text{NO}_2$   $[\text{M}]^+$ : 269.0664, found: 269.0667.

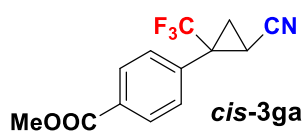

**cis-Methyl 4-(2-cyano-1-(trifluoromethyl)cyclopropyl)benzoate (cis-3ga).** Yield 15% (28.2 mg), yellow solid, m.p.: 129.7–132.8 °C;  $^1\text{H}$  NMR (400 MHz,  $\text{CDCl}_3$ )  $\delta$  8.06 (d,  $J$  = 8.4 Hz, 2H), 7.53 (d,  $J$  = 8.0 Hz, 2H), 3.93 (s, 3H), 2.11–2.02 (m, 2H), 1.78–1.74 (m, 1H);  $^{13}\text{C}$  NMR (100 MHz,  $\text{CDCl}_3$ )  $\delta$  165.1, 136.3, 130.5, 129.7, 129.1, 122.7 (q,  $^1J_{CF}$  = 274.0 Hz), 115.1, 51.4, 34.5 (q,  $^2J_{CF}$  = 33.9 Hz), 15.4 (q,  $^3J_{CF}$  = 2.1 Hz), 8.0 (q,  $^3J_{CF}$  = 1.6 Hz);  $^{19}\text{F}$  NMR (376 MHz,  $\text{CDCl}_3$ )  $\delta$  -67.2 (s, 3F).

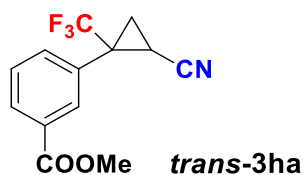

**trans-Methyl 3-(2-cyano-1-(trifluoromethyl)cyclopropyl)benzoate (trans-3ha).** Yield 64% (120.5 mg), yellow



solid, m.p.: 72.6–73.4 °C;  $^1\text{H}$  NMR (400 MHz,  $\text{CDCl}_3$ )  $\delta$  8.18 (s, 1H), 8.14 (d,  $J = 7.6$  Hz, 1H), 7.74 (d,  $J = 7.6$  Hz, 1H), 7.55 (t,  $J = 7.8$  Hz, 1H), 3.95 (s, 3H), 2.35 (dd,  $J = 9.6$  Hz, 6.0 Hz, 1H), 2.00 (dd,  $J = 9.6$  Hz, 6.0 Hz, 1H), 1.80 (td,  $J = 6.0$  Hz, 1.2 Hz, 1H);  $^{13}\text{C}$  NMR (100 MHz,  $\text{CDCl}_3$ )  $\delta$  166.2, 135.9, 132.6, 131.3, 130.3, 129.3, 128.7, 124.1 (q,  $^1J_{\text{CF}} = 273.6$  Hz), 116.8, 52.5, 34.6 (q,  $^2J_{\text{CF}} = 34.4$  Hz), 16.4 (q,  $^3J_{\text{CF}} = 1.4$  Hz), 8.5 (q,  $^3J_{\text{CF}} = 3.3$  Hz);  $^{19}\text{F}$  NMR (376 MHz,  $\text{CDCl}_3$ )  $\delta$  -71.0 (s, 3F); HRMS (ESI): calcd for  $\text{C}_{13}\text{H}_{10}\text{F}_3\text{NO}_2\text{Na}$   $[\text{M}+\text{Na}]^+$ : 292.0562, found: 292.0563.

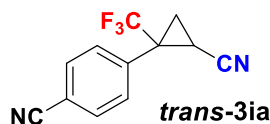

**trans-4-(2-Cyano-1-(trifluoromethyl)cyclopropyl)benzonitrile (trans-3ia).** Yield 72% (118.9 mg), white oil;  $^1\text{H}$  NMR (400 MHz,  $\text{CDCl}_3$ )  $\delta$  7.76 (d,  $J = 7.6$  Hz, 2H), 7.65 (d,  $J = 8.0$  Hz, 2H), 2.38 (dd,  $J = 9.6$  Hz, 6.0 Hz, 1H), 2.02 (dd,  $J = 9.2$  Hz, 6.0 Hz, 1H), 1.77 (t,  $J = 6.2$  Hz, 1H);  $^{13}\text{C}$  NMR (100 MHz,  $\text{CDCl}_3$ )  $\delta$  133.7, 131.8, 131.4, 122.7 (q,  $^1J_{\text{CF}} = 273.8$  Hz), 116.9, 115.4, 113.2, 33.6 (q,  $^2J_{\text{CF}} = 34.5$  Hz), 15.2 (q,  $^3J_{\text{CF}} = 1.9$  Hz), 7.5 (q,  $^3J_{\text{CF}} = 3.3$  Hz);  $^{19}\text{F}$  NMR (376 MHz,  $\text{CDCl}_3$ )  $\delta$  -70.7 (s, 3F); HRMS (EI): calcd for  $\text{C}_{12}\text{H}_7\text{F}_3\text{N}_2$   $[\text{M}]^+$ : 236.0561, found: 236.0559.

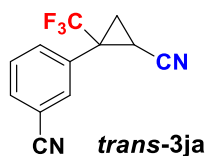

**trans-3-(2-Cyano-1-(trifluoromethyl)cyclopropyl)benzonitrile (trans-3ja).** Yield 75% (123.9 mg), white oil;  $^1\text{H}$  NMR (400 MHz,  $\text{CDCl}_3$ )  $\delta$  7.80–7.76 (m, 3H), 7.61 (t,  $J = 7.8$  Hz, 1H), 2.38 (dd,  $J = 9.6$  Hz, 6.4 Hz, 1H), 2.03 (dd,  $J = 9.6$  Hz, 6.4 Hz, 1H), 1.77 (td,  $J = 6.1$  Hz, 1.5 Hz, 1H);  $^{13}\text{C}$  NMR (100 MHz,  $\text{CDCl}_3$ )  $\delta$  135.9, 135.1, 133.7, 131.5, 130.1, 123.7 (q,  $^1J_{\text{CF}} = 273.8$  Hz), 117.8, 116.4, 133.7, 34.3 (q,  $^2J_{\text{CF}} = 34.6$  Hz), 16.2 (d,  $^3J_{\text{CF}} = 1.7$  Hz), 8.5 (d,  $^3J_{\text{CF}} = 3.1$  Hz);  $^{19}\text{F}$  NMR (376 MHz,  $\text{CDCl}_3$ )  $\delta$  -70.9 (s, 3F); HRMS (EI): calcd for  $\text{C}_{12}\text{H}_7\text{F}_3\text{N}_2$   $[\text{M}]^+$ : 236.0561, found: 236.0558.

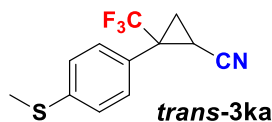

**trans-2-(4-(Methylthio)phenyl)-2-(trifluoromethyl)cyclopropane-1-carbonitrile (trans-3ka).** Yield 75% (134.9 mg), yellow oil;  $^1\text{H}$  NMR (400 MHz,  $\text{CDCl}_3$ )  $\delta$  7.40 (d,  $J = 7.6$  Hz, 2H), 7.28 (d,  $J = 6.8$  Hz, 2H), 2.47 (s, 3H), 2.27–2.20 (m, 1H), 1.90–1.83 (m, 1H), 1.67 (s, 1H);  $^{13}\text{C}$  NMR (100 MHz,  $\text{CDCl}_3$ )  $\delta$  140.4, 130.6, 127.2, 126.6, 125.1, 124.9, 123.1 (q,  $^1J_{\text{CF}} = 273.6$  Hz), 116.0, 33.2 (q,  $^2J_{\text{CF}} = 34.2$  Hz), 15.2 (q,  $^3J_{\text{CF}} = 1.8$  Hz), 14.1, 7.3 (q,  $^3J_{\text{CF}} = 3.2$  Hz);  $^{19}\text{F}$  NMR (376 MHz,  $\text{CDCl}_3$ )  $\delta$  -71.2 (s, 3F); HRMS (EI): calcd for  $\text{C}_{12}\text{H}_{10}\text{F}_3\text{NS}$   $[\text{M}]^+$ : 257.0486, found: 257.0483.

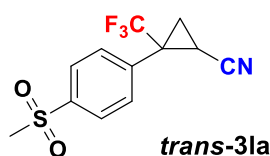

**trans-2-(4-(Methylsulfonyl)phenyl)-2-(trifluoromethyl)cyclopropane-1-carbonitrile (*trans*-3la).** Yield 76% (153.7 mg), yellow solid, m.p.: 132.8–133.8 °C; <sup>1</sup>H NMR (400 MHz, CDCl<sub>3</sub>) δ 8.05 (d, *J* = 8.4 Hz, 2H), 7.75 (d, *J* = 8.4 Hz, 2H), 3.09 (s, 3H), 2.40 (dd, *J* = 9.6 Hz, 6.4 Hz, 1H), 2.05 (dd, *J* = 9.6 Hz, 6.0 Hz, 1H), 1.79 (td, *J* = 6.0 Hz, 1.2 Hz, 1H); <sup>13</sup>C NMR (100 MHz, CDCl<sub>3</sub>) δ 142.3, 135.6, 132.7, 128.2, 126.6, 125.1, 123.7 (q, <sup>1</sup>*J*<sub>CF</sub> = 274.0 Hz), 116.5, 44.4, 34.6 (q, <sup>2</sup>*J*<sub>CF</sub> = 34.3 Hz), 16.4 (q, <sup>3</sup>*J*<sub>CF</sub> = 1.8 Hz), 8.5 (q, <sup>3</sup>*J*<sub>CF</sub> = 3.4 Hz); <sup>19</sup>F NMR (376 MHz, CDCl<sub>3</sub>) δ -70.7 (s, 3F); HRMS (EI): calcd for C<sub>12</sub>H<sub>10</sub>F<sub>3</sub>NO<sub>2</sub>S [M]<sup>+</sup>: 289.0384, found: 289.0381.

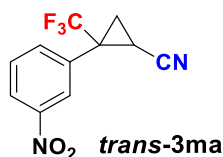

**trans-2-(3-Nitrophenyl)-2-(trifluoromethyl)cyclopropane-1-carbonitrile (*trans*-3ma).** Yield 67% (120.1 mg), white solid, m.p.: 68.3–70.6 °C; <sup>1</sup>H NMR (400 MHz, CDCl<sub>3</sub>) δ 8.40–8.33 (m, 2H), 7.90 (d, *J* = 7.6 Hz, 1H), 7.68 (t, *J* = 8.0 Hz, 1H), 2.43 (dd, *J* = 9.6 Hz, 6.0 Hz, 1H), 2.07 (dd, *J* = 9.6 Hz, 6.4 Hz, 1H), 1.85 (td, *J* = 6.2 Hz, 1.6 Hz, 1H); <sup>13</sup>C NMR (125 MHz, CDCl<sub>3</sub>) δ 147.5, 136.5, 130.8, 129.3, 125.5, 124.1, 122.7 (q, <sup>1</sup>*J*<sub>CF</sub> = 273.9 Hz), 115.4, 33.3 (q, <sup>2</sup>*J*<sub>CF</sub> = 34.8 Hz), 15.3, 7.6 (q, <sup>3</sup>*J*<sub>CF</sub> = 3.2 Hz); <sup>19</sup>F NMR (376 MHz, CDCl<sub>3</sub>) δ -70.8 (s, 3F); HRMS (EI): calcd for C<sub>11</sub>H<sub>7</sub>F<sub>3</sub>N<sub>2</sub>O<sub>2</sub> [M]<sup>+</sup>: 256.0460, found: 256.0458.

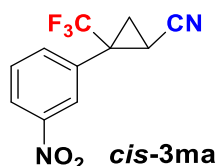

**cis-2-(3-Nitrophenyl)-2-(trifluoromethyl)cyclopropane-1-carbonitrile (*cis*-3ma).** Yield 24% (43.0 mg), white solid, m.p.: 108.3–110.2 °C; <sup>1</sup>H NMR (400 MHz, CDCl<sub>3</sub>) δ 8.24–8.21 (m, 2H), 7.76 (d, *J* = 7.6 Hz, 1H), 7.57 (t, *J* = 7.8 Hz, 1H), 2.12–2.03 (m, 2H), 1.78–1.74 (m, 1H); <sup>13</sup>C NMR (125 MHz, CDCl<sub>3</sub>) δ 147.3, 135.7, 133.6, 129.3, 124.7, 123.8, 122.6 (q, <sup>1</sup>*J*<sub>CF</sub> = 274.4 Hz), 114.7, 34.1 (q, <sup>2</sup>*J*<sub>CF</sub> = 34.2 Hz), 15.5, 8.2; <sup>19</sup>F NMR (376 MHz, CDCl<sub>3</sub>) δ -67.2 (s, 3F).

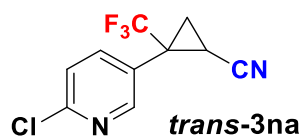

**trans-2-(6-Chloropyridin-3-yl)-2-(trifluoromethyl)cyclopropane-1-carbonitrile (*trans*-3na).** Yield 68% (117.1 mg), yellow oil; <sup>1</sup>H NMR (400 MHz, CDCl<sub>3</sub>) δ 8.52 (d, *J* = 2.4 Hz, 1H), 7.83 (dd, *J* = 8.4 Hz, 2.4 Hz, 1H), 7.46 (d,

$J = 8.4$  Hz, 1H), 2.39 (dd,  $J = 9.6$  Hz, 6.0 Hz, 1H), 2.03 (dd,  $J = 9.6$  Hz, 6.0 Hz, 1H), 1.78 (td,  $J = 6.2$  Hz, 0.8 Hz, 1H);  $^{13}\text{C}$  NMR (100 MHz,  $\text{CDCl}_3$ )  $\delta$  153.4, 152.3, 141.7, 125.1, 124.8, 123.6 (q,  $^1J_{\text{CF}} = 273.7$  Hz), 116.3, 32.1 (q,  $^2J_{\text{CF}} = 35.0$  Hz), 16.0 (q,  $^3J_{\text{CF}} = 1.8$  Hz), 8.2 (q,  $^3J_{\text{CF}} = 3.1$  Hz);  $^{19}\text{F}$  NMR (376 MHz,  $\text{CDCl}_3$ )  $\delta$  -71.0 (s, 3F); HRMS (EI): calcd for  $\text{C}_{10}\text{H}_6\text{ClF}_3\text{N}_2$   $[\text{M}]^+$ : 246.0172, found: 246.0170.

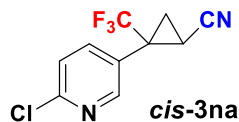

**cis-2-(6-Chloropyridin-3-yl)-2-(trifluoromethyl)cyclopropane-1-carbonitrile (cis-3na).** Yield 17% (29.3 mg), yellow oil;  $^1\text{H}$  NMR (400 MHz,  $\text{CDCl}_3$ )  $\delta$  8.46 (d,  $J = 2.0$  Hz, 1H), 7.76 (dd,  $J = 8.4$  Hz, 2.4 Hz, 1H), 7.40 (d,  $J = 8.4$  Hz, 1H), 2.16–2.04 (m, 2H), 1.79–1.75 (m, 1H);  $^{13}\text{C}$  NMR (100 MHz,  $\text{CDCl}_3$ )  $\delta$  153.2, 151.6, 141.0, 127.9, 124.8, 123.6 (q,  $^1J_{\text{CF}} = 274.2$  Hz), 115.8, 33.0 (q,  $^2J_{\text{CF}} = 34.8$  Hz), 16.2 (q,  $^3J_{\text{CF}} = 1.8$  Hz), 9.0;  $^{19}\text{F}$  NMR (376 MHz,  $\text{CDCl}_3$ )  $\delta$  -67.4 (s, 3F).

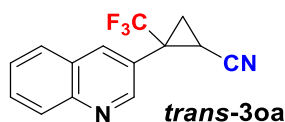

**trans-2-(Quinolin-3-yl)-2-(trifluoromethyl)cyclopropane-1-carbonitrile (trans-3oa).** Yield 65% (119.2 mg), yellow solid, m.p.: 84.4–85.3 °C;  $^1\text{H}$  NMR (400 MHz,  $\text{CDCl}_3$ )  $\delta$  9.00 (s, 1H), 8.36 (s, 1H), 8.17 (d,  $J = 8.8$  Hz, 1H), 7.90 (d,  $J = 8.4$  Hz, 1H), 7.81 (t,  $J = 7.6$  Hz, 1H), 7.63 (t,  $J = 7.4$  Hz, 1H), 2.44 (dd,  $J = 9.6$  Hz, 6.0 Hz, 1H), 2.09 (dd,  $J = 9.2$  Hz, 6.0 Hz, 1H), 1.88 (td,  $J = 6.2$  Hz, 1.2 Hz, 1H);  $^{13}\text{C}$  NMR (100 MHz,  $\text{CDCl}_3$ )  $\delta$  150.6, 147.4, 138.7, 130.0, 128.4, 127.1, 126.6, 126.2, 122.9 (q,  $^1J_{\text{CF}} = 273.8$  Hz), 121.9, 115.5, 31.7 (q,  $^2J_{\text{CF}} = 34.8$  Hz), 15.0 (q,  $^3J_{\text{CF}} = 1.6$  Hz), 7.2 (q,  $^3J_{\text{CF}} = 3.0$  Hz);  $^{19}\text{F}$  NMR (376 MHz,  $\text{CDCl}_3$ )  $\delta$  -70.8 (s, 3F); HRMS (ESI): calcd for  $\text{C}_{14}\text{H}_{10}\text{F}_3\text{N}_2$   $[\text{M}+\text{H}]^+$ : 263.0796, found: 263.0794.

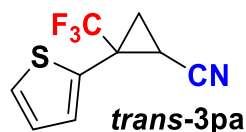

**trans-2-(Thiophen-2-yl)-2-(trifluoromethyl)cyclopropane-1-carbonitrile (trans-3pa).** Yield 58% (88.5 mg), yellow oil;  $^1\text{H}$  NMR (400 MHz,  $\text{CDCl}_3$ )  $\delta$  7.41 (d,  $J = 4.4$  Hz, 1H), 7.28 (s, 1H), 7.06 (t,  $J = 4.0$  Hz, 1H), 2.33 (dd,  $J = 8.8$  Hz, 6.4 Hz, 1H), 1.97 (dd,  $J = 8.8$  Hz, 6.8 Hz, 1H), 1.88 (t,  $J = 6.6$  Hz, 1H);  $^{13}\text{C}$  NMR (100 MHz,  $\text{CDCl}_3$ )  $\delta$  130.5, 130.3, 127.2, 126.4, 122.6 (q,  $^1J_{\text{CF}} = 273.6$  Hz), 115.5, 28.9 (q,  $^2J_{\text{CF}} = 35.8$  Hz), 16.6 (q,  $^3J_{\text{CF}} = 1.9$  Hz), 9.4 (q,  $^3J_{\text{CF}} = 3.0$  Hz);  $^{19}\text{F}$  NMR (376 MHz,  $\text{CDCl}_3$ )  $\delta$  -71.2 (s, 3F); HRMS (ESI): calcd for  $\text{C}_9\text{H}_7\text{F}_3\text{NS}$   $[\text{M}+\text{H}]^+$ : 218.0251, found: 218.0247.

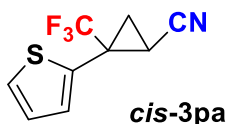

**cis-2-(Thiophen-2-yl)-2-(trifluoromethyl)cyclopropane-1-carbonitrile (cis-3pa).** Yield 19% (29.0 mg), yellow oil;  $^1\text{H}$  NMR (400 MHz,  $\text{CDCl}_3$ )  $\delta$  7.35 (d,  $J = 4.8$  Hz, 1H), 7.18 (d,  $J = 3.2$  Hz, 1H), 7.00 (t,  $J = 4.4$  Hz, 1H), 2.14–2.08 (m, 2H), 1.88–1.82 (m, 1H);  $^{13}\text{C}$  NMR (100 MHz,  $\text{CDCl}_3$ )  $\delta$  134.9, 130.2, 127.6, 127.2, 123.5 (q,  $^1J_{\text{CF}} = 274.1$  Hz), 115.9, 30.7 (q,  $^2J_{\text{CF}} = 35.6$  Hz), 18.1 (q,  $^3J_{\text{CF}} = 2.2$  Hz), 11.0;  $^{19}\text{F}$  NMR (376 MHz,  $\text{CDCl}_3$ )  $\delta$  -67.5 (s, 3F).

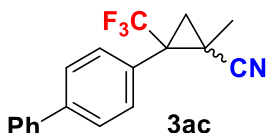

**2-([1,1'-Biphenyl]-4-yl)-1-methyl-2-(trifluoromethyl)cyclopropane-1-carbonitrile (3ac, *trans/cis*=1/1).** Yield 79% (166.5 mg), yellow solid, m.p.: 97.3–100.6 °C;  $^1\text{H}$  NMR (400 MHz,  $\text{CDCl}_3$ )  $\delta$  7.64–7.58 (m, 4.21H), 7.48–7.44 (m, 3.14H), 7.40–7.36 (m, 2.10H), 2.20 (d,  $J = 6.0$  Hz, 1H), 2.04 (s, 0.05H), 1.84 (d,  $J = 1.6$  Hz, 0.07H), 1.54–1.51 (m, 1H), 1.24 (s, 0.16H), 1.22 (s, 3H);  $^{13}\text{C}$  NMR (100 MHz,  $\text{CDCl}_3$ )  $\delta$  141.4, 138.9, 130.3, 130.0, 128.0, 127.9, 127.8, 127.1, 126.7, 126.6, 126.2, 126.1, 123.3 (q,  $^1J_{\text{CF}} = 274.3$  Hz), 118.8, 38.0 (q,  $^2J_{\text{CF}} = 32.9$  Hz), 21.5 (q,  $^3J_{\text{CF}} = 2.6$  Hz), 19.0, 12.8;  $^{19}\text{F}$  NMR (376 MHz,  $\text{CDCl}_3$ )  $\delta$  -62.0 (s, 0.15F), -65.9 (s, 3F); HRMS (ESI): calcd for  $\text{C}_{18}\text{H}_{14}\text{F}_3\text{NNa}$  [ $\text{M}+\text{Na}$ ] $^+$ : 324.0976, found: 324.0977.

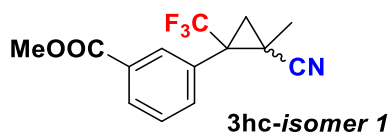

**Methyl 3-(2-cyano-2-methyl-1-(trifluoromethyl)cyclopropyl)benzoate (3hc-isomer 1).** Yield 40% (79.2mg), yellow solid, m.p.: 117.4–121.6 °C;  $^1\text{H}$  NMR (400 MHz,  $\text{CDCl}_3$ )  $\delta$  8.10 (d,  $J = 7.6$  Hz, 2H), 7.69 (s, 1H), 7.53 (t,  $J = 7.8$  Hz, 1H), 3.94 (s, 3H), 2.02 (dd,  $J = 6.4$  Hz, 1.6 Hz, 1H), 1.86 (d,  $J = 6.4$  Hz, 1H), 1.79 (s, 3H);  $^{13}\text{C}$  NMR (100 MHz,  $\text{CDCl}_3$ )  $\delta$  165.2, 134.1, 131.8, 130.8, 130.0, 129.8, 128.1, 123.5 (q,  $^1J_{\text{CF}} = 274.3$  Hz), 119.0, 51.3, 37.1 (q,  $^2J_{\text{CF}} = 33.4$  Hz), 22.0 (q,  $^3J_{\text{CF}} = 2.0$  Hz), 16.6, 15.5 (q,  $^3J_{\text{CF}} = 2.3$  Hz);  $^{19}\text{F}$  NMR (376 MHz,  $\text{CDCl}_3$ )  $\delta$  -62.0 (s, 3F); HRMS (ESI): calcd for  $\text{C}_{14}\text{H}_{12}\text{F}_3\text{NO}_2\text{Na}$  [ $\text{M}+\text{Na}$ ] $^+$ : 306.0718, found: 306.0721.

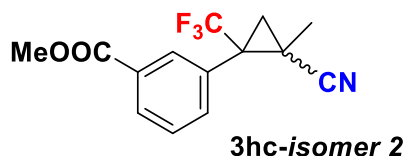

**Methyl 3-(2-cyano-2-methyl-1-(trifluoromethyl)cyclopropyl)benzoate (3hc-isomer 2).** Yield 40% (79.2 mg), yellow oil;  $^1\text{H}$  NMR (400 MHz,  $\text{CDCl}_3$ )  $\delta$  8.11 (d,  $J = 7.2$  Hz, 2H), 7.53 (t,  $J = 7.6$  Hz, 2H), 3.95 (s, 3H), 2.23 (d,  $J = 6.0$  Hz, 1H), 1.56 (s, 1H), 1.17 (s, 3H);  $^{13}\text{C}$  NMR (100 MHz,  $\text{CDCl}_3$ )  $\delta$  165.1, 134.3, 130.9, 130.1, 129.7, 129.5,

128.2, 123.1 (q,  $^1J_{\text{CF}} = 274.3$  Hz), 118.5, 51.4, 37.9 (q,  $^2J_{\text{CF}} = 33.1$  Hz), 21.5 (q,  $^3J_{\text{CF}} = 2.2$  Hz), 19.0, 12.8;  $^{19}\text{F}$  NMR (376 MHz,  $\text{CDCl}_3$ )  $\delta$  -65.9 (s, 3F).

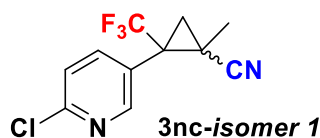

**2-(6-Chloropyridin-3-yl)-1-methyl-2-(trifluoromethyl)cyclopropane-1-carbonitrile (3nc-isomer 1).** Yield 40% (72.8 mg), yellow oil;  $^1\text{H}$  NMR (400 MHz,  $\text{CDCl}_3$ )  $\delta$  8.39 (s, 1H), 7.69 (s, 1H), 7.43 (d,  $J = 8.4$  Hz, 1H), 2.27 (d,  $J = 6.4$  Hz, 1H), 1.52 (s, 1H), 1.21 (s, 3H);  $^{13}\text{C}$  NMR (100 MHz,  $\text{CDCl}_3$ )  $\delta$  152.0, 150.7, 140.0, 124.3, 123.7, 122.7 (q,  $^1J_{\text{CF}} = 274.4$  Hz), 117.8, 35.5 (q,  $^2J_{\text{CF}} = 34.7$  Hz), 21.2 (q,  $^3J_{\text{CF}} = 1.6$  Hz), 19.1, 12.8;  $^{19}\text{F}$  NMR (376 MHz,  $\text{CDCl}_3$ )  $\delta$  -66.0 (s, 3F); HRMS (ESI): calcd for  $\text{C}_{11}\text{H}_9\text{ClF}_3\text{N}_2$   $[\text{M}+\text{H}]^+$ : 261.0406, found: 261.0404.

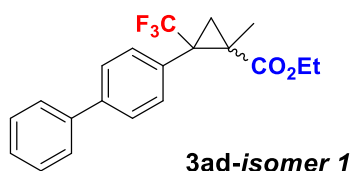

**Ethyl 2-((1,1'-biphenyl)-4-yl)-1-methyl-2-(trifluoromethyl)cyclopropane-1-carboxylate (3ad-isomer 1).** Yield 37% (90.1 mg), yellow oil;  $^1\text{H}$  NMR (400 MHz,  $\text{CDCl}_3$ )  $\delta$  7.56–7.51 (m, 4H), 7.44–7.40 (m, 4H), 7.36–7.32 (m, 1H), 3.80–3.64 (m, 2H), 2.24 (dd,  $J = 5.6$  Hz, 2.0 Hz, 1H), 1.69 (s, 3H), 1.60 (d,  $J = 6.0$  Hz, 1H), 0.85 (t,  $J = 7.2$  Hz, 3H);  $^{13}\text{C}$  NMR (100 MHz,  $\text{CDCl}_3$ )  $\delta$  169.8, 140.3, 139.4, 131.7, 129.8, 127.8, 126.5, 126.1, 125.9, 124.6 (q,  $^1J_{\text{CF}} = 274.4$  Hz), 60.1, 37.1 (q,  $^2J_{\text{CF}} = 32.3$  Hz), 29.7, 19.4 (q,  $^3J_{\text{CF}} = 2.2$  Hz), 14.1 (q,  $^3J_{\text{CF}} = 2.2$  Hz), 12.5;  $^{19}\text{F}$  NMR (376 MHz,  $\text{CDCl}_3$ )  $\delta$  -61.5 (s, 3F); HRMS (ESI): calcd for  $\text{C}_{20}\text{H}_{19}\text{F}_3\text{O}_2\text{Na}$   $[\text{M}+\text{Na}]^+$ : 371.1225, found: 371.1227.

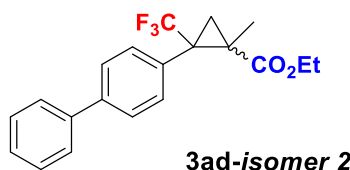

**Ethyl 2-((1,1'-biphenyl)-4-yl)-1-methyl-2-(trifluoromethyl)cyclopropane-1-carboxylate (3ad-isomer 2).** Yield 40% (97.4 mg), yellow solid, m.p.: 92.4–92.7 °C;  $^1\text{H}$  NMR (400 MHz,  $\text{CDCl}_3$ )  $\delta$  7.61–7.58 (m, 4H), 7.46–7.43 (m, 4H), 7.38–7.34 (m, 1H), 4.33–4.17 (m, 2H), 2.12 (d,  $J = 6.0$  Hz, 1H), 1.32 (t,  $J = 7.2$  Hz, 3H), 1.29–1.26 (m, 1H), 1.11 (s, 3H);  $^{13}\text{C}$  NMR (100 MHz,  $\text{CDCl}_3$ )  $\delta$  170.1, 140.5, 139.3, 130.7, 130.3, 127.8, 126.6, 126.2, 126.1, 124.5 (q,  $^1J_{\text{CF}} = 273.6$  Hz), 60.5, 36.6 (q,  $^2J_{\text{CF}} = 32.4$  Hz), 29.9, 19.0, 18.7 (q,  $^3J_{\text{CF}} = 2.0$  Hz), 12.9;  $^{19}\text{F}$  NMR (376 MHz,  $\text{CDCl}_3$ )  $\delta$  -65.5 (s, 3F).

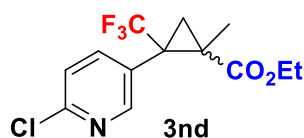

**Ethyl 2-(6-chloropyridin-3-yl)-1-methyl-2-(trifluoromethyl)cyclopropane-1-carboxylate (3nd-isomer 1/isomer 2=5.7/1).** Yield 83% (178.4 mg), yellow oil;  $^1\text{H}$  NMR (400 MHz,  $\text{CDCl}_3$ )  $\delta$  8.35 (d,  $J = 2.0$  Hz, 1H), 7.62 (dd,  $J = 8.4$  Hz, 2.4 Hz, 1H), 7.29 (d,  $J = 7.6$  Hz, 1.14H), 4.30–4.12 (m, 0.36H), 3.90–3.80 (m, 2.05H), 2.32 (d,  $J = 6.4$  Hz, 0.16H), 2.19 (s, 1H), 1.68 (d,  $J = 1.2$  Hz, 3H), 1.67 (s, 0.53H), 1.65 (s, 0.51H), 1.58 (s, 0.19H), 1.28–1.25 (m, 1H), 0.97 (t,  $J = 7.0$  Hz, 3H);  $^{13}\text{C}$  NMR (100 MHz,  $\text{CDCl}_3$ )  $\delta$  169.1, 150.6, 150.4, 139.7, 127.9, 124.0 (q,  $^1J_{\text{CF}} = 274.4$  Hz), 122.9, 61.5, 61.3, 60.6, 60.5, 34.7 (q,  $^2J_{\text{CF}} = 31.8$  Hz), 32.9, 29.7, 26.9, 19.3 (q,  $^3J_{\text{CF}} = 2.1$  Hz), 16.7, 13.8 (q,  $^3J_{\text{CF}} = 2.5$  Hz), 13.0, 12.9, 12.8;  $^{19}\text{F}$  NMR (376 MHz,  $\text{CDCl}_3$ )  $\delta$  -61.6 (s, 3F), -69.6 (s, 0.04F); HRMS (ESI): calcd for  $\text{C}_{13}\text{H}_{14}\text{ClF}_3\text{NO}_2$   $[\text{M}+\text{H}]^+$ : 308.0665, found: 308.0662.

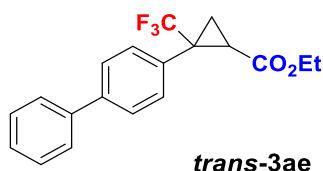

**trans-Ethyl 2-([1,1'-biphenyl]-4-yl)-2-(trifluoromethyl)cyclopropane-1-carboxylate (trans-3ae).** Yield 80% (187.0 mg), yellow oil;  $^1\text{H}$  NMR (400 MHz,  $\text{CDCl}_3$ )  $\delta$  7.58–7.54 (m, 4H), 7.45–7.41 (m, 4H), 7.37–7.33 (m, 1H), 4.01–3.90 (m, 2H), 2.51 (dd,  $J = 8.8$  Hz, 6.4 Hz, 1H), 1.90 (td,  $J = 5.8$  Hz, 1.5 Hz, 1H), 1.74 (dd,  $J = 8.8$  Hz, 5.6 Hz, 1H), 1.04 (t,  $J = 7.2$  Hz, 3H);  $^{13}\text{C}$  NMR (100 MHz,  $\text{CDCl}_3$ )  $\delta$  167.6, 140.7, 139.4, 130.5, 129.4, 127.7, 126.5, 126.2, 126.1, 126.0, 124.0 (q,  $^1J_{\text{CF}} = 273.2$  Hz), 60.1, 34.4 (q,  $^2J_{\text{CF}} = 33.4$  Hz), 22.7 (q,  $^3J_{\text{CF}} = 2.1$  Hz), 13.3 (q,  $^3J_{\text{CF}} = 1.5$  Hz), 12.9;  $^{19}\text{F}$  NMR (376 MHz,  $\text{CDCl}_3$ )  $\delta$  -70.4 (s, 3F); HRMS (EI): calcd for  $\text{C}_{19}\text{H}_{17}\text{F}_3\text{O}_2$   $[\text{M}]^+$ : 334.1181, found: 334.1180.

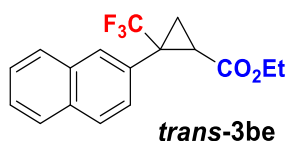

**trans-Ethyl 2-(naphthalen-2-yl)-2-(trifluoromethyl)cyclopropane-1-carboxylate (trans-3be).** Yield 74% (159.5 mg), yellow oil;  $^1\text{H}$  NMR (400 MHz,  $\text{CDCl}_3$ )  $\delta$  7.87 (s, 1H), 7.82–7.78 (m, 3H), 7.50–7.42 (m, 3H), 3.97–3.83 (m, 2H), 2.56 (dd,  $J = 8.4$  Hz, 6.0 Hz, 1H), 1.98 (td,  $J = 5.8$  Hz, 1.3 Hz, 1H), 1.79 (dd,  $J = 8.8$  Hz, 5.2 Hz, 1H), 0.96 (t,  $J = 7.2$  Hz, 3H);  $^{13}\text{C}$  NMR (100 MHz,  $\text{CDCl}_3$ )  $\delta$  168.7, 133.4, 133.1, 131.1, 128.9, 128.1 (t,  $^3J_{\text{CF}} = 5.3$  Hz), 127.8, 126.7, 126.4, 125.2 (q,  $^1J_{\text{CF}} = 273.1$  Hz), 61.2, 35.9 (q,  $^2J_{\text{CF}} = 33.3$  Hz), 23.9 (q,  $^3J_{\text{CF}} = 1.6$  Hz), 14.6 (q,  $^3J_{\text{CF}} = 1.8$  Hz), 14.0;  $^{19}\text{F}$  NMR (376 MHz,  $\text{CDCl}_3$ )  $\delta$  -70.2 (s, 3F); HRMS (EI): calcd for  $\text{C}_{17}\text{H}_{15}\text{F}_3\text{O}_2$   $[\text{M}]^+$ : 308.1024, found: 308.1022.

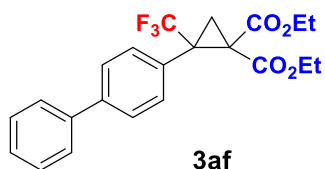

**Diethyl 2-((1,1'-biphenyl)-4-yl)-2-(trifluoromethyl)cyclopropane-1,1-dicarboxylate (3af).** Yield 44% (125.0 mg), yellow oil;  $^1\text{H}$  NMR (400 MHz,  $\text{CDCl}_3$ )  $\delta$  7.58–7.55 (m, 4H), 7.48–7.42 (m, 4H), 7.37–7.33 (m, 1H), 4.36–4.31 (m, 2H), 3.97–3.84 (m, 2H), 2.27 (d,  $J = 6.0$  Hz, 1H), 2.14 (d,  $J = 5.2$  Hz, 1H), 1.36 (t,  $J = 7.0$  Hz, 3H), 0.95 (t,  $J = 7.0$  Hz, 3H);  $^{13}\text{C}$  NMR (100 MHz,  $\text{CDCl}_3$ )  $\delta$  164.6, 140.9, 139.3, 130.1, 129.3, 127.8, 126.6, 126.1, 126.0, 123.4 (q,  $^1J_{\text{CF}} = 274.4$  Hz), 61.2, 39.2 (q,  $^2J_{\text{CF}} = 33.2$  Hz), 38.6, 17.8 (q,  $^3J_{\text{CF}} = 1.7$  Hz), 12.8, 12.6;  $^{19}\text{F}$  NMR (376 MHz,  $\text{CDCl}_3$ )  $\delta$  –66.9 (s, 3F); HRMS (ESI): calcd for  $\text{C}_{22}\text{H}_{21}\text{F}_3\text{O}_4 \text{Na}$   $[\text{M}+\text{Na}]^+$ : 429.1290, found: 429.1292.

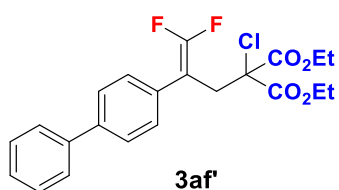

**Diethyl 2-(2-((1,1'-biphenyl)-4-yl)-3,3-difluoroallyl)-2-chloromalonate (3af').** Yield 36% (106.3 mg), yellow oil;  $^1\text{H}$  NMR (400 MHz,  $\text{CDCl}_3$ )  $\delta$  7.58–7.55 (m, 4H), 7.46–7.42 (m, 2H), 7.37–7.32 (m, 3H), 4.00–3.92 (m, 2H), 3.88–3.80 (m, 2H), 3.47 (t,  $J = 1.8$  Hz, 2H), 1.14 (t,  $J = 7.0$  Hz, 6H);  $^{13}\text{C}$  NMR (100 MHz,  $\text{CDCl}_3$ )  $\delta$  166.0, 155.4 (t,  $^1J_{\text{CF}} = 289.7$  Hz), 140.7, 140.4, 131.0 (t,  $^3J_{\text{CF}} = 2.9$  Hz), 129.7 (t,  $^3J_{\text{CF}} = 2.5$  Hz), 128.9, 127.6, 127.0, 126.8, 87.0 (t,  $^2J_{\text{CF}} = 19.5$  Hz), 69.2 (t,  $^3J_{\text{CF}} = 2.8$  Hz), 63.1, 36.1 (d,  $^3J_{\text{CF}} = 2.4$  Hz), 13.7;  $^{19}\text{F}$  NMR (376 MHz,  $\text{CDCl}_3$ )  $\delta$  –87.0 (d,  $J = 8.2$  Hz, 1F), –87.5 (d,  $J = 8.3$  Hz, 1F); HRMS (ESI): calcd for  $\text{C}_{22}\text{H}_{21}\text{ClF}_2\text{O}_4 \text{Na}$   $[\text{M}+\text{Na}]^+$ : 445.0994, found: 445.0992.

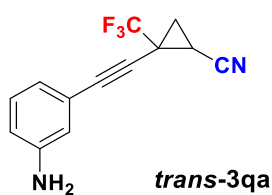

**trans-2-((3-Aminophenyl)ethynyl)-2-(trifluoromethyl)cyclopropane-1-carbonitrile (trans-3qa).** Yield 73% (127.8 mg), yellow oil;  $^1\text{H}$  NMR (400 MHz,  $\text{CDCl}_3$ )  $\delta$  7.10 (t,  $J = 7.8$  Hz, 1H), 6.91 (d,  $J = 7.6$  Hz, 1H), 6.83 (s, 1H), 6.69 (d,  $J = 7.6$  Hz, 1H), 3.68 (s, 2H), 2.26 (t,  $J = 8.2$  Hz, 1H), 1.88–1.84 (m, 1H), 1.79 (m, 1H);  $^{13}\text{C}$  NMR (100 MHz,  $\text{CDCl}_3$ )  $\delta$  145.1, 128.3, 121.5, 120.5, 121.8 (q,  $^1J_{\text{CF}} = 273.4$  Hz), 117.3, 115.4, 115.2, 84.5, 77.1, 23.2 (q,  $^2J_{\text{CF}} = 38.7$  Hz), 17.9 (q,  $^3J_{\text{CF}} = 2.3$  Hz), 10.2 (q,  $^3J_{\text{CF}} = 4.5$  Hz);  $^{19}\text{F}$  NMR (376 MHz,  $\text{CDCl}_3$ )  $\delta$  –71.0 (s, 3F); HRMS (EI): calcd for  $\text{C}_{13}\text{H}_9\text{F}_3\text{N}_2$   $[\text{M}]^+$ : 250.0718, found: 250.0721.

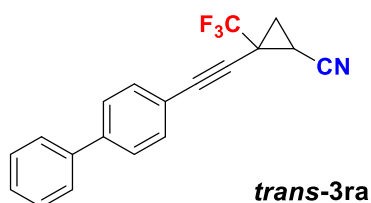

**trans-2-((1,1'-Biphenyl)-4-ylethynyl)-2-(trifluoromethyl)cyclopropane-1-carbonitrile (*trans*-3ra).** Yield 87% (189.4 mg), yellow solid, m.p.: 85.7–86.9 °C;  $^1\text{H}$  NMR (400 MHz,  $\text{CDCl}_3$ )  $\delta$  7.60–7.54 (m, 6H), 7.46–7.42 (m, 2H), 7.38–7.34 (m, 1H), 2.27 (dd,  $J = 9.6$  Hz, 6.8 Hz, 1H), 1.87 (dd,  $J = 9.6$  Hz, 6.0 Hz, 1H), 1.81–1.77 (m, 1H);  $^{13}\text{C}$  NMR (100 MHz,  $\text{CDCl}_3$ )  $\delta$  142.2, 140.1, 132.8, 129.0, 127.9, 127.1, 122.9 (q,  $^1J_{\text{CF}} = 273.5$  Hz), 119.8, 116.3, 85.2, 79.5 (q,  $^3J_{\text{CF}} = 1.3$  Hz), 24.3 (q,  $^2J_{\text{CF}} = 38.8$  Hz), 19.0, 11.4;  $^{19}\text{F}$  NMR (376 MHz,  $\text{CDCl}_3$ )  $\delta$  -70.9 (d,  $J = 1.1$  Hz, 3F); HRMS (EI): calcd for  $\text{C}_{19}\text{H}_{12}\text{F}_3\text{N}$   $[\text{M}]^+$ : 311.0922, found: 311.0920.

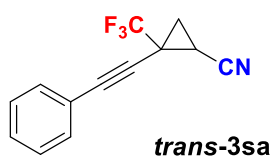

**trans-2-(Phenylethynyl)-2-(trifluoromethyl)cyclopropane-1-carbonitrile (*trans*-3sa).** Yield 70% (115.2 mg), yellow oil;  $^1\text{H}$  NMR (400 MHz,  $\text{CDCl}_3$ )  $\delta$  7.53–7.50 (m, 2H), 7.38–7.30 (m, 3H), 2.26 (dd,  $J = 9.6$  Hz, 6.8 Hz, 1H), 1.86 (dd,  $J = 9.6$  Hz, 6.0 Hz, 1H), 1.79–1.75 (m, 1H);  $^{13}\text{C}$  NMR (100 MHz,  $\text{CDCl}_3$ )  $\delta$  132.3, 129.5, 128.4, 122.9 (q,  $^1J_{\text{CF}} = 273.4$  Hz), 121.0, 116.2, 85.3, 78.9, 24.3 (q,  $^2J_{\text{CF}} = 38.7$  Hz), 19.0, 11.4 (q,  $^3J_{\text{CF}} = 3.0$  Hz);  $^{19}\text{F}$  NMR (376 MHz,  $\text{CDCl}_3$ )  $\delta$  -71.0 (s, 3F); HRMS (EI): calcd for  $\text{C}_{13}\text{H}_8\text{F}_3\text{N}$   $[\text{M}]^+$ : 235.0609, found: 235.0607.

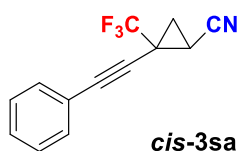

**cis-2-(Phenylethynyl)-2-(trifluoromethyl)cyclopropane-1-carbonitrile (*cis*-3sa).** Yield 11% (18.1 mg), yellow oil;  $^1\text{H}$  NMR (400 MHz,  $\text{CDCl}_3$ )  $\delta$  7.45–7.42 (m, 2H), 7.38–7.31 (m, 3H), 2.24 (t,  $J = 8.4$  Hz, 1H), 2.01–1.98 (m, 1H), 1.85–1.80 (m, 1H);  $^{13}\text{C}$  NMR (100 MHz,  $\text{CDCl}_3$ )  $\delta$  132.1, 129.5, 128.5, 122.8 (q,  $^1J_{\text{CF}} = 274.2$  Hz), 120.9, 115.0, 83.0, 80.9, 19.1 (q,  $^3J_{\text{CF}} = 1.2$  Hz), 11.7;  $^{19}\text{F}$  NMR (376 MHz,  $\text{CDCl}_3$ )  $\delta$  -67.6 (s, 3F).

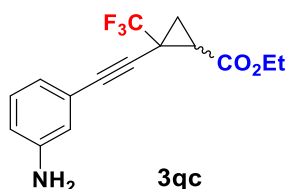

**Ethyl 2-((3-aminophenyl)ethynyl)-2-(trifluoromethyl)cyclopropane-1-carboxylate (3qc, *trans/cis*=3/1).** Yield 52% (108.1 mg), yellow oil;  $^1\text{H}$  NMR (400 MHz,  $\text{CDCl}_3$ )  $\delta$  7.07 (t,  $J = 7.6$  Hz, 1H), 6.83 (d,  $J = 7.6$  Hz, 1H), 6.75 (s, 1H), 6.64 (d,  $J = 7.2$  Hz, 1H), 4.29–4.14 (m, 2H), 3.54 (s, 2H), 2.48–2.41 (m, 1H), 2.02 (dd,  $J = 8.0$  Hz, 6.0 Hz,



0.25H), 1.87–1.84 (m, 0.75H), 1.67 (dd,  $J = 8.8$  Hz, 5.6 Hz, 0.75H), 1.64–1.60 (m, 0.26H), 1.29 (t,  $J = 7.2$  Hz, 3H);  $^{13}\text{C}$  NMR (100 MHz,  $\text{CDCl}_3$ )  $\delta$  166.6, 165.5, 145.2, 145.1, 128.3, 128.2, 121.6, 121.3, 121.3, 120.0 (q,  $^1J_{\text{CF}} = 272.9$  Hz), 117.1, 114.9, 114.7, 82.7, 80.2, 78.6, 60.8, 60.6, 28.7, 28.4, 24.6, 23.2 (q,  $^2J_{\text{CF}} = 37.8$  Hz), 16.6 (q,  $^3J_{\text{CF}} = 1.2$  Hz), 16.3, 13.2, 13.0;  $^{19}\text{F}$  NMR (376 MHz,  $\text{CDCl}_3$ )  $\delta$   $-65.5$  (s, 1F),  $-70.7$  (s, 3F); HRMS (ESI): calcd for  $\text{C}_{15}\text{H}_{15}\text{F}_3\text{NO}_2$   $[\text{M}+\text{H}]^+$ : 298.1055, found: 298.1053.

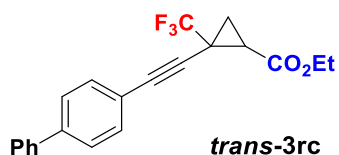

**trans-Ethyl 2-([1,1'-biphenyl]-4-ylethynyl)-2-(trifluoromethyl)cyclopropane-1-carboxylate (*trans*-3rc).** Yield 86% (215.5 mg), yellow solid, m.p.: 54.9–56.8 °C;  $^1\text{H}$  NMR (400 MHz,  $\text{CDCl}_3$ )  $\delta$  7.57–7.48 (m, 6H), 7.45–7.41 (m, 2H), 7.36–7.33 (m, 1H), 4.24 (q,  $J = 7.2$  Hz, 2H), 2.46 (dd,  $J = 8.8$  Hz, 7.2 Hz, 1H), 1.91–1.87 (m, 1H), 1.69 (dd,  $J = 8.8$  Hz, 5.6 Hz, 1H), 1.29 (t,  $J = 7.0$  Hz, 3H);  $^{13}\text{C}$  NMR (100 MHz,  $\text{CDCl}_3$ )  $\delta$  167.7, 141.5, 140.3, 132.5, 128.9, 127.8, 127.1, 127.0, 123.9 (q,  $^1J_{\text{CF}} = 272.9$  Hz), 120.9, 83.4, 81.0, 61.7, 25.7, 24.4 (q,  $^2J_{\text{CF}} = 37.9$  Hz), 17.4, 14.4;  $^{19}\text{F}$  NMR (376 MHz,  $\text{CDCl}_3$ )  $\delta$   $-70.6$  (s, 3F); HRMS (EI): calcd for  $\text{C}_{21}\text{H}_{17}\text{F}_3\text{O}_2$   $[\text{M}]^+$ : 358.1181, found: 358.1185.

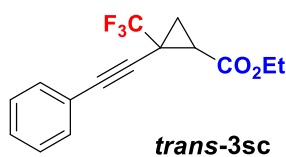

**trans-Ethyl 2-(phenylethynyl)-2-(trifluoromethyl)cyclopropane-1-carboxylate (*trans*-3sc).** Yield 51% (100.7 mg), yellow oil;  $^1\text{H}$  NMR (400 MHz,  $\text{CDCl}_3$ )  $\delta$  7.42 (d,  $J = 6.8$  Hz, 2H), 7.33–7.25 (m, 3H), 4.23 (q, 7.2 Hz, 2H), 2.44 (t,  $J = 8.0$  Hz, 1H), 1.89–1.86 (m, 1H), 1.70–1.66 (m, 1H), 1.28 (t,  $J = 7.2$  Hz, 3H);  $^{13}\text{C}$  NMR (100 MHz,  $\text{CDCl}_3$ )  $\delta$  166.6, 130.9, 128.1, 127.8, 127.7, 127.2, 122.7 (q,  $^1J_{\text{CF}} = 272.8$  Hz), 121.0, 82.4, 79.3, 60.6, 24.6, 23.2 (q,  $^2J_{\text{CF}} = 37.9$  Hz), 16.3, 13.2;  $^{19}\text{F}$  NMR (376 MHz,  $\text{CDCl}_3$ )  $\delta$   $-70.7$  (s, 3F); HRMS (ESI): calcd for  $\text{C}_{15}\text{H}_{14}\text{F}_3\text{O}_2$   $[\text{M}+\text{H}]^+$ : 283.0946, found: 283.0943.

## 9. References

- (1) Y. Q. Guo, Y. P. Cao, H. J. Song, Y. X. Liu and Q. M. Wang, Photoredox relay-catalyzed *gem*-difluoroallylation of alkyl iodides, *Chem. Commun.*, 2021, **57**, 9768.
- (2) F. L. Chen, X. F. Xu, Y. L. He, G. P. Huang and S. L. Zhu, NiH-Catalyzed migratory defluorinative olefin cross-coupling: trifluoromethyl-substituted alkenes as acceptor olefins to form *gem*-difluoroalkenes, *Angew. Chem., Int. Ed.*, 2020, **59**, 5398.
- (3) Y. F. Chen, N. N. Ni, D. P. Cheng and X. L. Xu, The coupling of alkylboronic acids with  $\alpha$ -(trifluoromethyl)styrenes by lewis base/photoredox dual catalysis, *Tetrahedron Lett.*, 2020, **61**, 152425.
- (4) Y. Li, B. Zhao, K. Dai, D. H. Tu, B. Wang, Y. Y. Wang, Z. T. Liu, Z. W. Liu and J. Lu, Palladium-catalyzed Suzuki-Miyaura reaction of fluorinated vinyl chloride: a new approach for synthesis  $\alpha$  and  $\alpha,\beta$ -difluoromethylstyrenes, *Tetrahedron*, 2016, **72**, 5684.
- (5) W. J. Yue, C. S. Day and R. Martin, Site-selective defluorinative  $sp^3$  C–H alkylation of secondary amides, *J. Am. Chem. Soc.*, 2021, **143**, 6395.
- (6) C. M. Hu, F. Hong and Y. Y. Xu, Synthesis of trifluoromethyl-substituted conjugated enynes including a fluorinated siccayne, *J. Fluorine Chem.*, 1993, **64**, 1.
- (7) J. R. Denton, D. Sukumaran and H. M. L. Davies, Enantioselective synthesis of trifluoromethyl-substituted cyclopropanes, *Org. Lett.*, 2007, **14**, 2625.

# 10. <sup>1</sup>H, <sup>13</sup>C, <sup>19</sup>F NMR and HRMS spectra of target compounds

<sup>1</sup>H NMR spectrum of *trans*-3aa

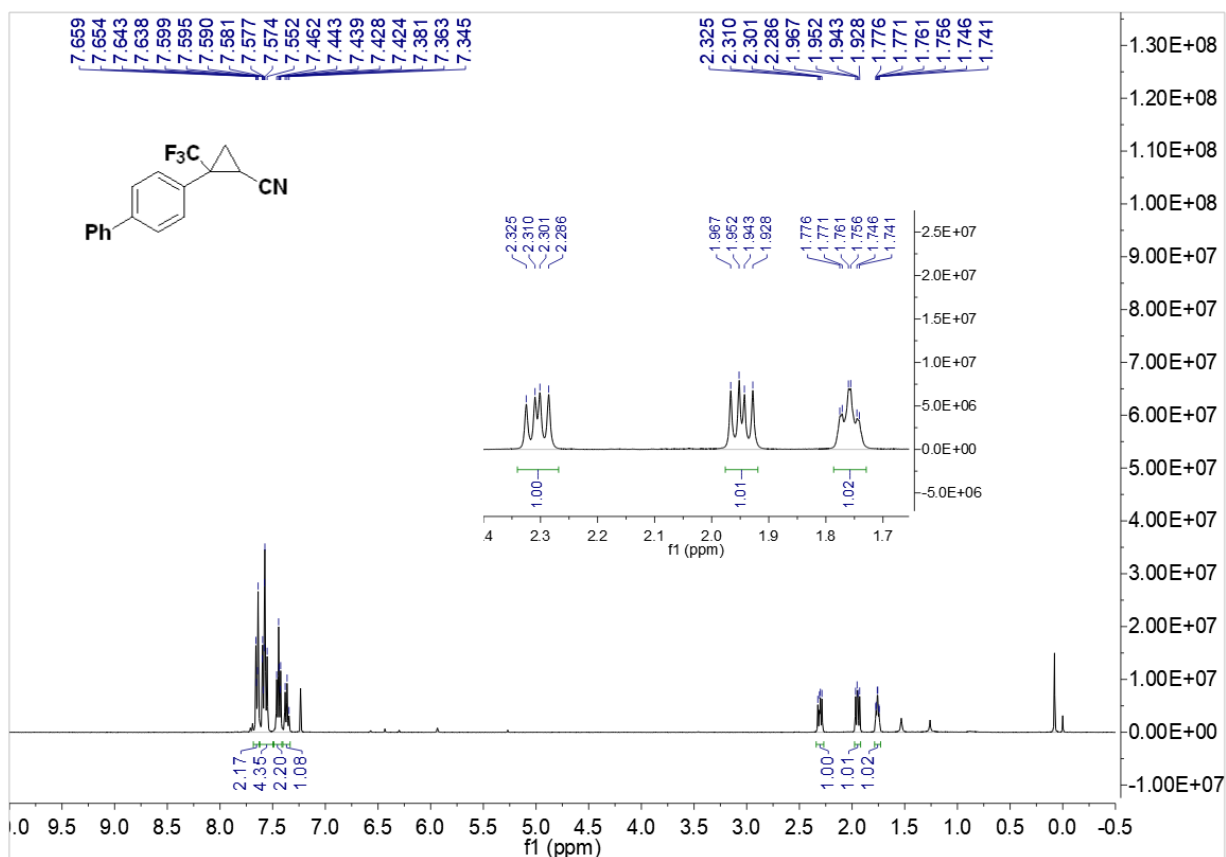

<sup>13</sup>C NMR spectrum of *trans*-3aa

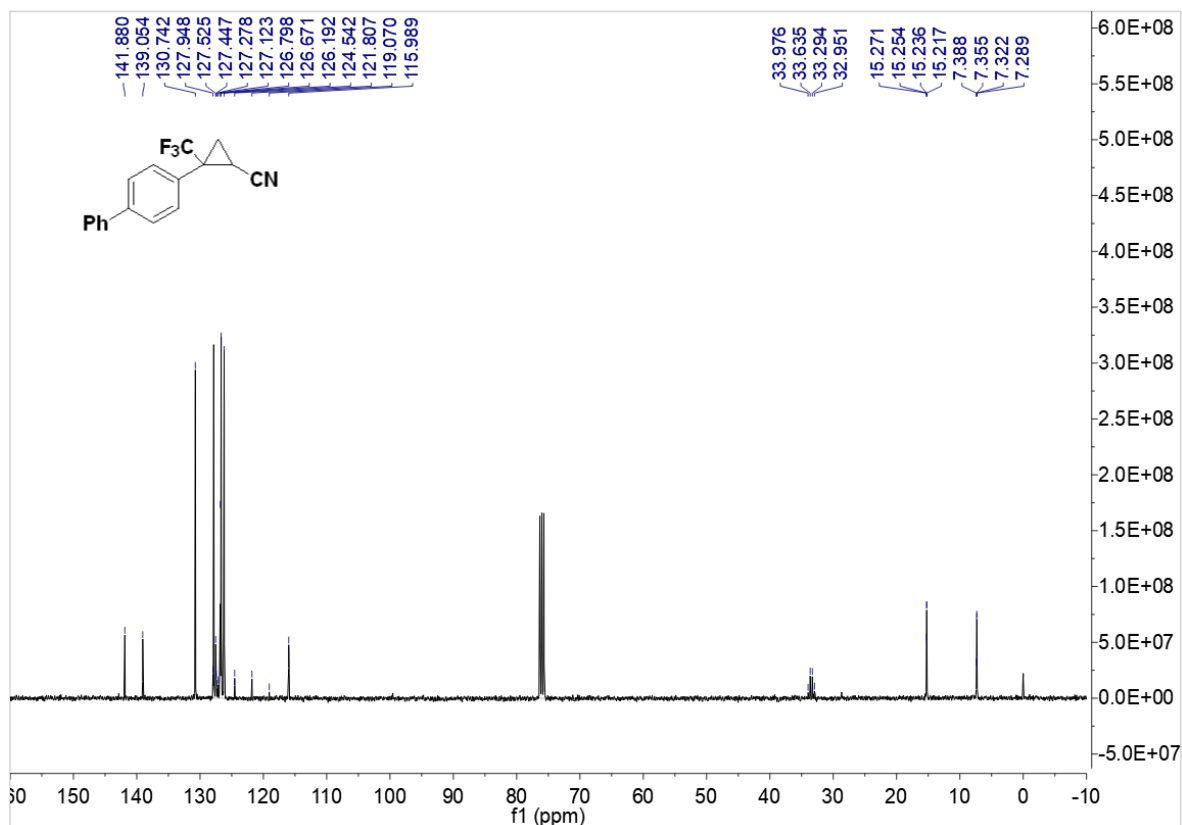

$^{19}\text{F}$  NMR spectrum of *trans*-3aa

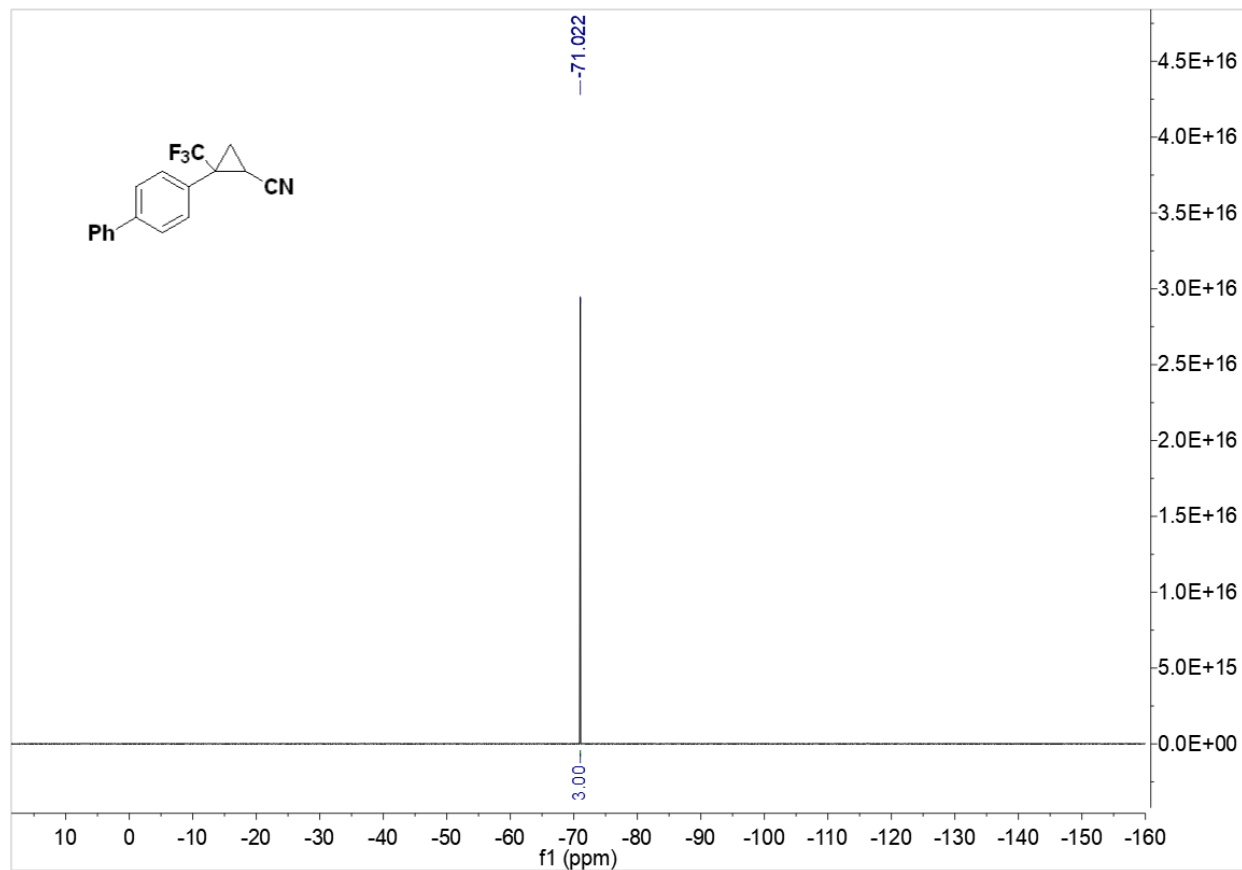

HRMS (EI) spectrum of *trans*-3aa

CS-DYP-287S

Waters GCT Premier

20221701 415 (6.917) Cm (415-(15+29))

TOF MS EI+  
287.0919 1.44e4

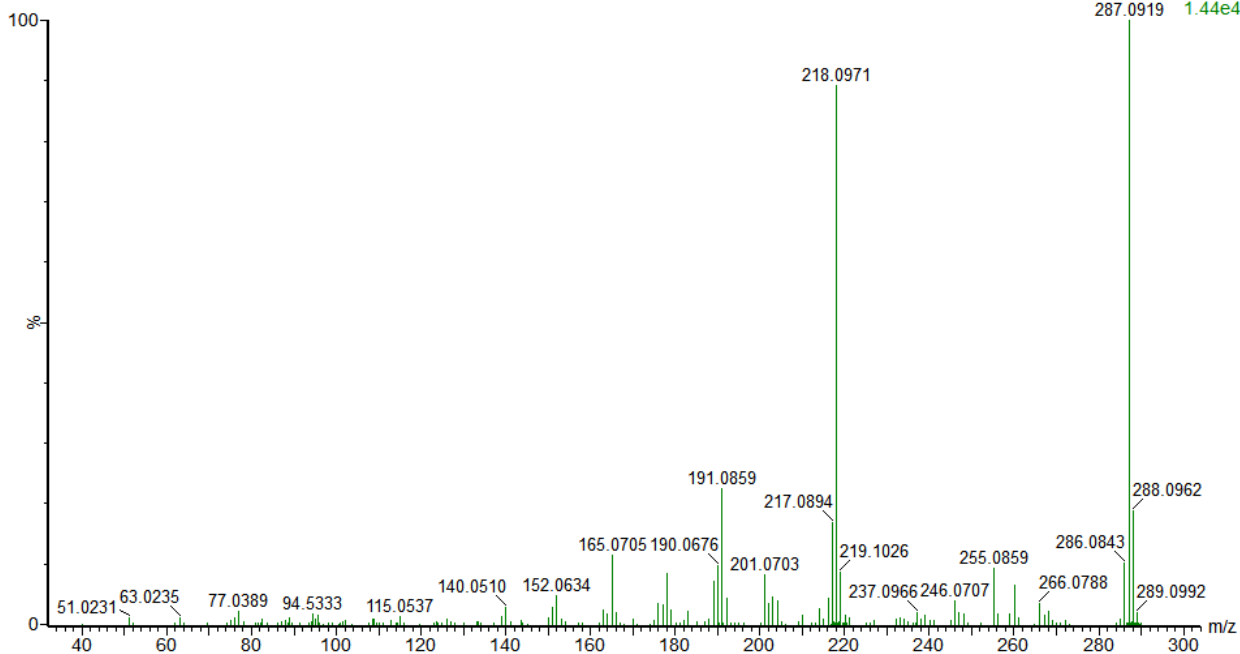

$^1\text{H}$  NMR spectrum of *cis*-3aa

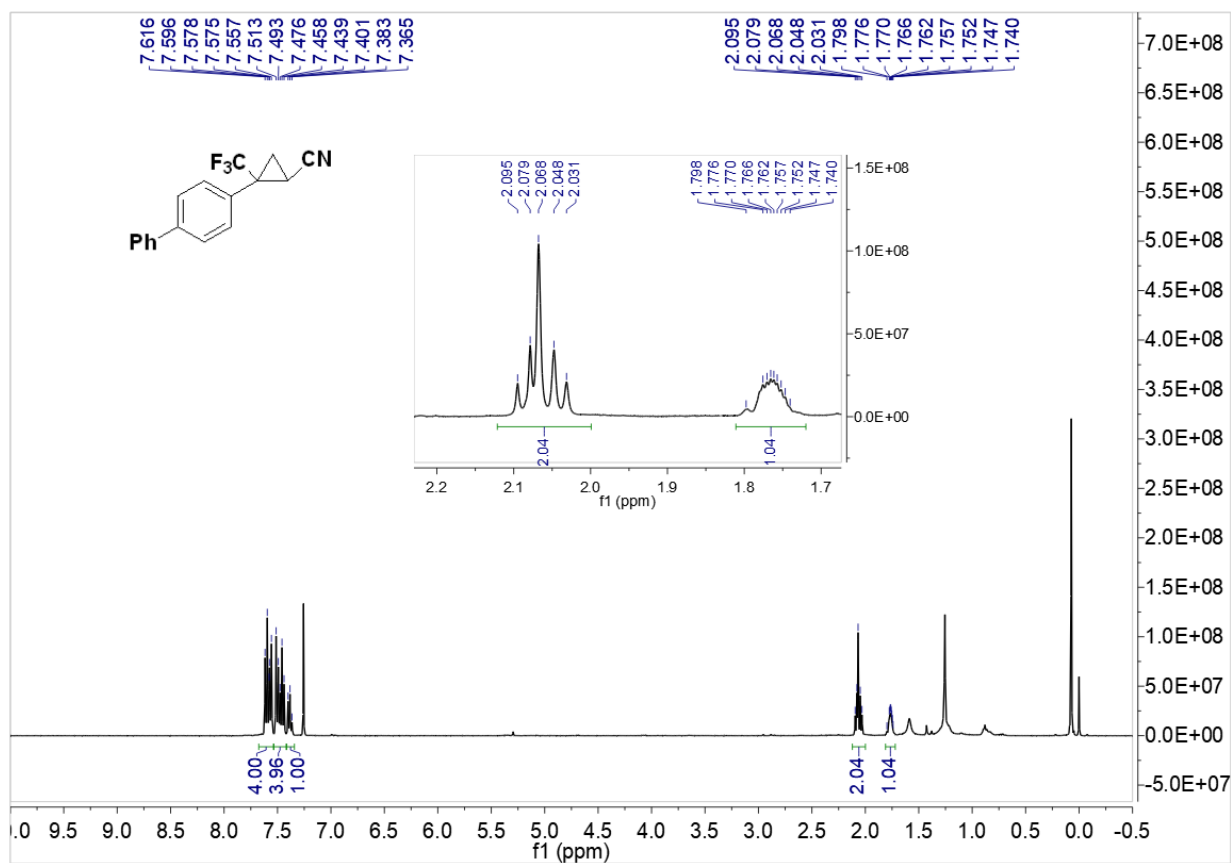

$^{13}\text{C}$  NMR spectrum of *cis*-3aa

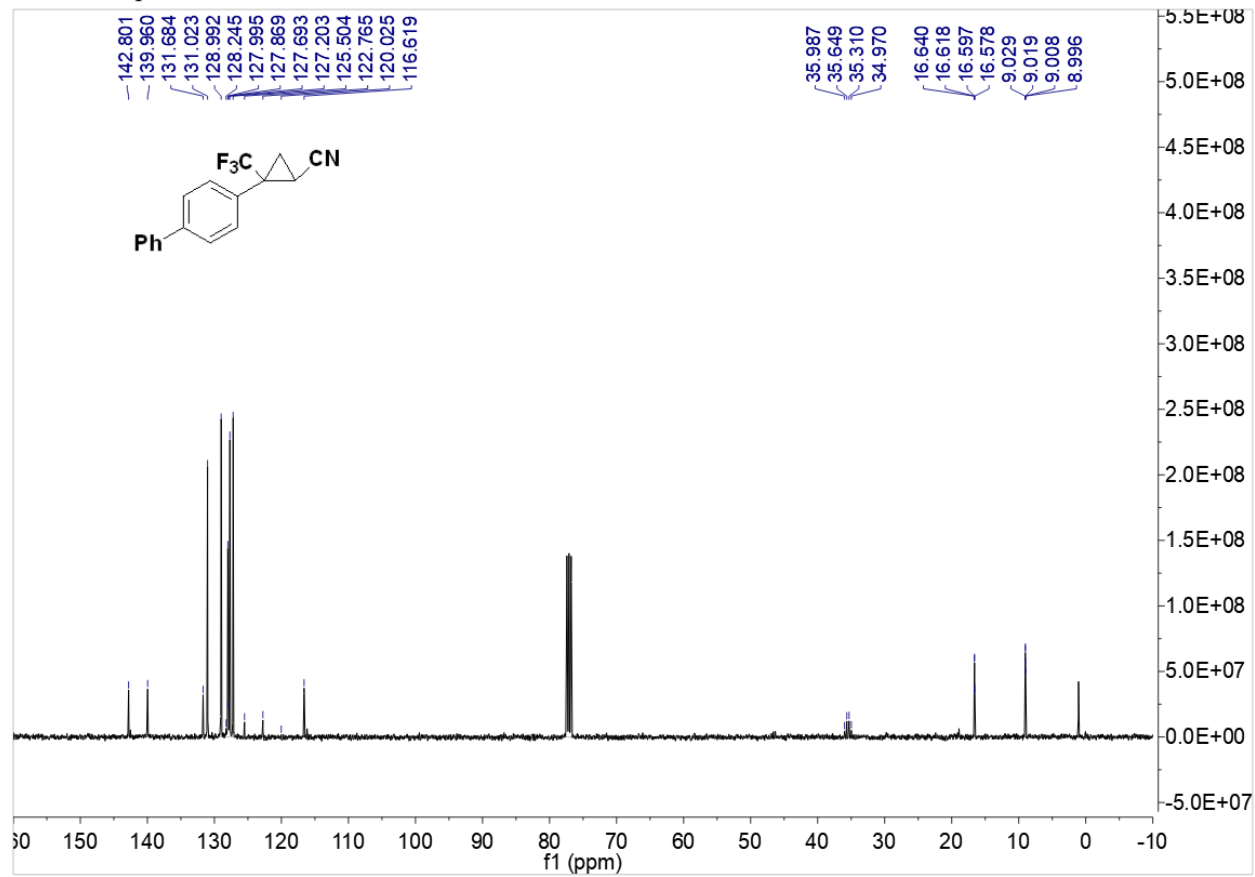

<sup>19</sup>F NMR spectrum of *cis*-3aa

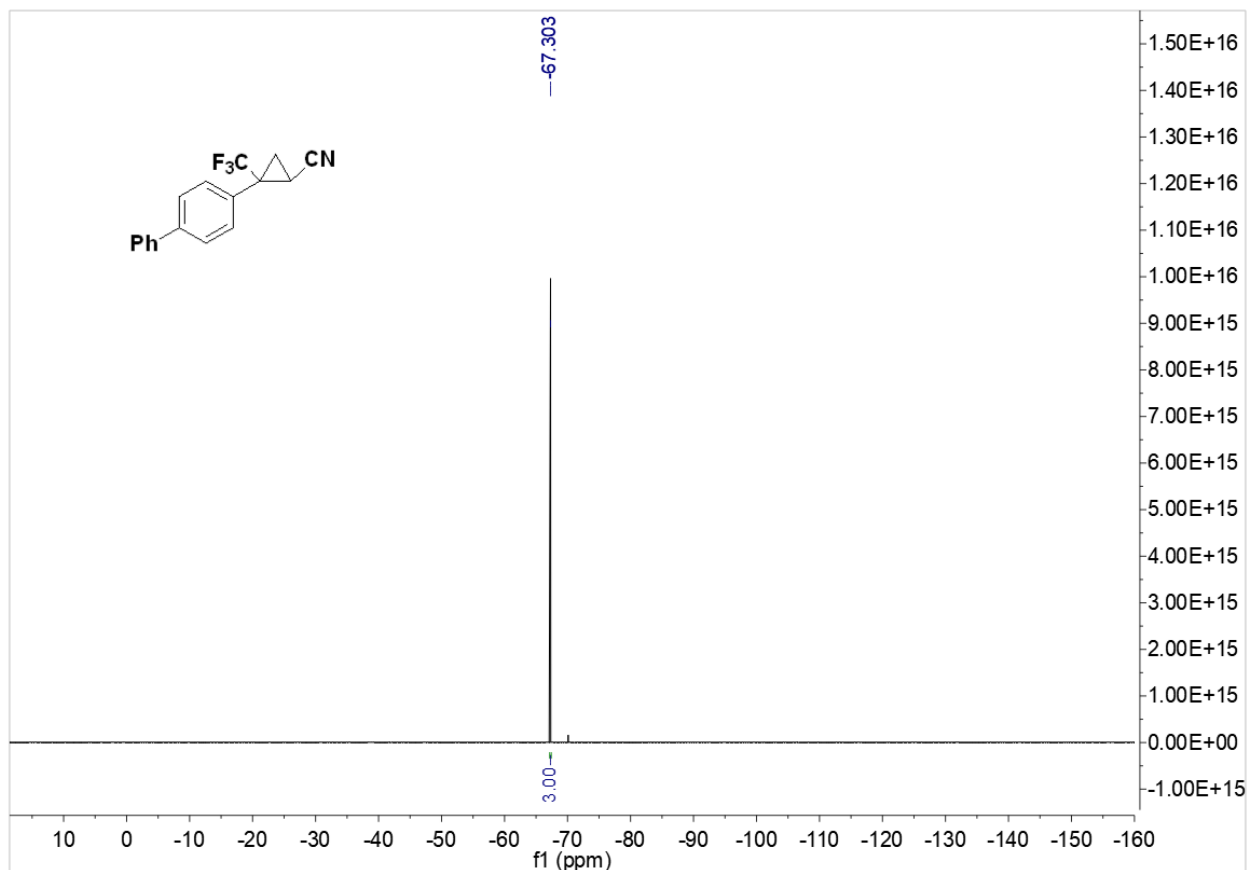

<sup>1</sup>H NMR spectrum of *trans*-3ba

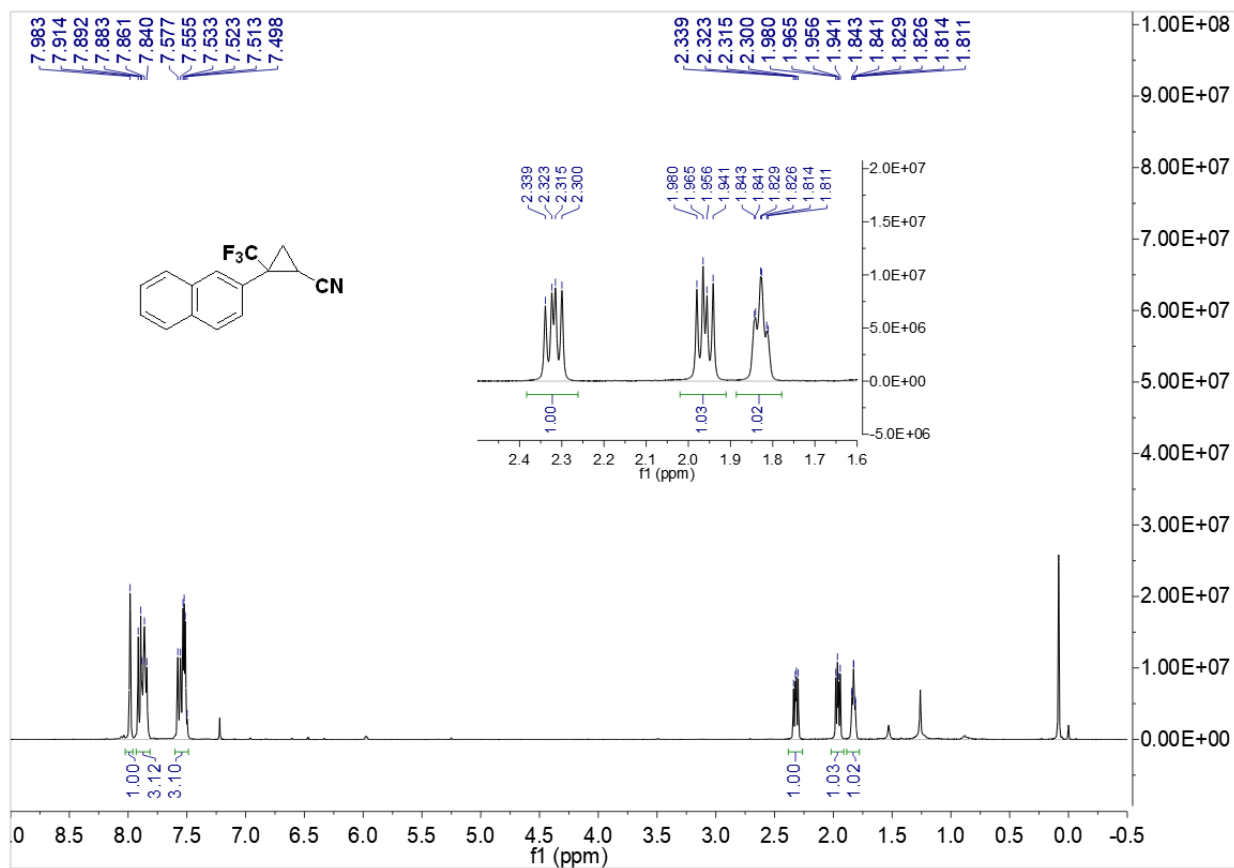

$^{13}\text{C}$  NMR spectrum of *trans*-3ba

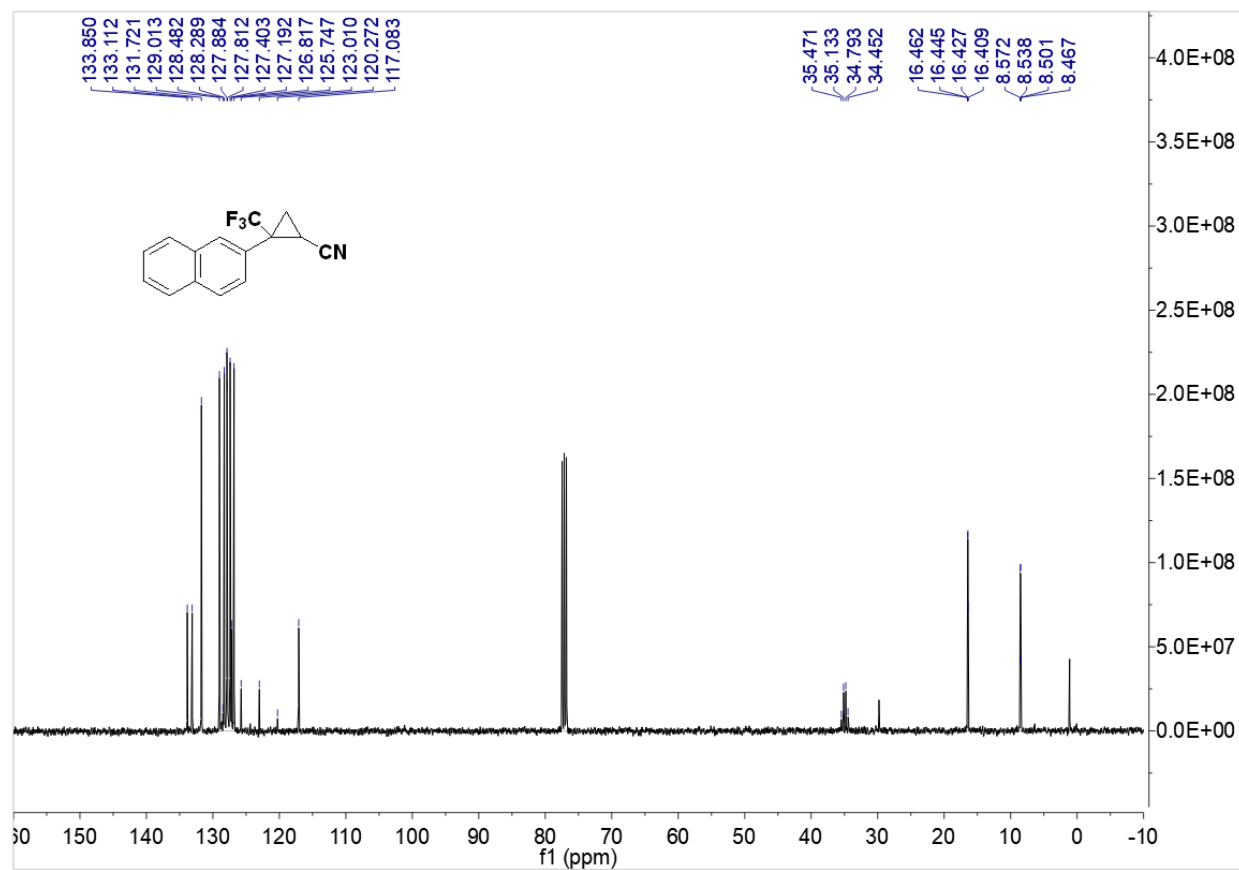

$^{19}\text{F}$  NMR spectrum of *trans*-3ba

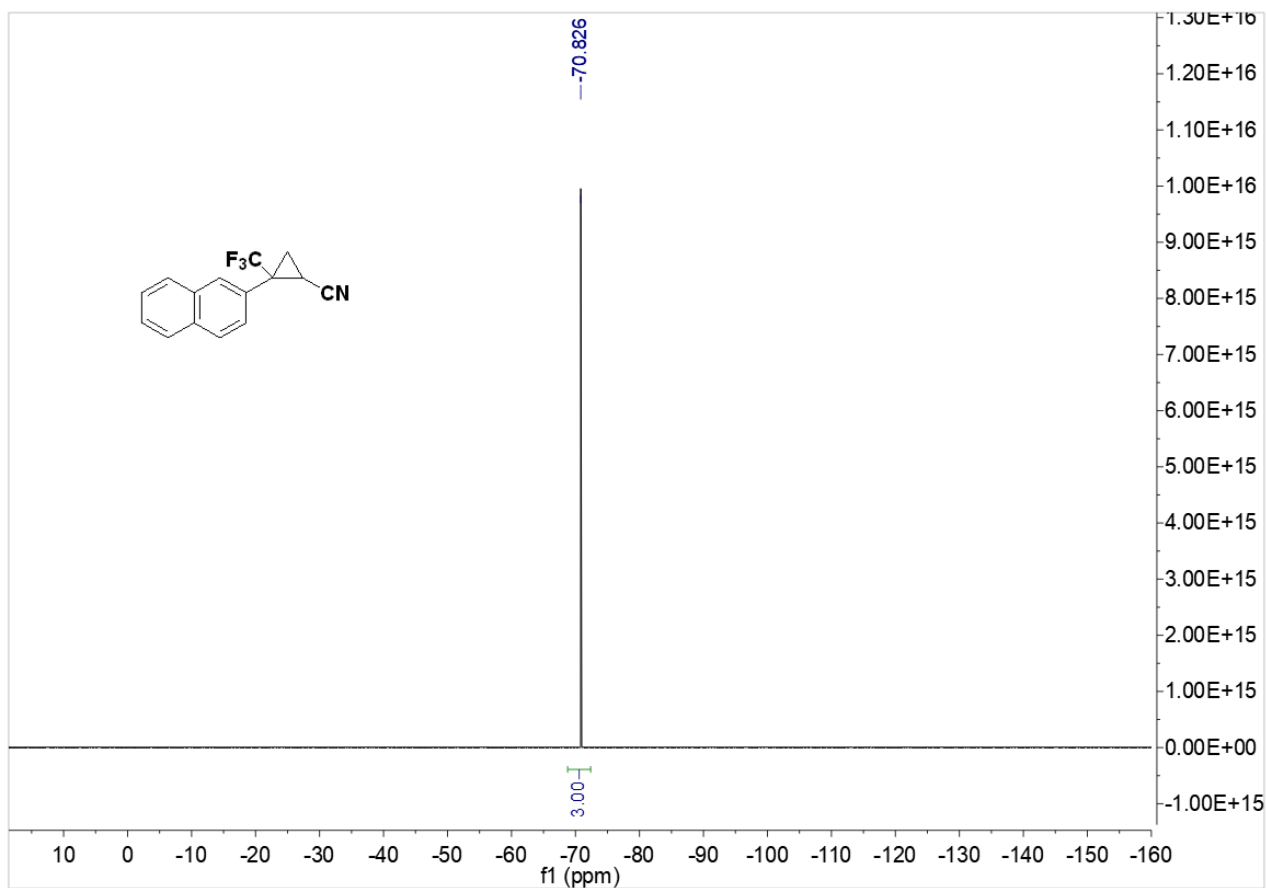

# HRMS (EI) spectrum of *trans*-3ba

CS-DYP-261S

20221702 187 (3.117) Cm (187-(24+54))

Waters GCT Premier

TOF MS EI+  
1.39e4

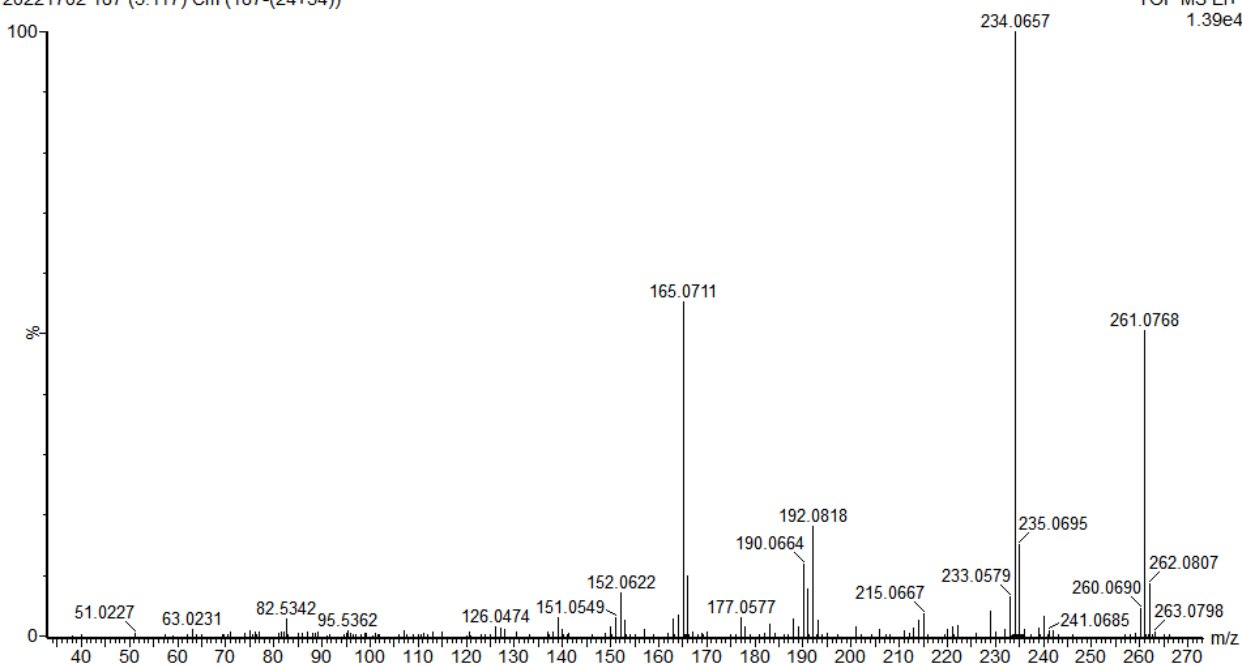

# <sup>1</sup>H NMR spectrum of *cis*-3ba

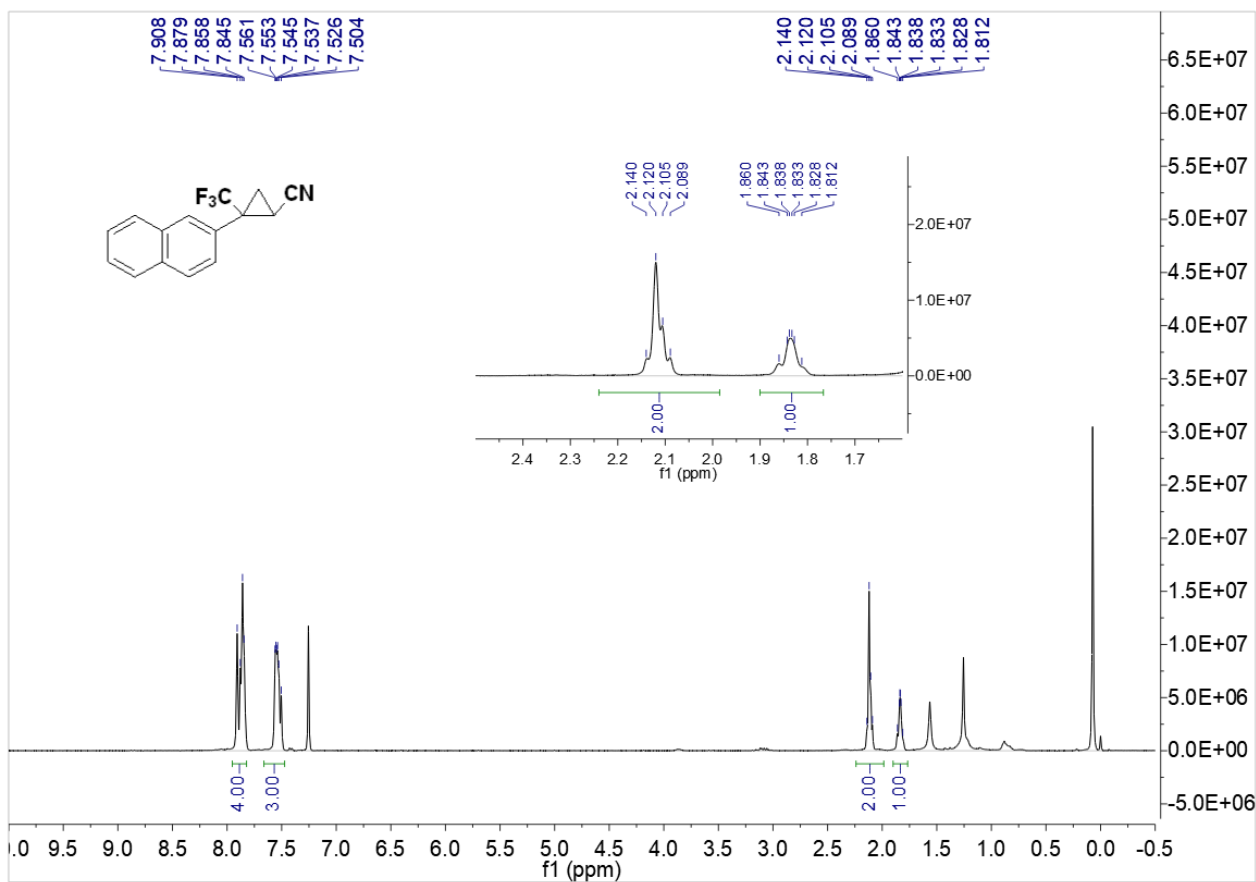



<sup>13</sup>C NMR spectrum of *cis*-3ba

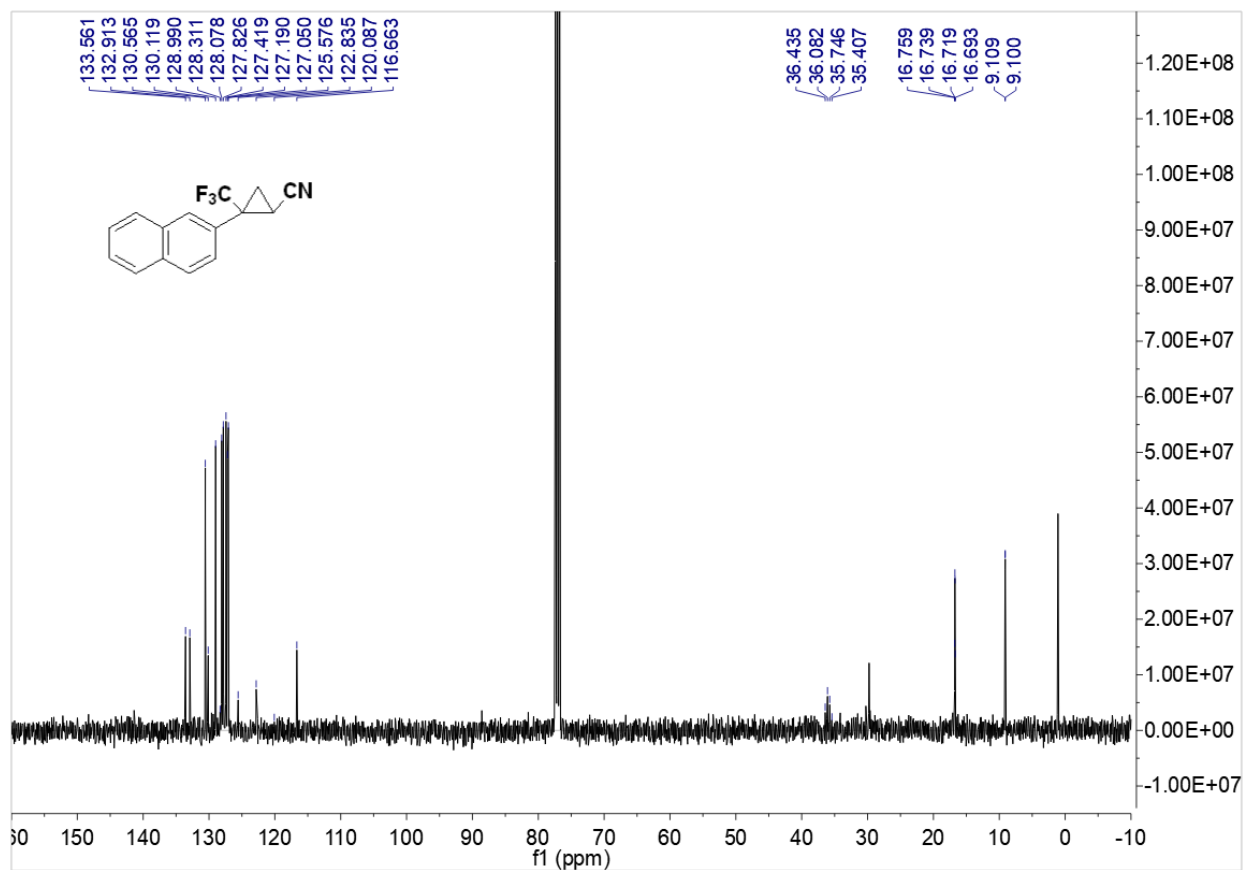

<sup>19</sup>F NMR spectrum of *cis*-3ba

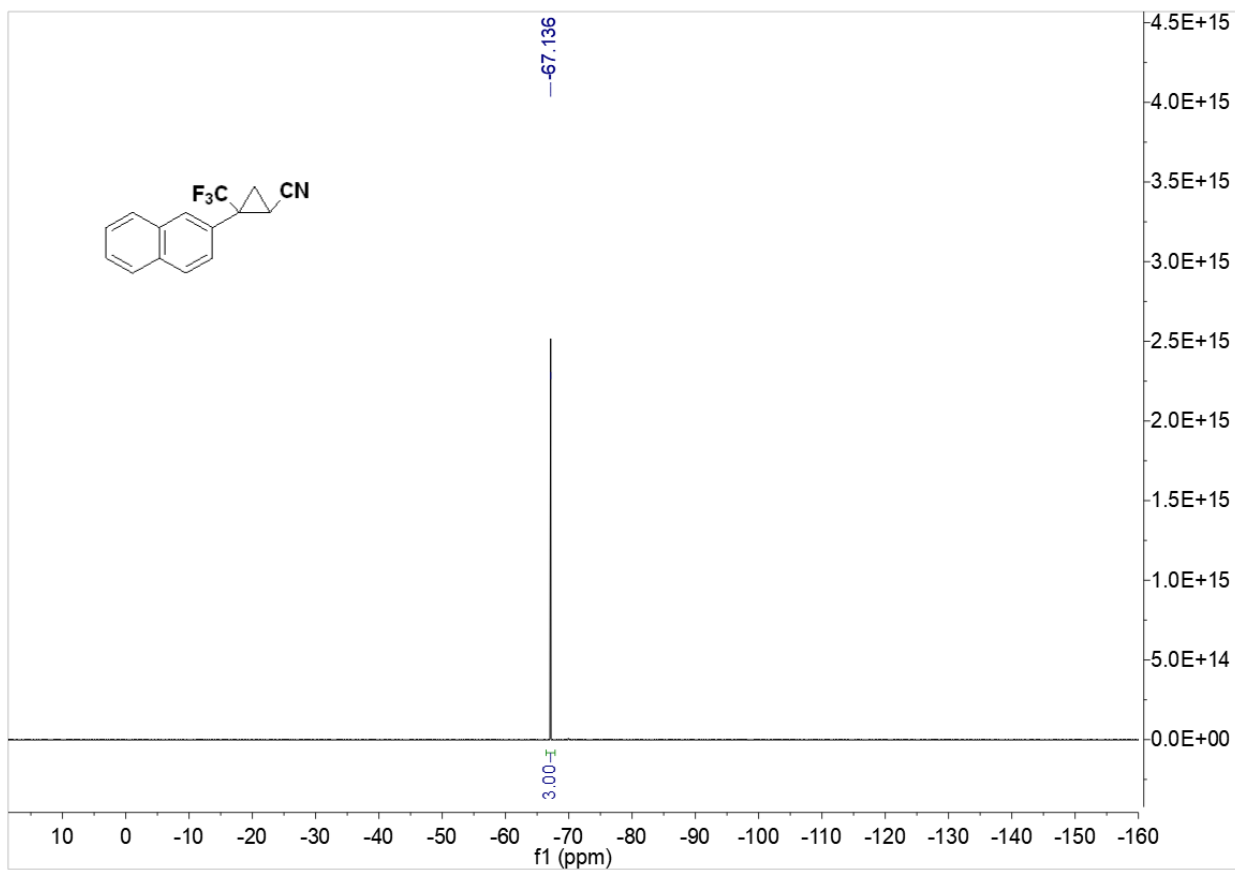

<sup>1</sup>H NMR spectrum of *trans*-3ca

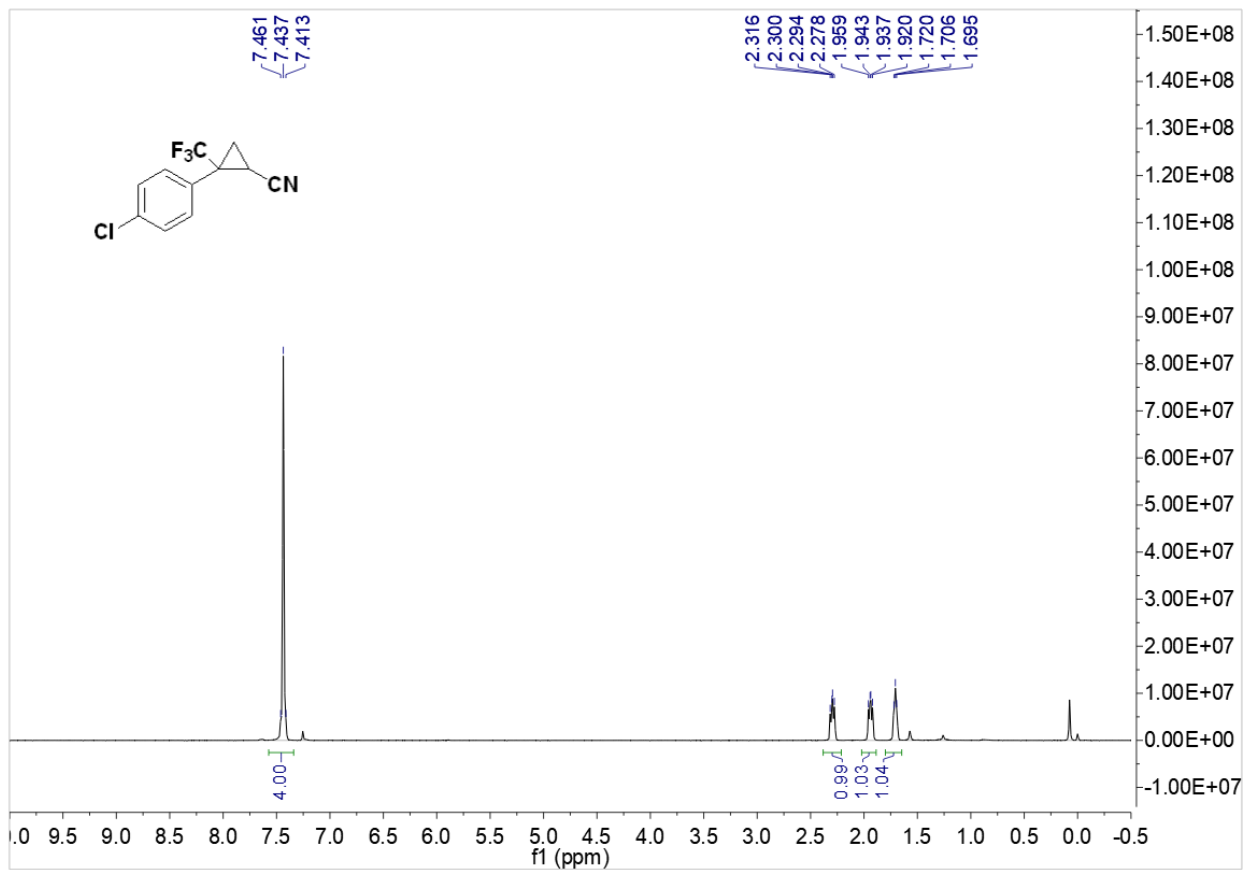

<sup>13</sup>C NMR spectrum of *trans*-3ca

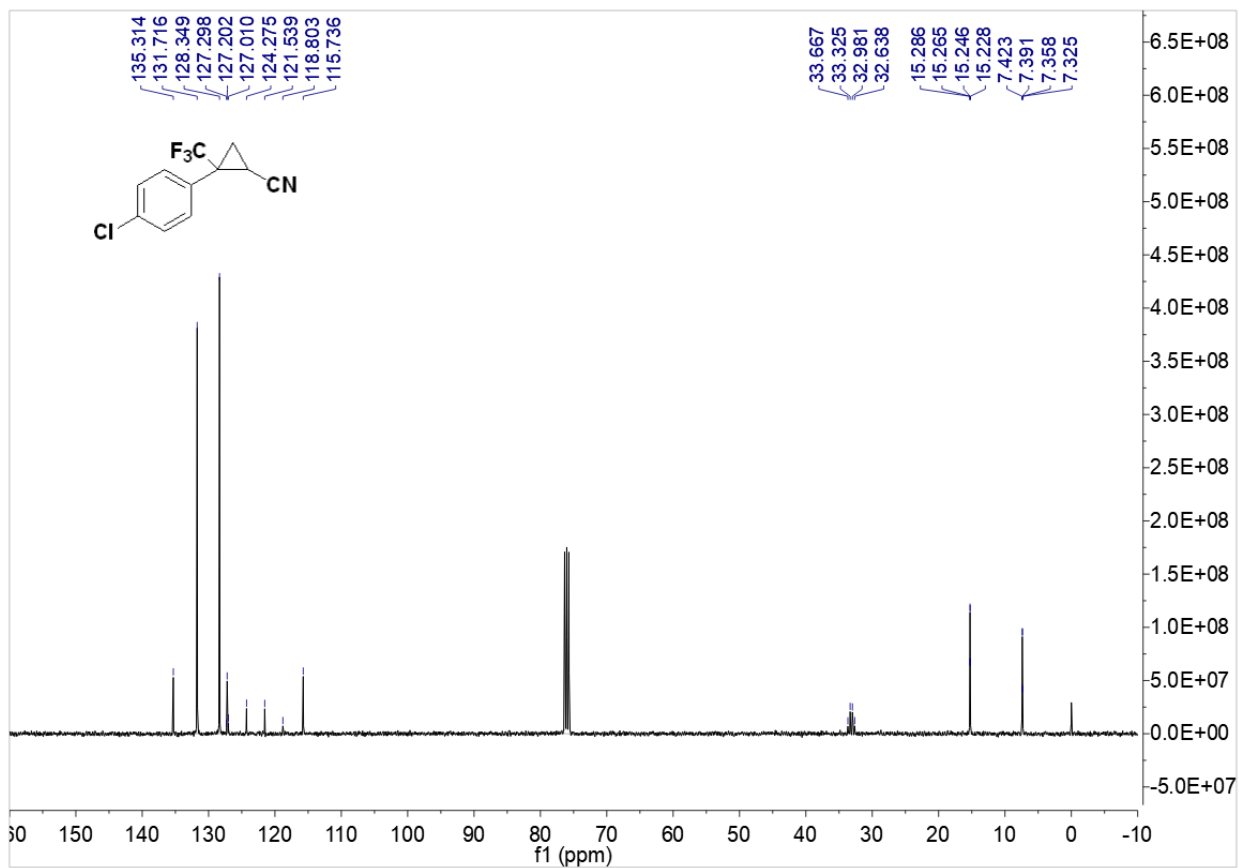

<sup>19</sup>F NMR spectrum of *trans*-3ca

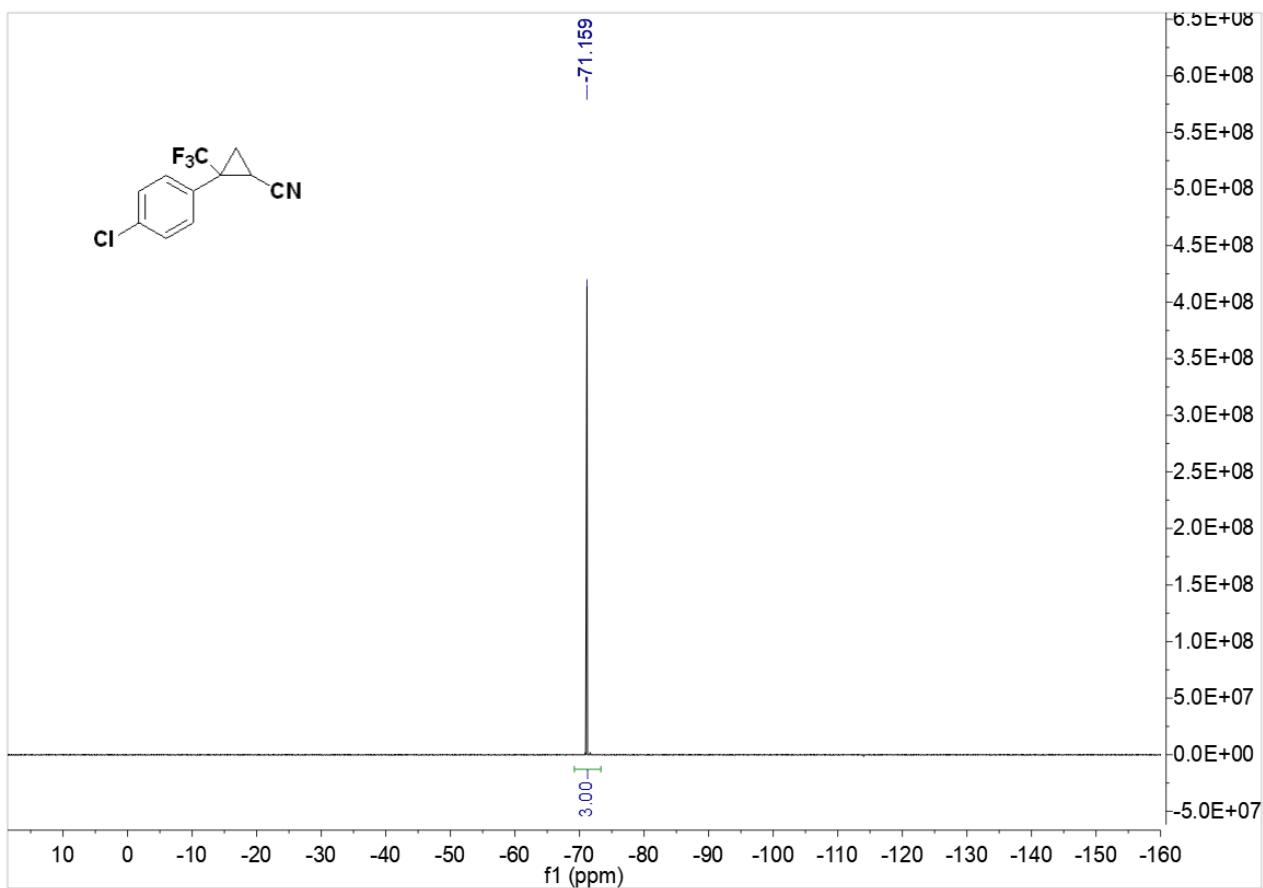

HRMS (EI) spectrum of *trans*-3ca

CS-DYP-245

20222053 258 (3.838) Cm (258-(53+86))

Waters GCT Premier

TOF MS EI+  
1.76e4

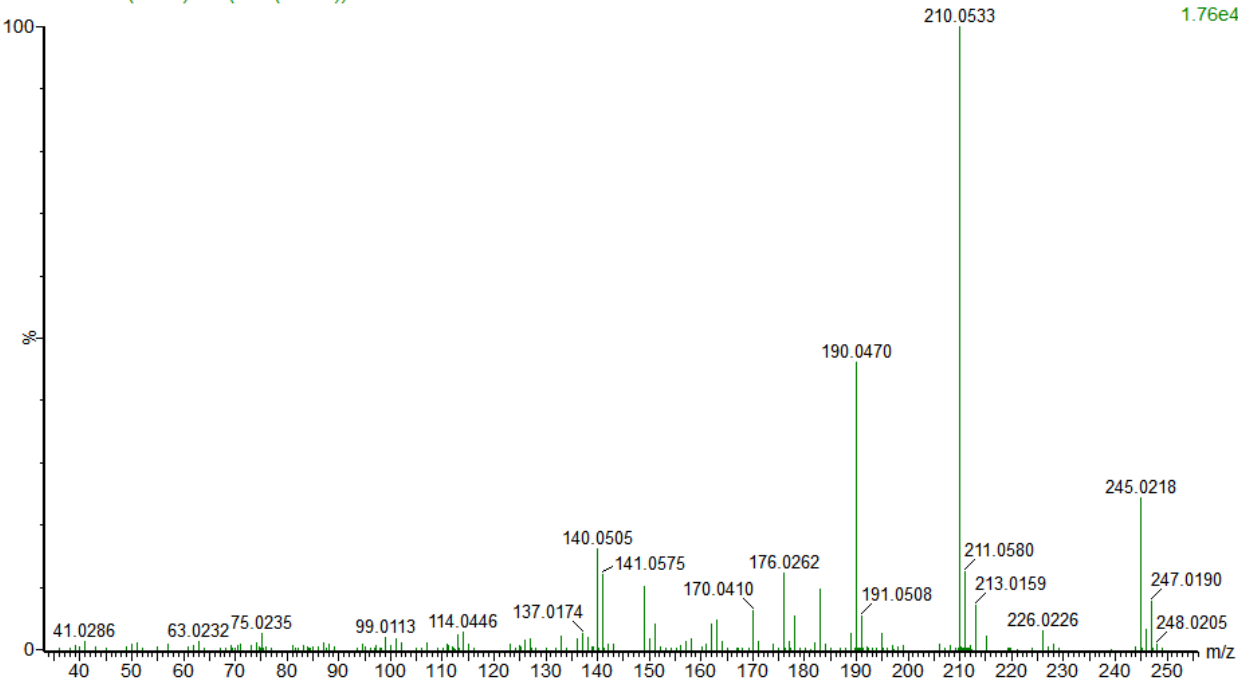

<sup>1</sup>H NMR spectrum of *cis-3ca*

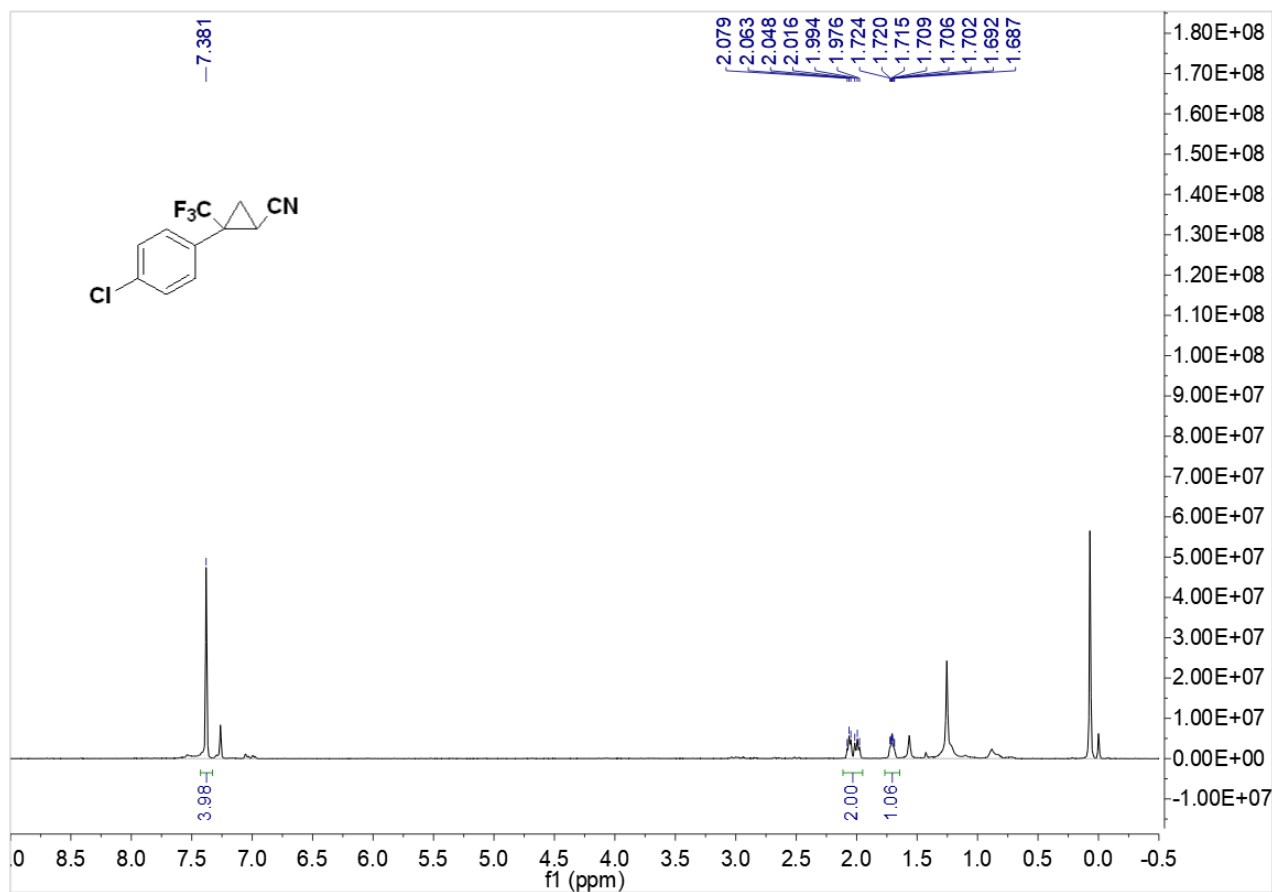

<sup>13</sup>C NMR spectrum of *cis-3ca*

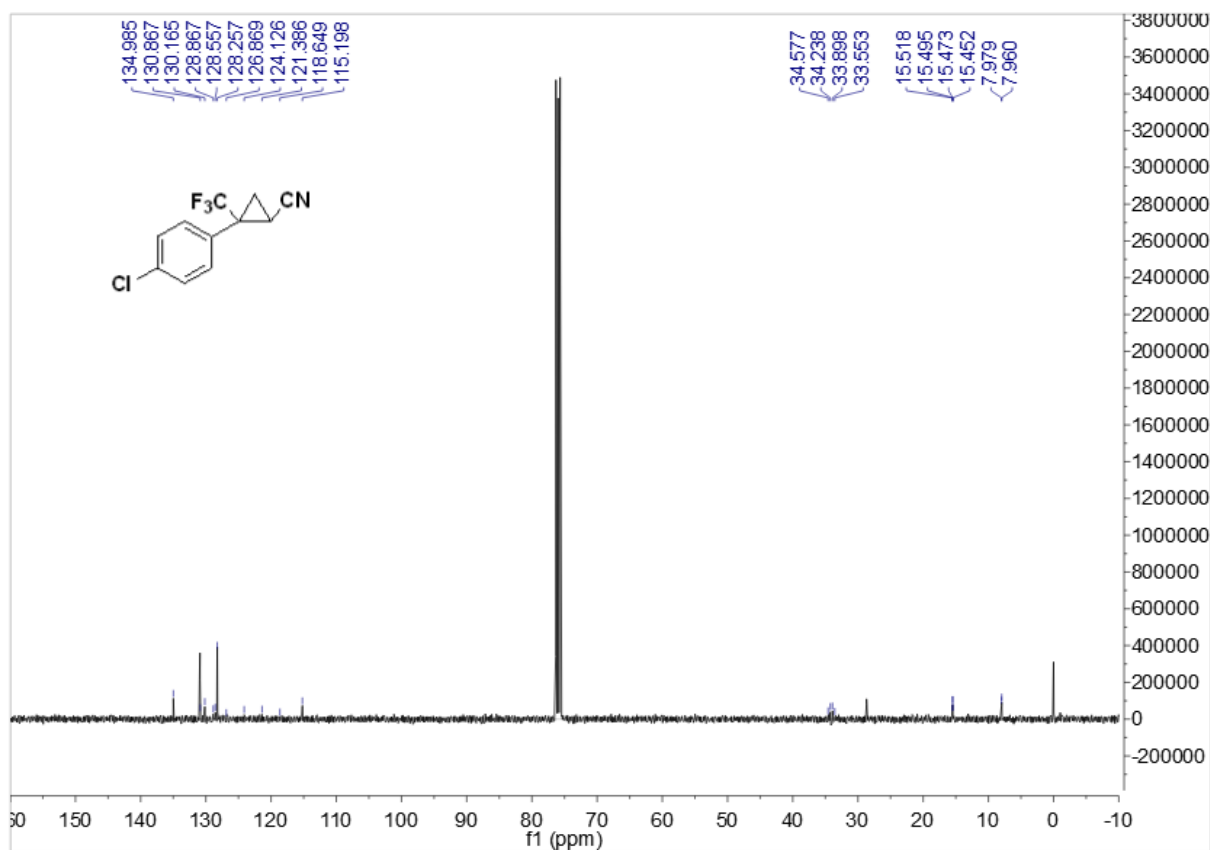

$^{19}\text{F}$  NMR spectrum of *cis*-3ca

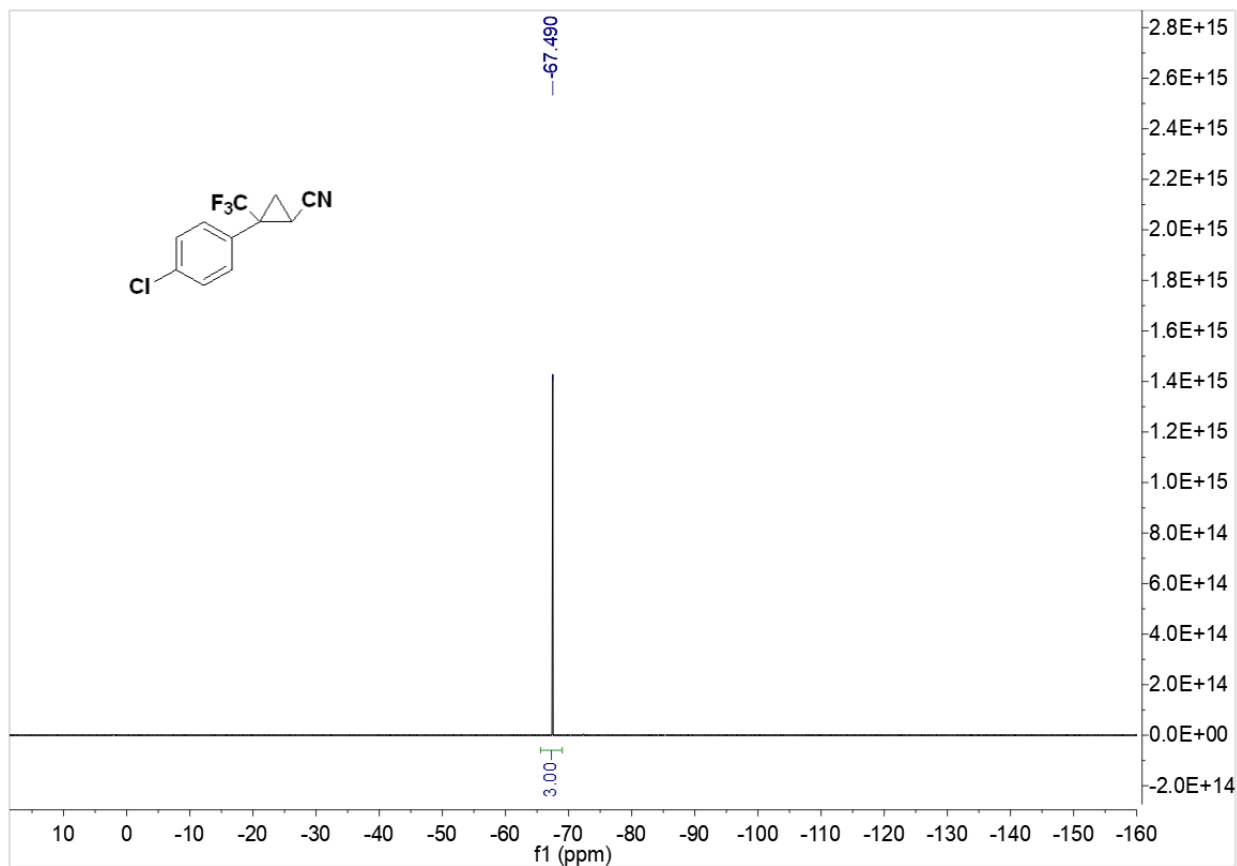

$^1\text{H}$  NMR spectrum of *trans*-3da

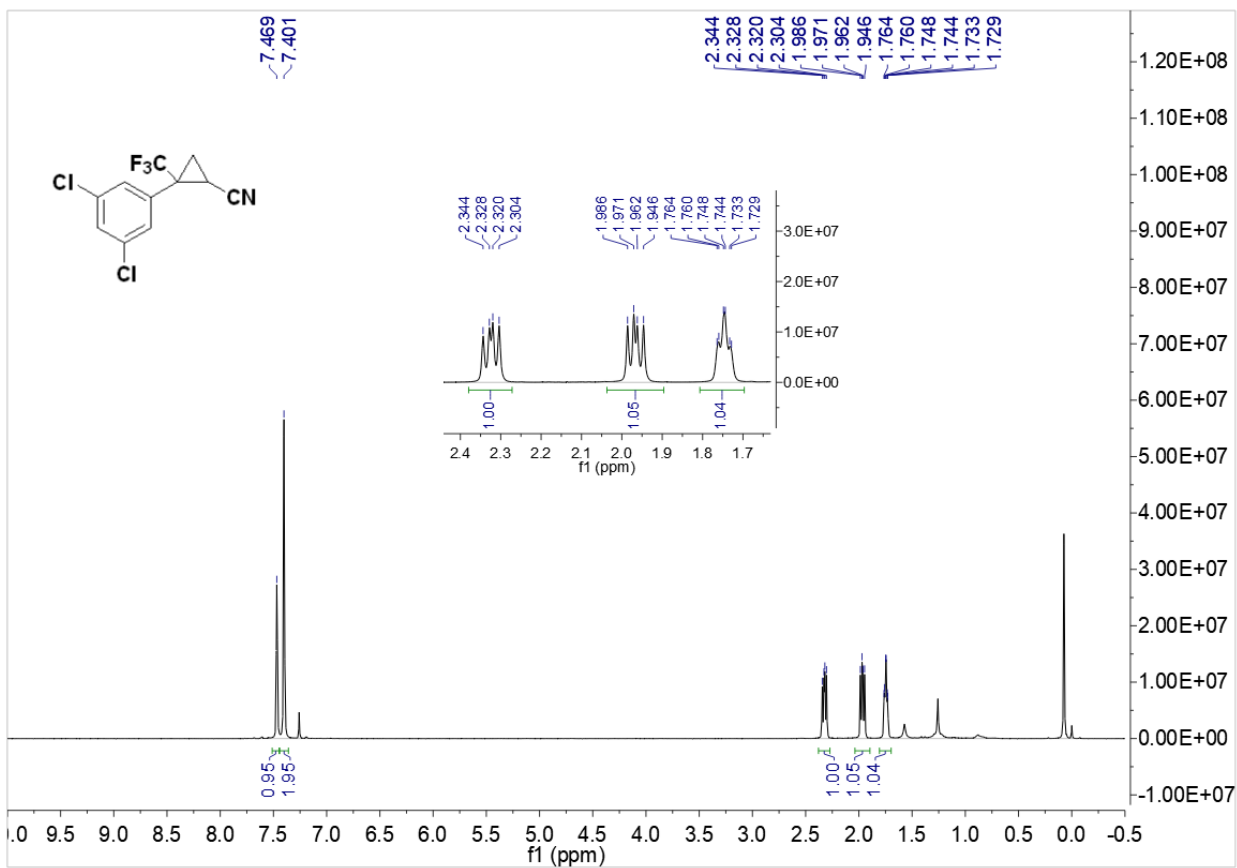

<sup>13</sup>C NMR spectrum of *trans*-3da

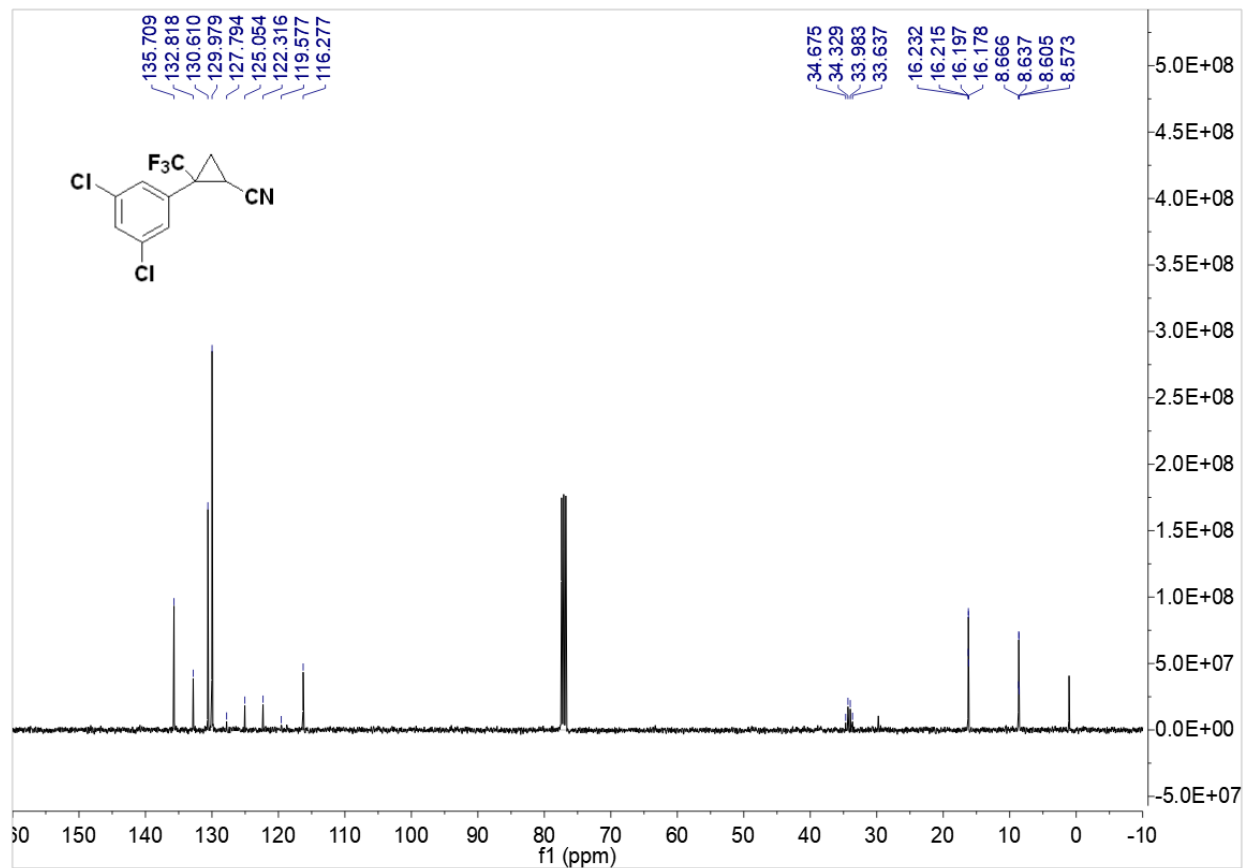

<sup>19</sup>F NMR spectrum of *trans*-3da

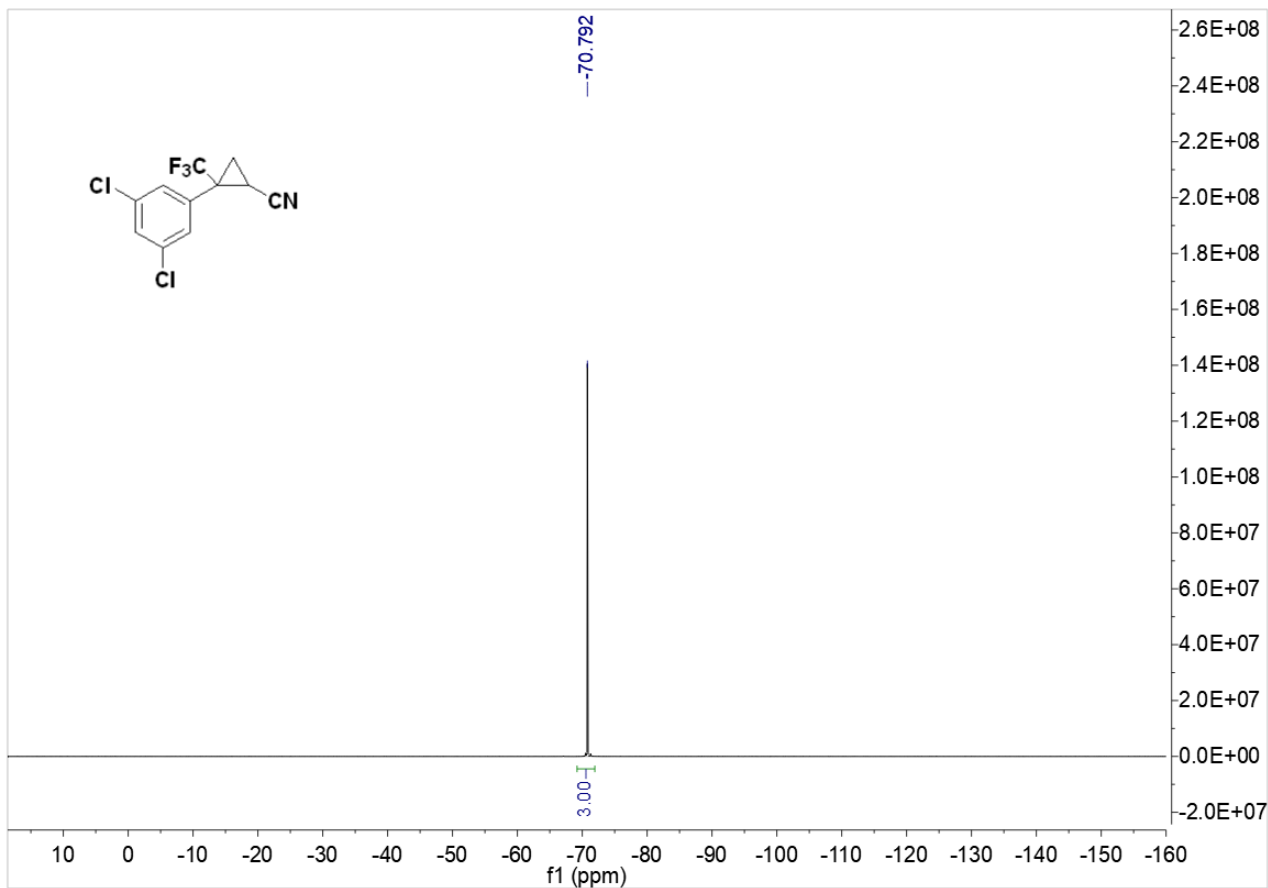

HRMS (EI) spectrum of *trans*-3da

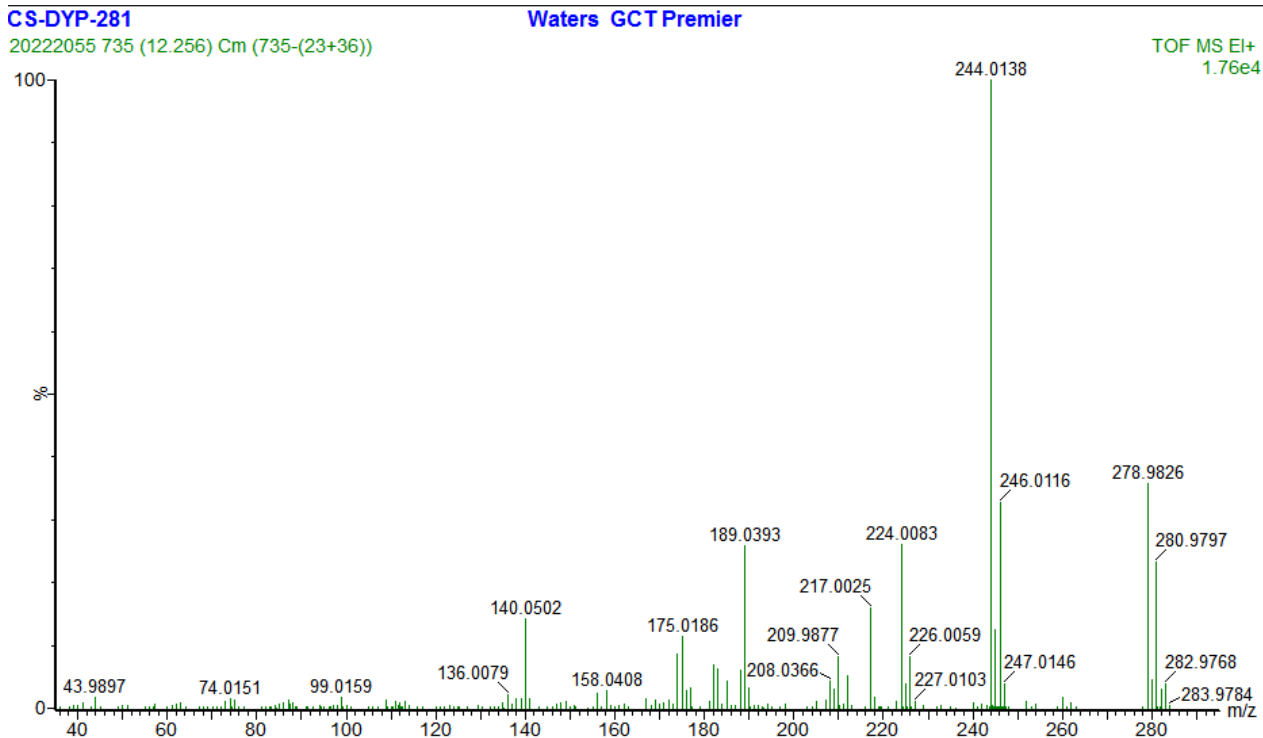

<sup>1</sup>H NMR spectrum of *cis*-3da

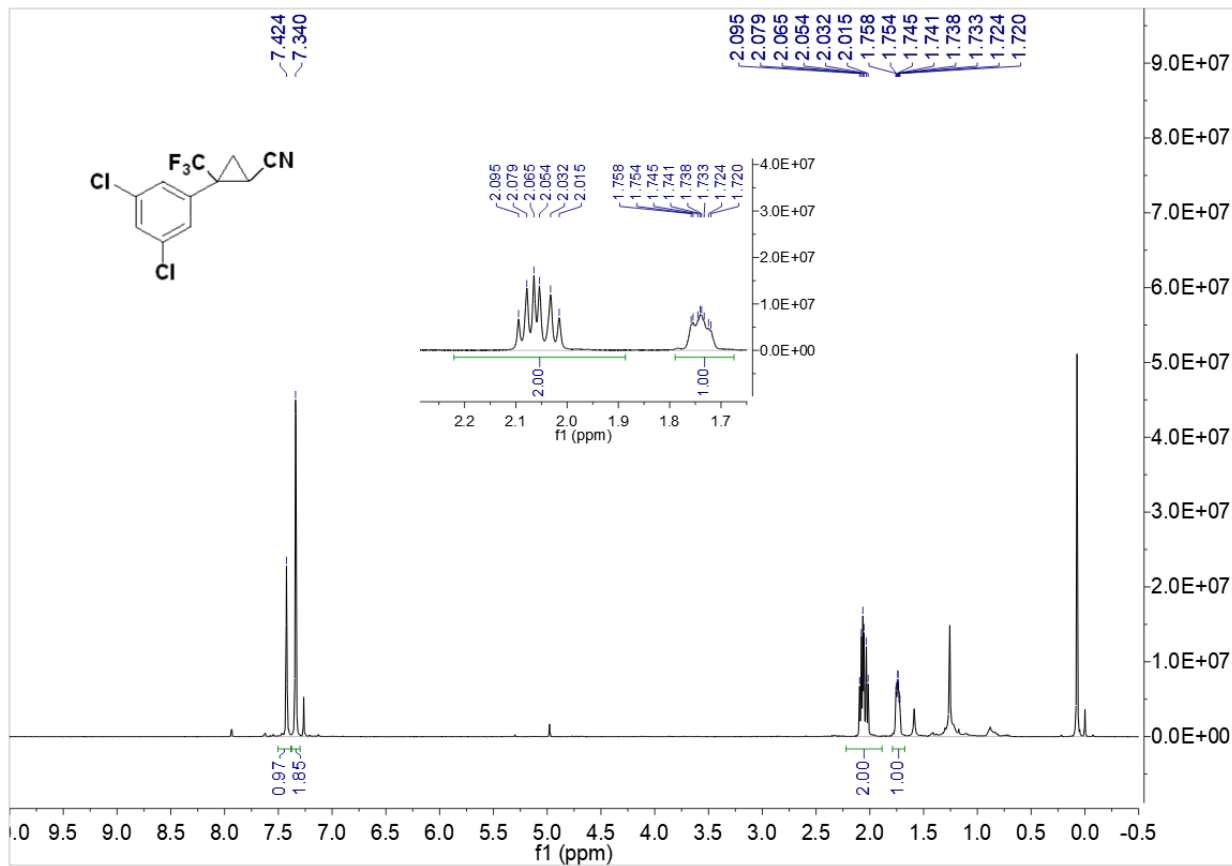

<sup>13</sup>C NMR spectrum of *cis*-3da

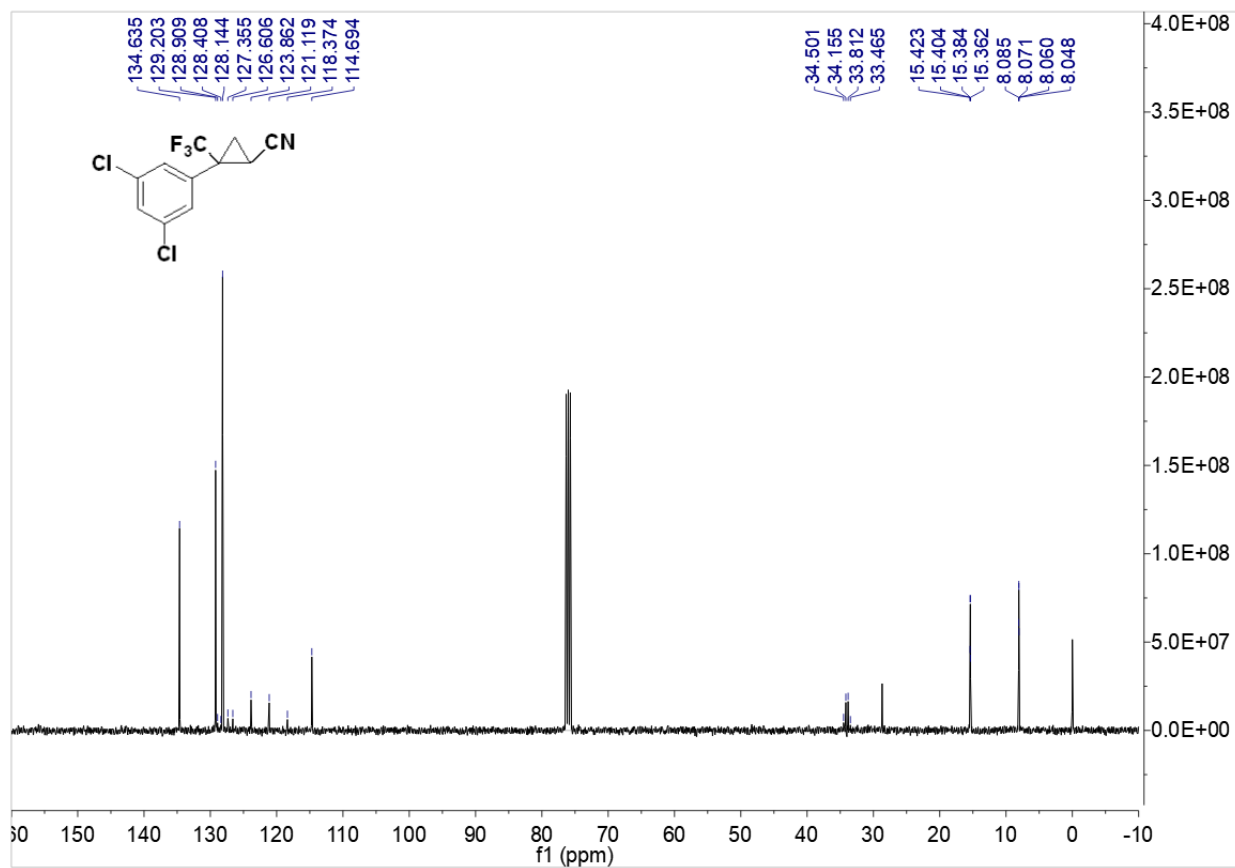

<sup>19</sup>F NMR spectrum of *cis*-3da

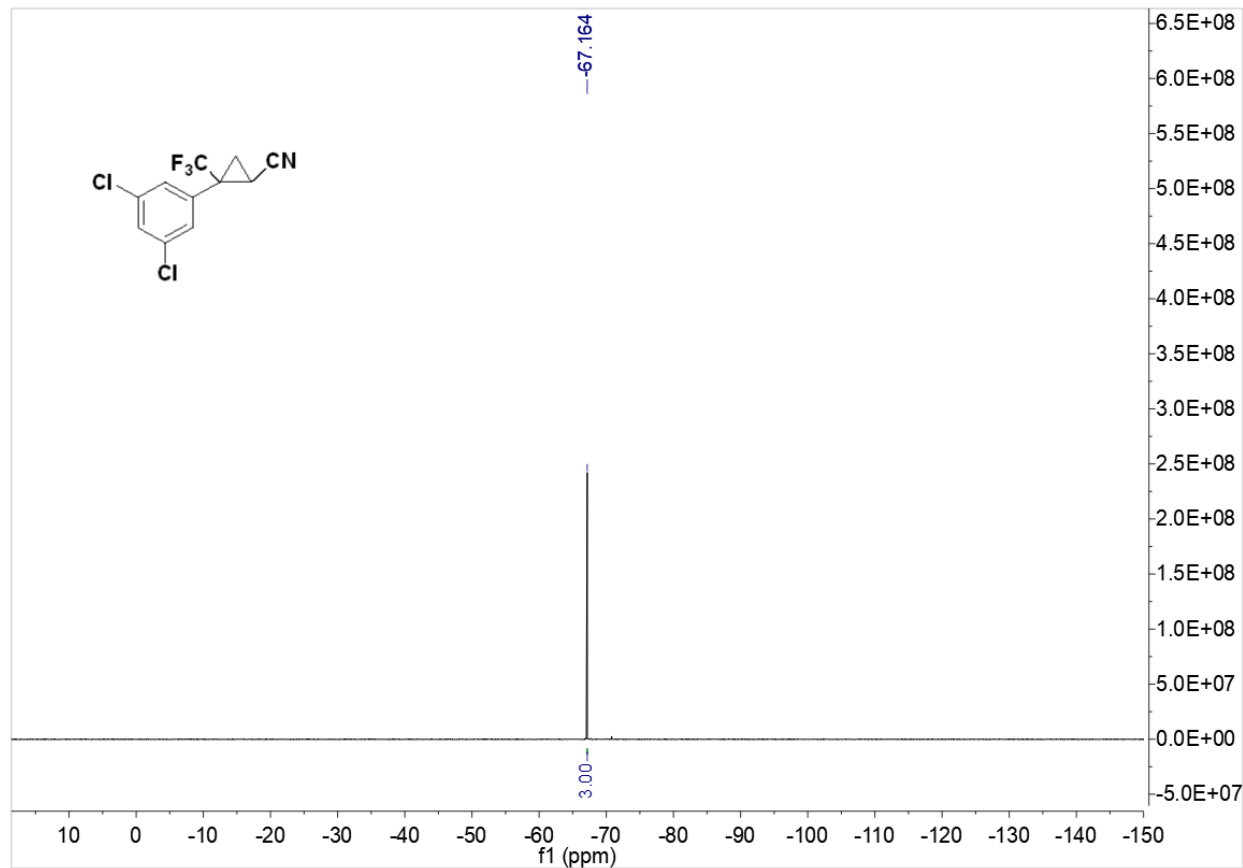



$^1\text{H}$  NMR spectrum of *trans*-3ea

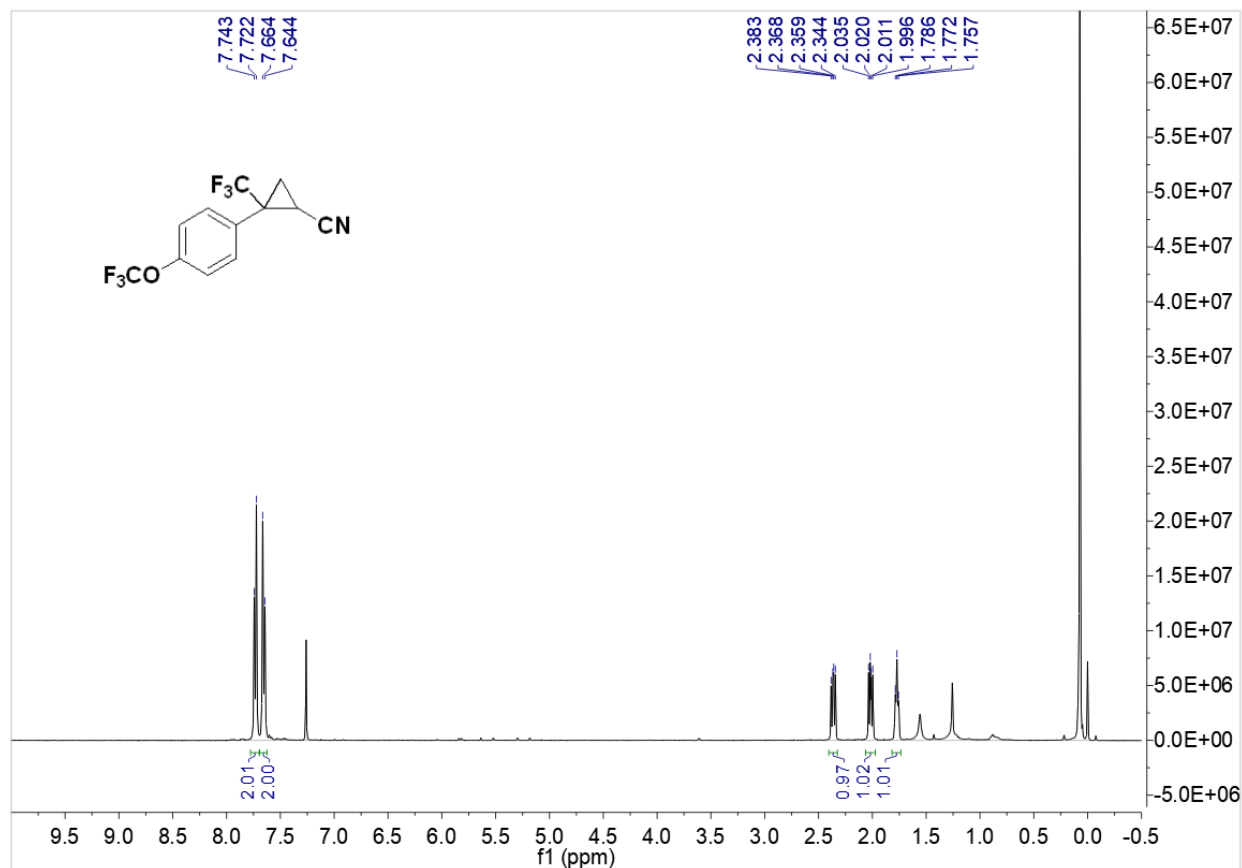

$^{13}\text{C}$  NMR spectrum of *trans*-3ea

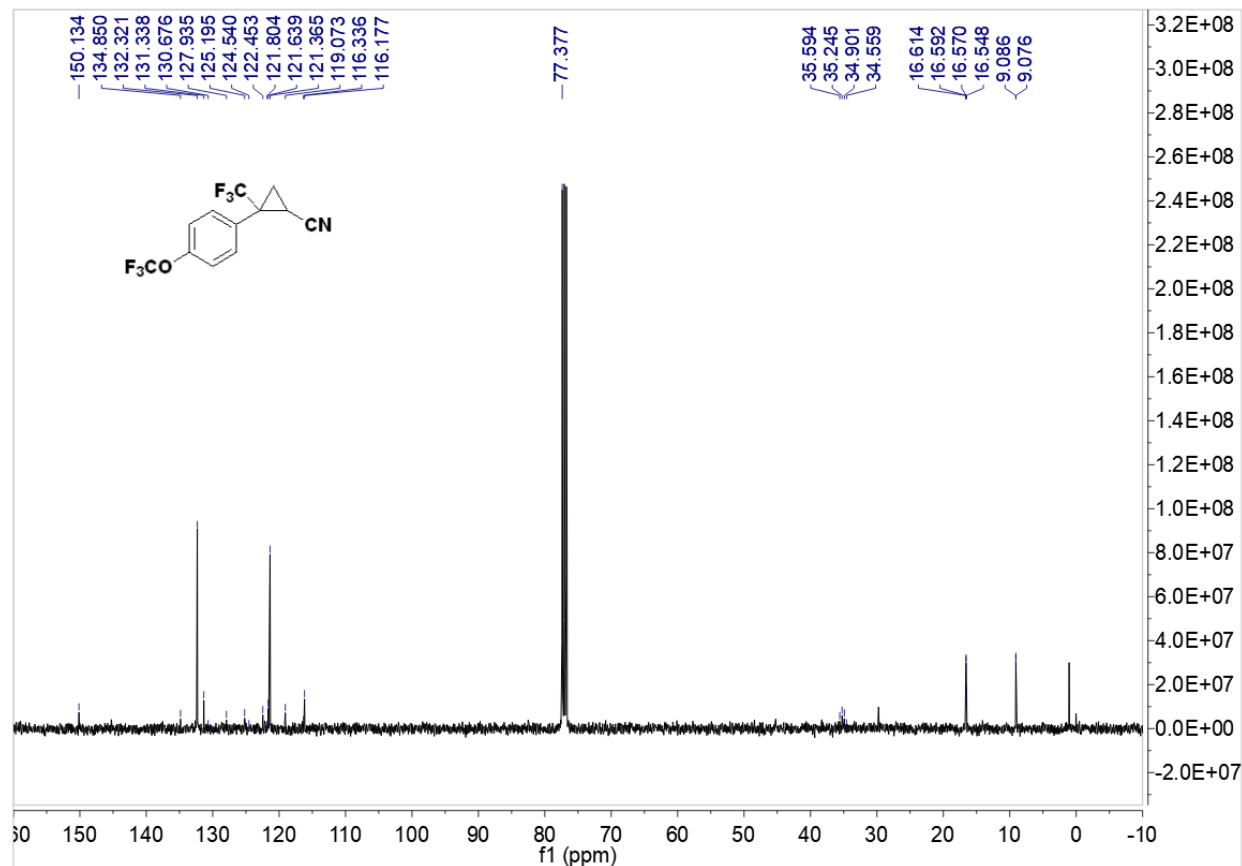

$^{19}\text{F}$  NMR spectrum of *trans*-3ea

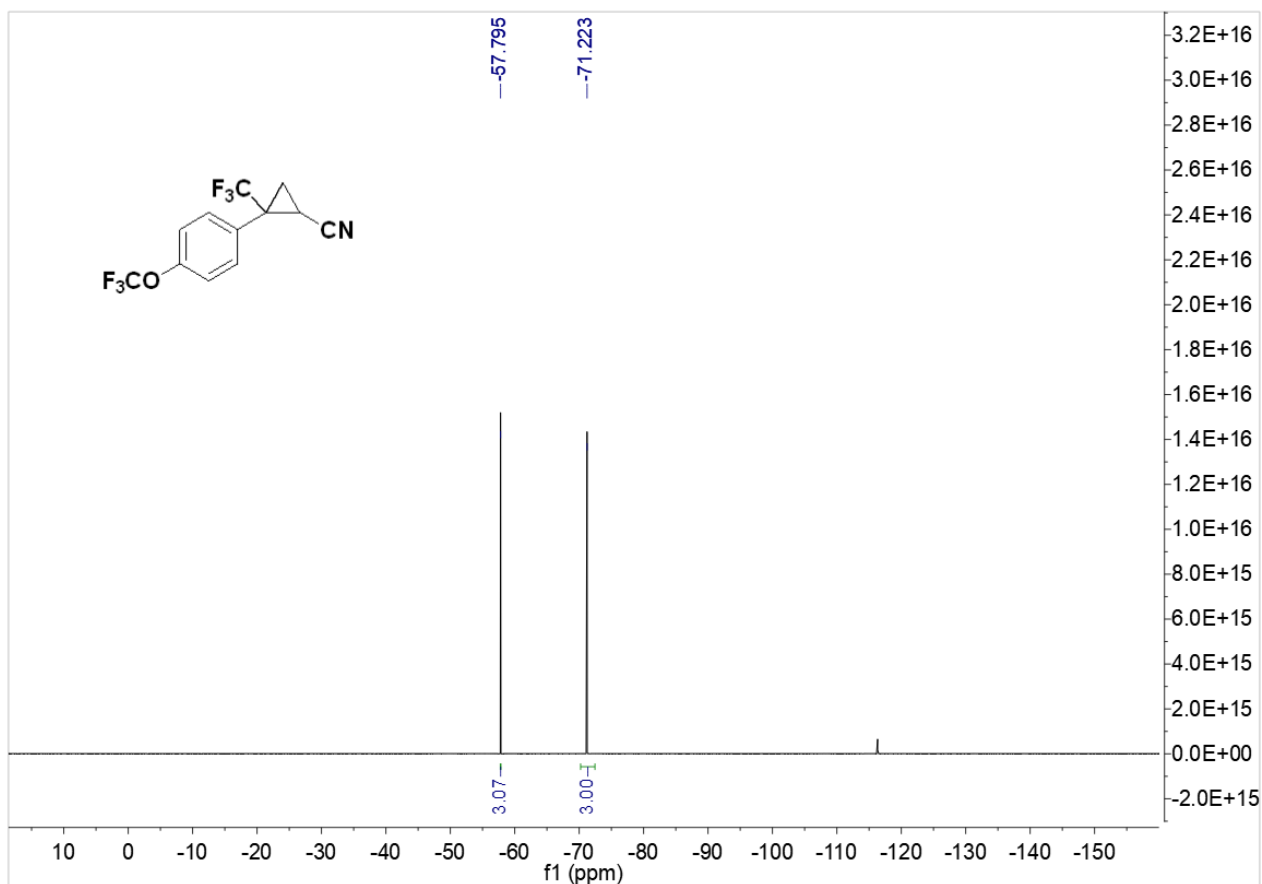

HRMS (EI) spectrum of *trans*-3ea

CS-DYP-295

20222056-1 262 (4.367) Cm (262-(20+49))

Waters GCT Premier

TOF MS EI+  
1.56e4

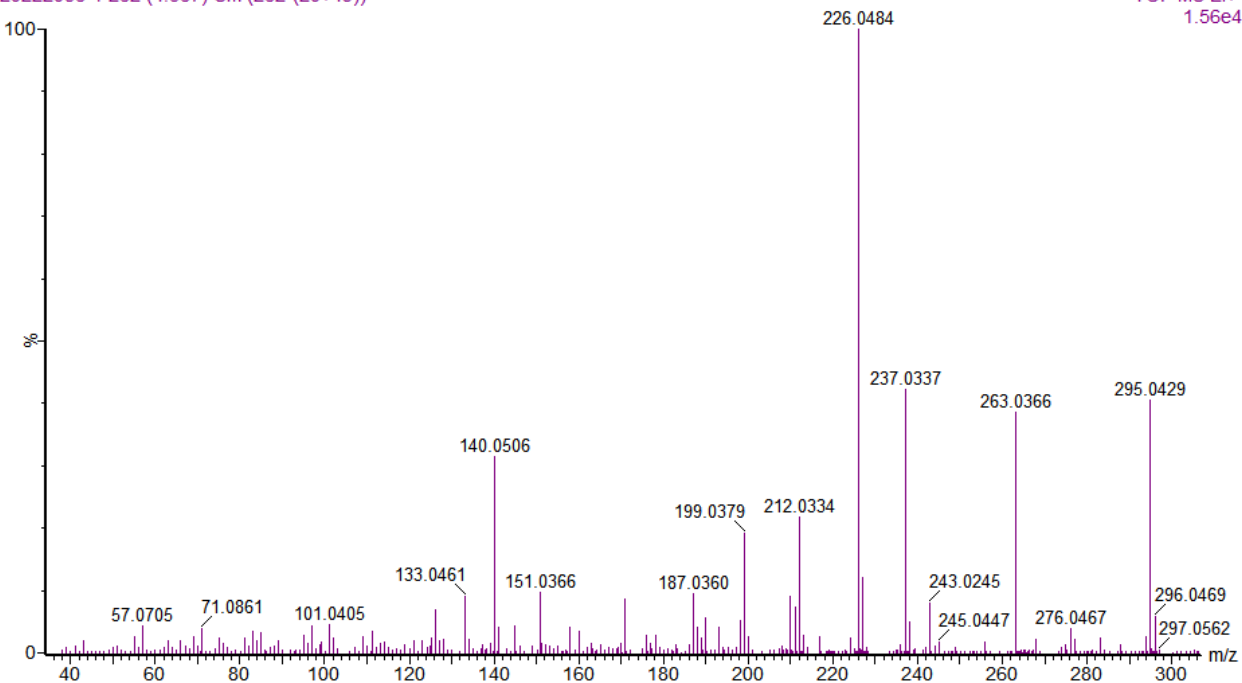

$^1\text{H}$  NMR spectrum of *cis-3ea*

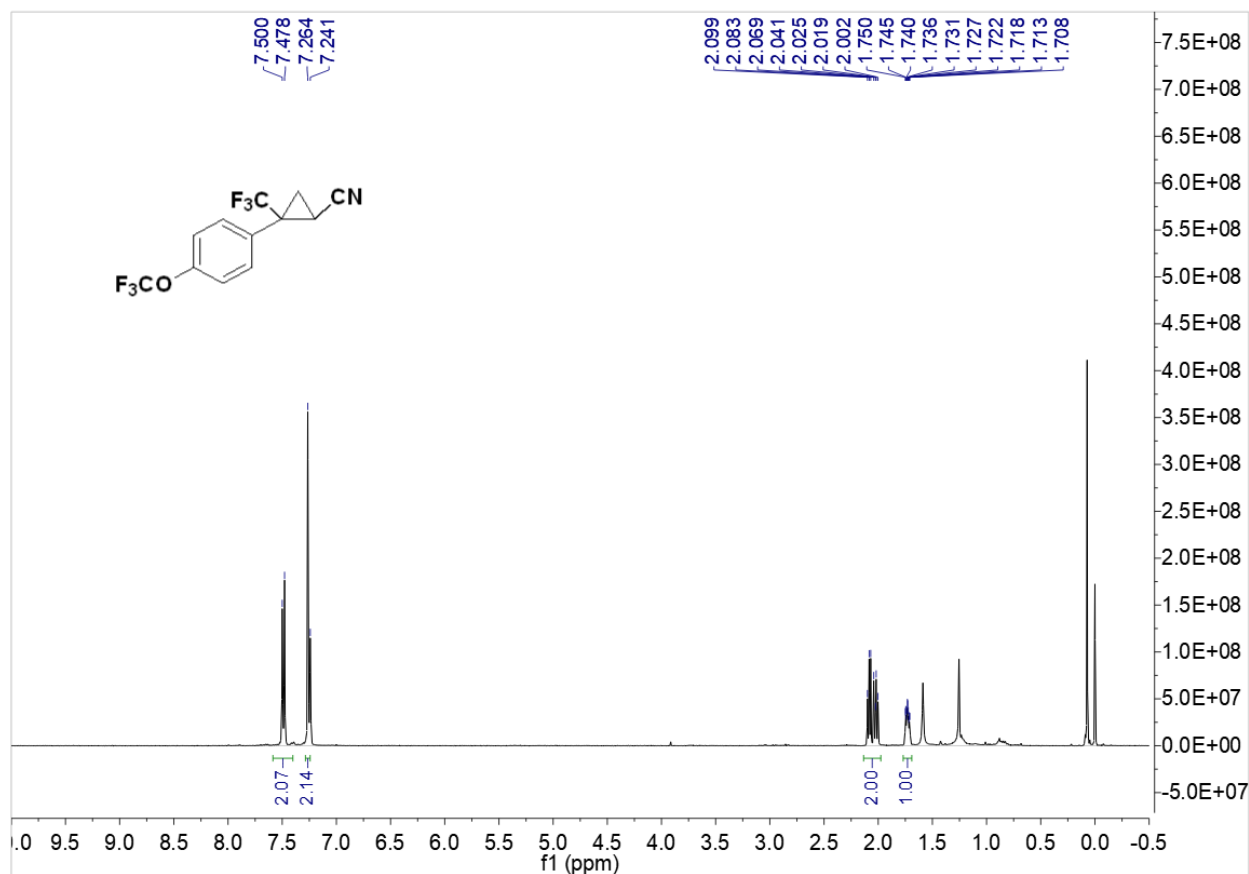

$^{13}\text{C}$  NMR spectrum of *cis-3ea*

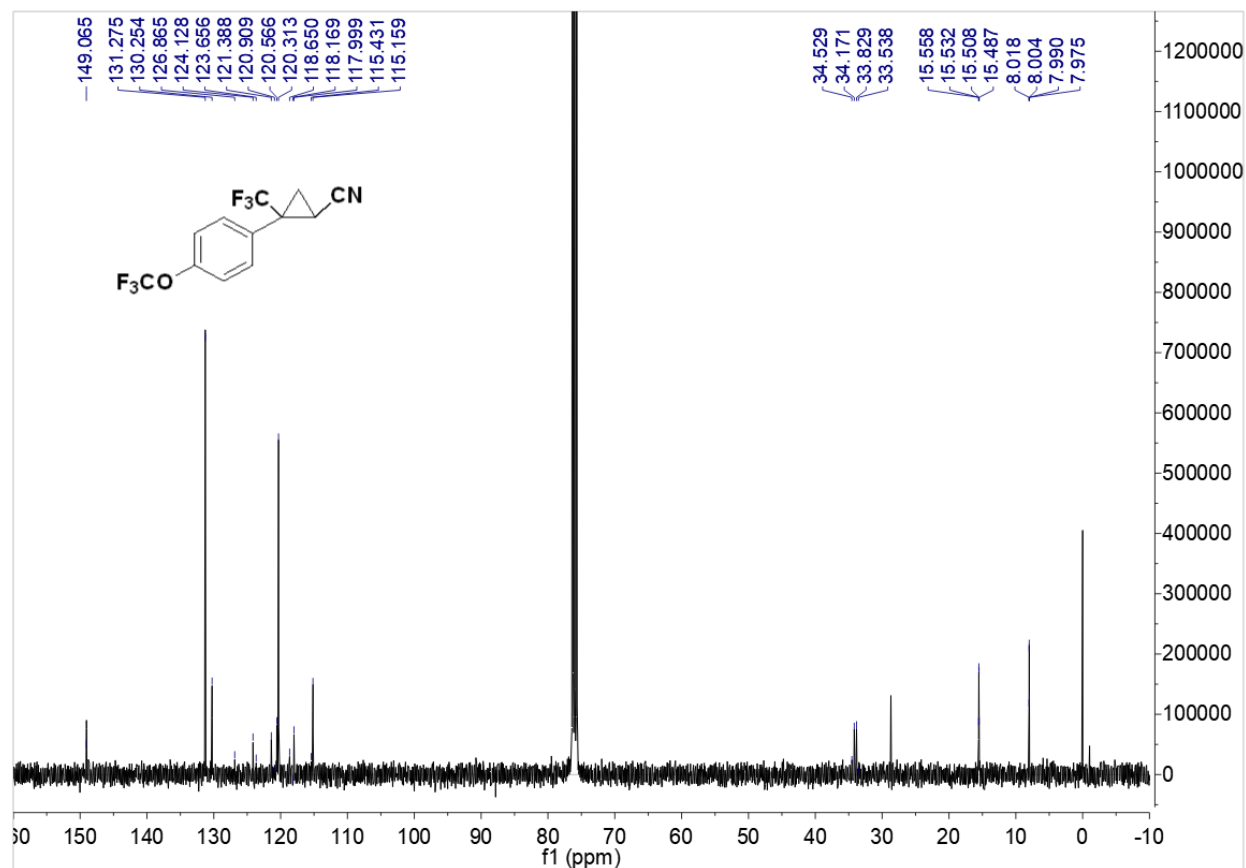

$^{19}\text{F}$  NMR spectrum of *cis*-3ea

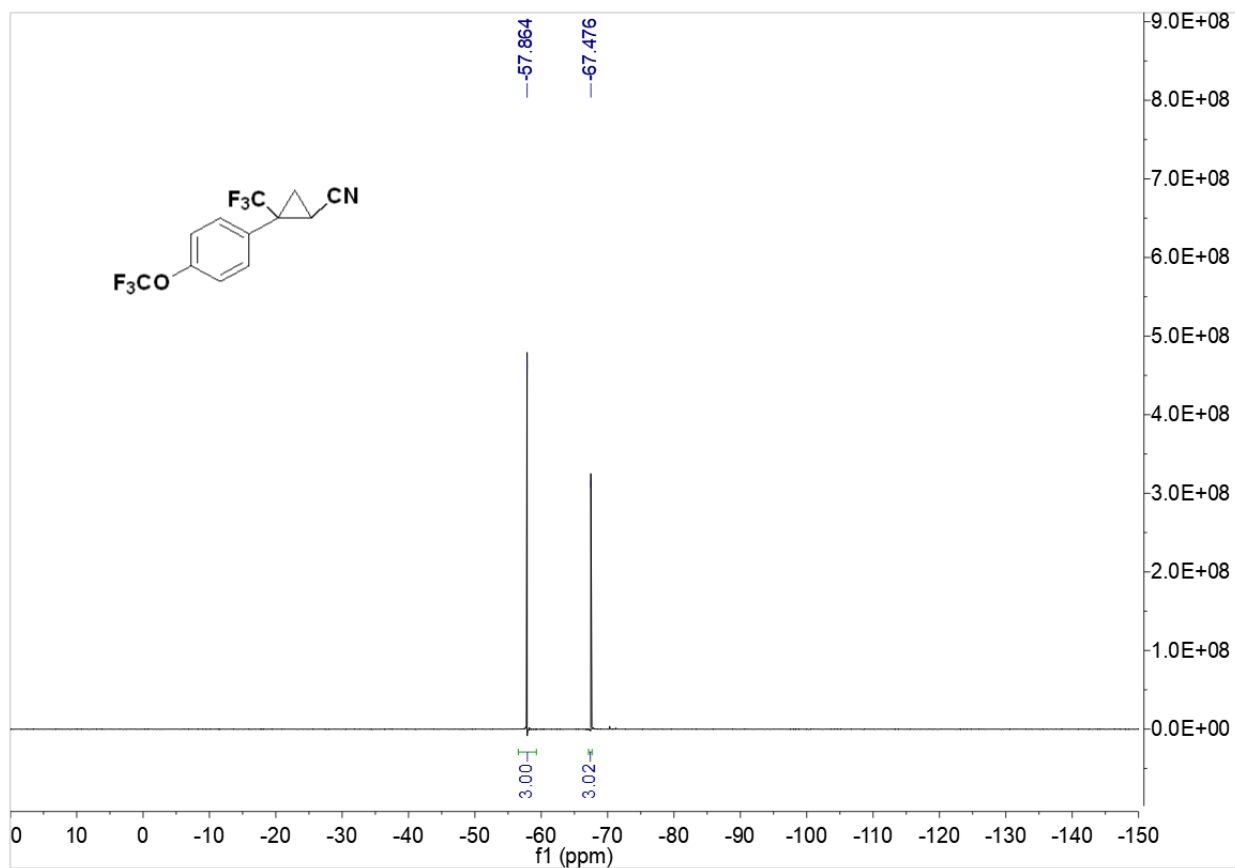

$^1\text{H}$  NMR spectrum of *trans*-3fa

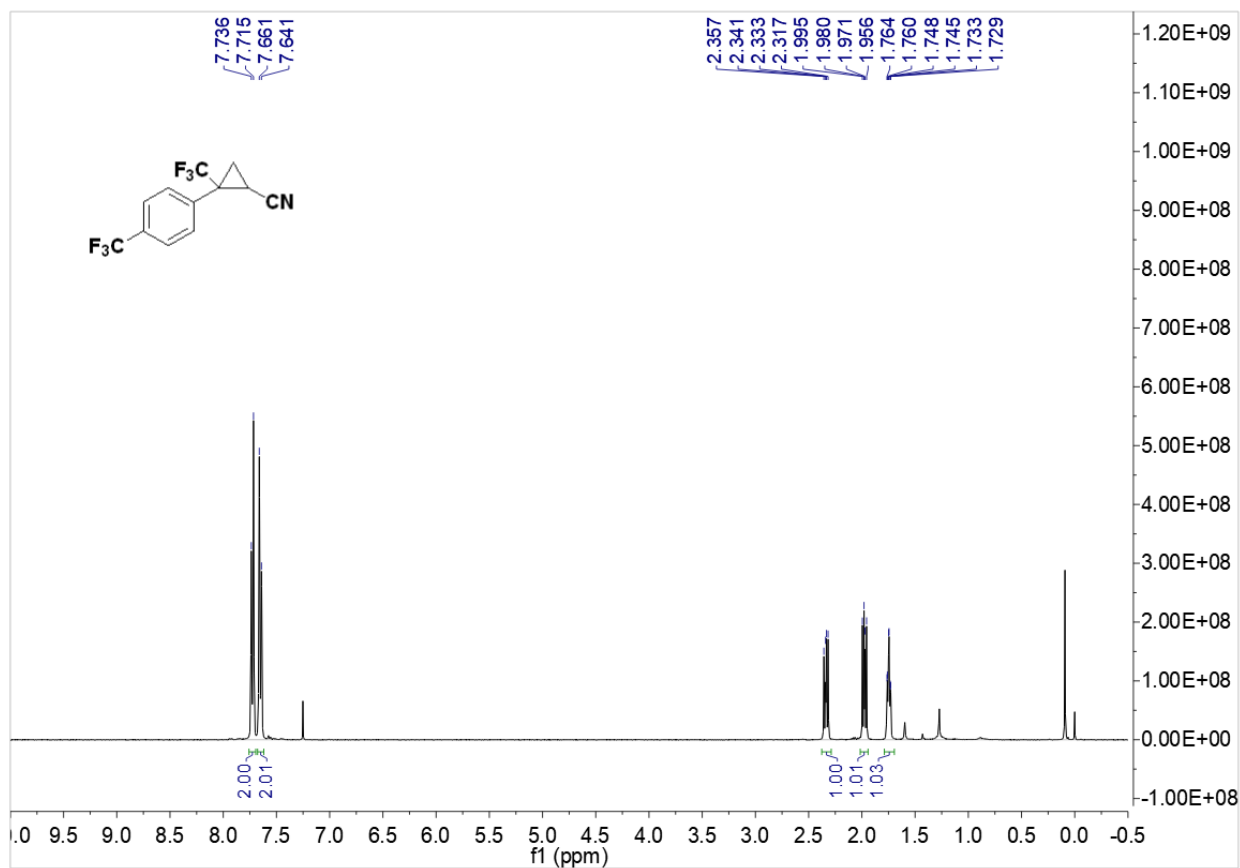

$^{13}\text{C}$  NMR spectrum of *trans*-3fa

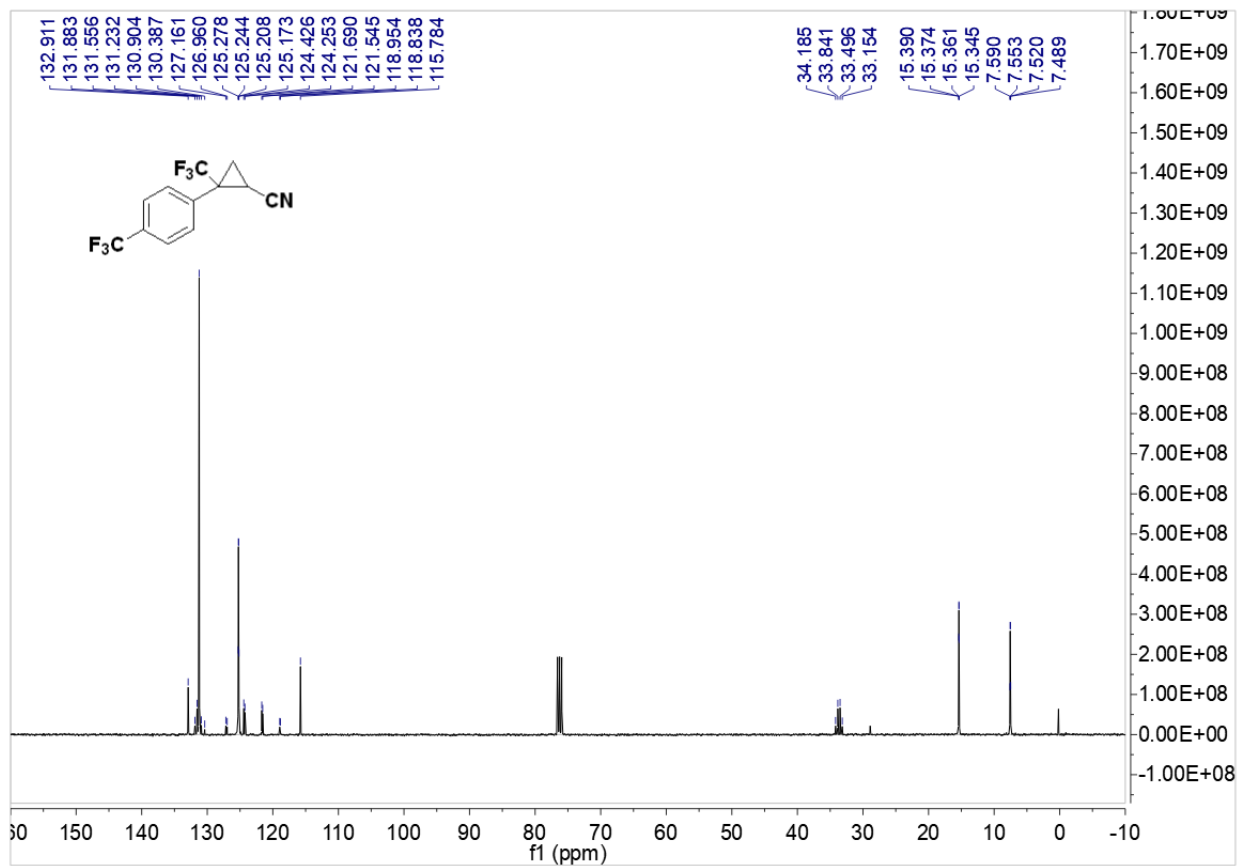

$^{19}\text{F}$  NMR spectrum of *trans*-3fa

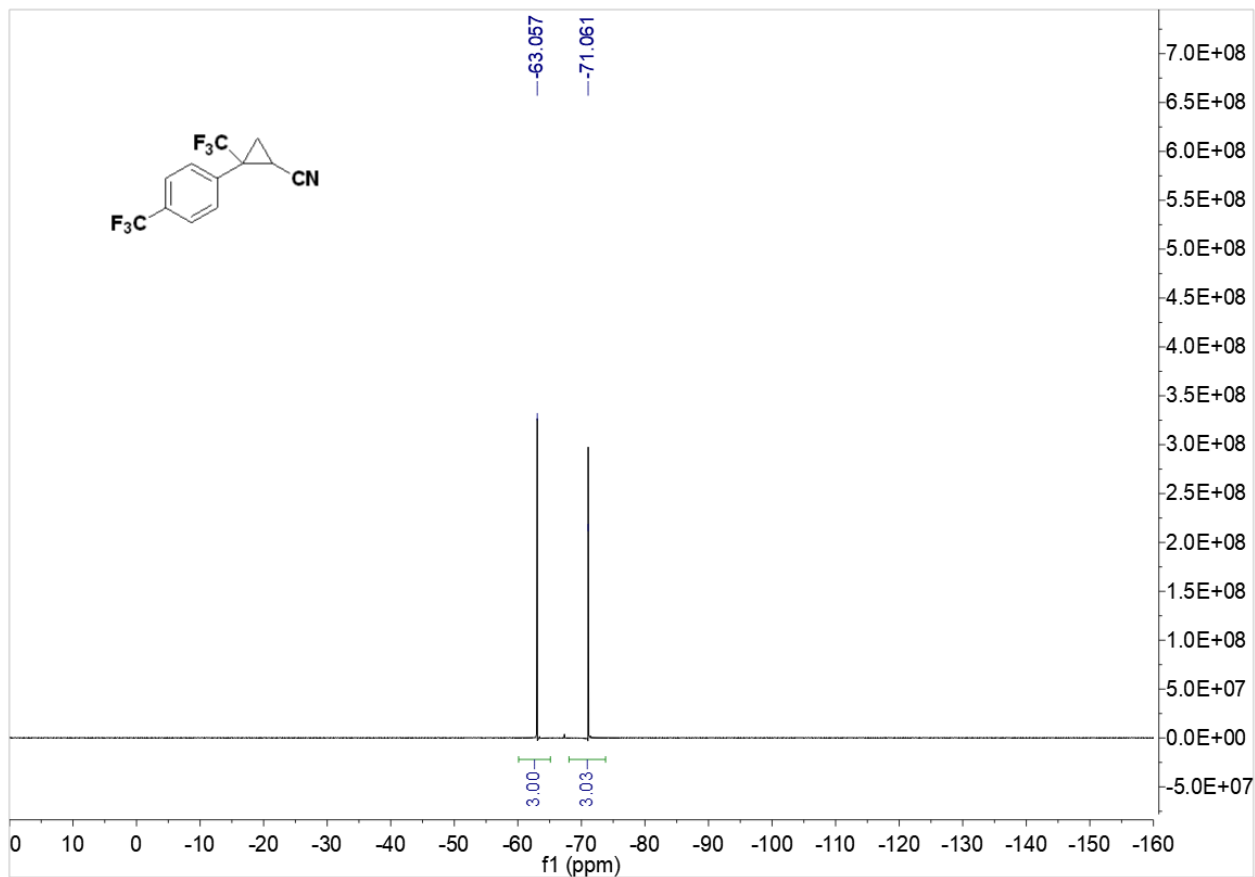

HRMS (EI) spectrum of *trans*-3fa

CS-DYP-279

20222033 237 (3.950) Cm (237-(15+23))

Waters GCT Premier

TOF MS EI+  
1.67e4

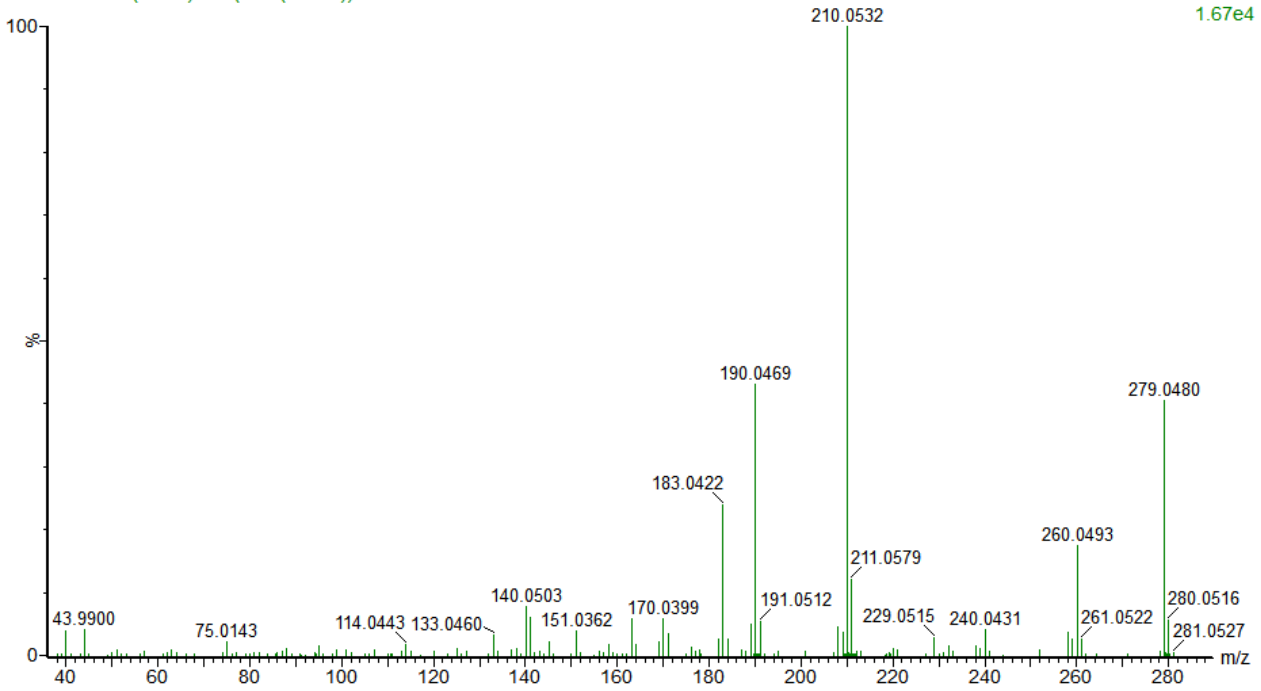

<sup>1</sup>H NMR spectrum of *cis*-3fa

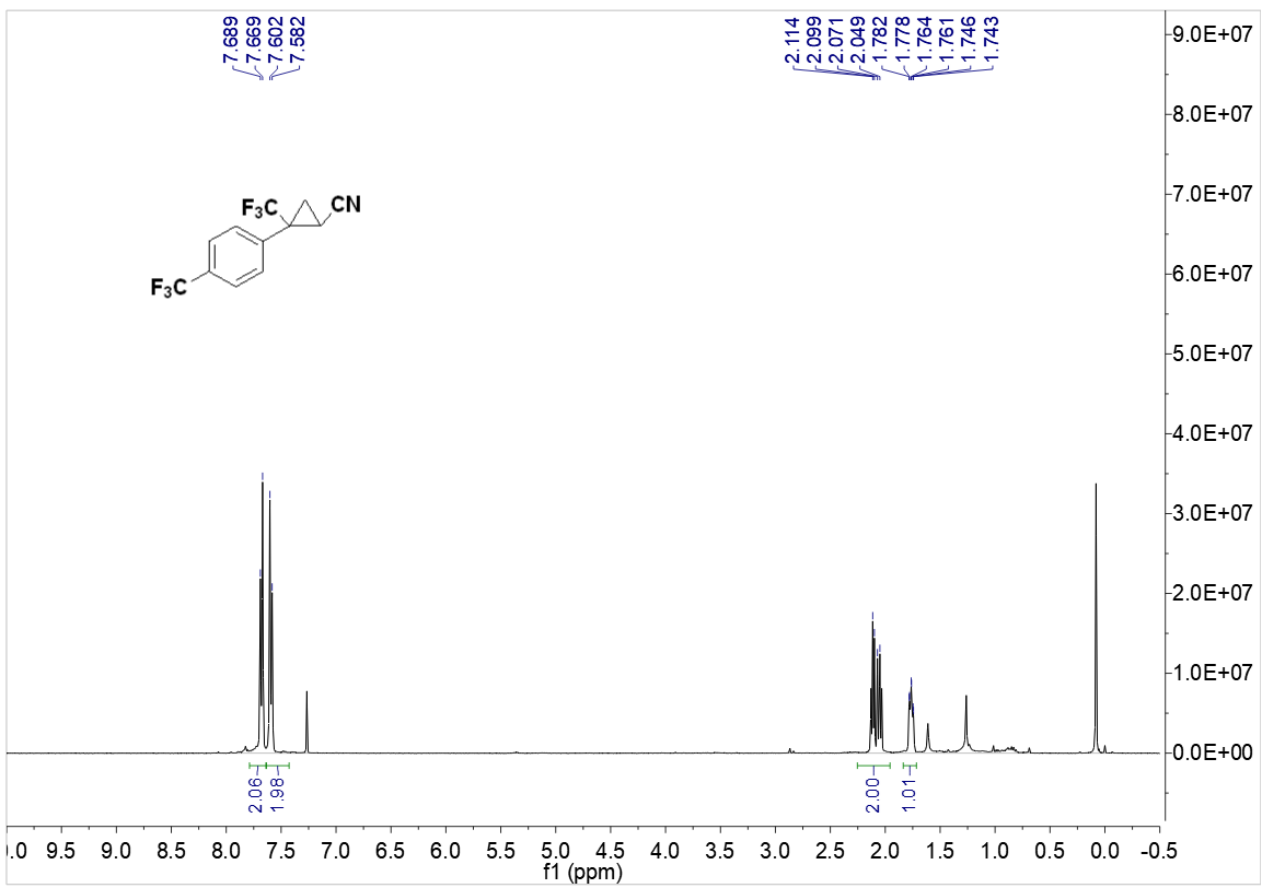

<sup>13</sup>C NMR spectrum of *cis-3fa*

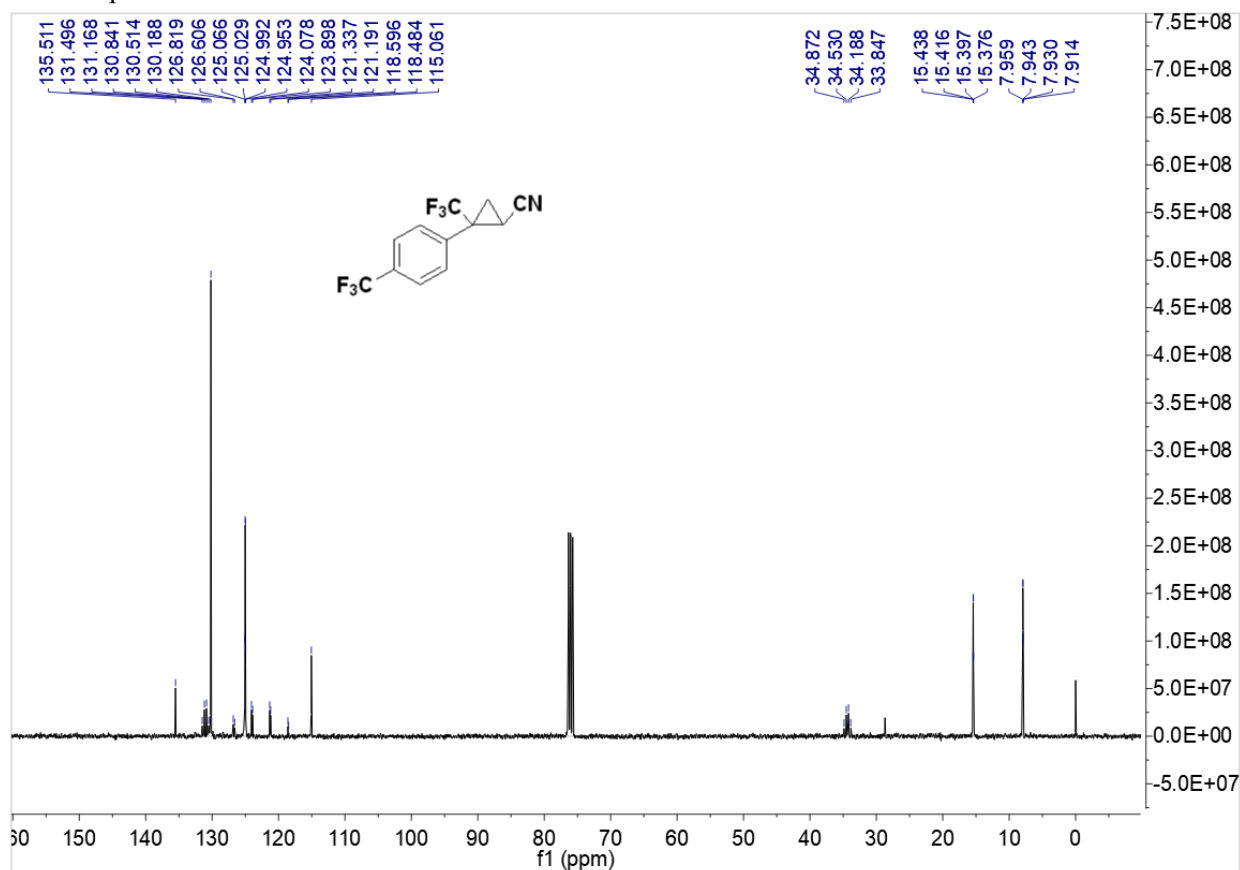

<sup>19</sup>F NMR spectrum of *cis-3fa*

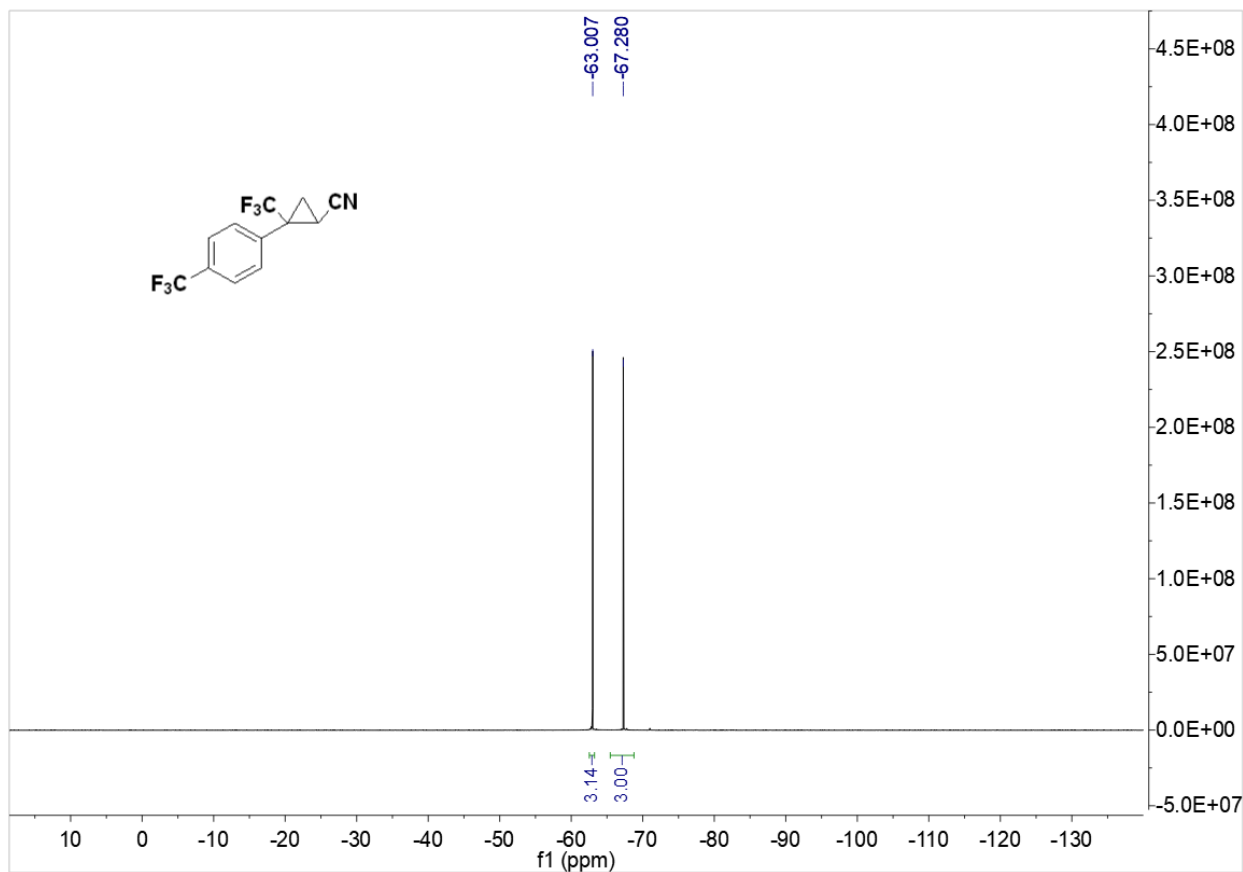

<sup>1</sup>H NMR spectrum of *trans*-3ga

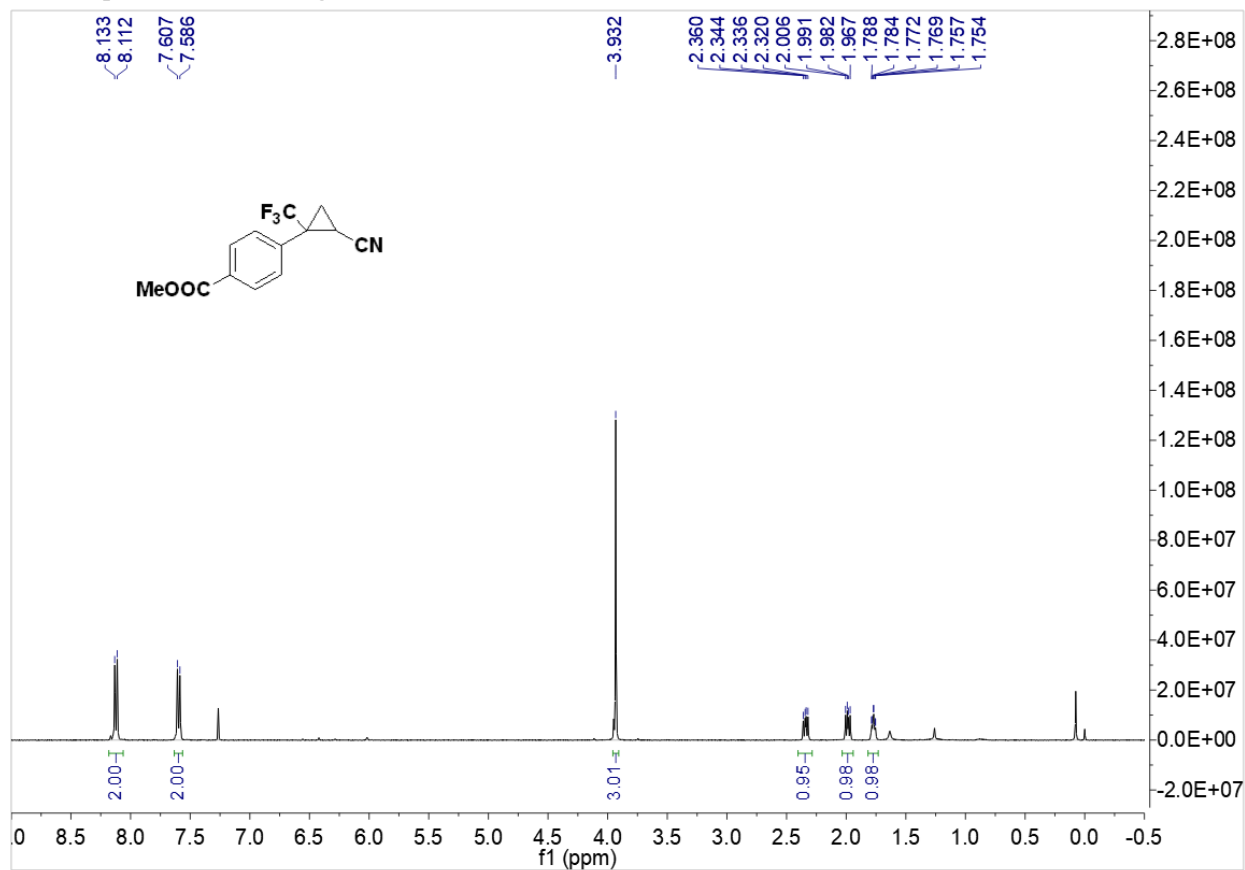

<sup>13</sup>C NMR spectrum of *trans*-3ga

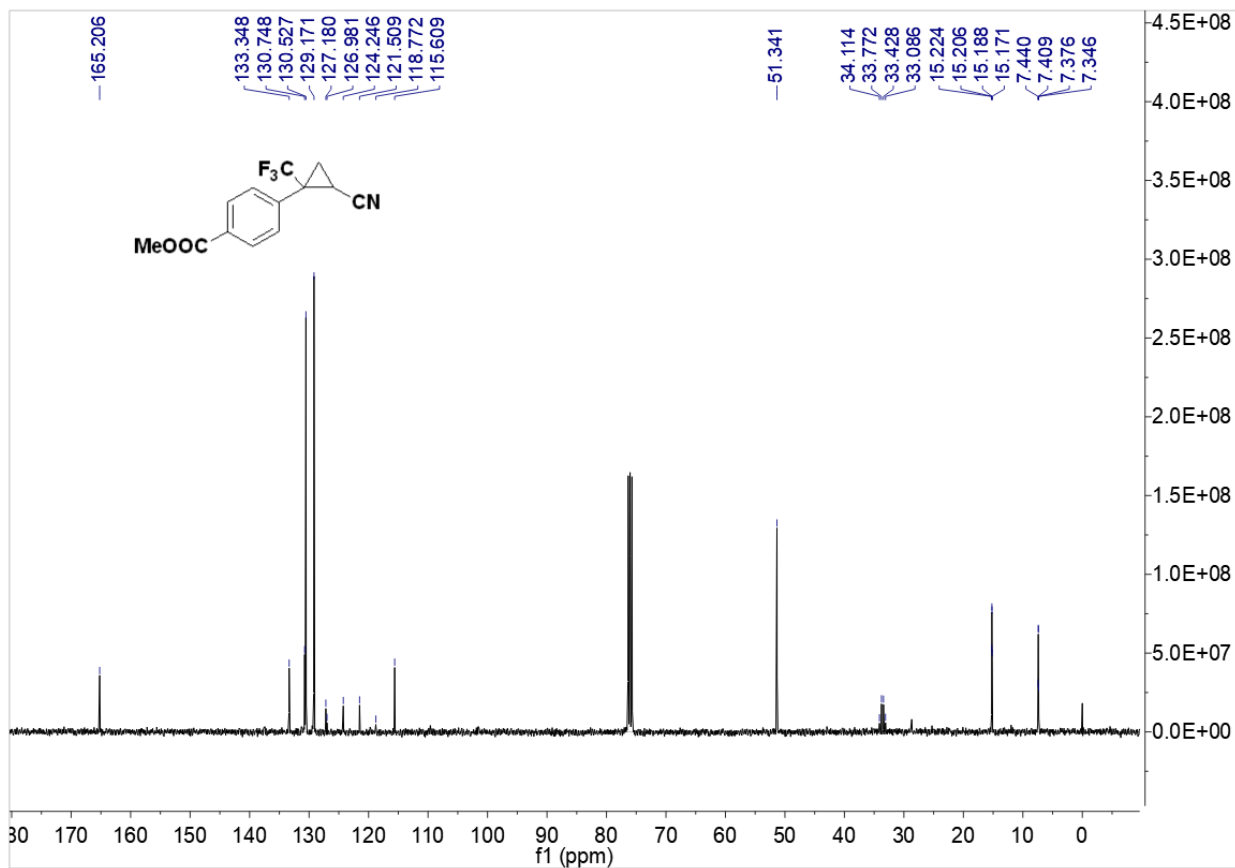



<sup>19</sup>F NMR spectrum of *trans*-3ga

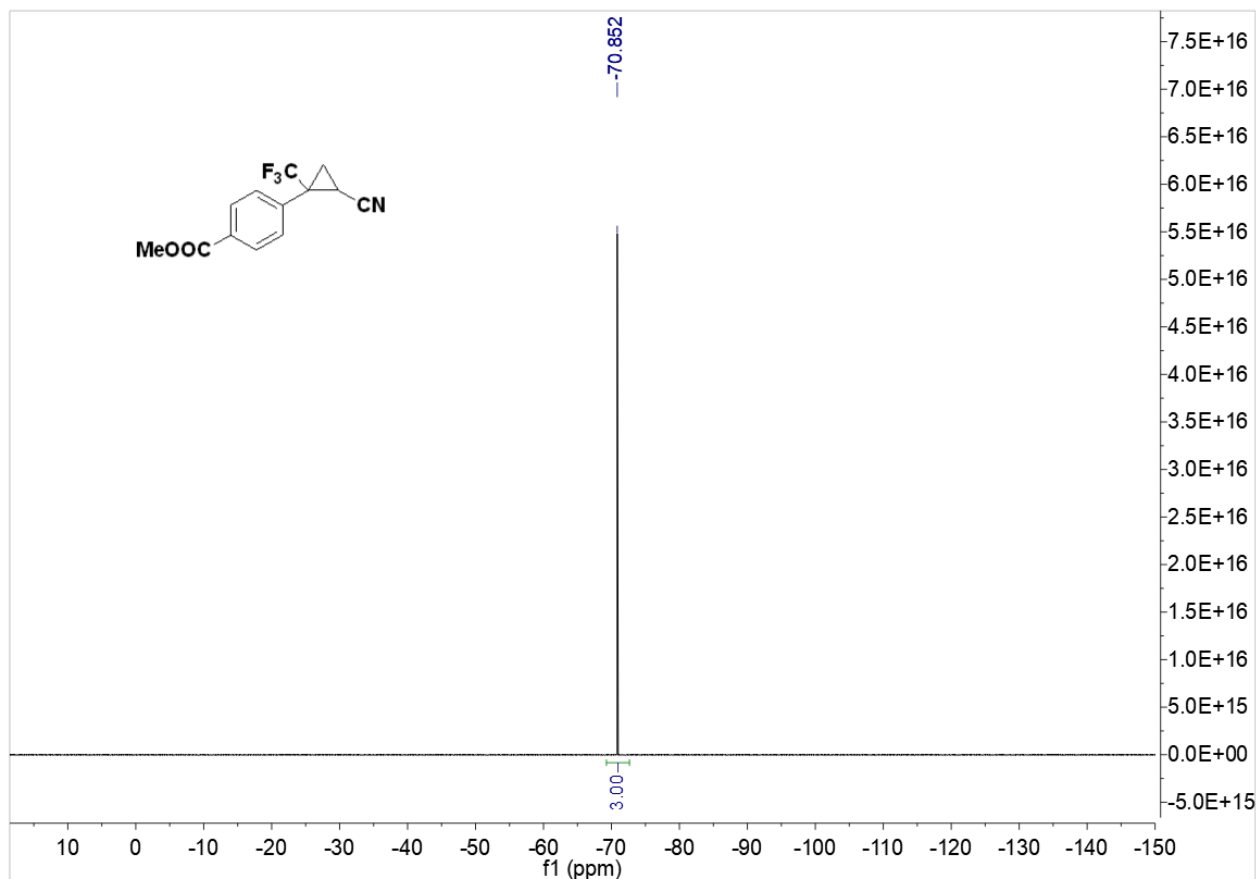

HRMS (EI) spectrum of *trans*-3ga

3S-HJJ-269

Waters GCT Premier

TOF MS EI+  
1.72e4

20221719 162 (2.700) Cm (162-(33+62))

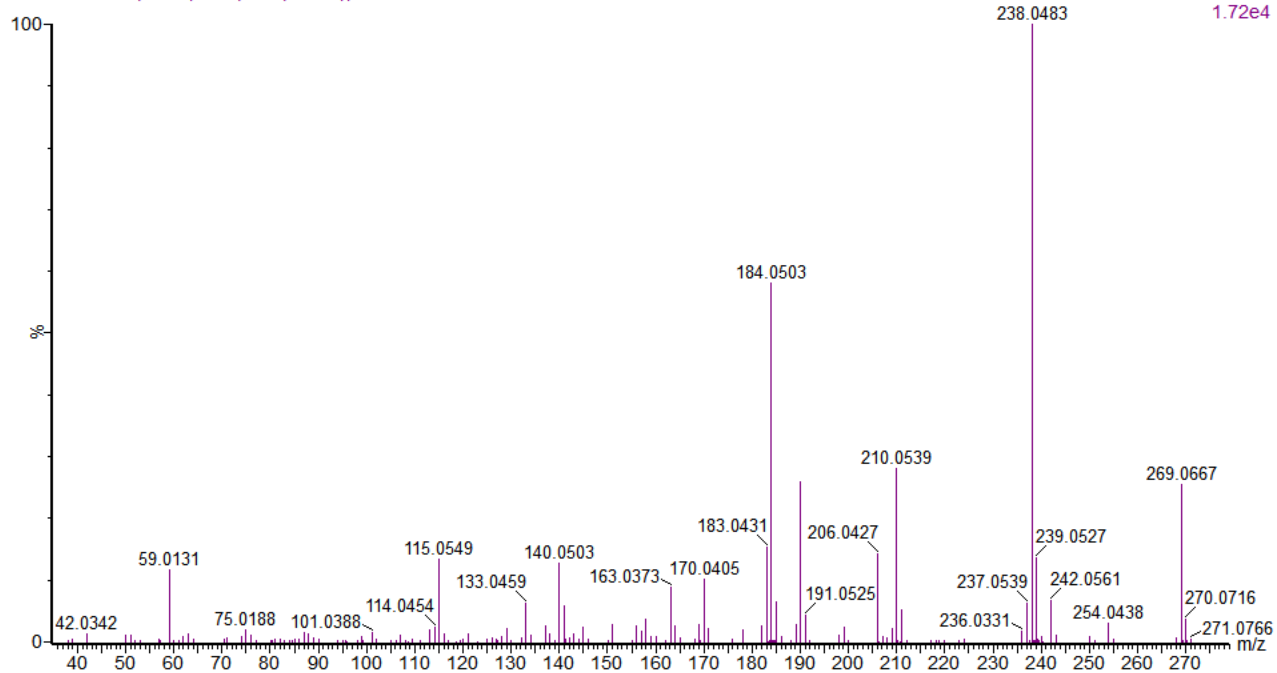

<sup>1</sup>H NMR spectrum of *cis-3ga*

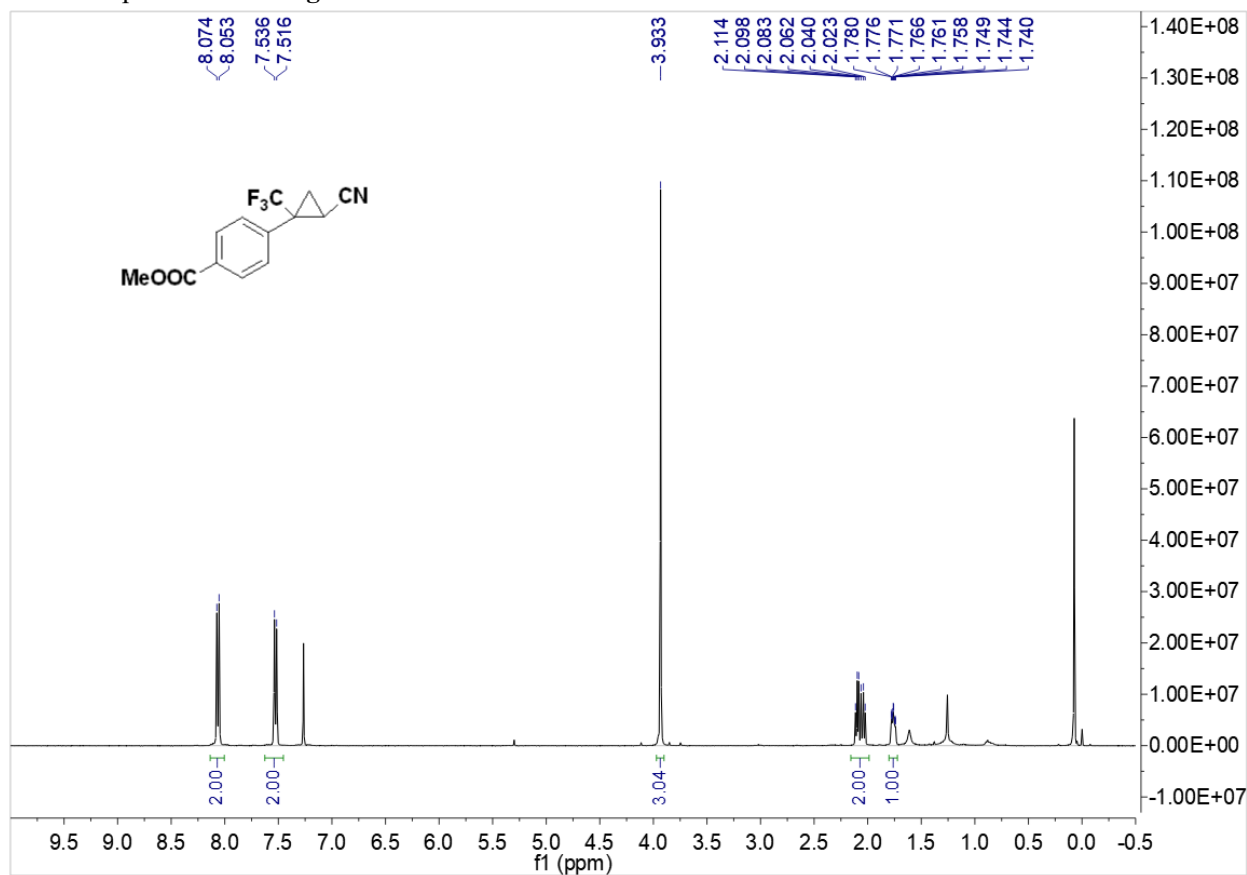

<sup>13</sup>C NMR spectrum of *cis-3ga*

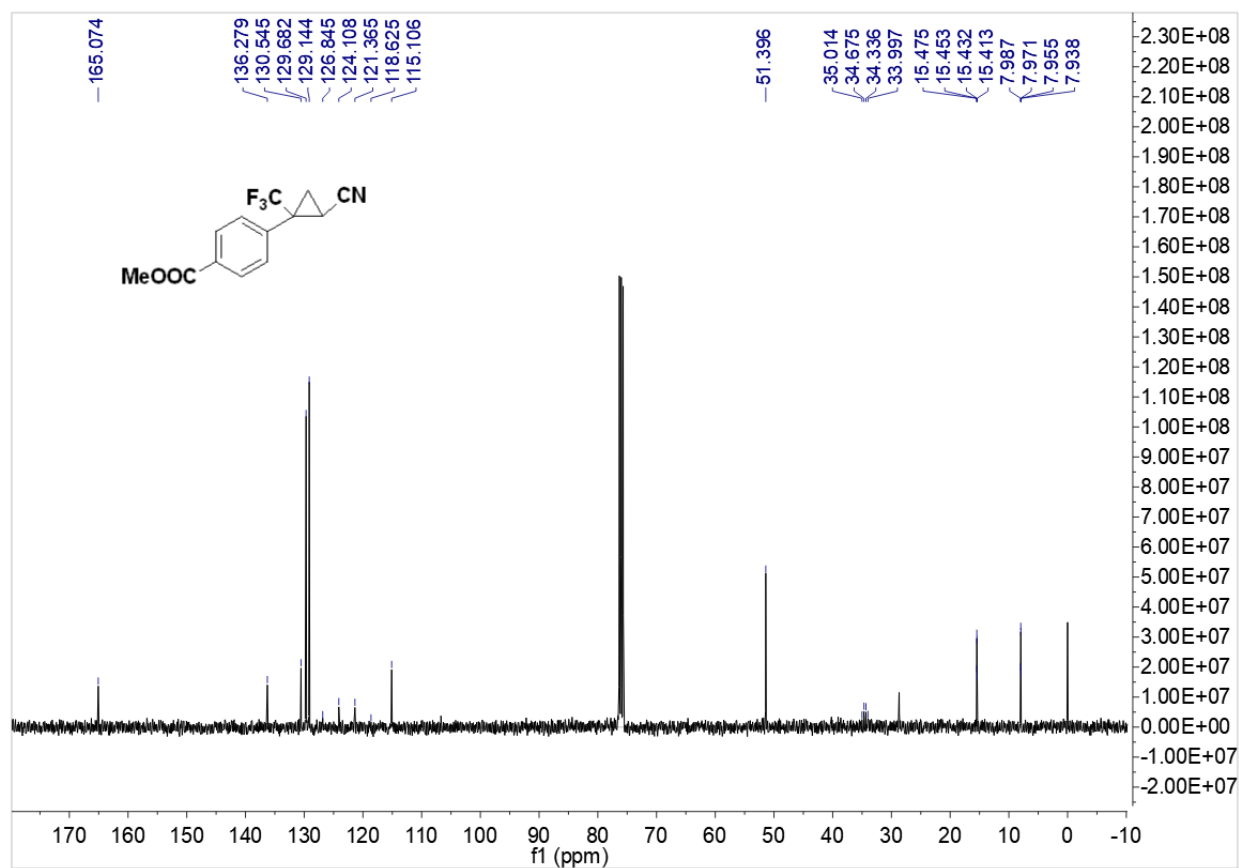

$^{19}\text{F}$  NMR spectrum of *cis*-3ga

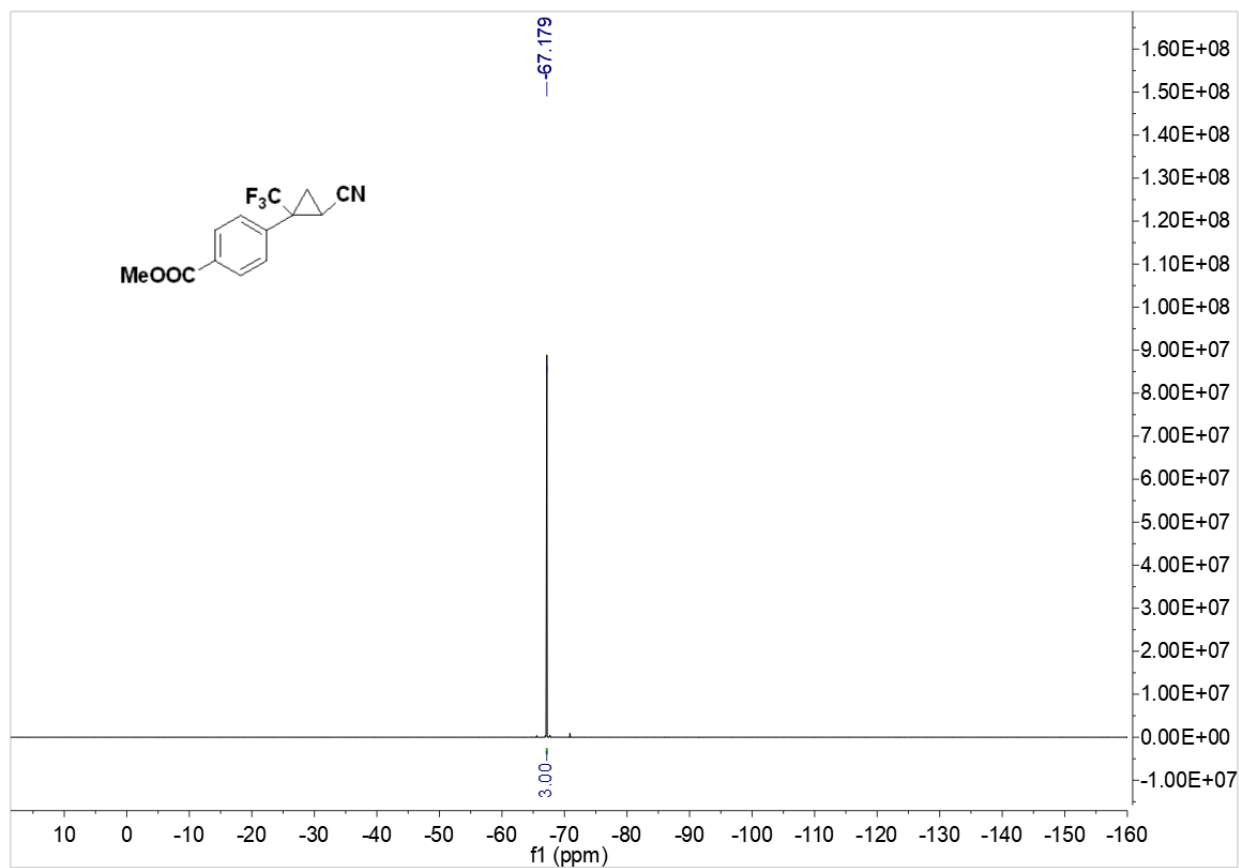

$^1\text{H}$  NMR spectrum of *trans*-3ha

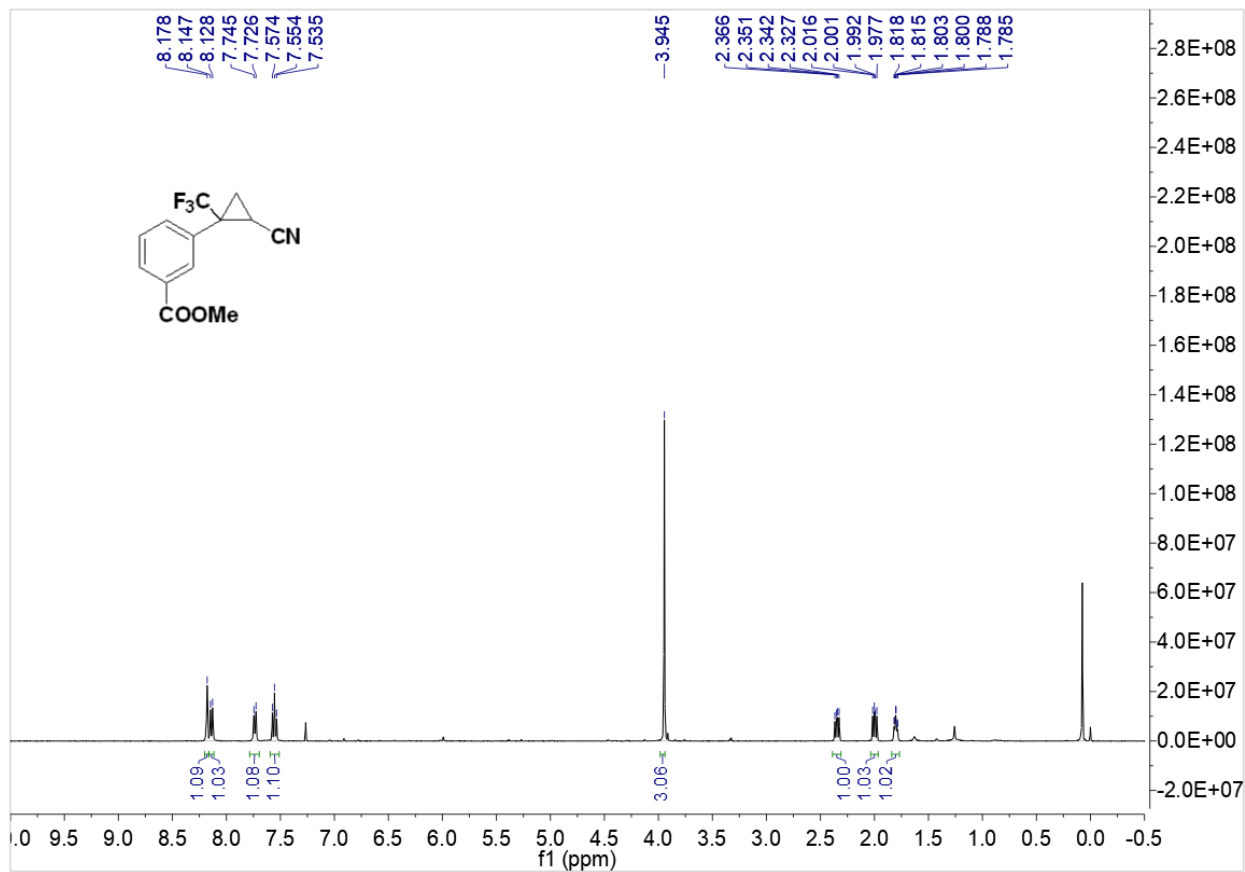

$^{13}\text{C}$  NMR spectrum of *trans*-3ha

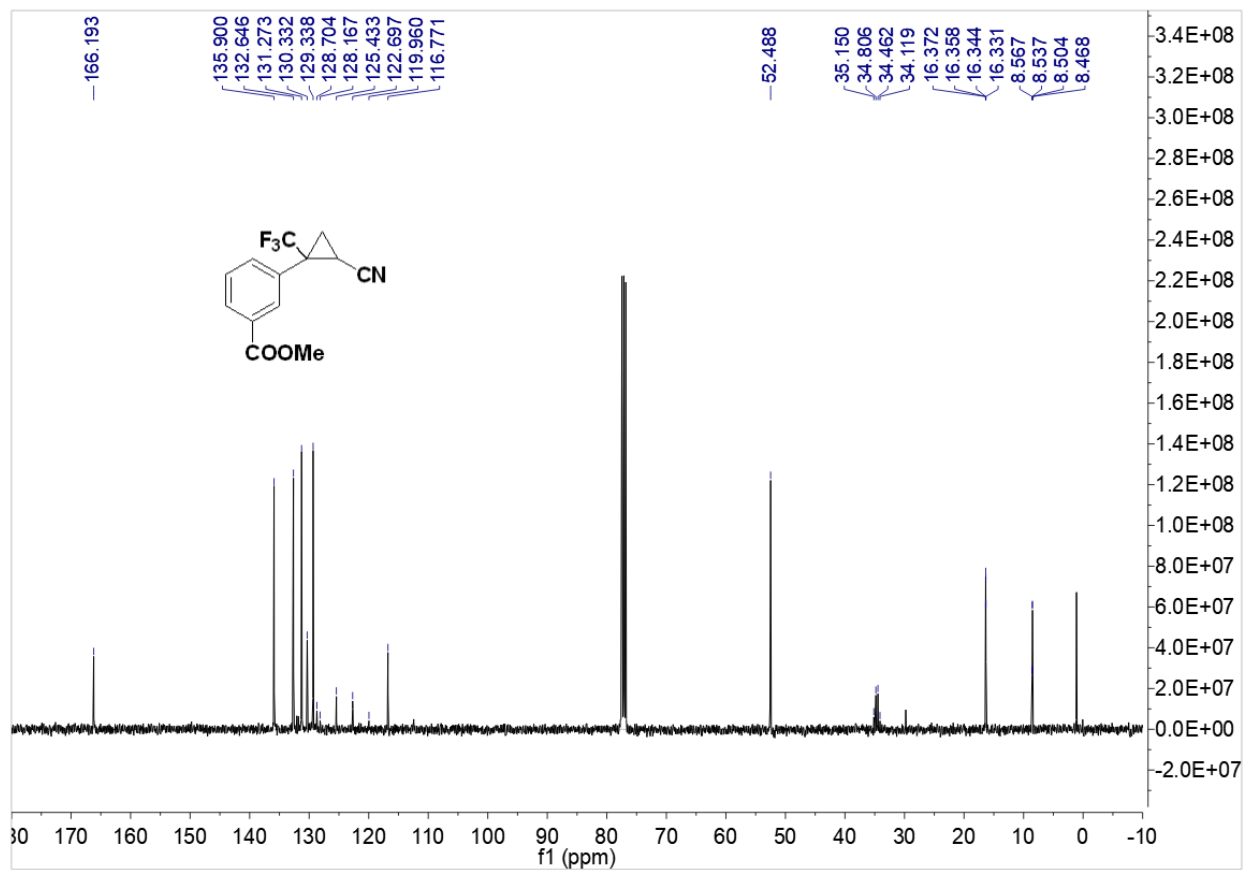

$^{19}\text{F}$  NMR spectrum of *trans*-3ha

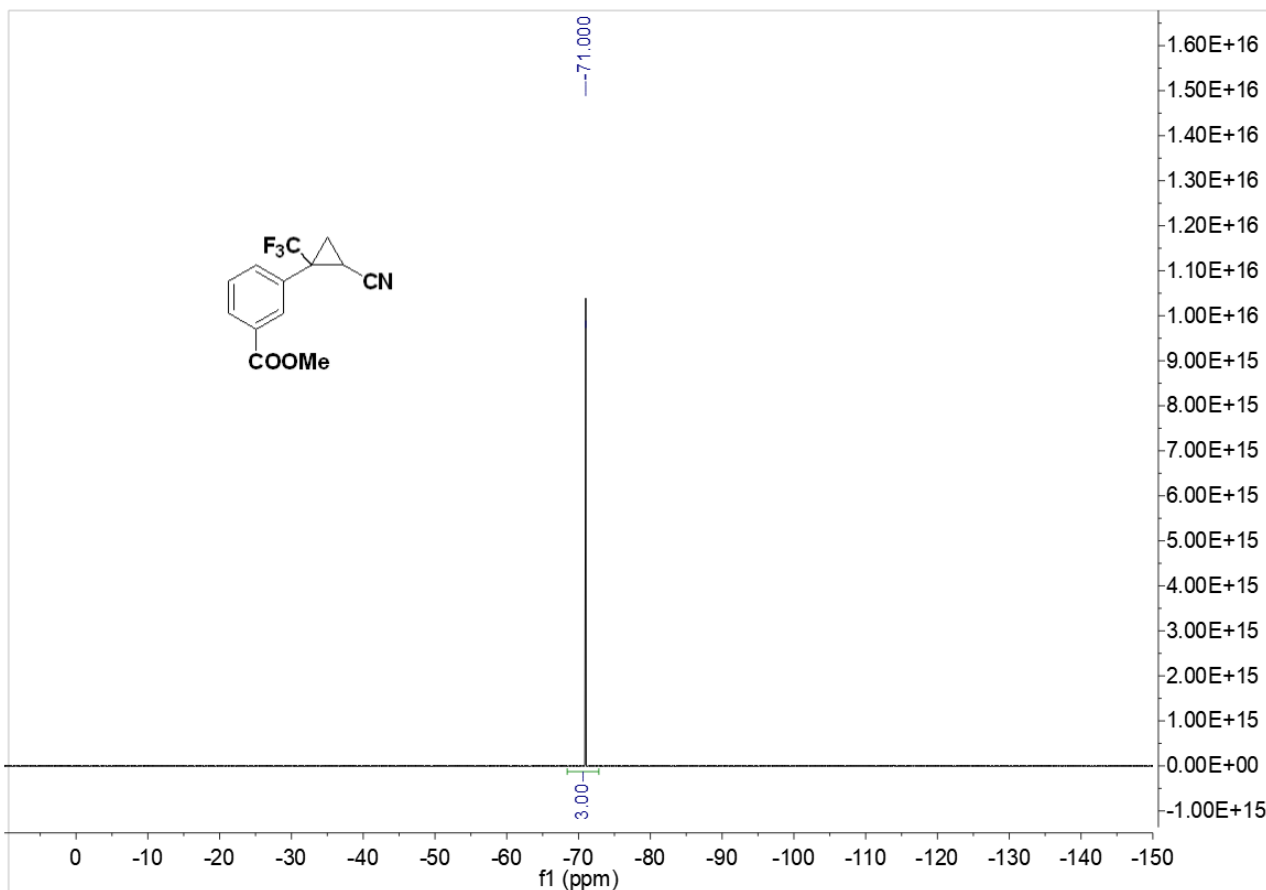

Elemental Composition Report

Single Mass Analysis

Tolerance = 20.0 PPM / DBE: min = -1.5, max = 50.0

Element prediction: Off

Number of isotope peaks used for i-FIT = 3

Monoisotopic Mass, Even Electron Ions

385 formula(e) evaluated with 1 results within limits (up to 50 closest results for each mass)

Elements Used:

C: 13-13 H: 10-10 N: 0-20 O: 0-20 F: 3-3 Na: 0-3

6

230410-1-18 5 (0.076)

1: TOF MS ES+  
1.04e+007

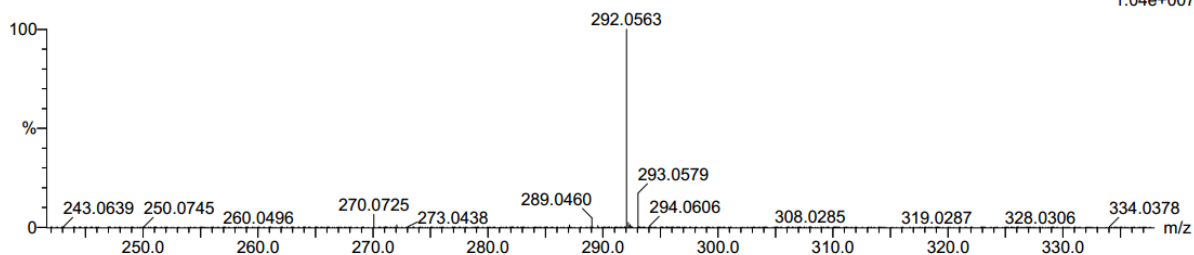

Minimum: -1.5  
Maximum: 5.0 20.0 50.0

| Mass     | Calc. Mass | mDa | PPM | DBE | i-FIT | Norm | Conf (%) | Formula            |
|----------|------------|-----|-----|-----|-------|------|----------|--------------------|
| 292.0563 | 292.0561   | 0.2 | 0.7 | 7.5 | 421.9 | n/a  | n/a      | C13 H10 N O2 F3 Na |

<sup>1</sup>H NMR spectrum of *trans-3ia*

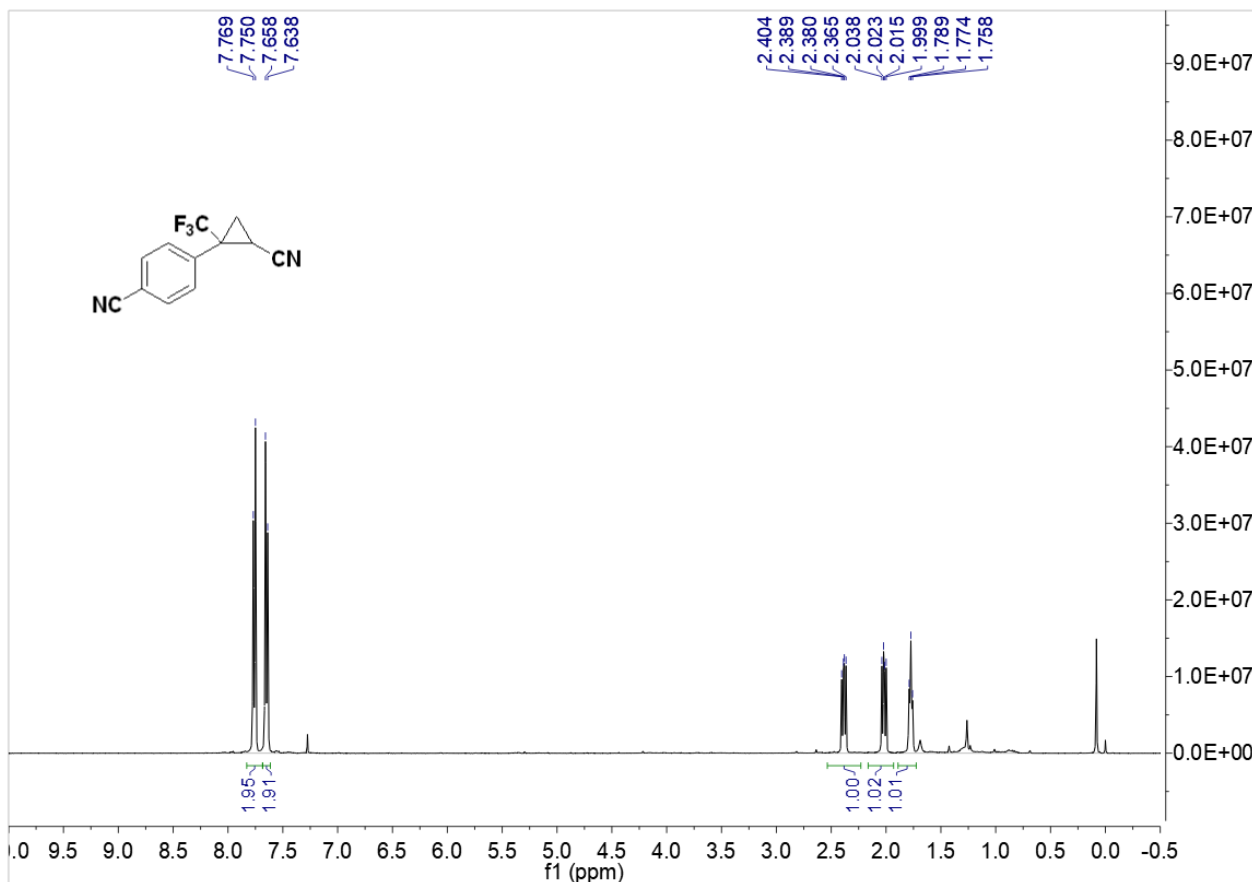

$^{13}\text{C}$  NMR spectrum of *trans*-3ia

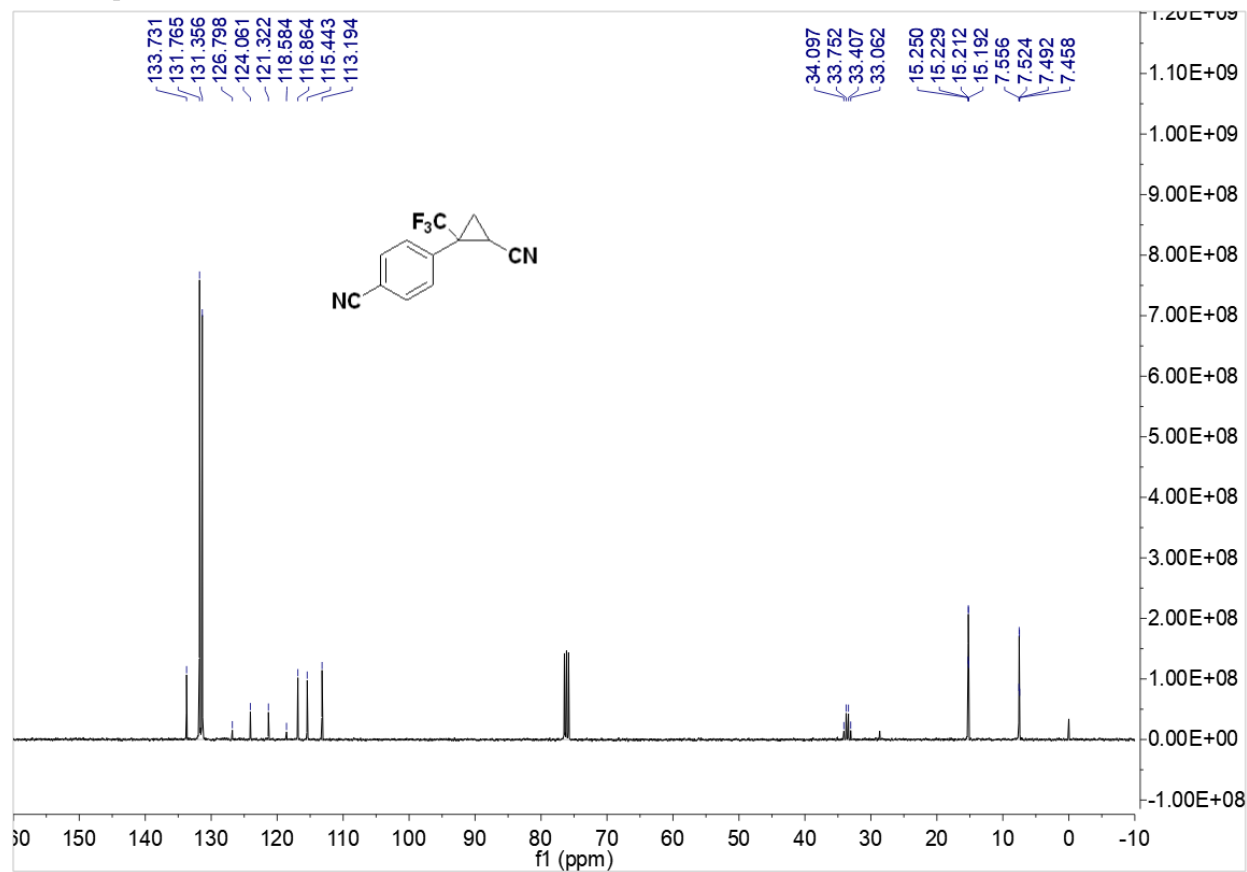

$^{19}\text{F}$  NMR spectrum of *trans*-3ia

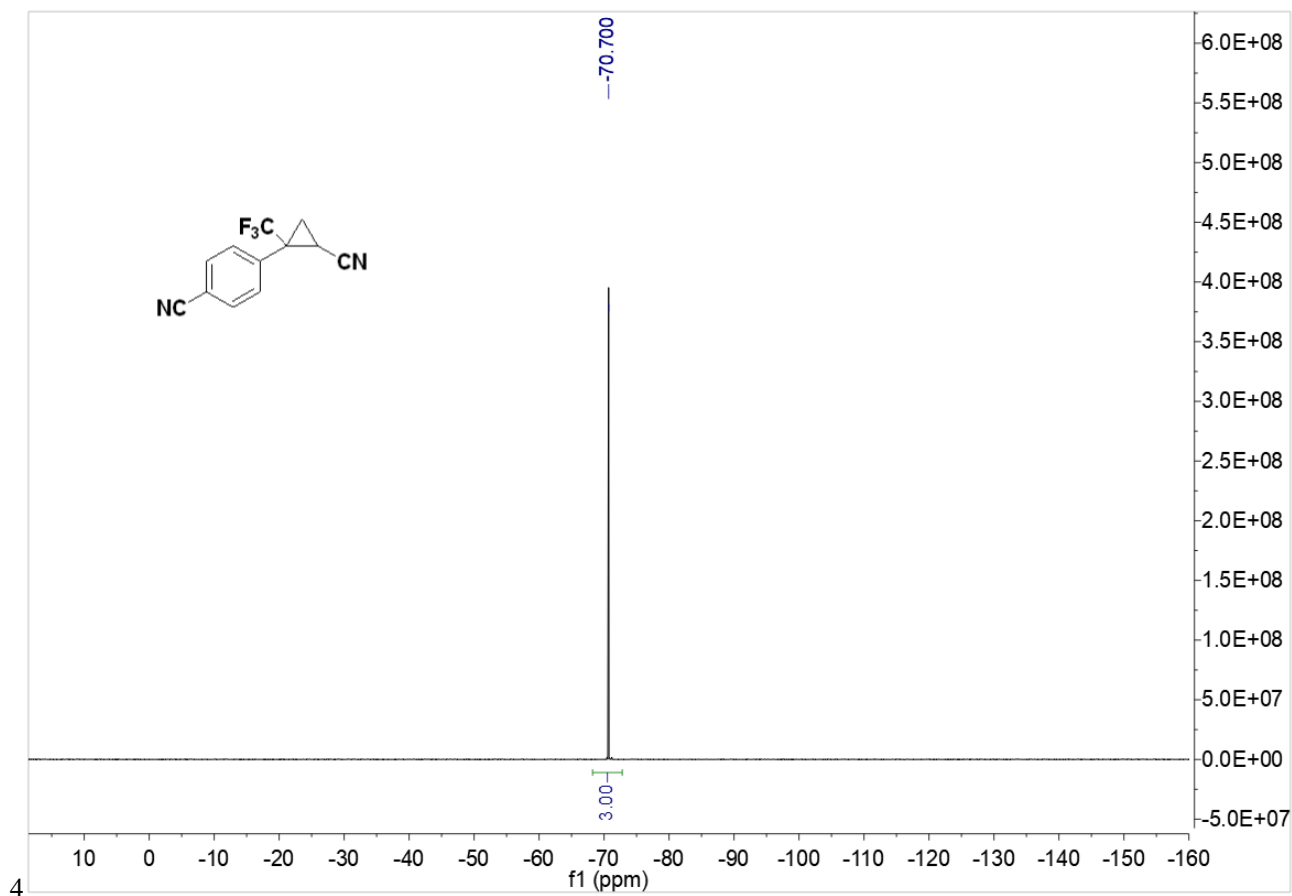

HRMS (EI) spectrum of *trans*-3ja

CS-DYP-4236

20222051 522 (8.700) Cm (522-(26+34))

Waters GCT Premier

TOF MS EI+  
1.49e4

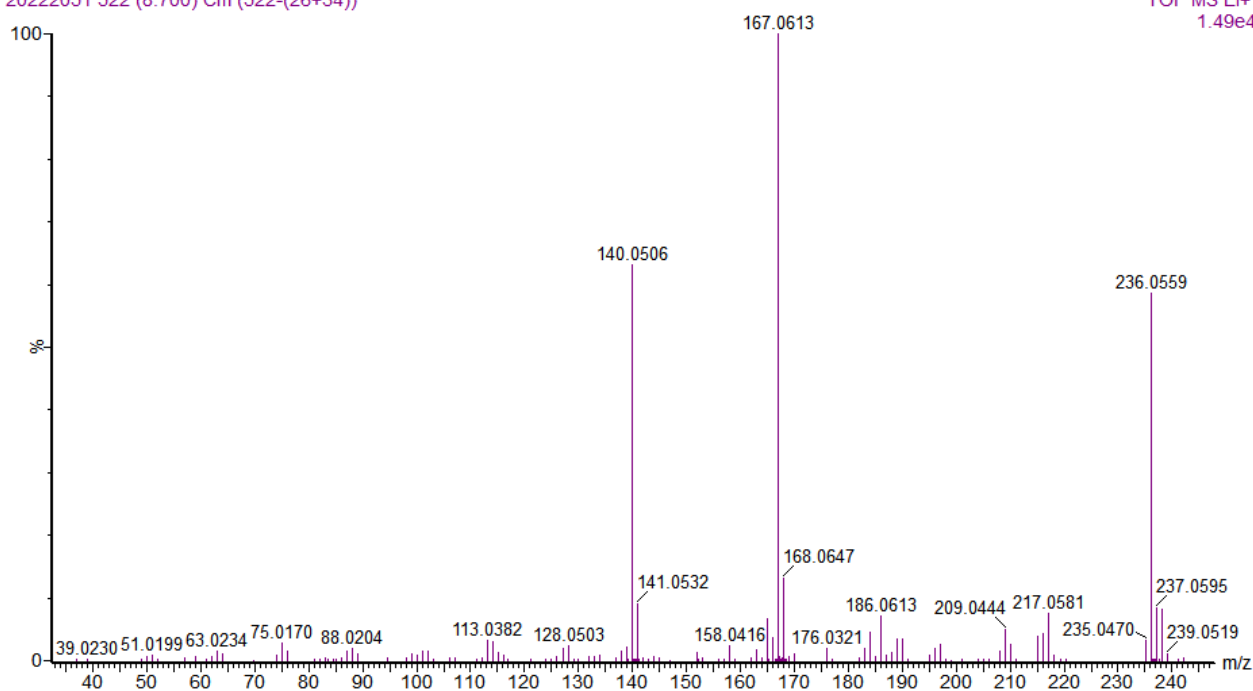

<sup>1</sup>H NMR spectrum of *trans*-3ja

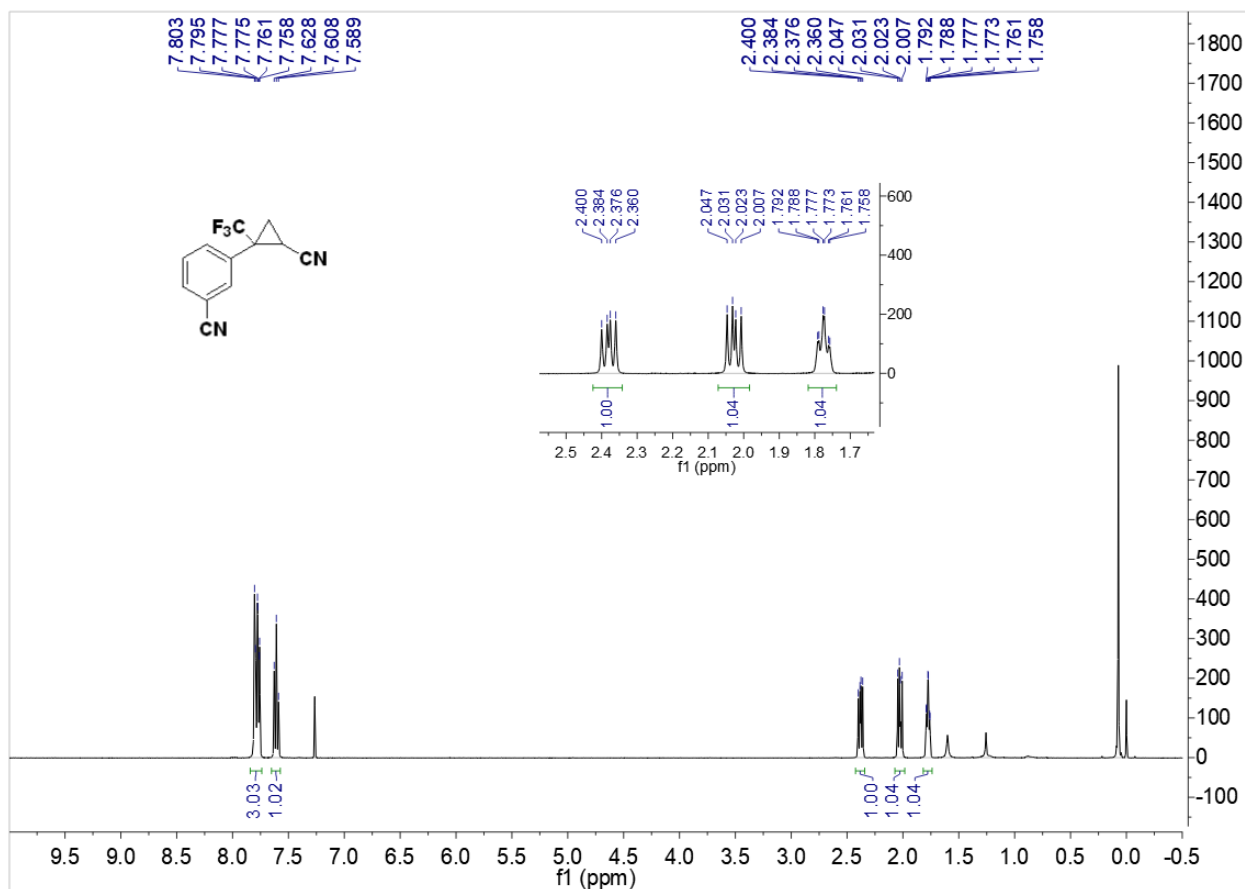

<sup>13</sup>C NMR spectrum of *trans*-3ja

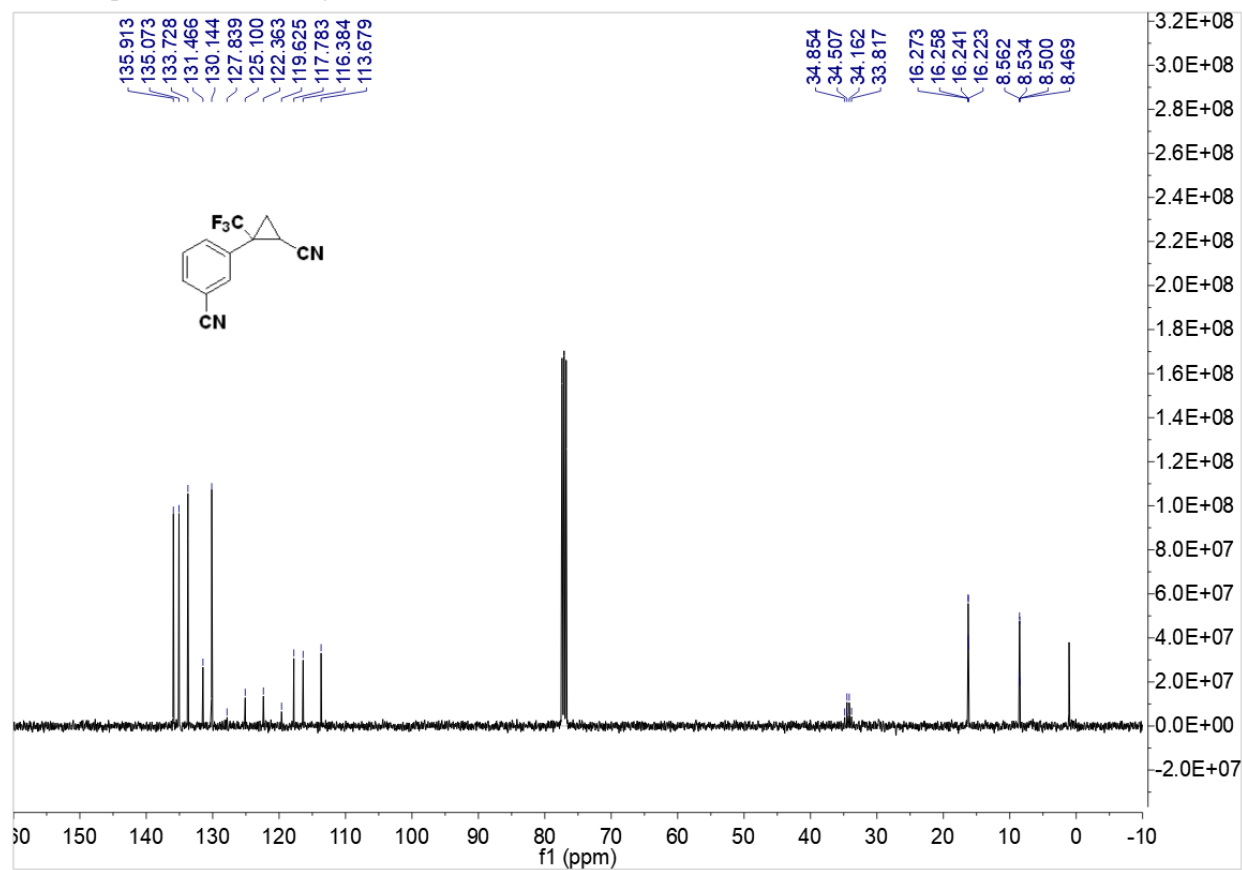

<sup>19</sup>F NMR spectrum of *trans*-3ja

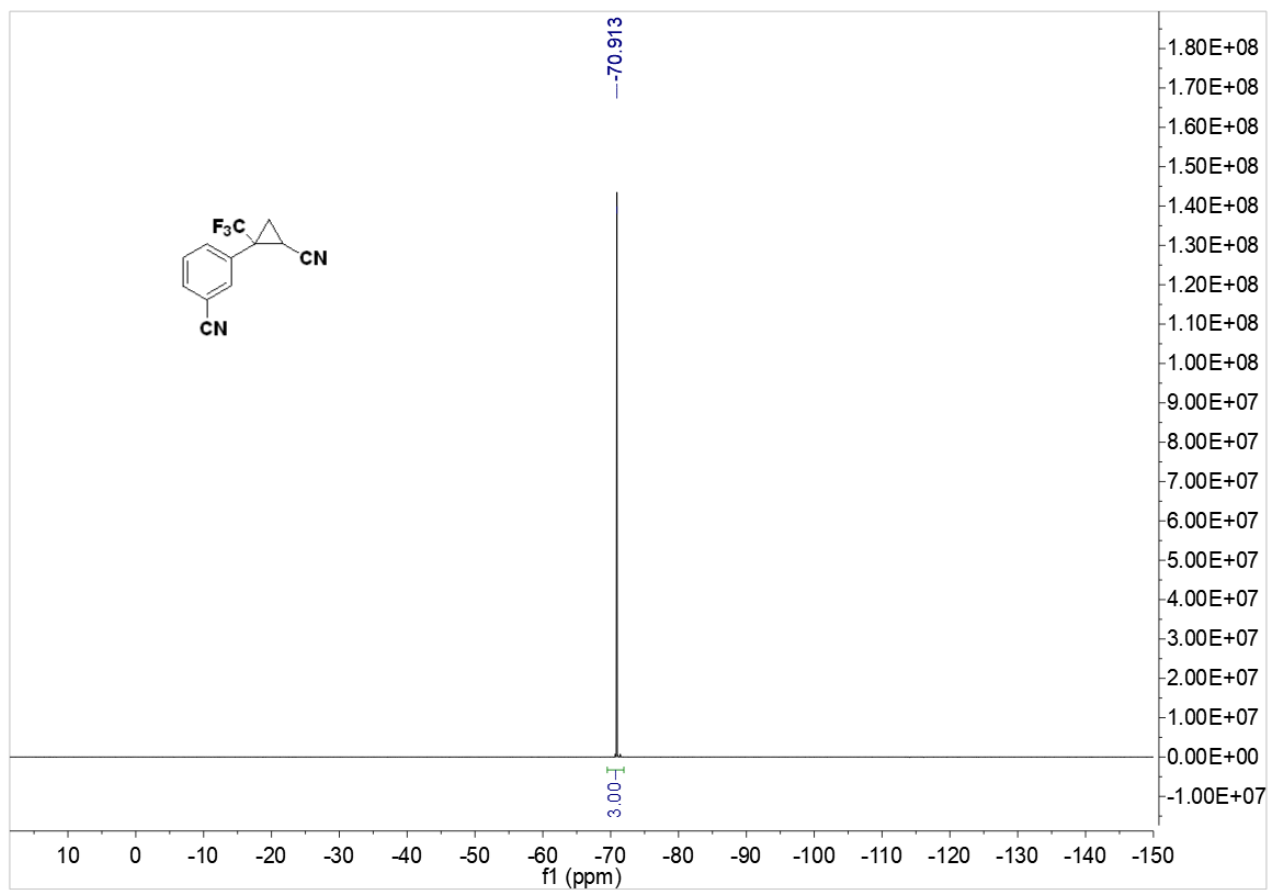



HRMS (EI) spectrum of *trans*-3ja

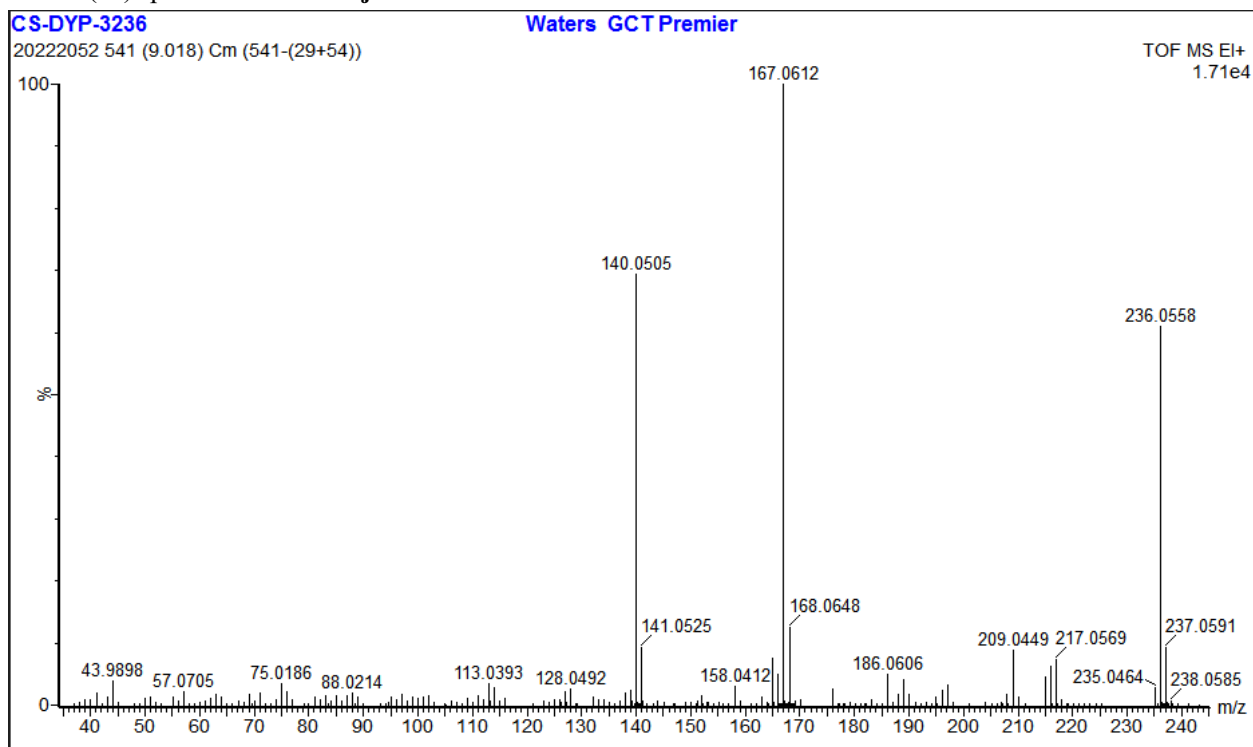

<sup>1</sup>H NMR spectrum of *trans*-3ka

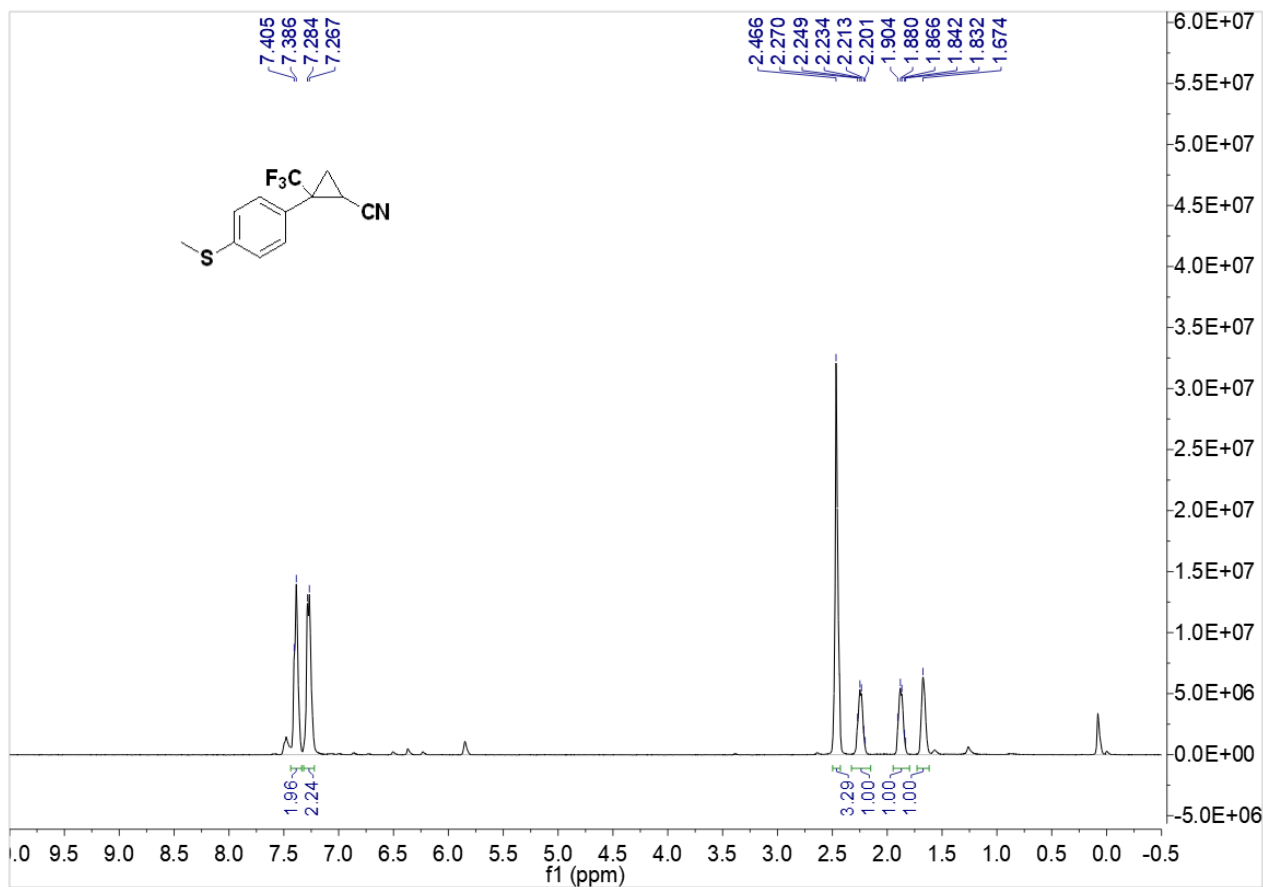

<sup>13</sup>C NMR spectrum of *trans*-3ka

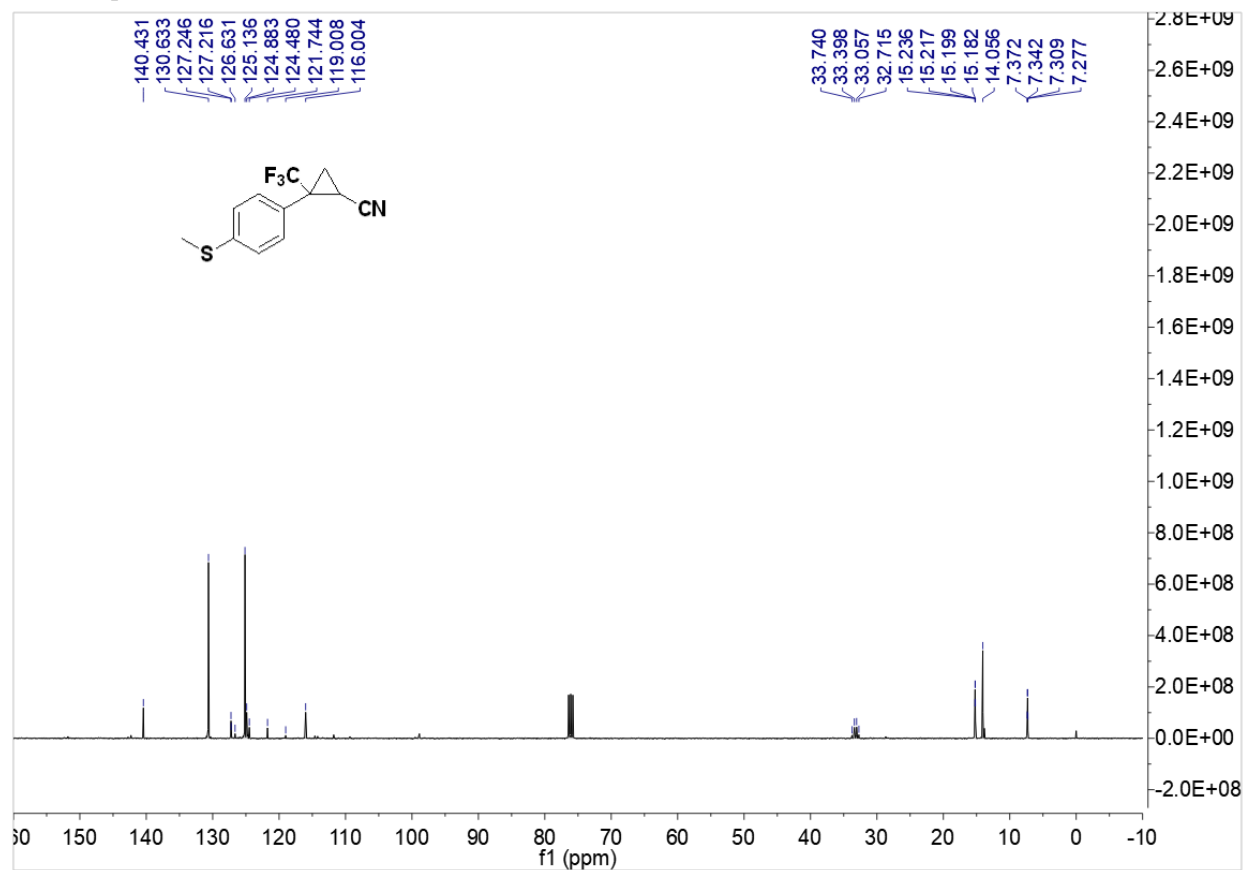

<sup>19</sup>F NMR spectrum of *trans*-3ka

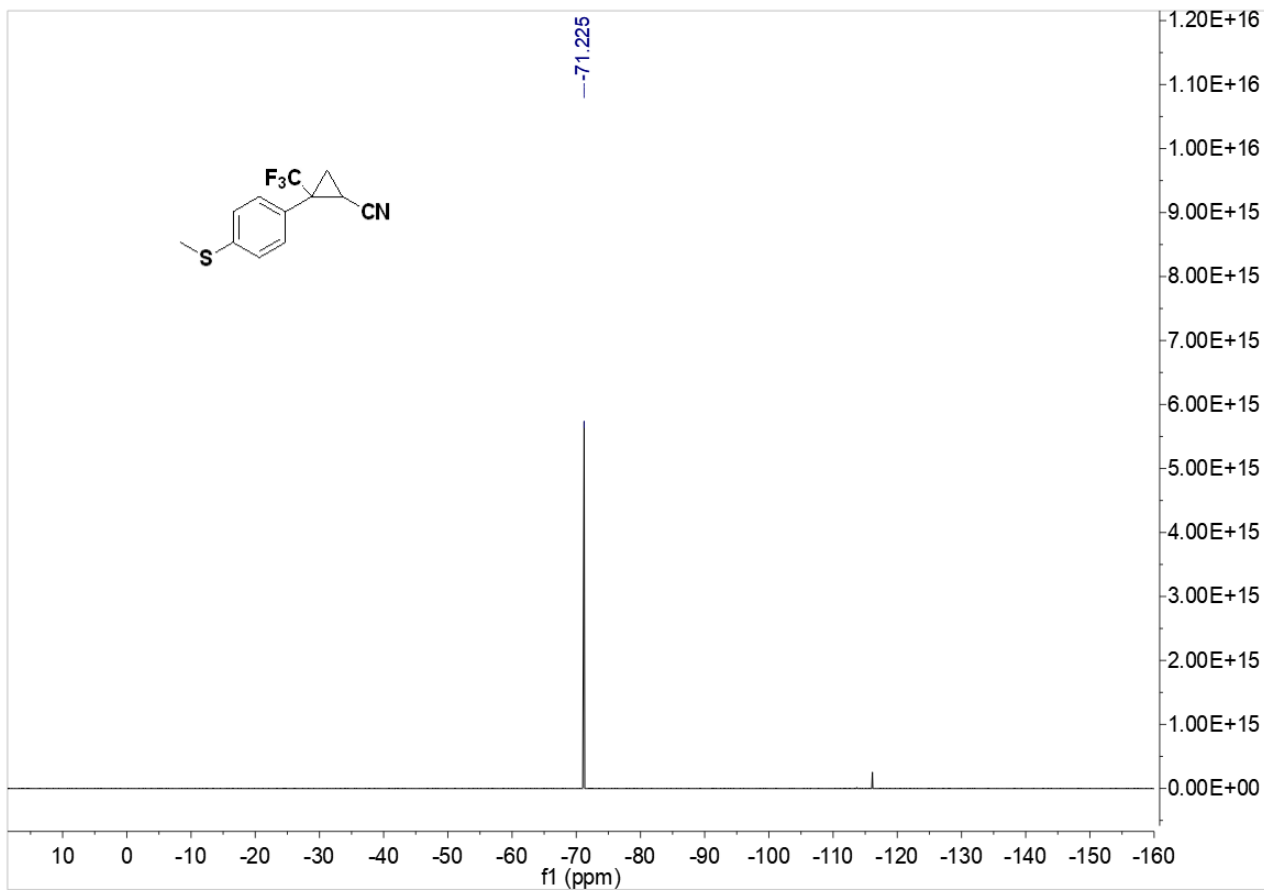

HRMS (EI) spectrum of *trans*-3ka

CS-DYP-257

20222060 393 (6.550) Cm (393-(26+56))

Waters GCT Premier

TOF MS EI+  
1.86e4

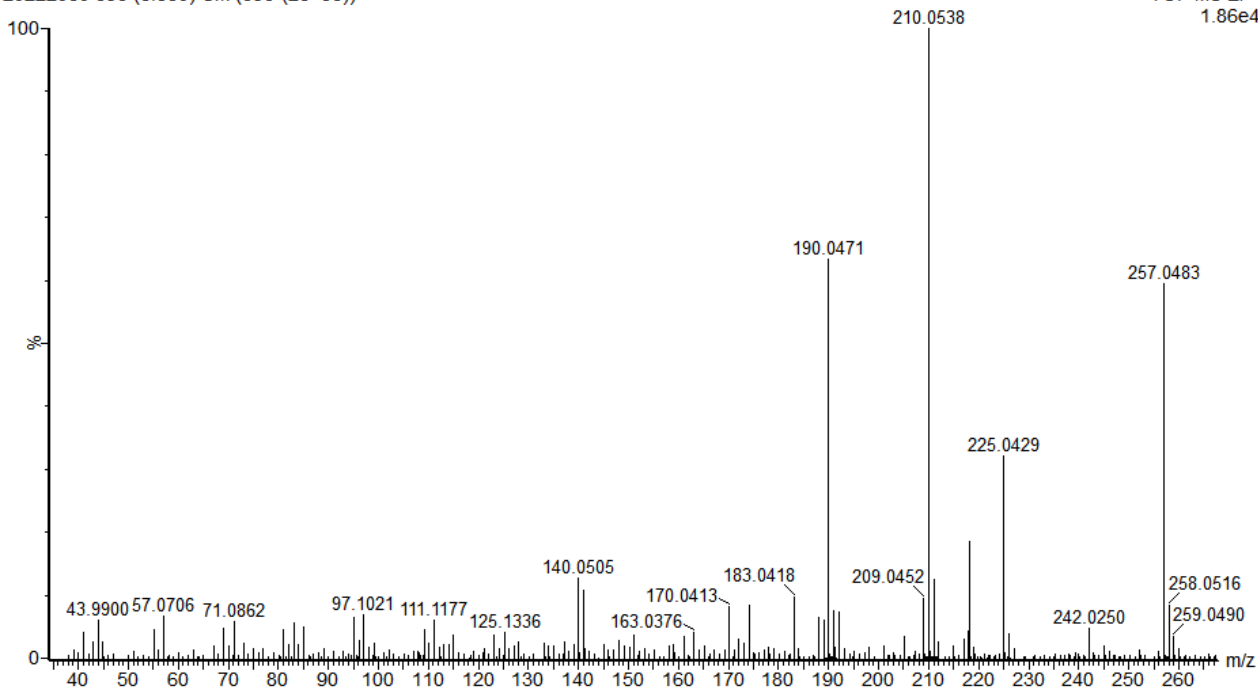

<sup>1</sup>H NMR spectrum of *trans*-3la

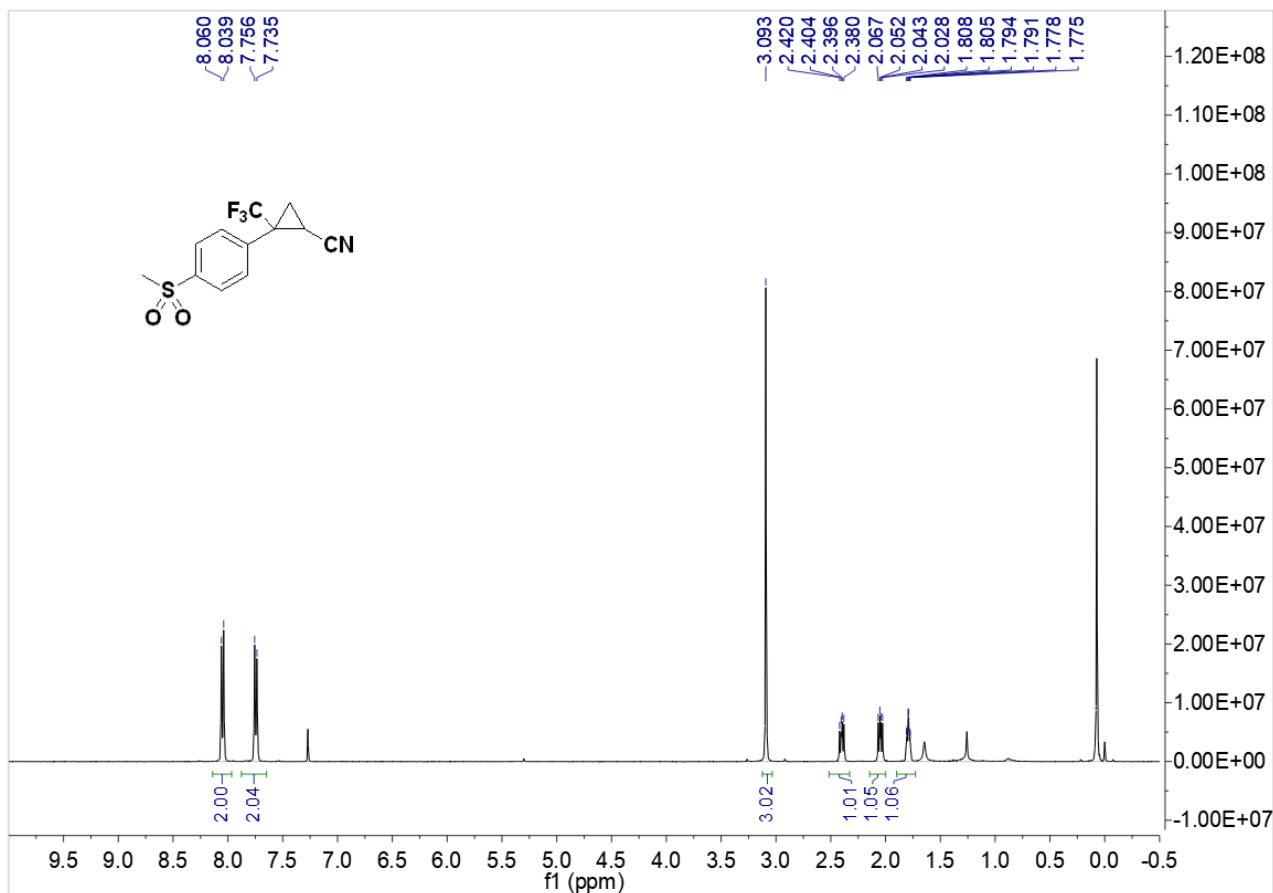

<sup>13</sup>C NMR spectrum of *trans*-3la

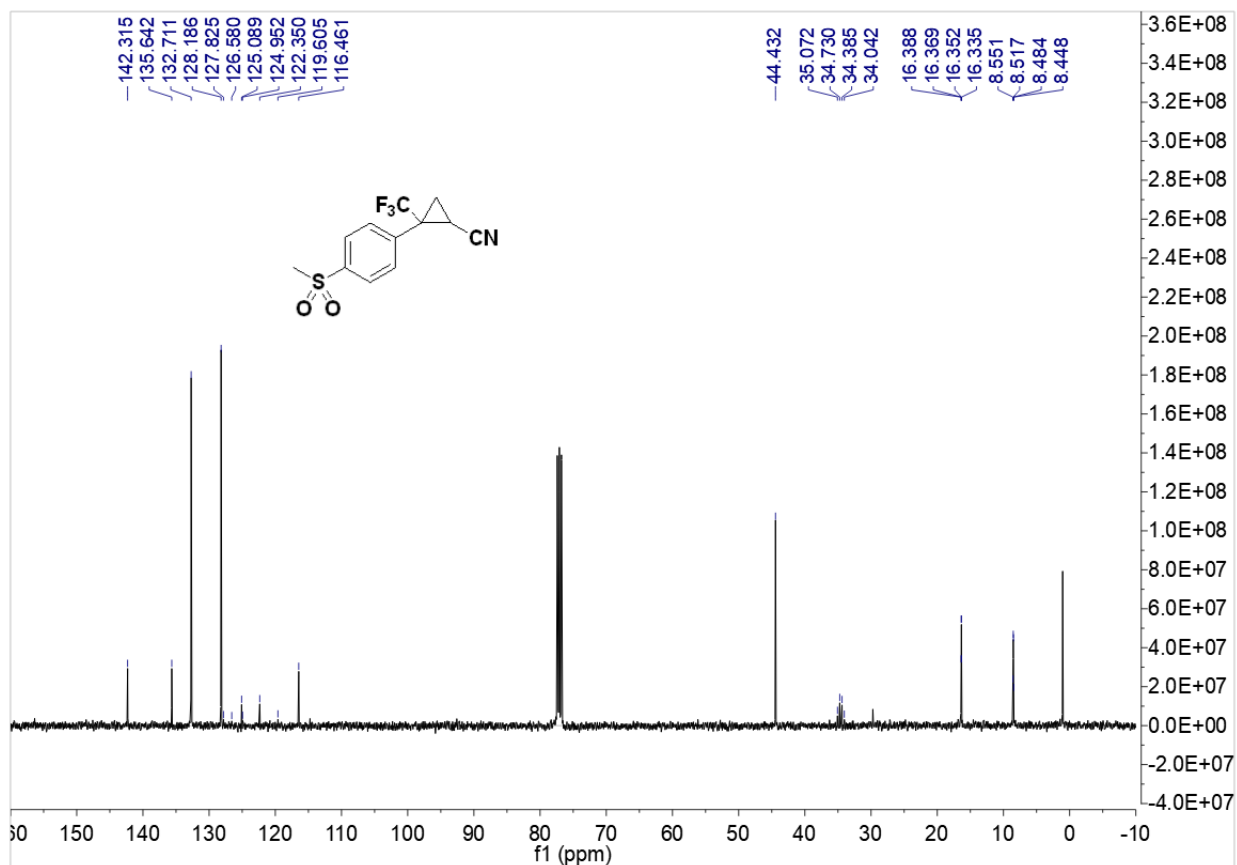

<sup>19</sup>F NMR spectrum of *trans*-3la

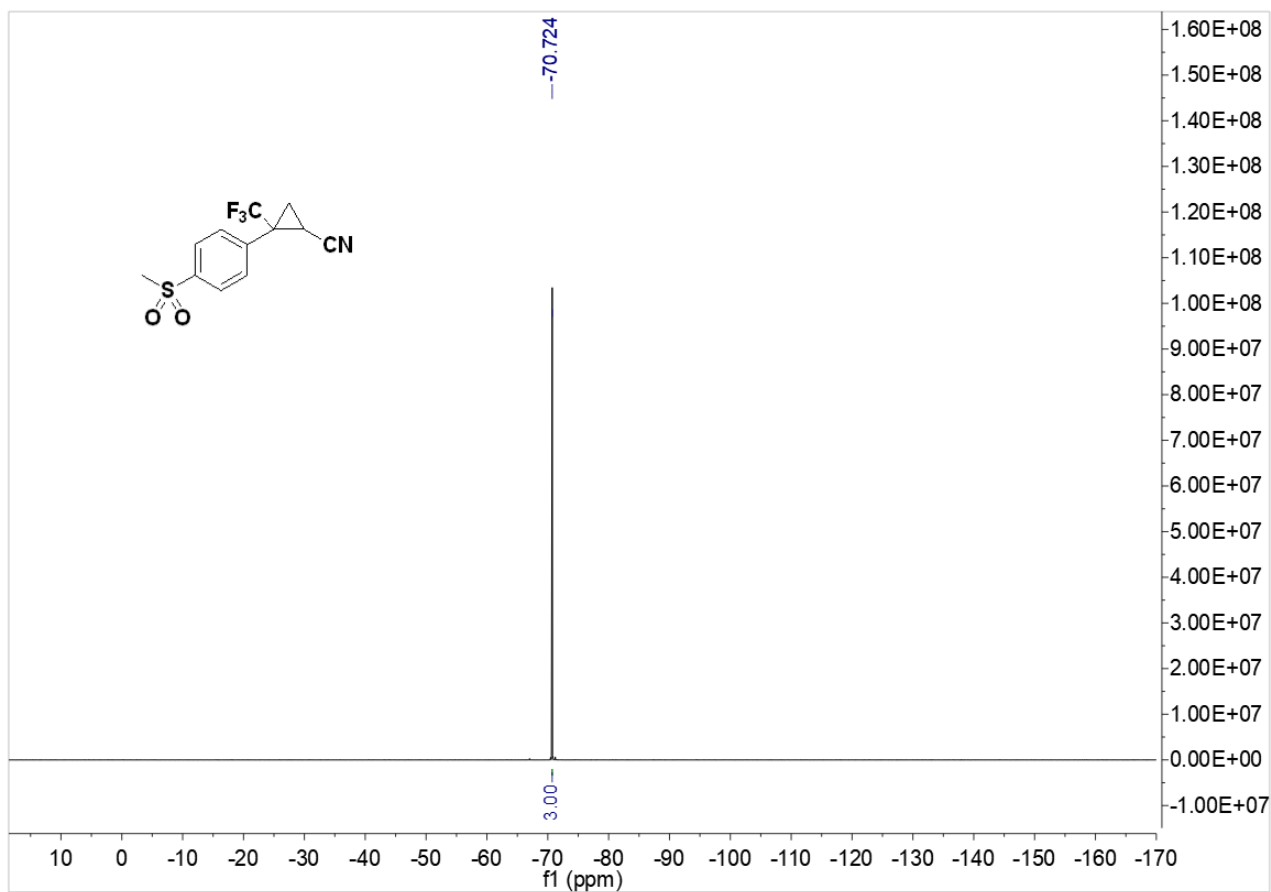

HRMS (EI) spectrum of *trans*-3la

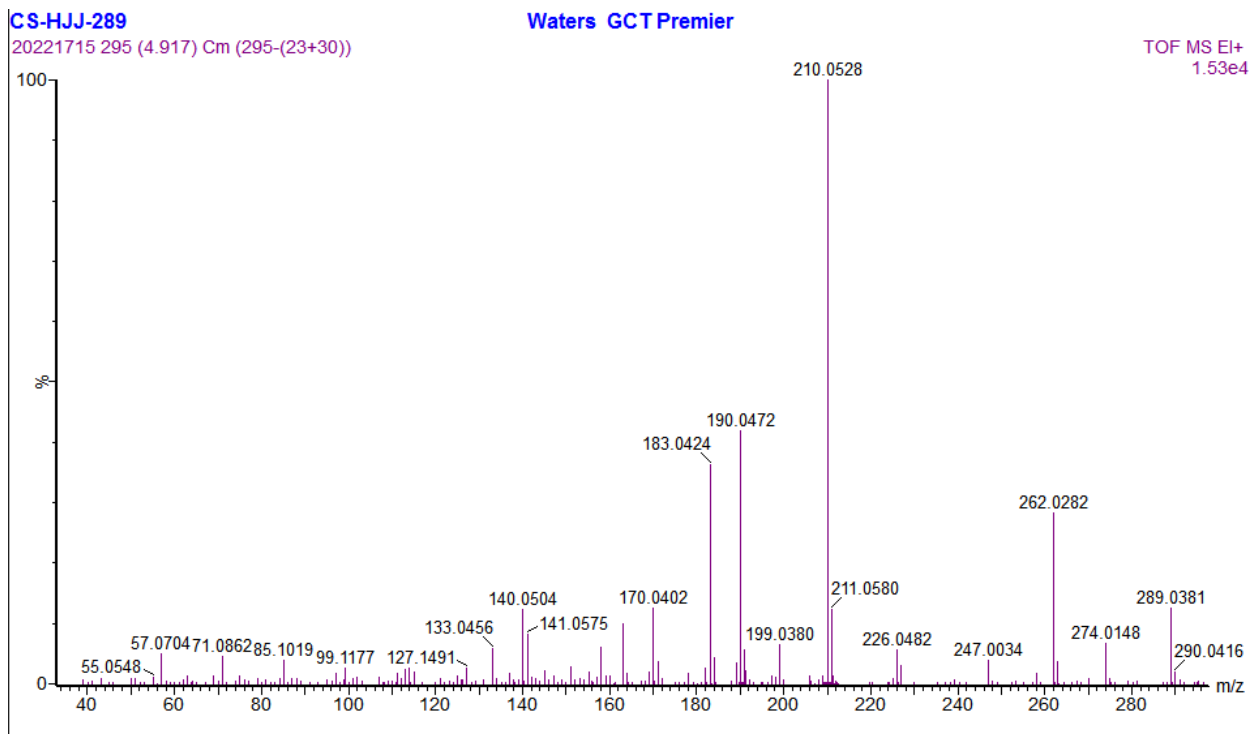

<sup>1</sup>H NMR spectrum of *trans*-3ma

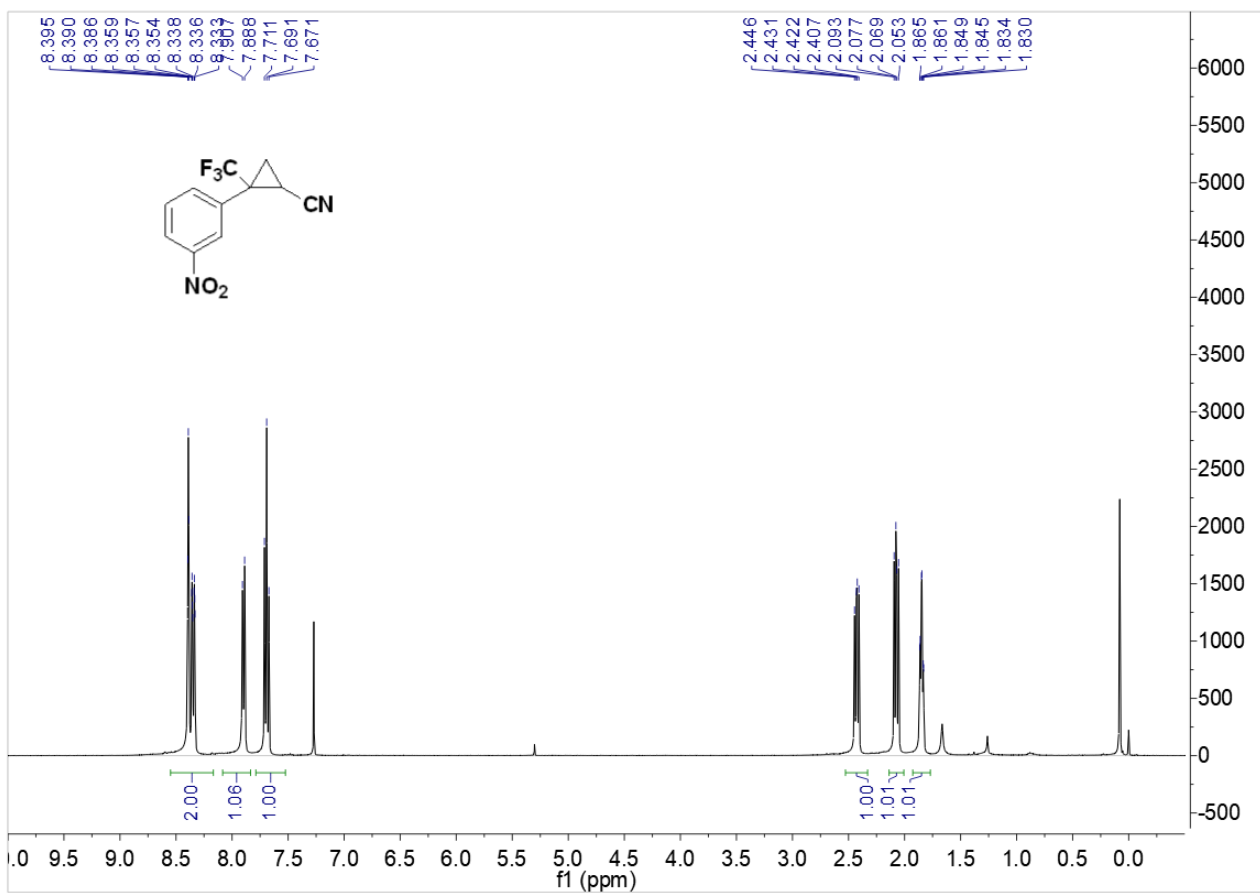

<sup>13</sup>C NMR spectrum of *trans*-3ma

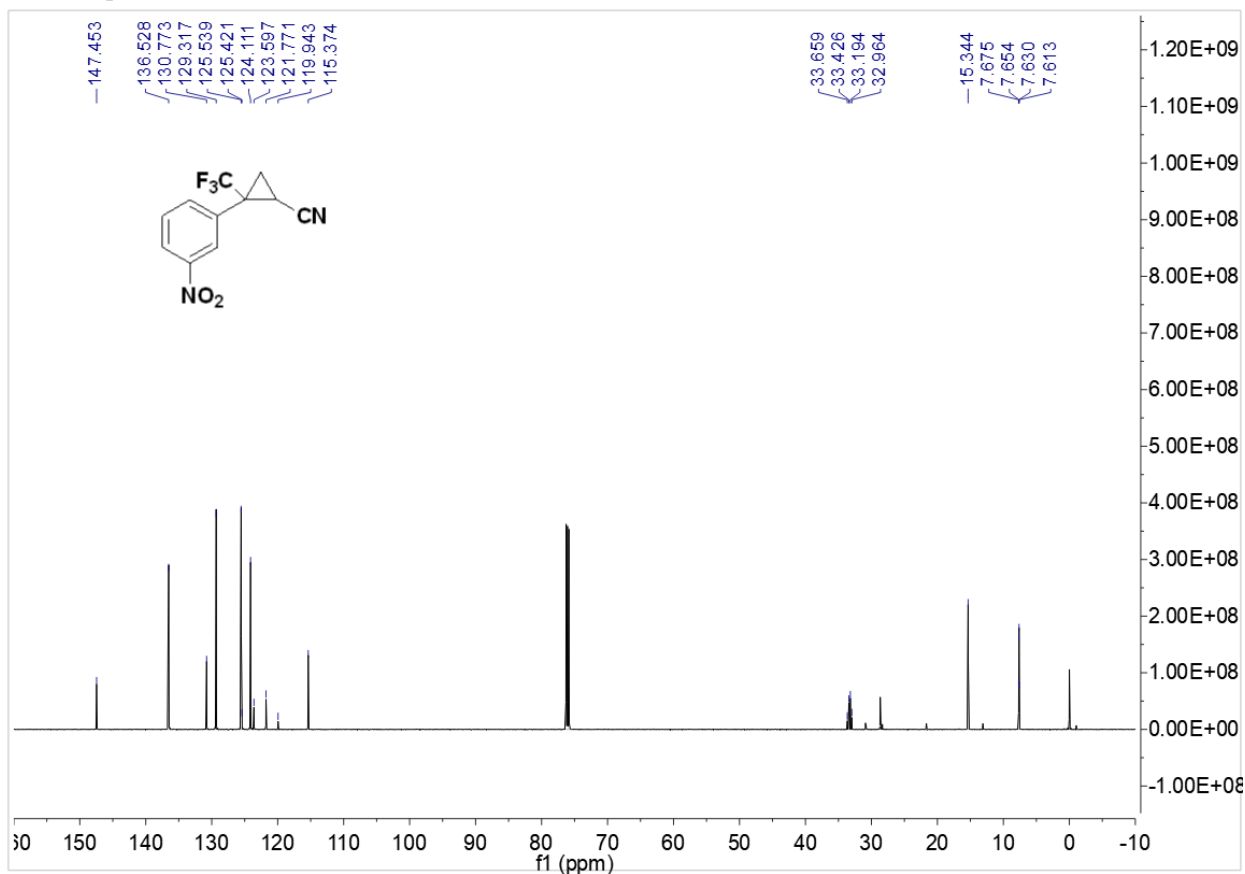

<sup>19</sup>F NMR spectrum of *trans*-3ma

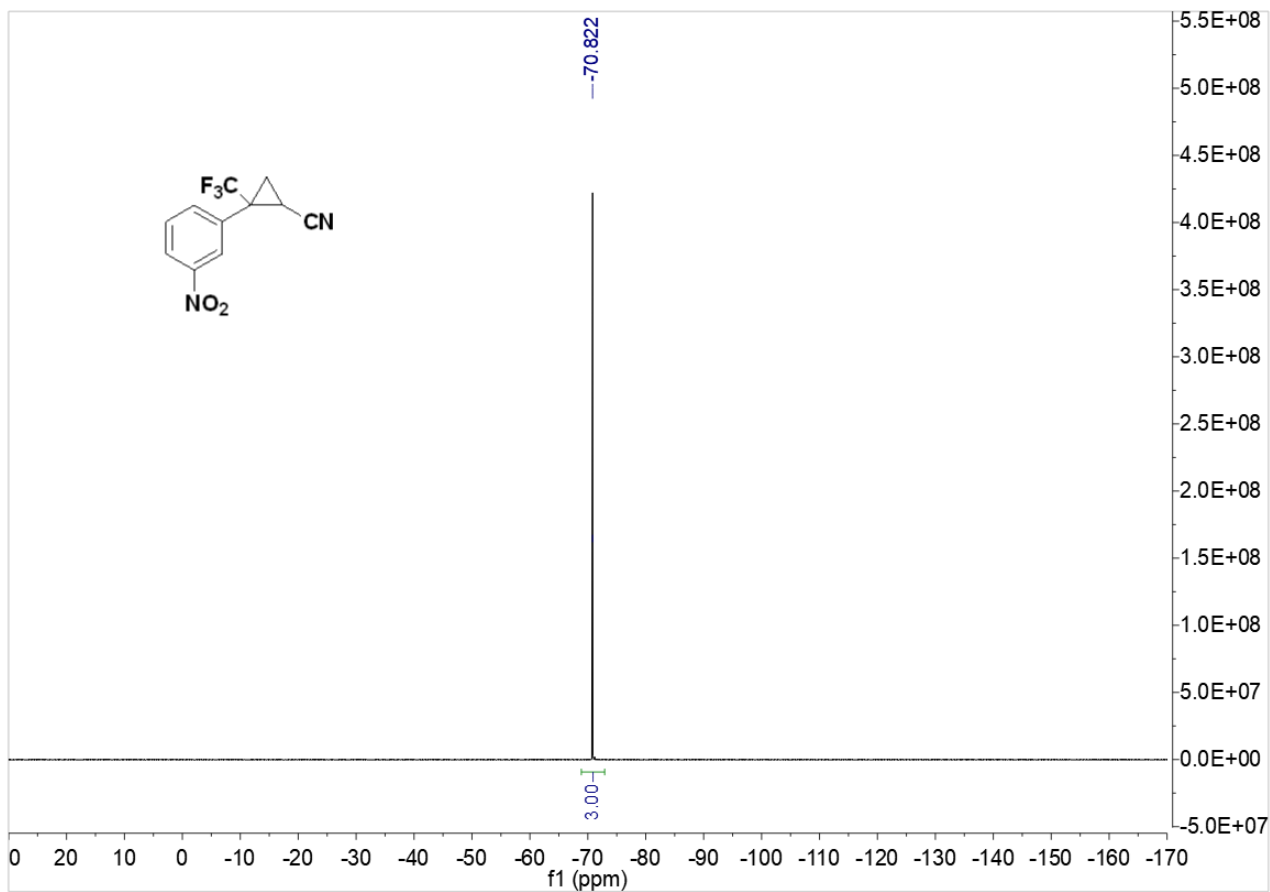

HRMS (EI) spectrum of *trans*-3ma

CS-DYP-256

20222034-1 70 (1.168) Cm (70-(24+49))

Waters GCT Premier

TOF MS EI+  
1.36e4

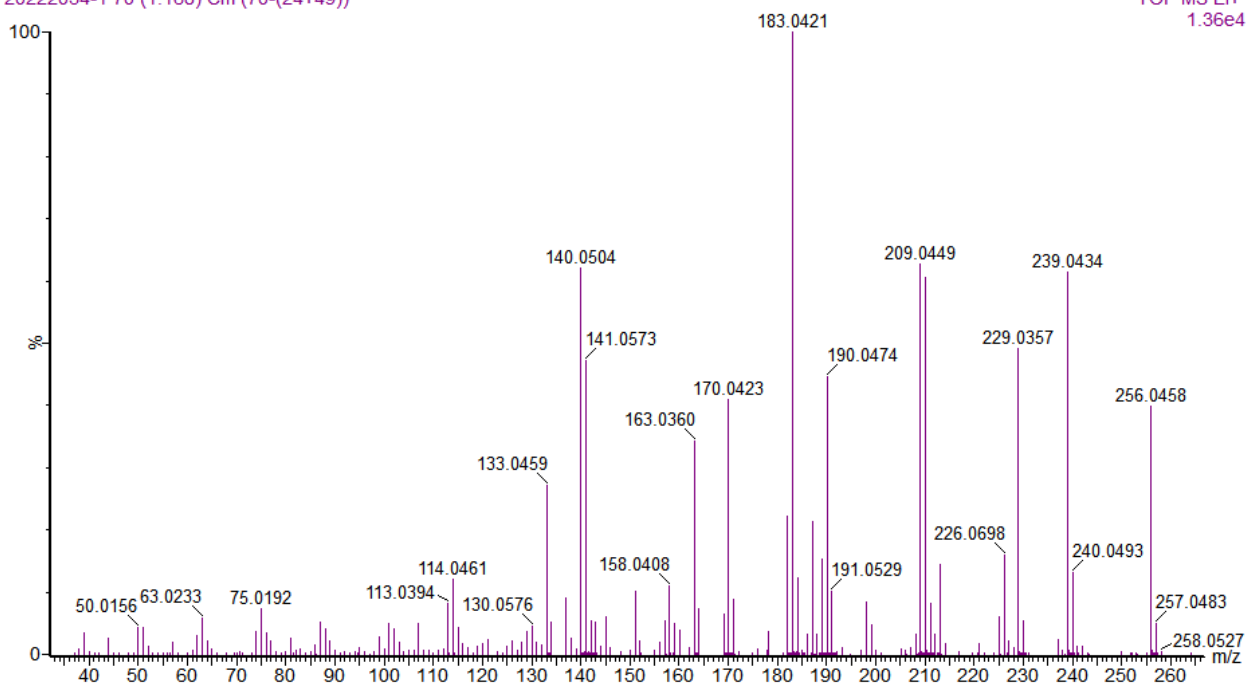

<sup>1</sup>H NMR spectrum of *cis*-3ma

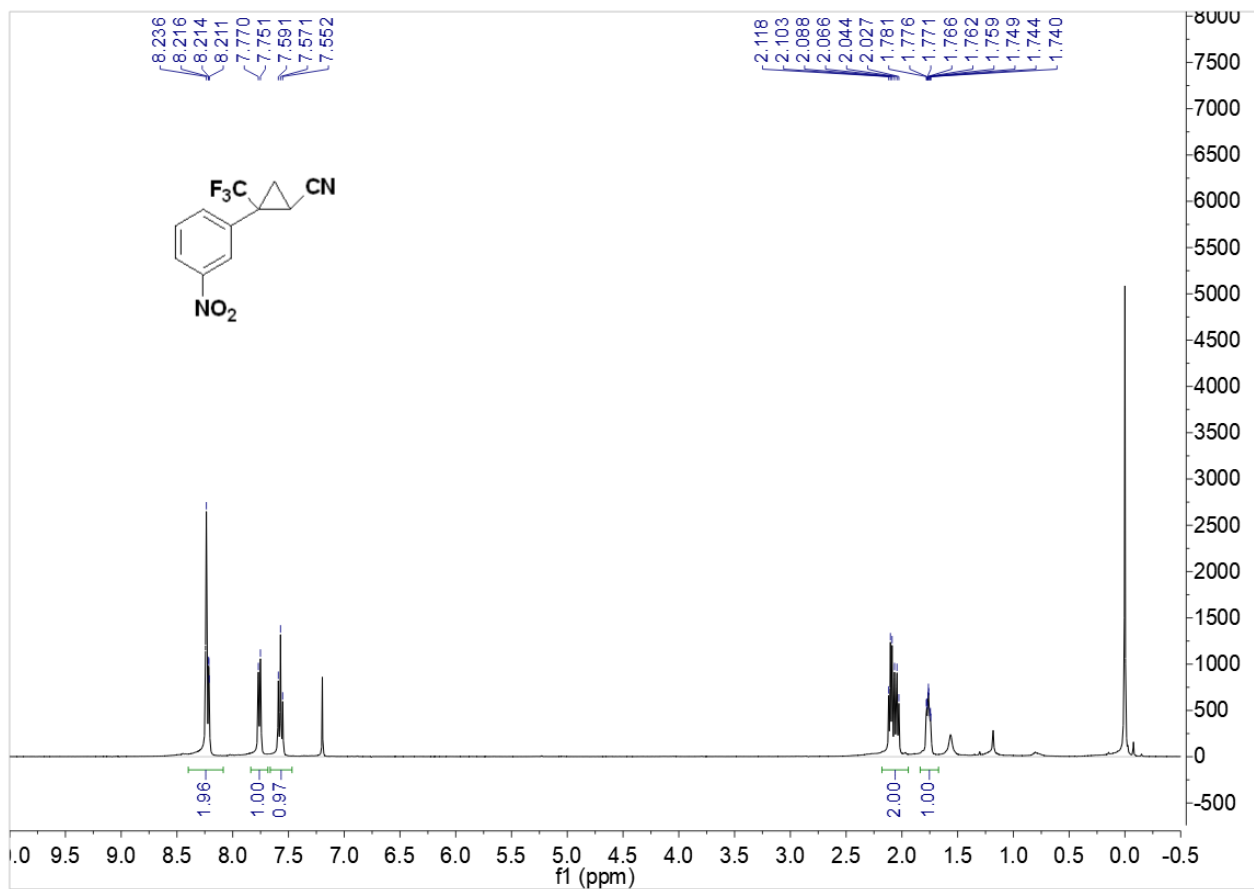

<sup>13</sup>C NMR spectrum of *cis-3ma*

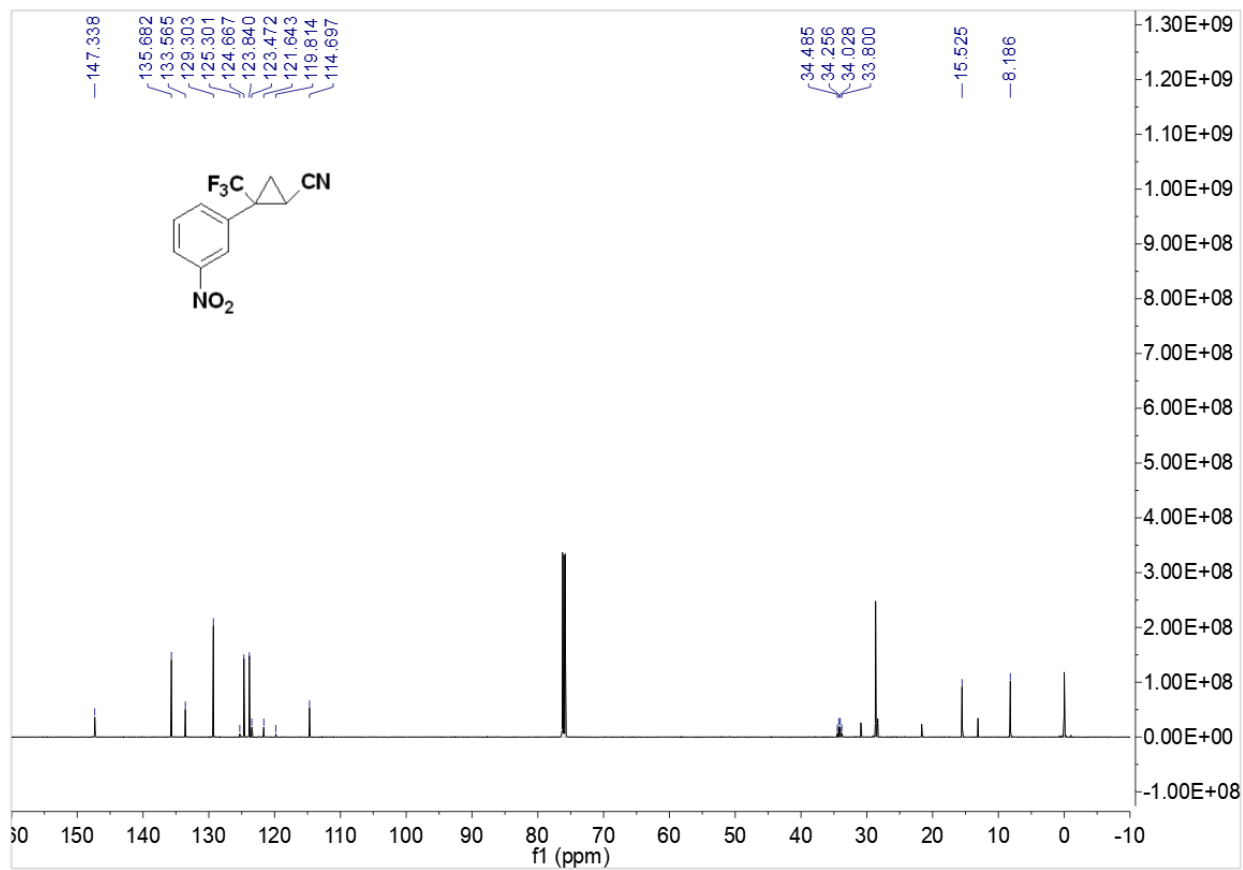

<sup>19</sup>F NMR spectrum of *cis-3ma*

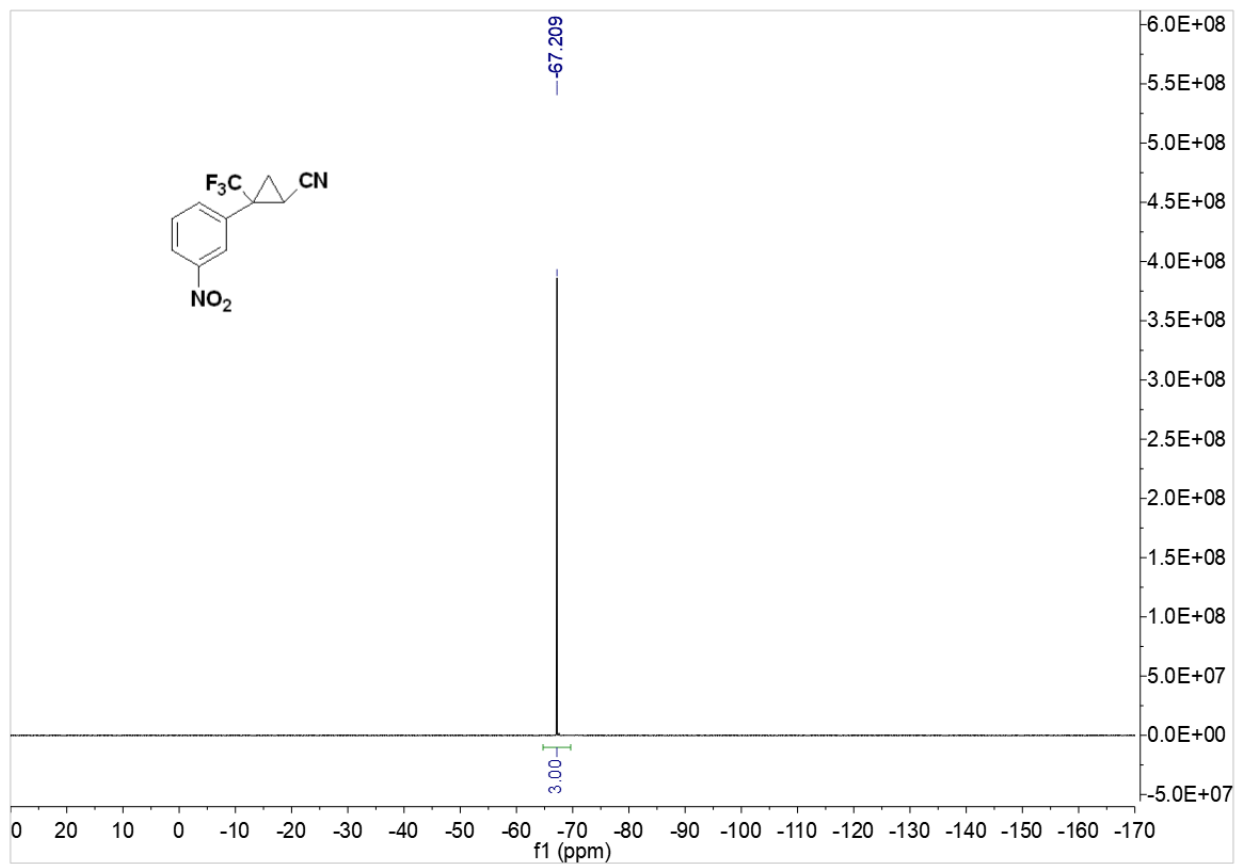



$^1\text{H}$  NMR spectrum of *trans*-3na

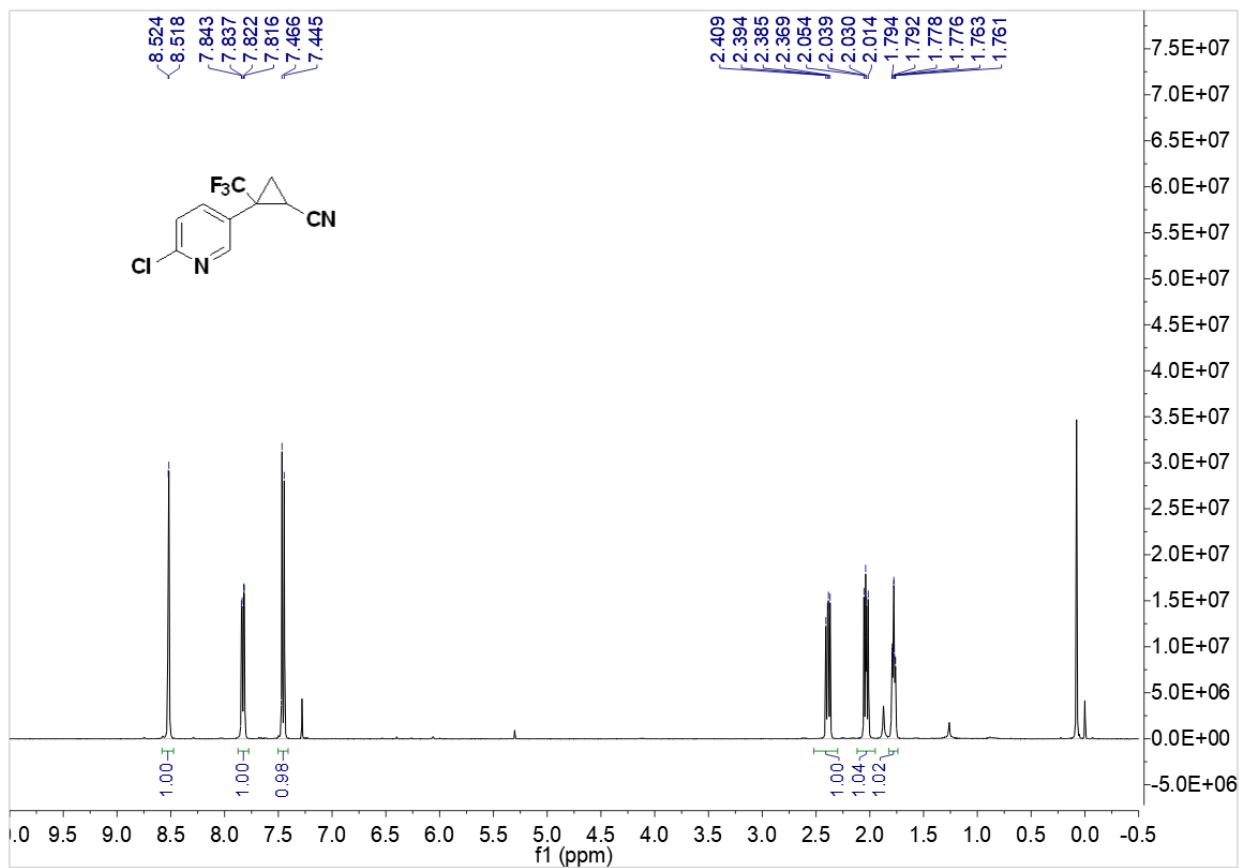

$^{13}\text{C}$  NMR spectrum of *trans*-3na

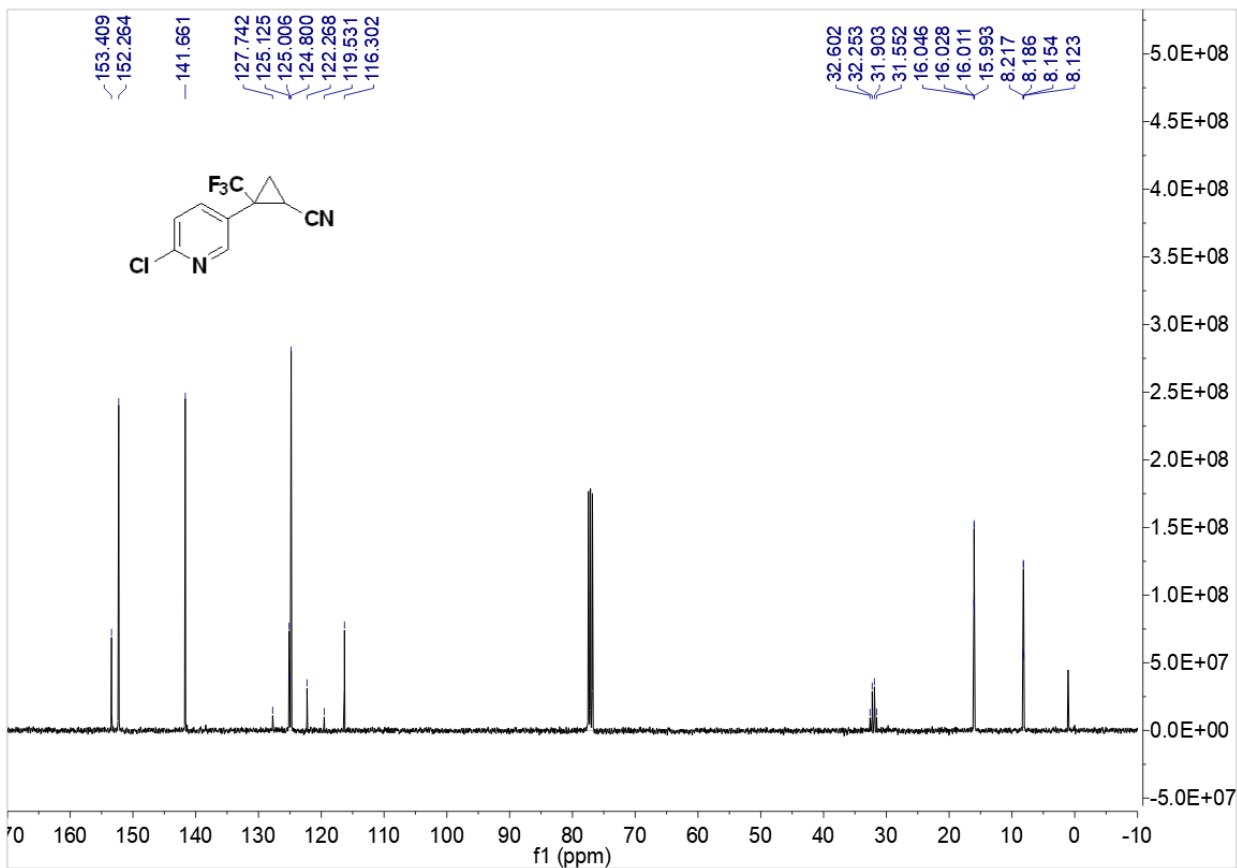

<sup>19</sup>F NMR spectrum of *trans*-3na

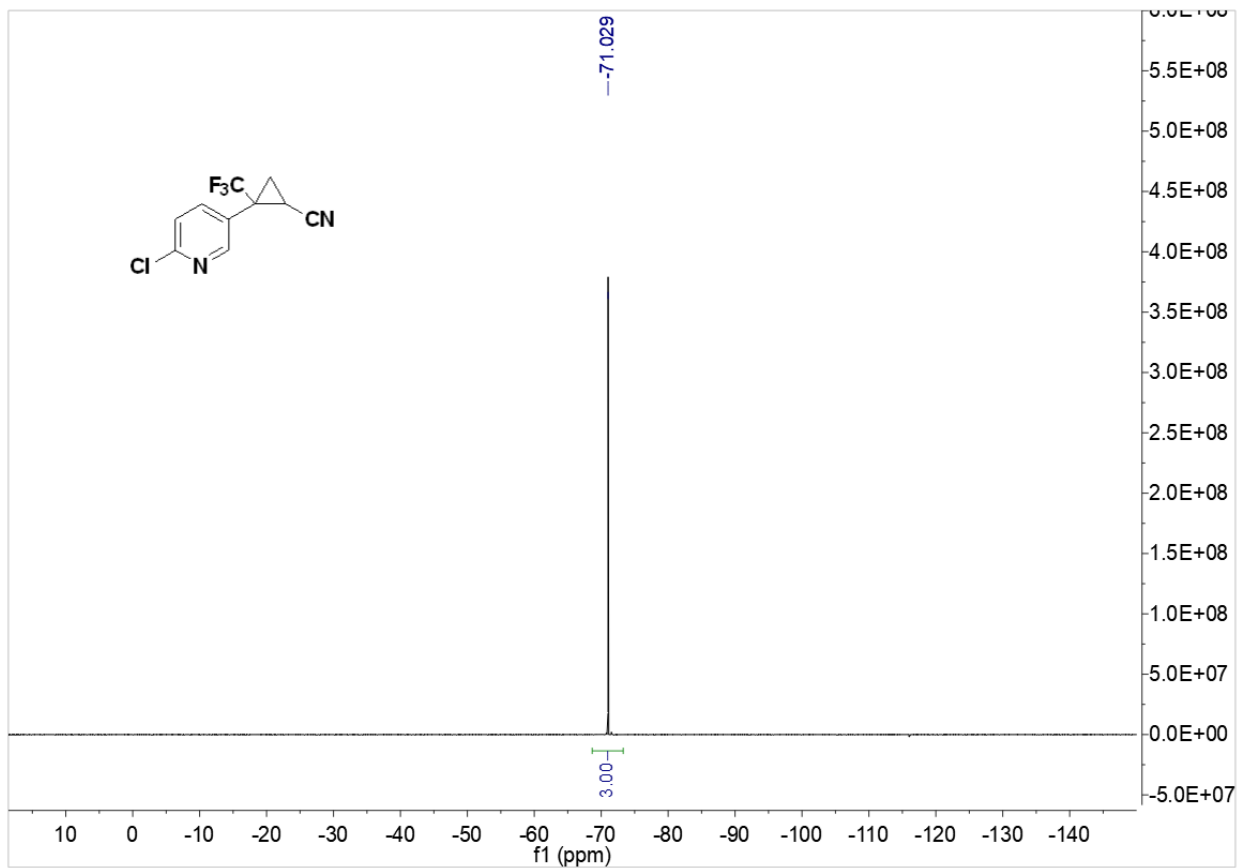

HRMS (EI) spectrum of *trans*-3na

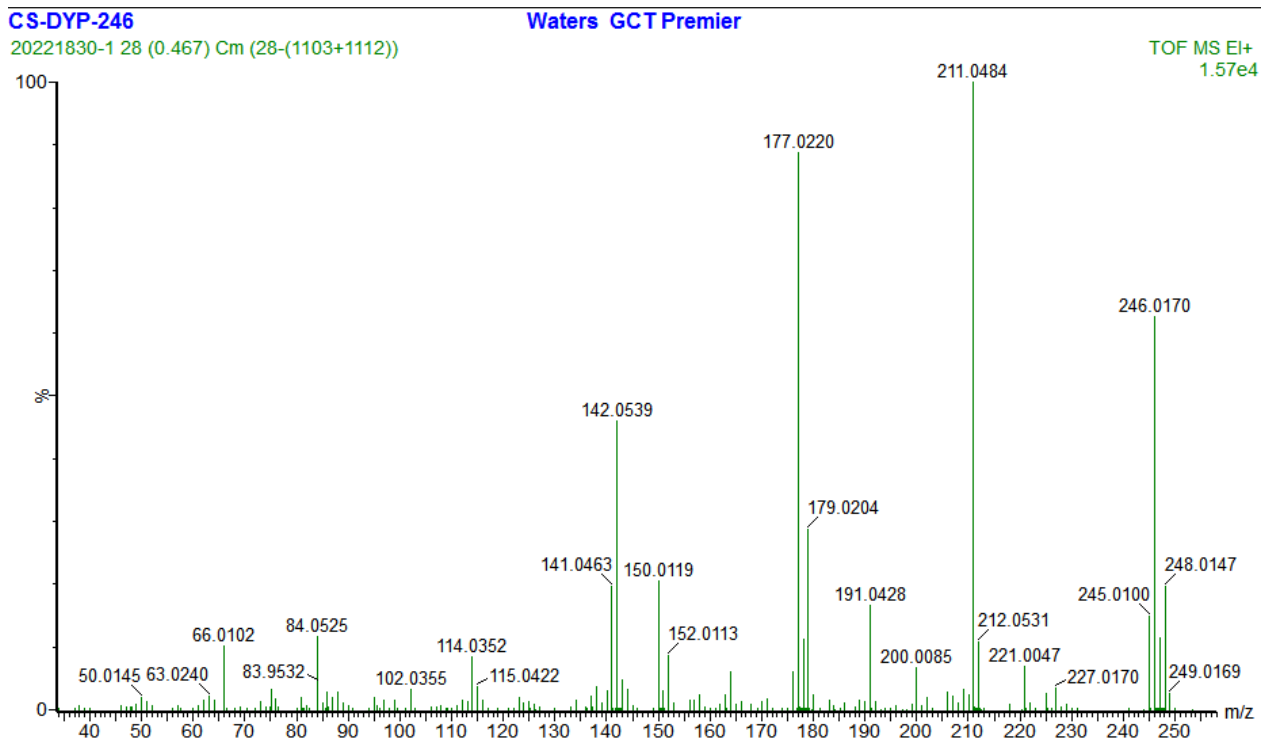

<sup>1</sup>H NMR spectrum of *cis-3na*

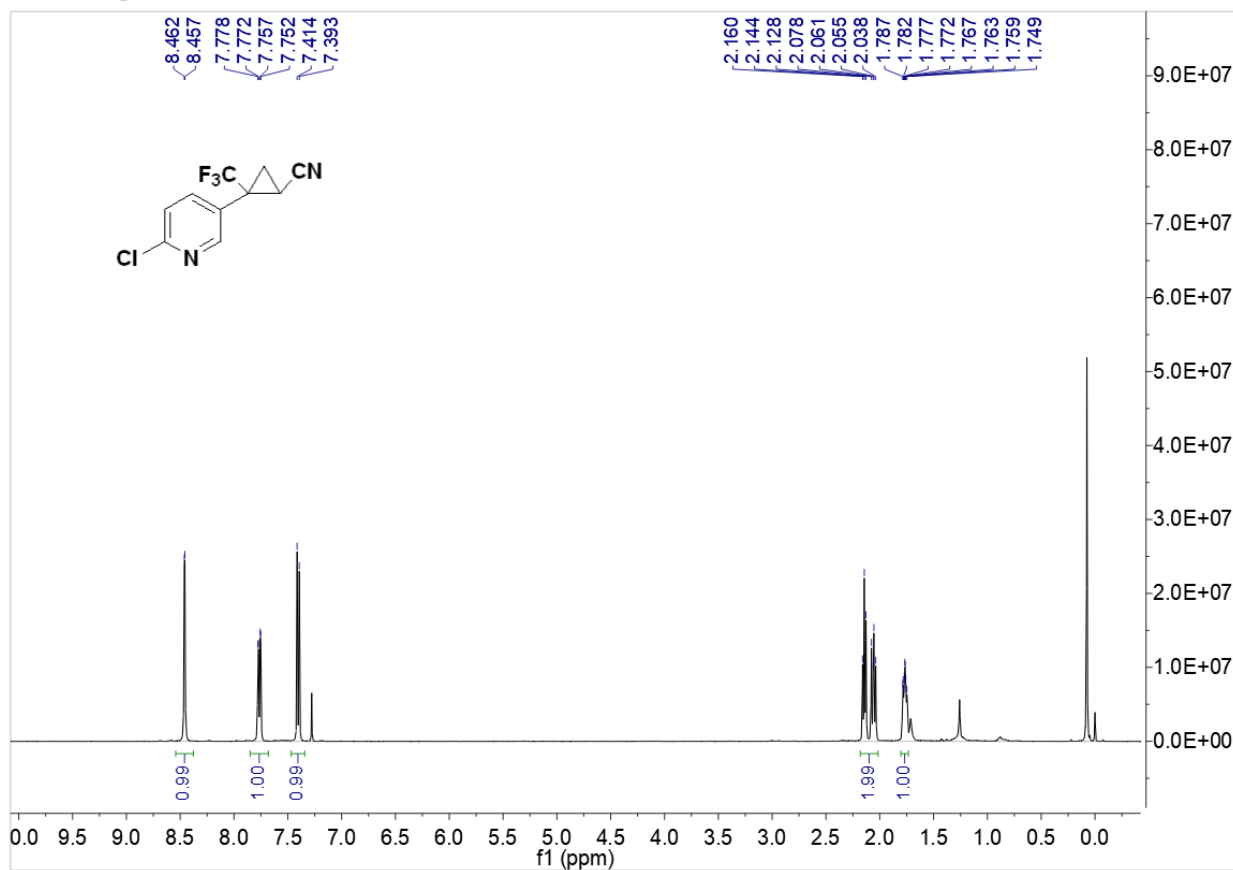

<sup>13</sup>C NMR spectrum of *cis-3na*

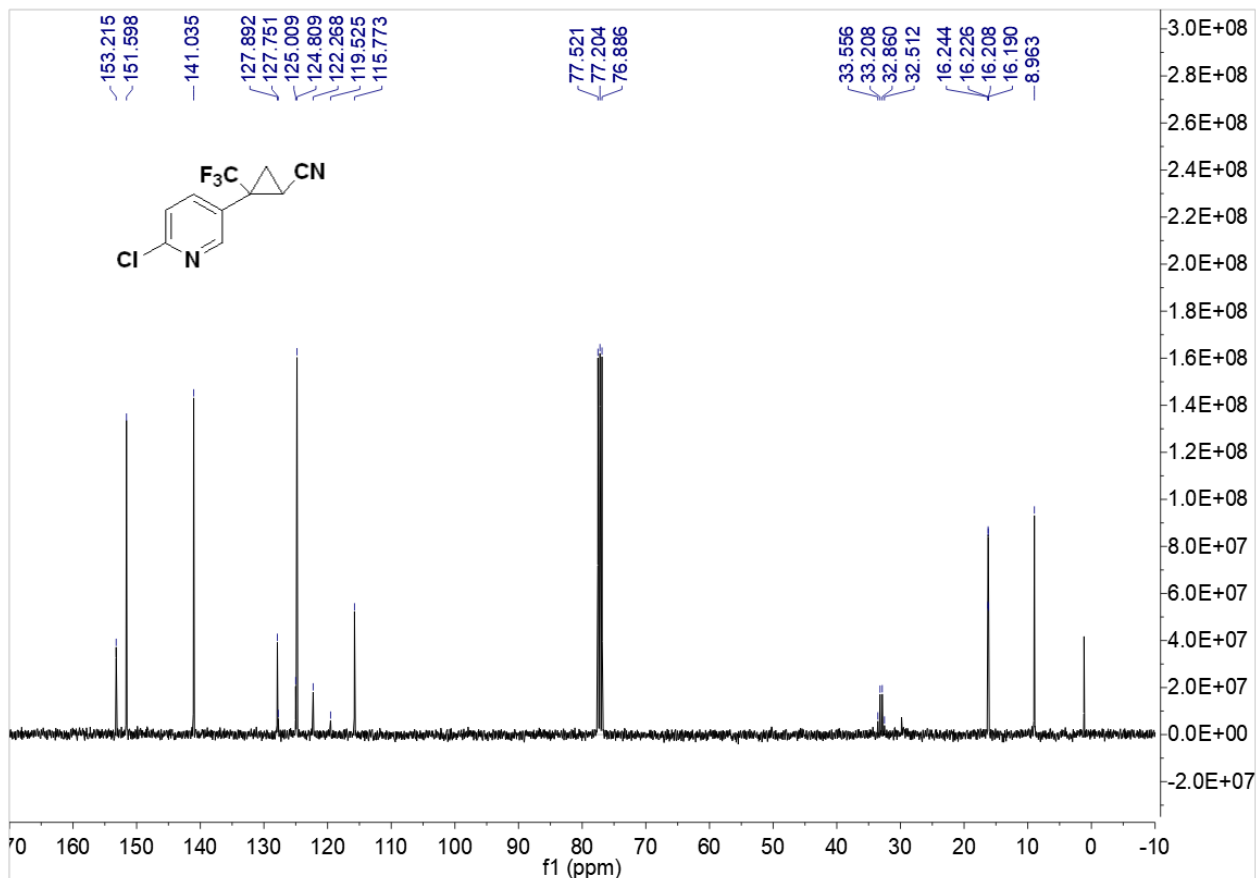

$^{19}\text{F}$  NMR spectrum of *cis*-3na

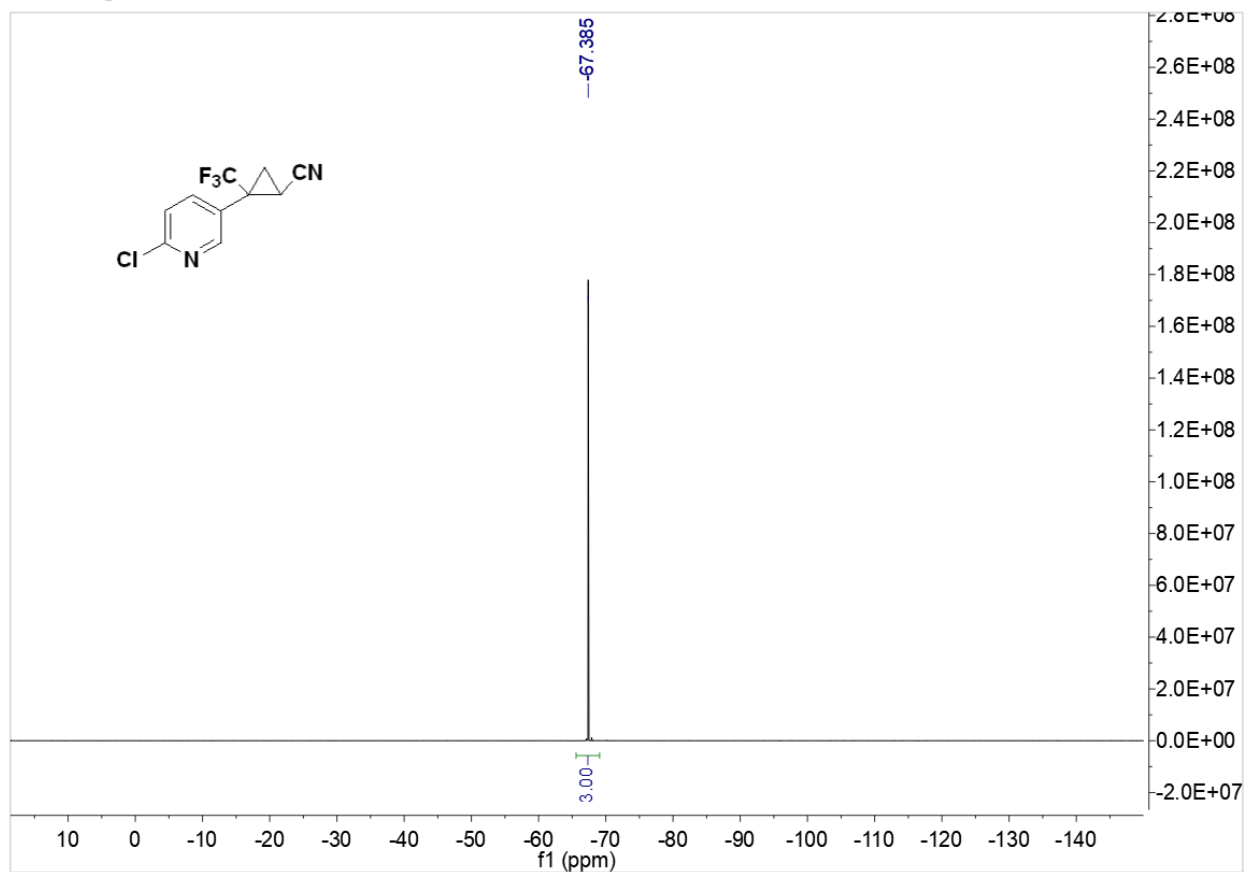

$^1\text{H}$  NMR spectrum of *trans*-3oa

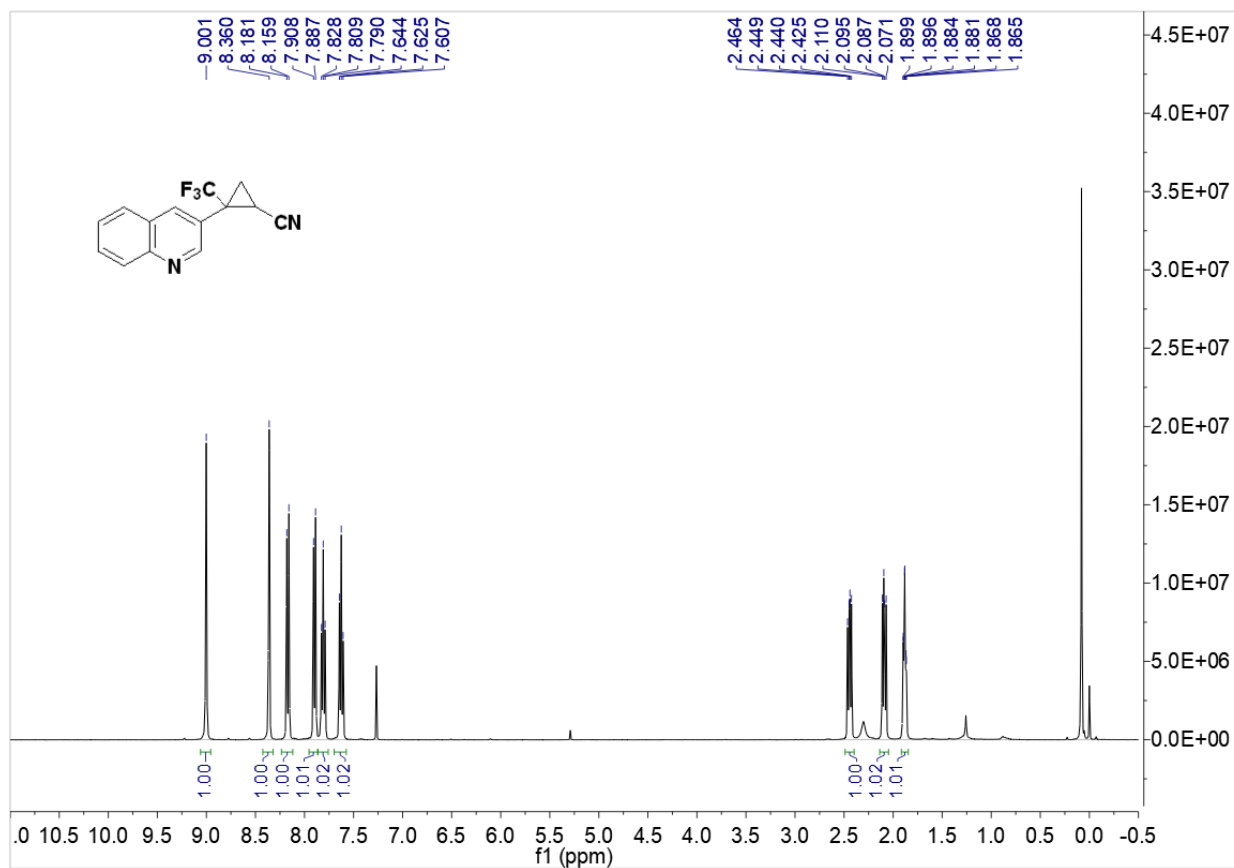

<sup>13</sup>C NMR spectrum of *trans*-30a

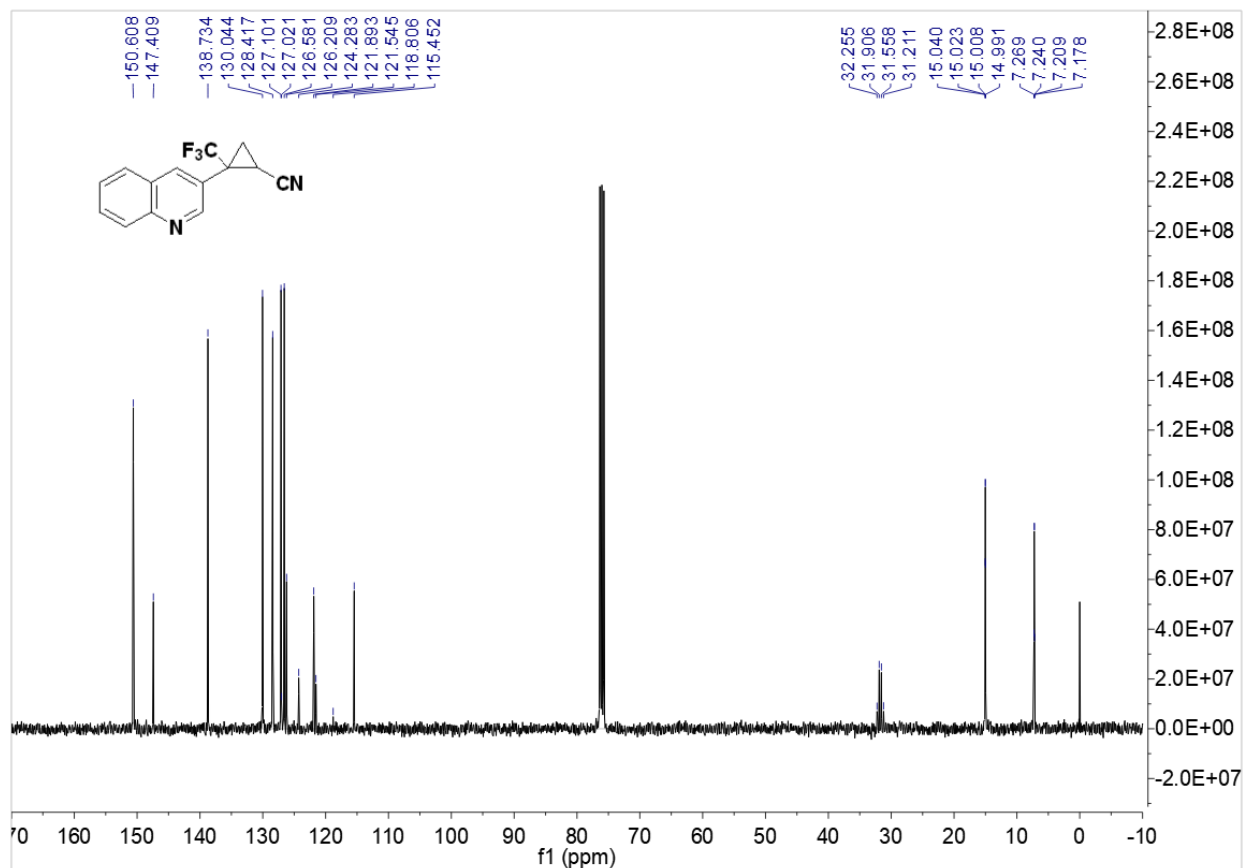

<sup>19</sup>F NMR spectrum of *trans*-30a

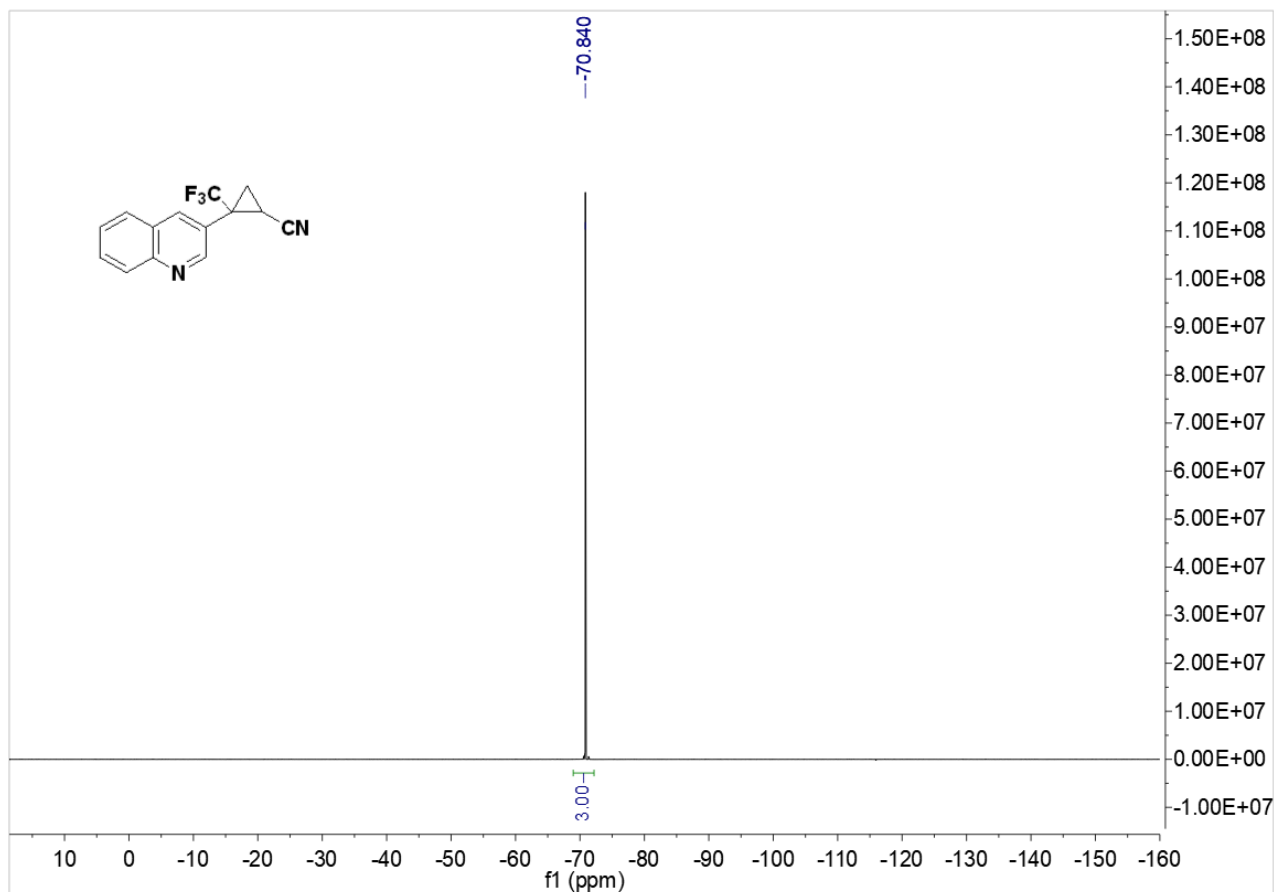

Elemental Composition Report

Single Mass Analysis

Tolerance = 20.0 PPM / DBE: min = -1.5, max = 50.0

Element prediction: Off

Number of isotope peaks used for i-FIT = 3

Monoisotopic Mass, Even Electron Ions

308 formula(e) evaluated with 1 results within limits (up to 50 closest results for each mass)

Elements Used:

C: 14-14 H: 10-10 N: 0-20 O: 0-20 F: 3-3 Na: 0-3

6

230410-1-19 6 (0.085)

1: TOF MS ES+  
8.05e+006

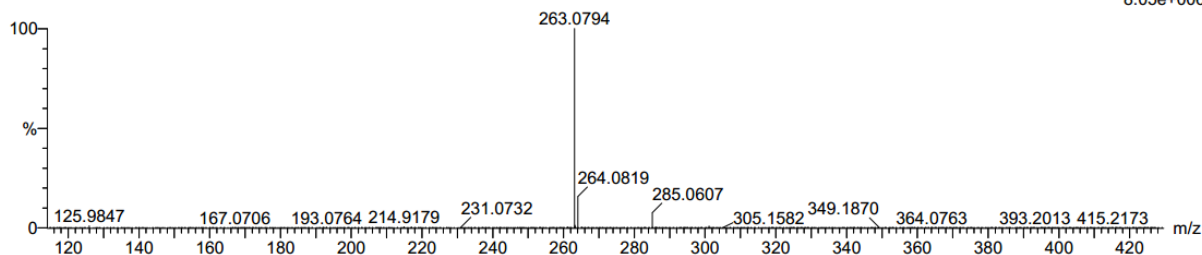

Minimum: -1.5  
Maximum: 5.0 20.0 50.0

| Mass     | Calc. Mass | mDa  | PPM  | DBE | i-FIT | Norm | Conf (%) | Formula       |
|----------|------------|------|------|-----|-------|------|----------|---------------|
| 263.0794 | 263.0796   | -0.2 | -0.8 | 9.5 | 253.4 | n/a  | n/a      | C14 H10 N2 F3 |

<sup>1</sup>H NMR spectrum of *trans*-3pa

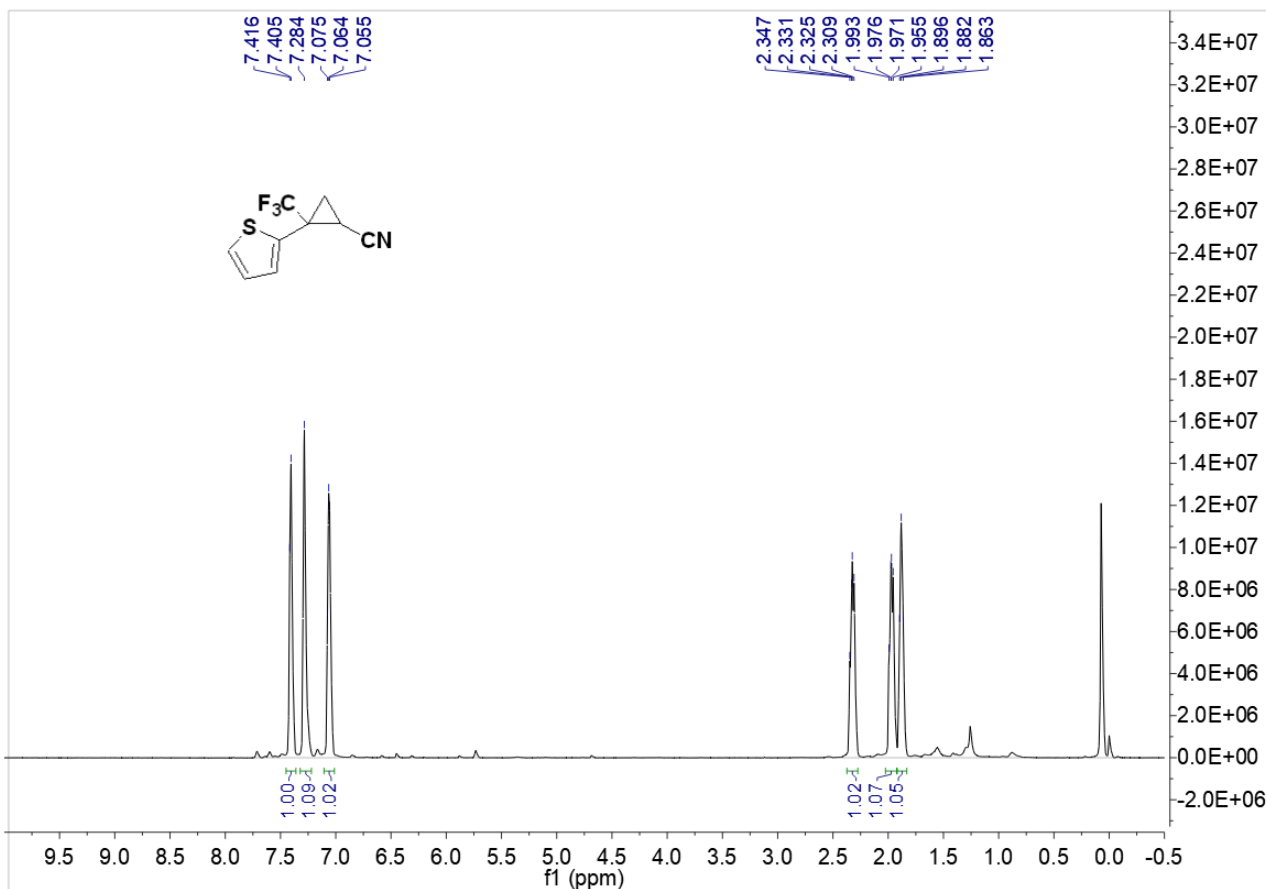

$^{13}\text{C}$  NMR spectrum of *trans*-3pa

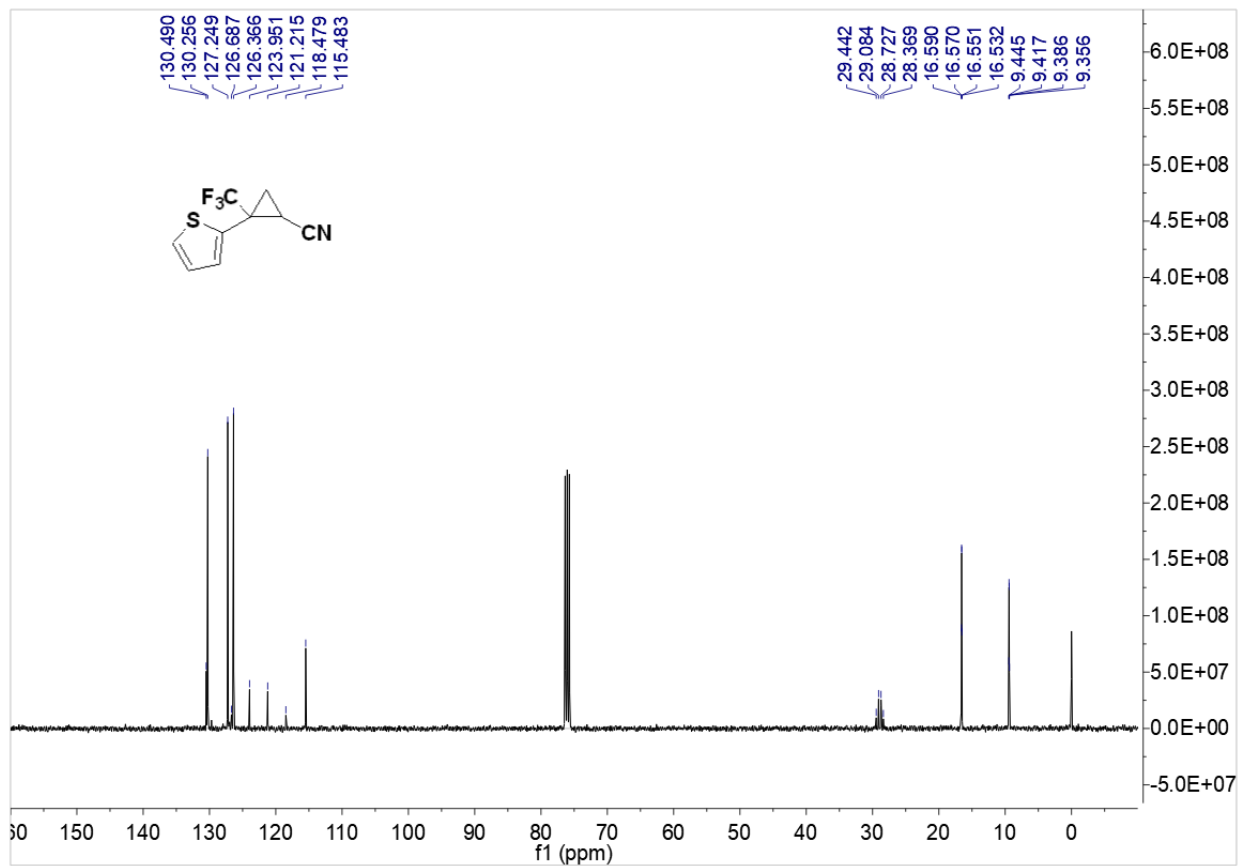

$^{19}\text{F}$  NMR spectrum of *trans*-3pa

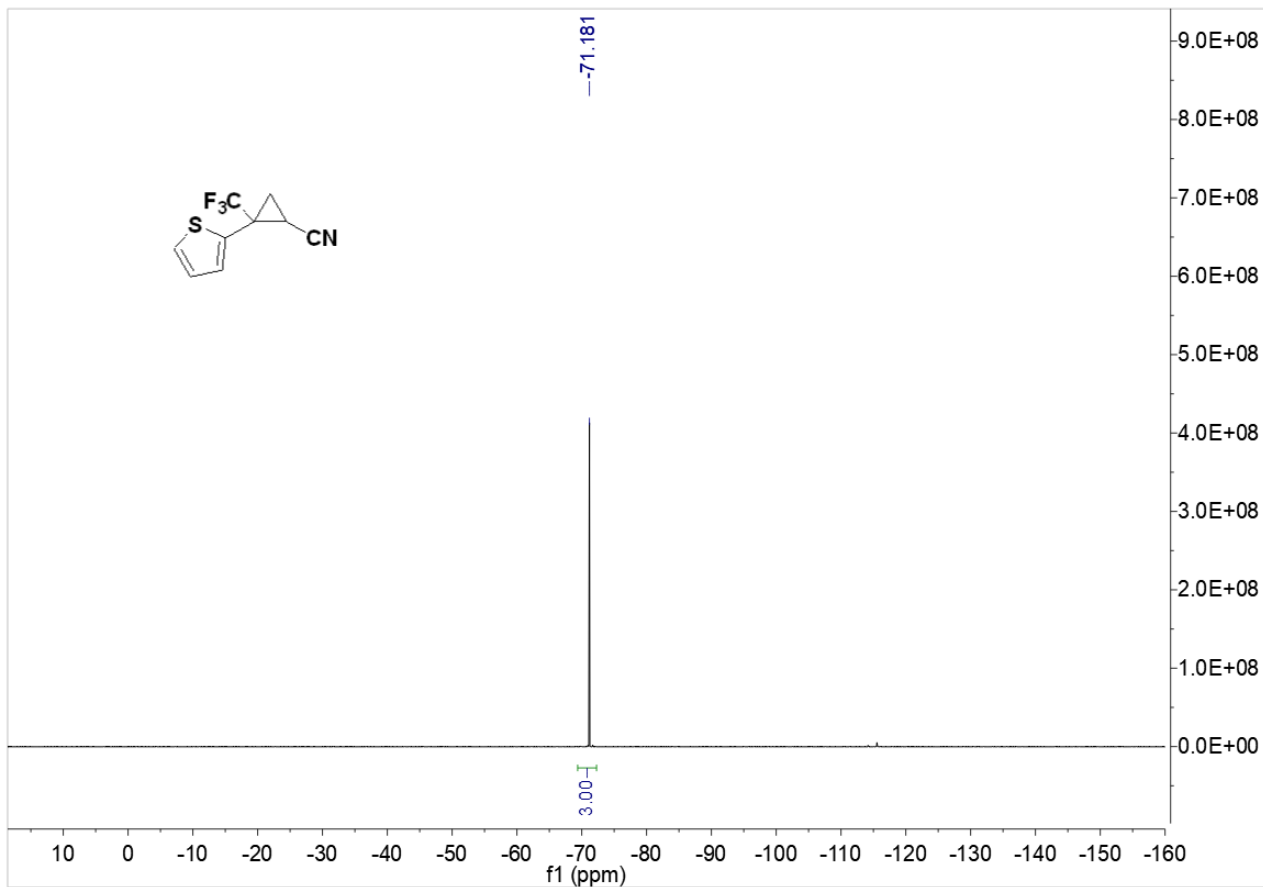

**Elemental Composition Report**

**Single Mass Analysis**

Tolerance = 20.0 PPM / DBE: min = -1.5, max = 50.0

Element prediction: Off

Number of isotope peaks used for i-FIT = 3

Monoisotopic Mass, Even Electron Ions

111 formula(e) evaluated with 1 results within limits (up to 50 closest results for each mass)

Elements Used:

C: 9-9 H: 7-7 N: 0-20 O: 0-20 F: 3-3 Na: 0-3 S: 1-1

6

230410-1-17 39 (0.432)

1: TOF MS ES+  
5.93e+001

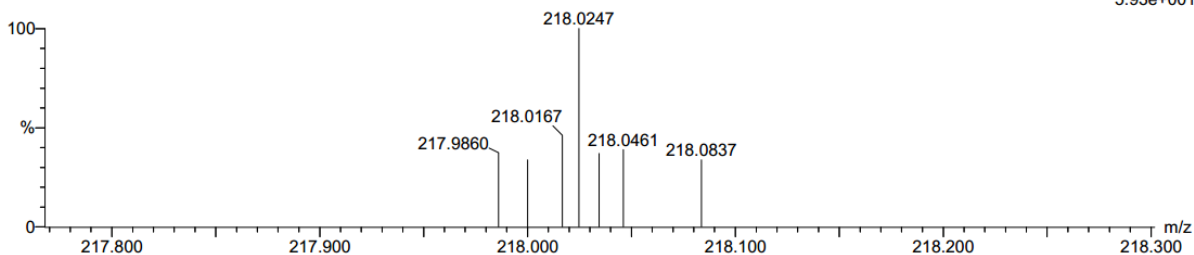

Minimum: -1.5  
Maximum: 5.0 20.0 50.0

| Mass     | Calc. Mass | mDa  | PPM  | DBE | i-FIT | Norm | Conf (%) | Formula      |
|----------|------------|------|------|-----|-------|------|----------|--------------|
| 218.0247 | 218.0251   | -0.4 | -1.8 | 5.5 | 32.5  | n/a  | n/a      | C9 H7 N F3 S |

<sup>1</sup>H NMR spectrum of *cis-3pa*

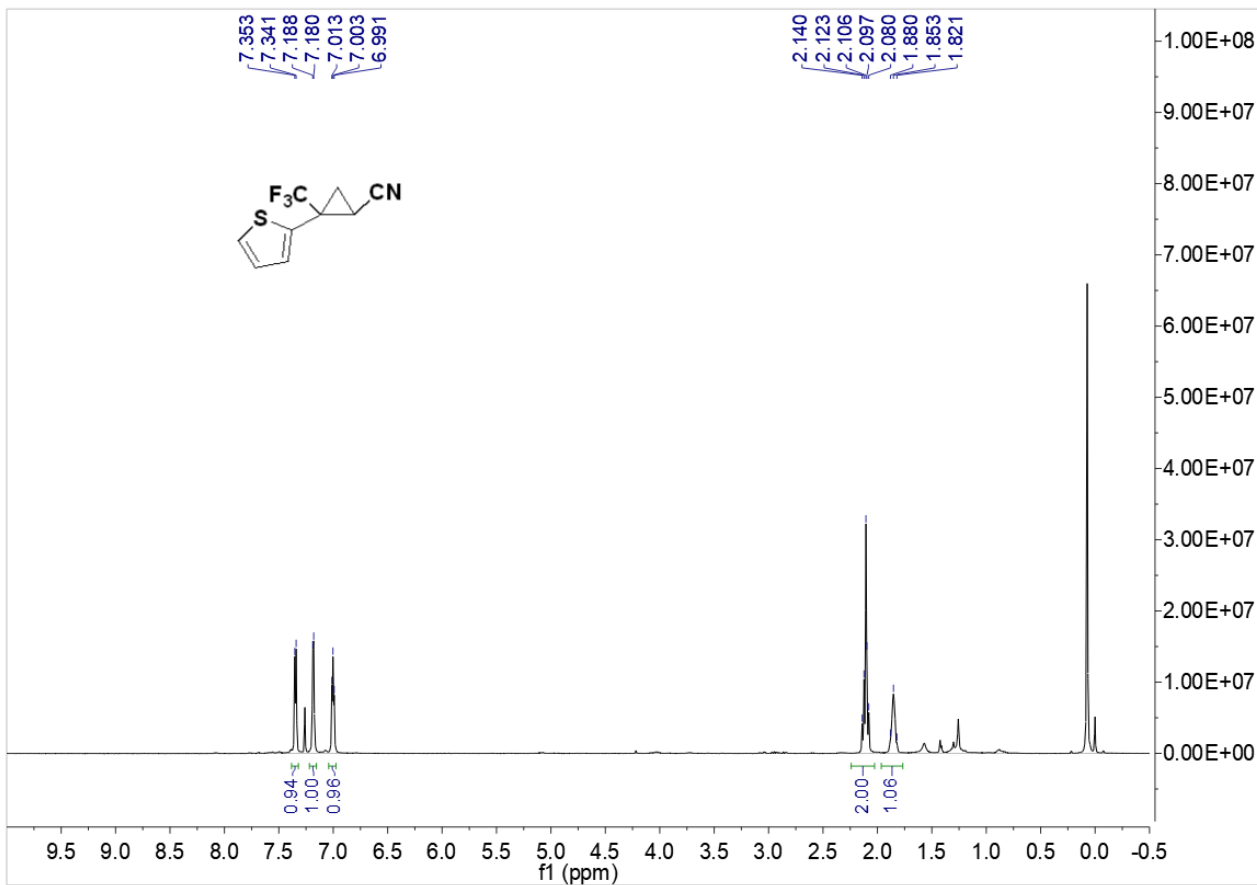



<sup>13</sup>C NMR spectrum of *cis*-3pa

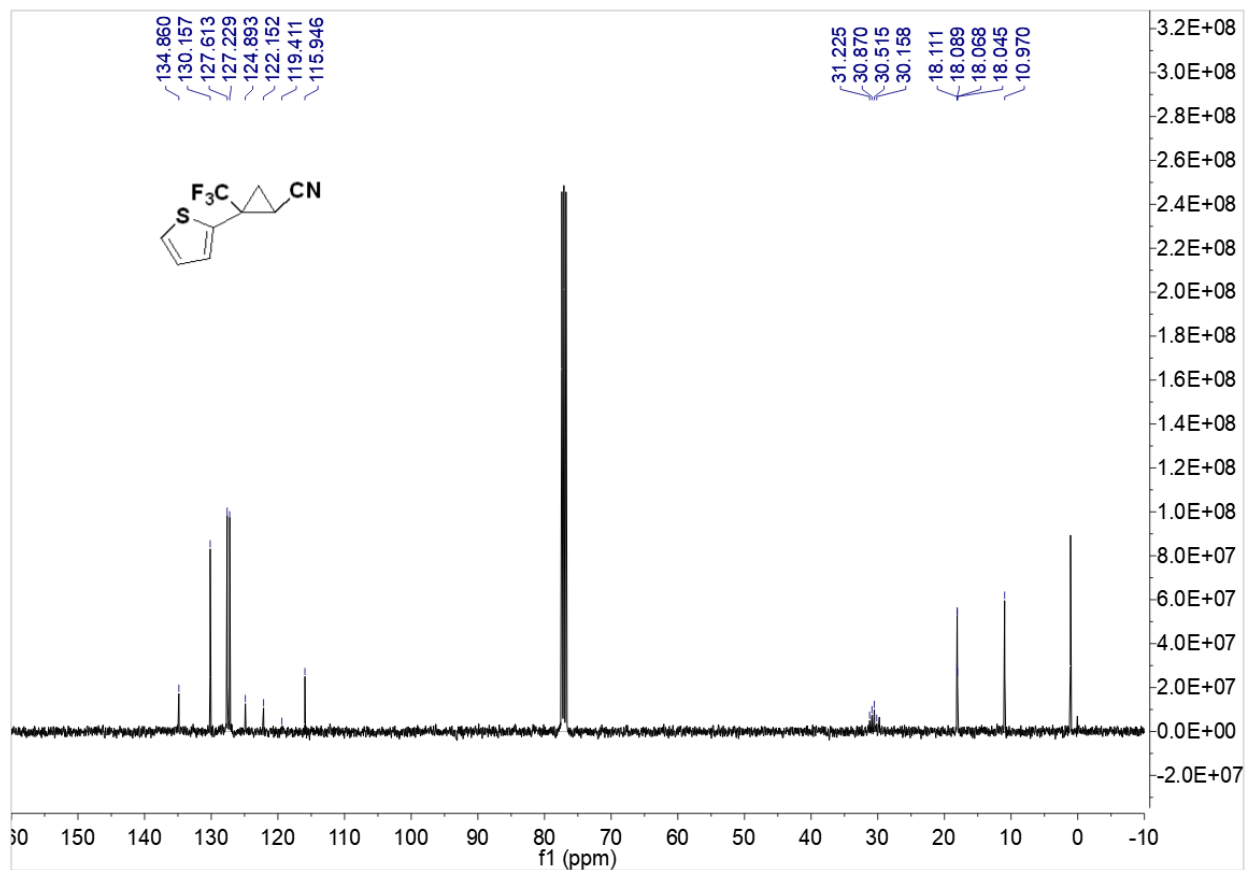

<sup>19</sup>F NMR spectrum of *cis*-3pa

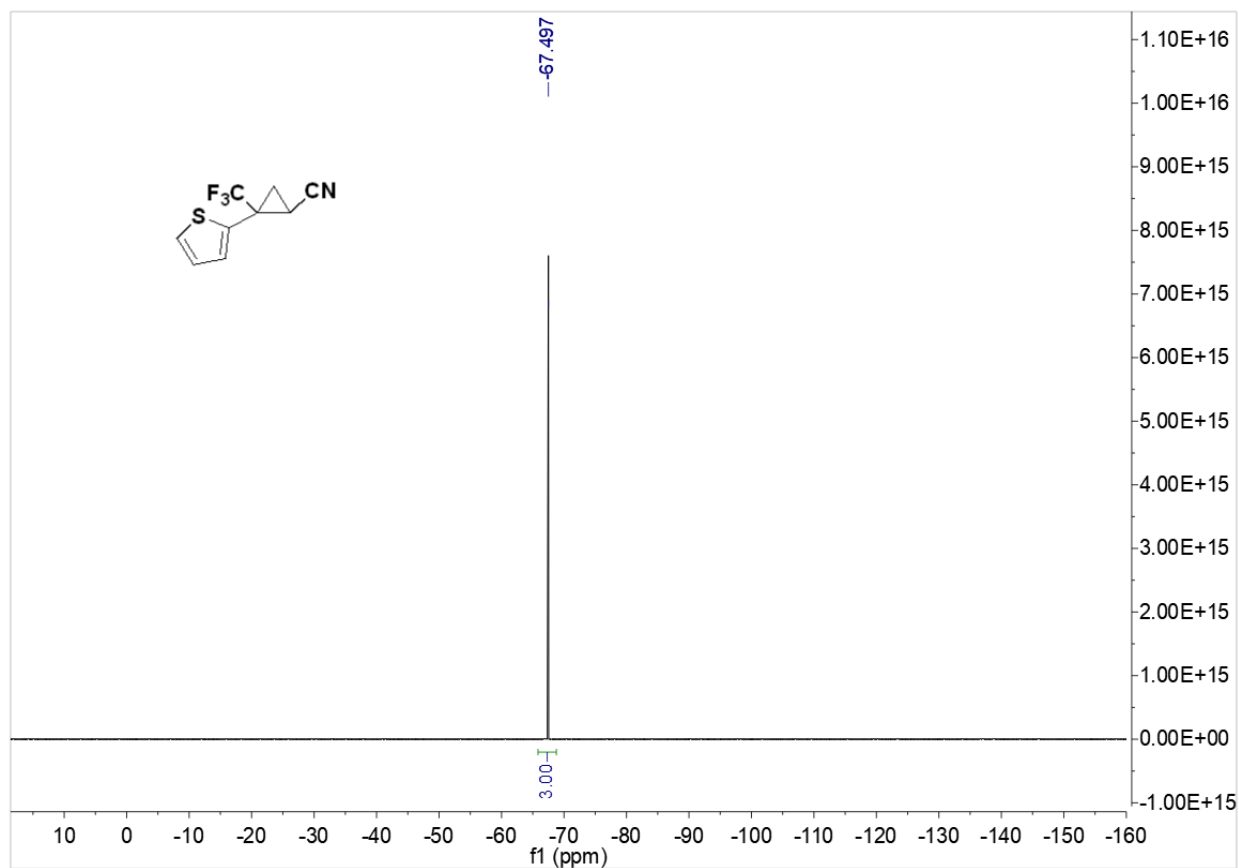

$^1\text{H}$  NMR spectrum of **3ac**

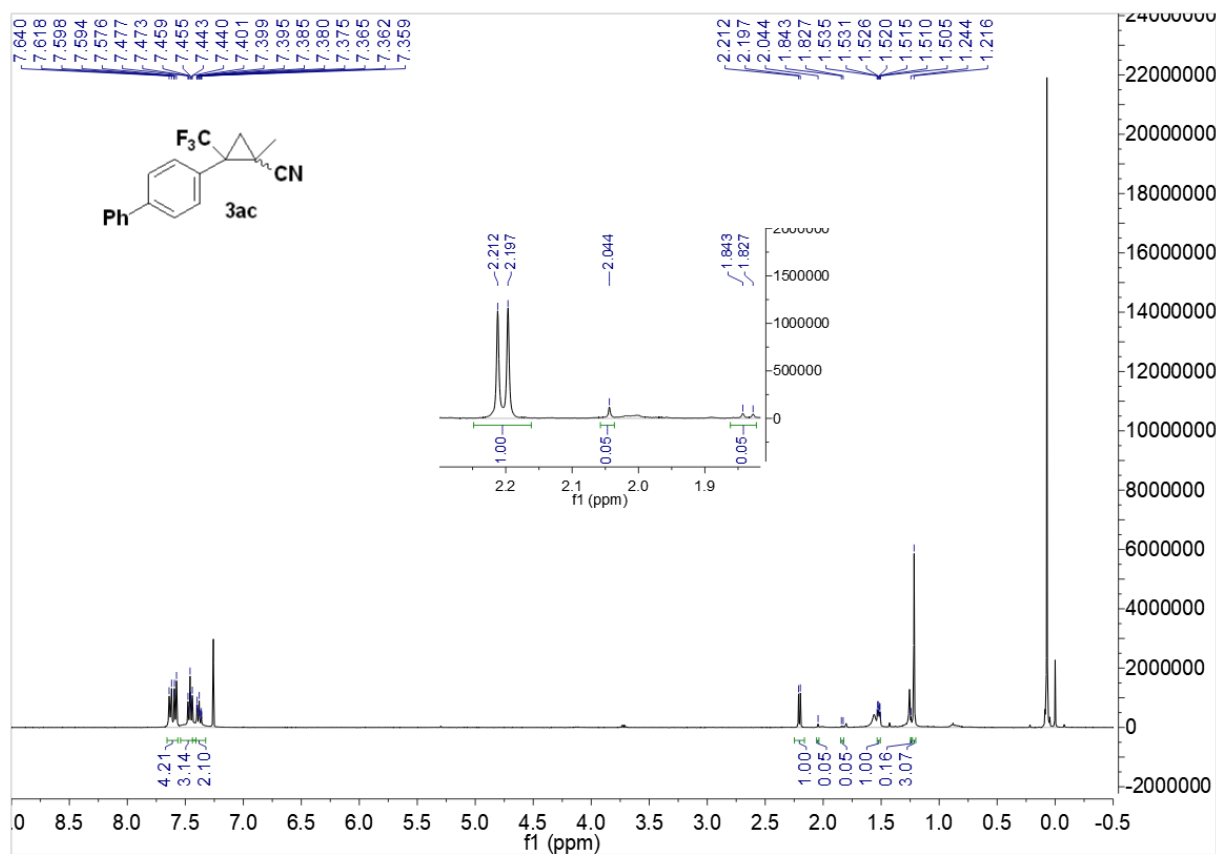

$^{13}\text{C}$  NMR spectrum of **3ac**

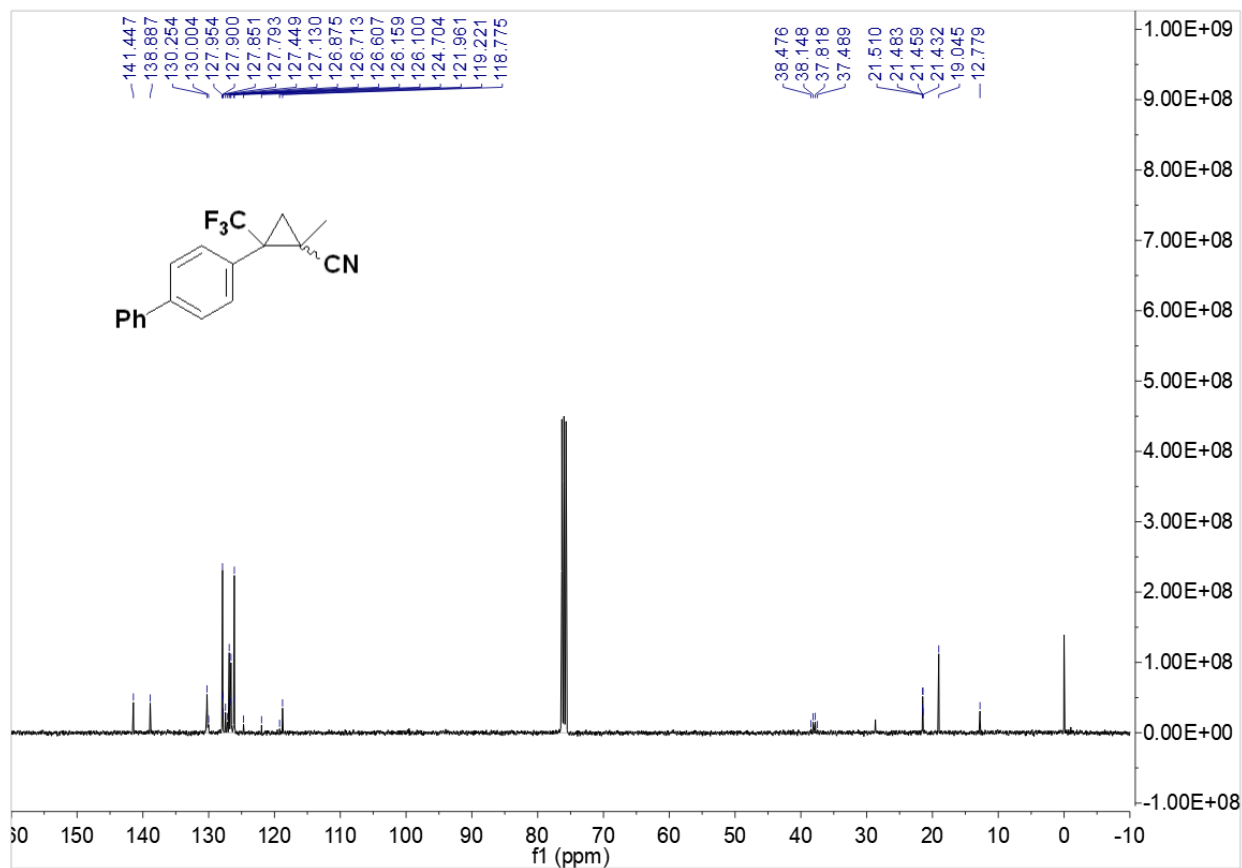

<sup>19</sup>F NMR spectrum of **3ac**

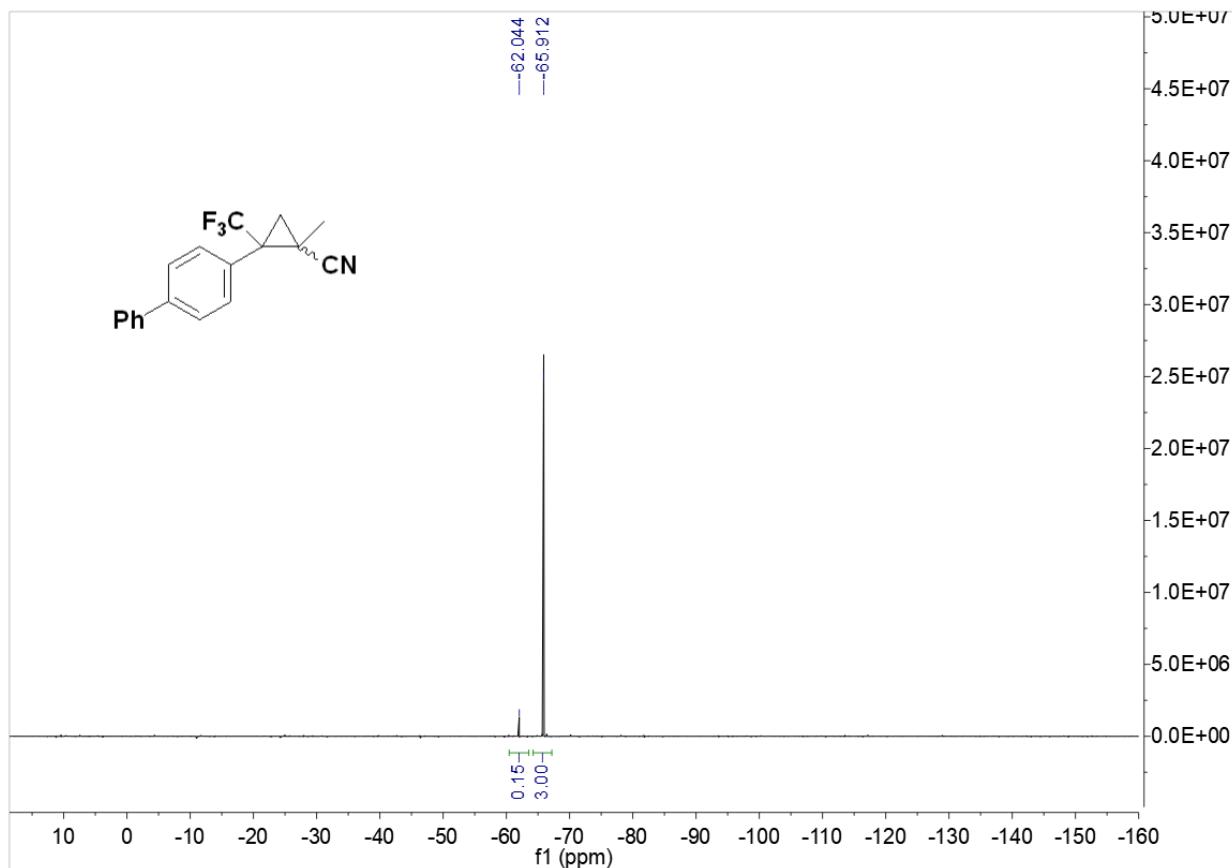

HRMS (ESI) spectrum of **3ac**

Elemental Composition Report

Page 1

Single Mass Analysis

Tolerance = 20.0 PPM / DBE: min = -1.5, max = 50.0

Element prediction: Off

Number of isotope peaks used for i-FIT = 3

Monoisotopic Mass, Even Electron Ions

312 formula(e) evaluated with 1 results within limits (up to 50 closest results for each mass)

Elements Used:

C: 18-18 H: 14-14 N: 0-30 O: 0-100 F: 3-3 Na: 0-1

3

230512-2-3 5 (0.076)

1: TOF MS ES+  
1.71e+006

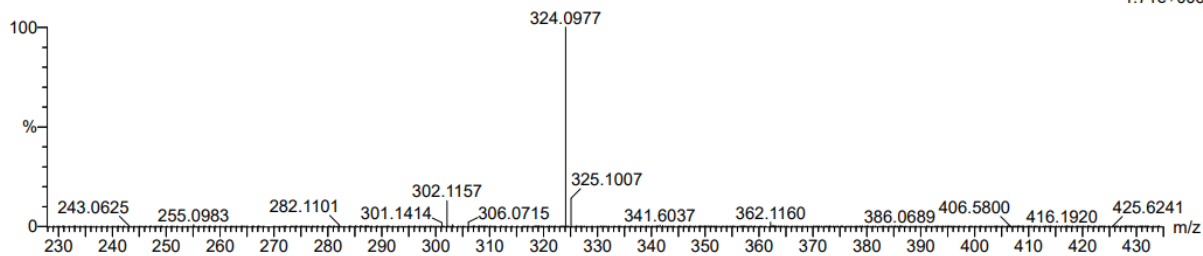

Minimum: -1.5  
Maximum: 5.0 20.0 50.0

| Mass     | Calc. Mass | mDa | PPM | DBE  | i-FIT | Norm | Conf (%) | Formula         |
|----------|------------|-----|-----|------|-------|------|----------|-----------------|
| 324.0977 | 324.0976   | 0.1 | 0.3 | 10.5 | 153.3 | n/a  | n/a      | C18 H14 N F3 Na |

<sup>1</sup>H NMR spectrum of **3hc-isomer 1**

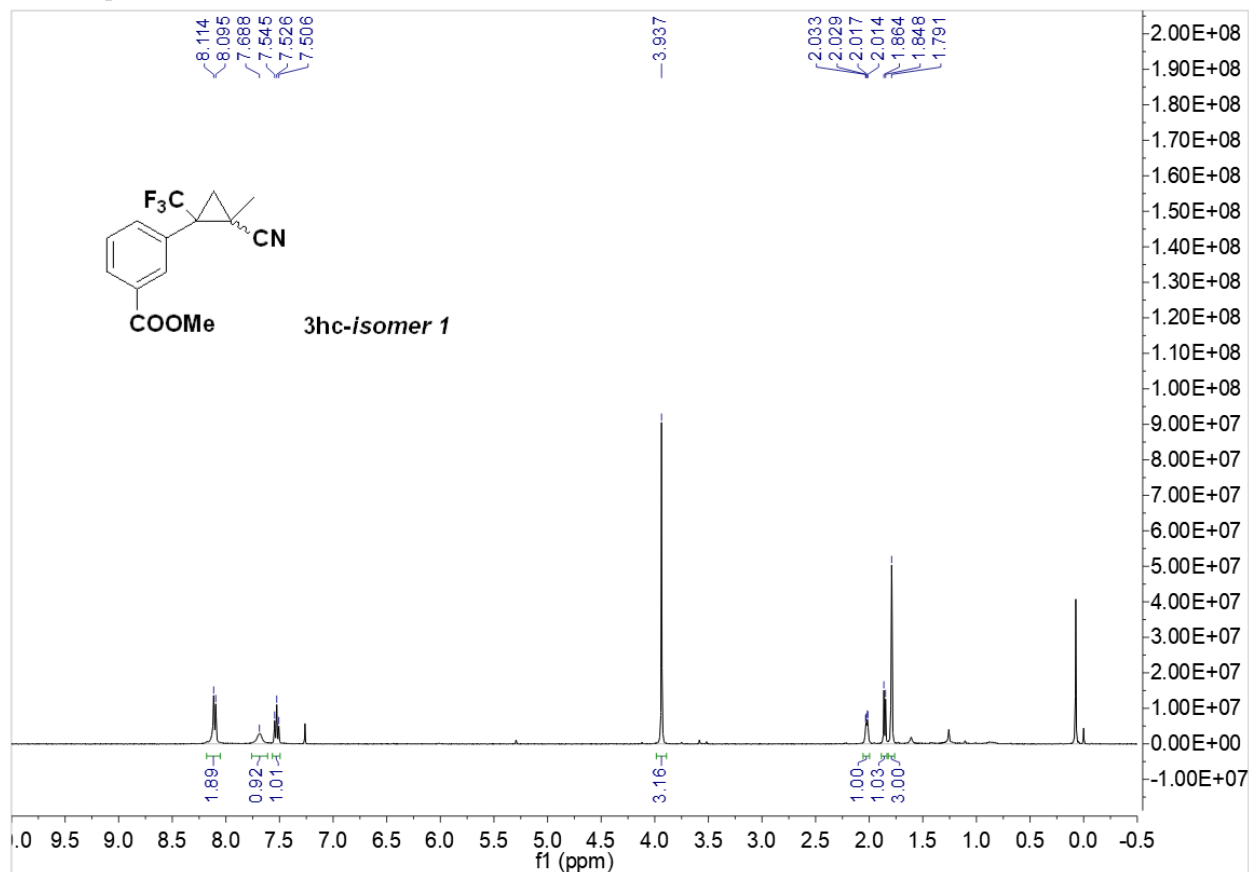

<sup>13</sup>C NMR spectrum of **3hc-isomer 1**

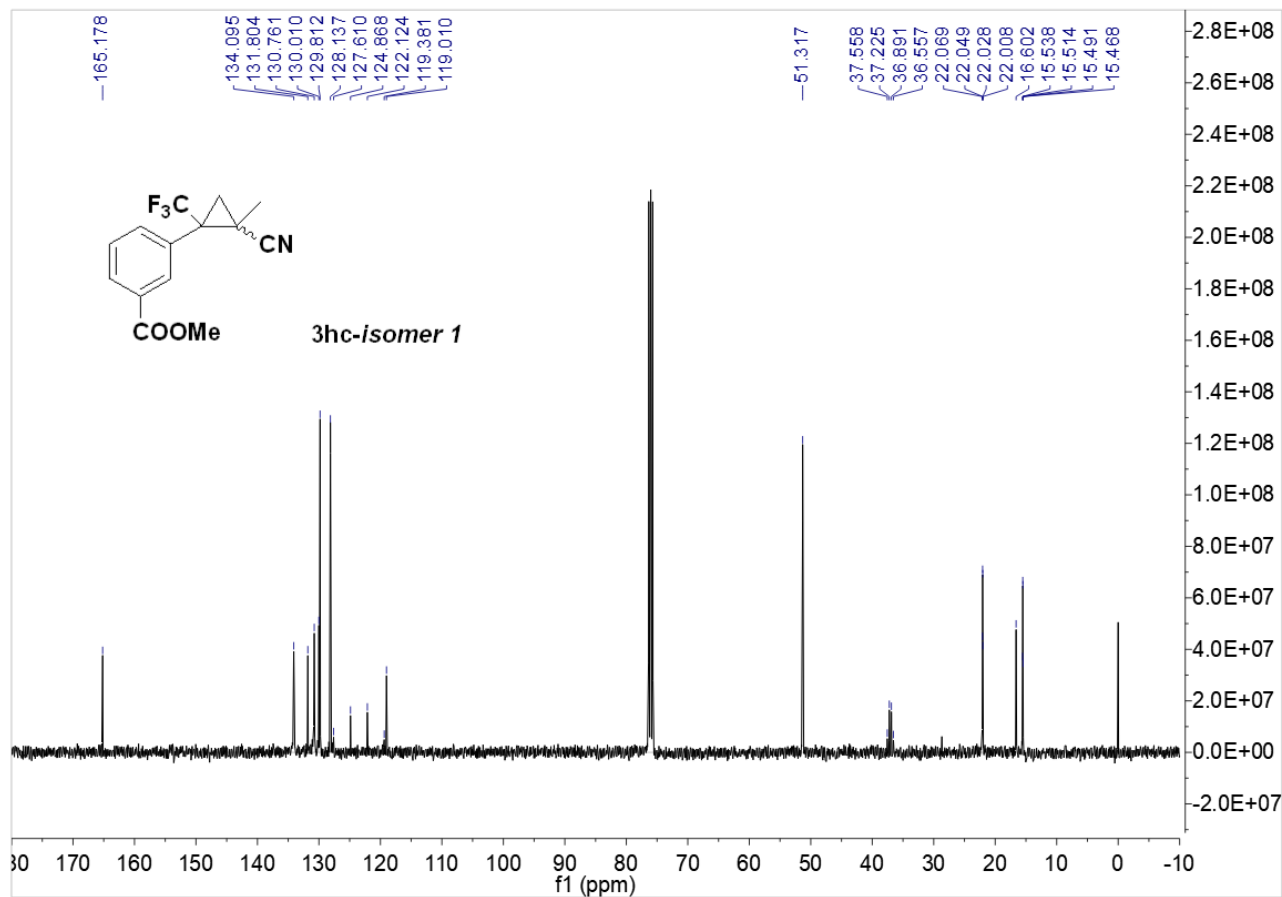

<sup>19</sup>F NMR spectrum of **3hc-isomer 1**

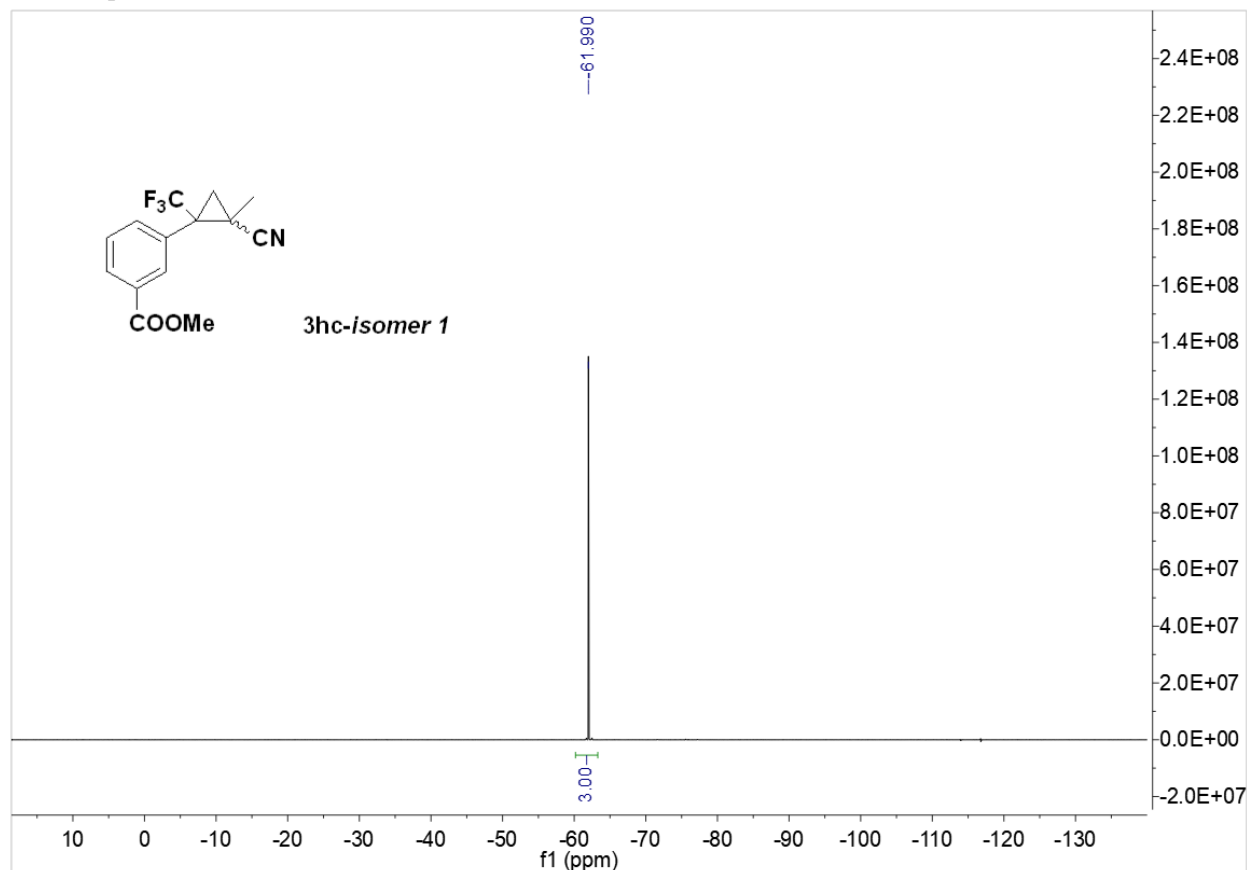

HRMS (ESI) spectrum of **3hc-isomer 1**

Elemental Composition Report

Page 1

Single Mass Analysis

Tolerance = 20.0 PPM / DBE: min = -1.5, max = 50.0

Element prediction: Off

Number of isotope peaks used for i-FIT = 3

Monoisotopic Mass, Even Electron Ions

256 formula(e) evaluated with 1 results within limits (up to 50 closest results for each mass)

Elements Used:

C: 14-14 H: 12-12 N: 0-30 O: 0-100 F: 3-3 Na: 0-1

3

230512-2-2 8 (0.102)

1: TOF MS ES+  
3.52e+006

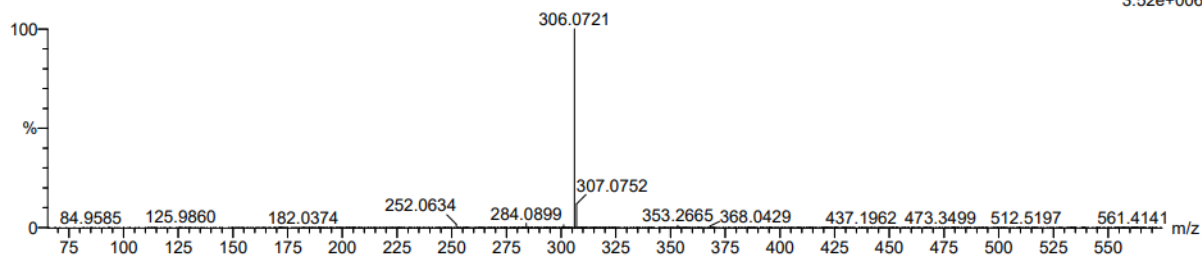

Minimum: -1.5  
Maximum: 5.0 20.0 50.0

| Mass     | Calc. Mass | mDa | PPM | DBE | i-FIT | Norm | Conf(%) | Formula            |
|----------|------------|-----|-----|-----|-------|------|---------|--------------------|
| 306.0721 | 306.0718   | 0.3 | 1.0 | 7.5 | 117.0 | n/a  | n/a     | C14 H12 N 02 F3 Na |

<sup>1</sup>H NMR spectrum of **3hc-isomer 2**

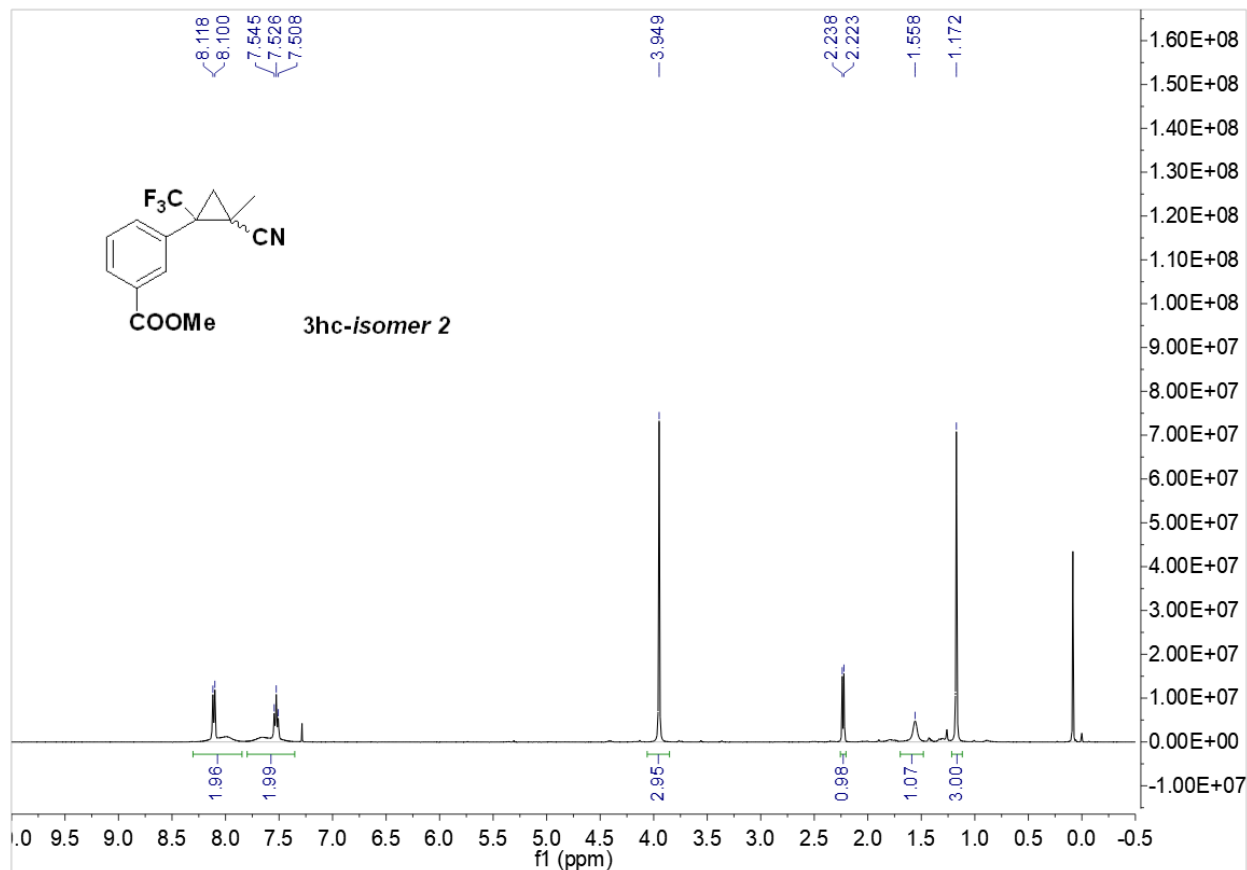

<sup>13</sup>C NMR spectrum of **3hc-isomer 2**

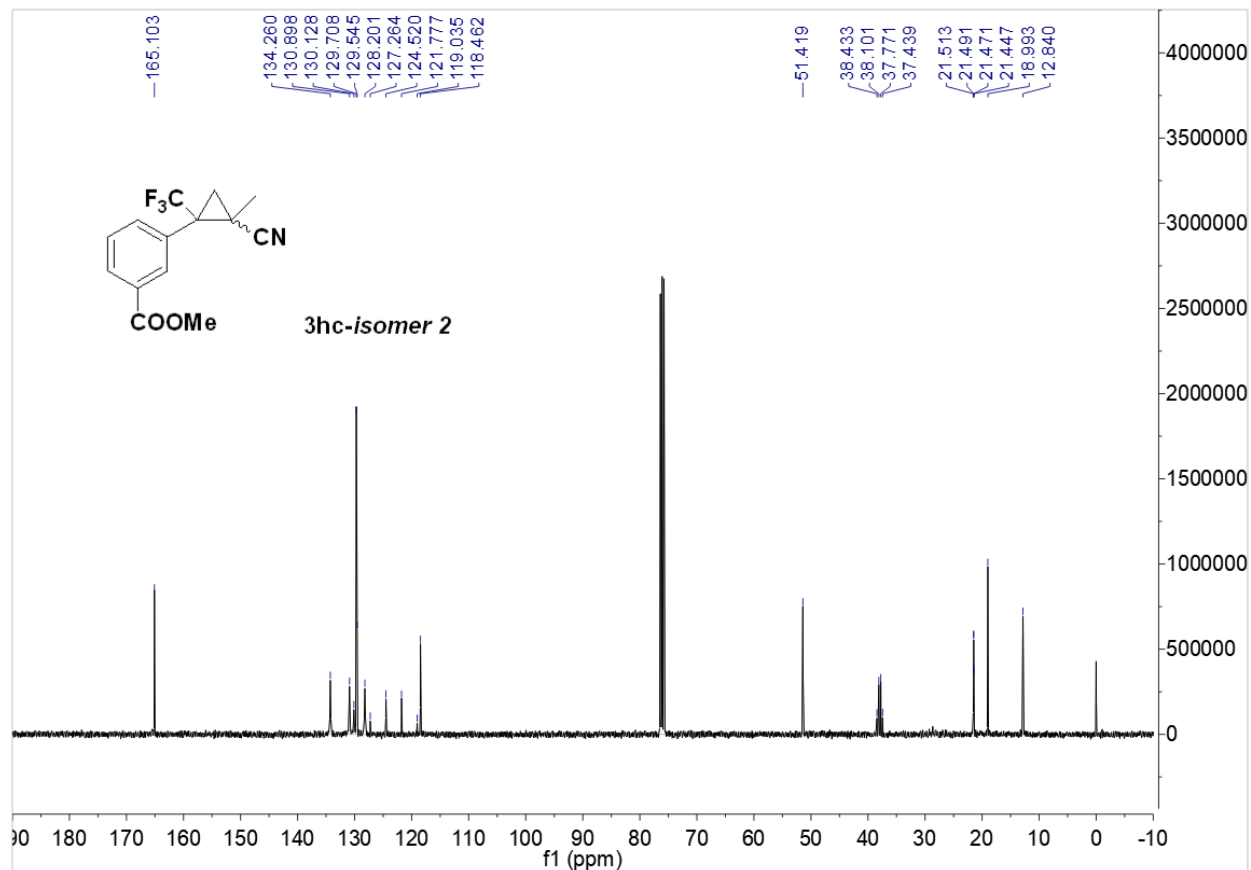

$^{19}\text{F}$  NMR spectrum of **3hc-isomer 2**

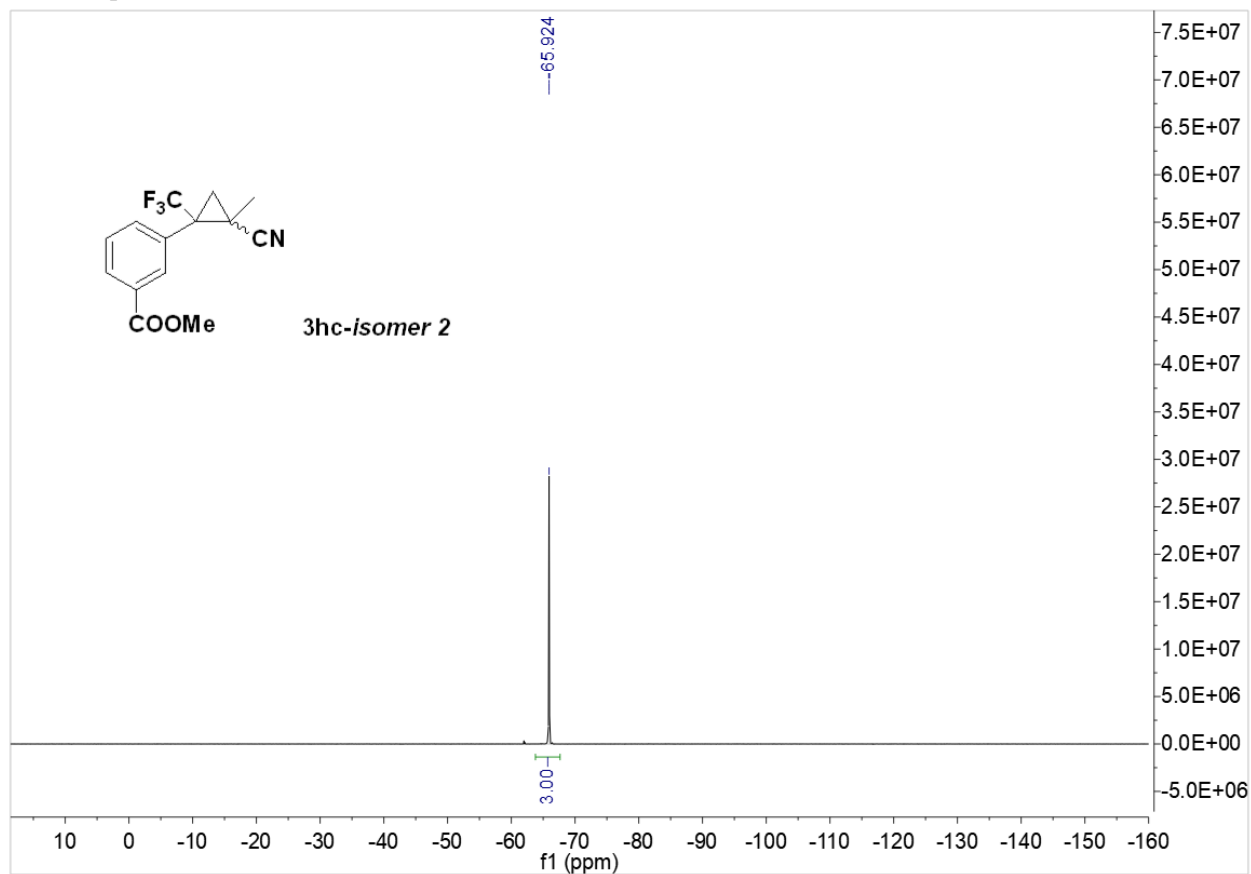

$^1\text{H}$  NMR spectrum of **3nc-isomer 1**

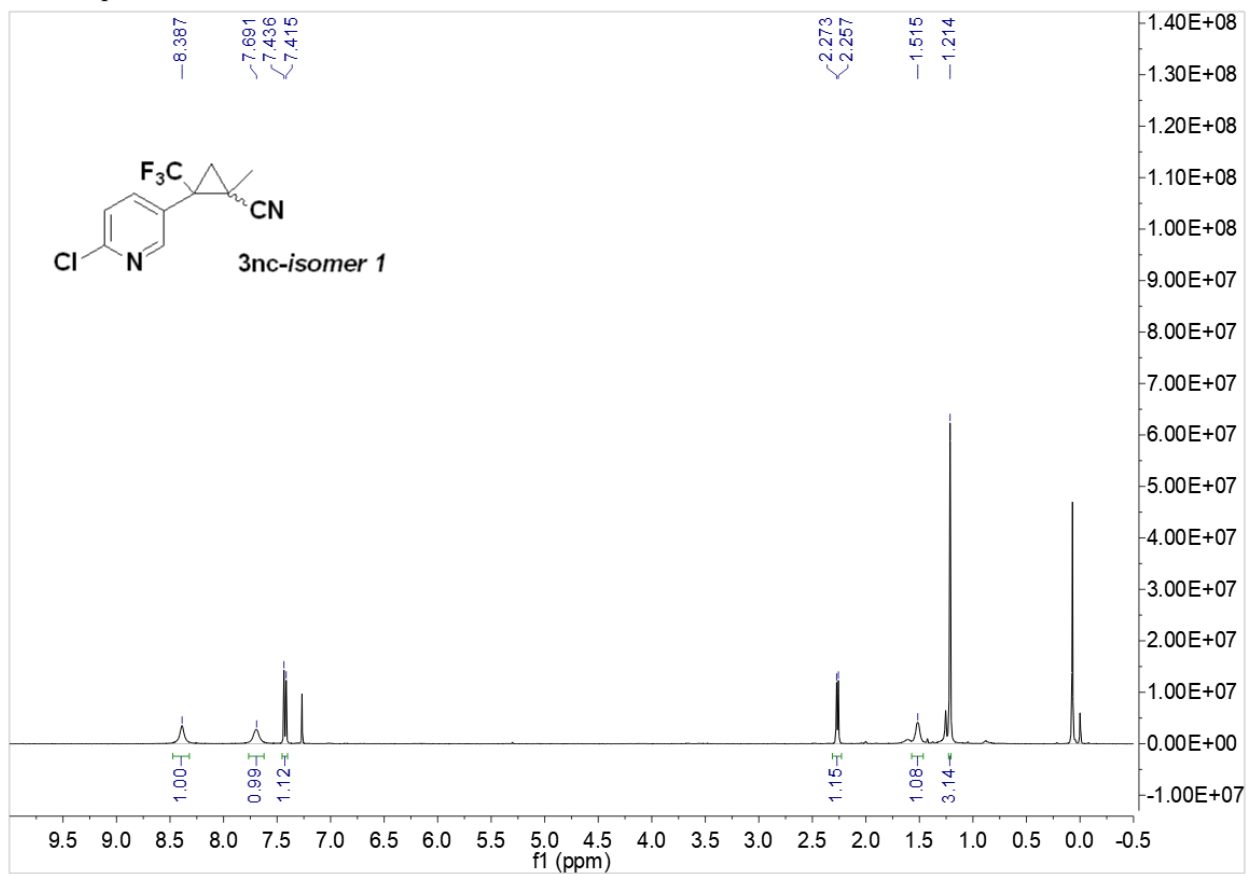

<sup>13</sup>C NMR spectrum of **3nc-isomer 1**

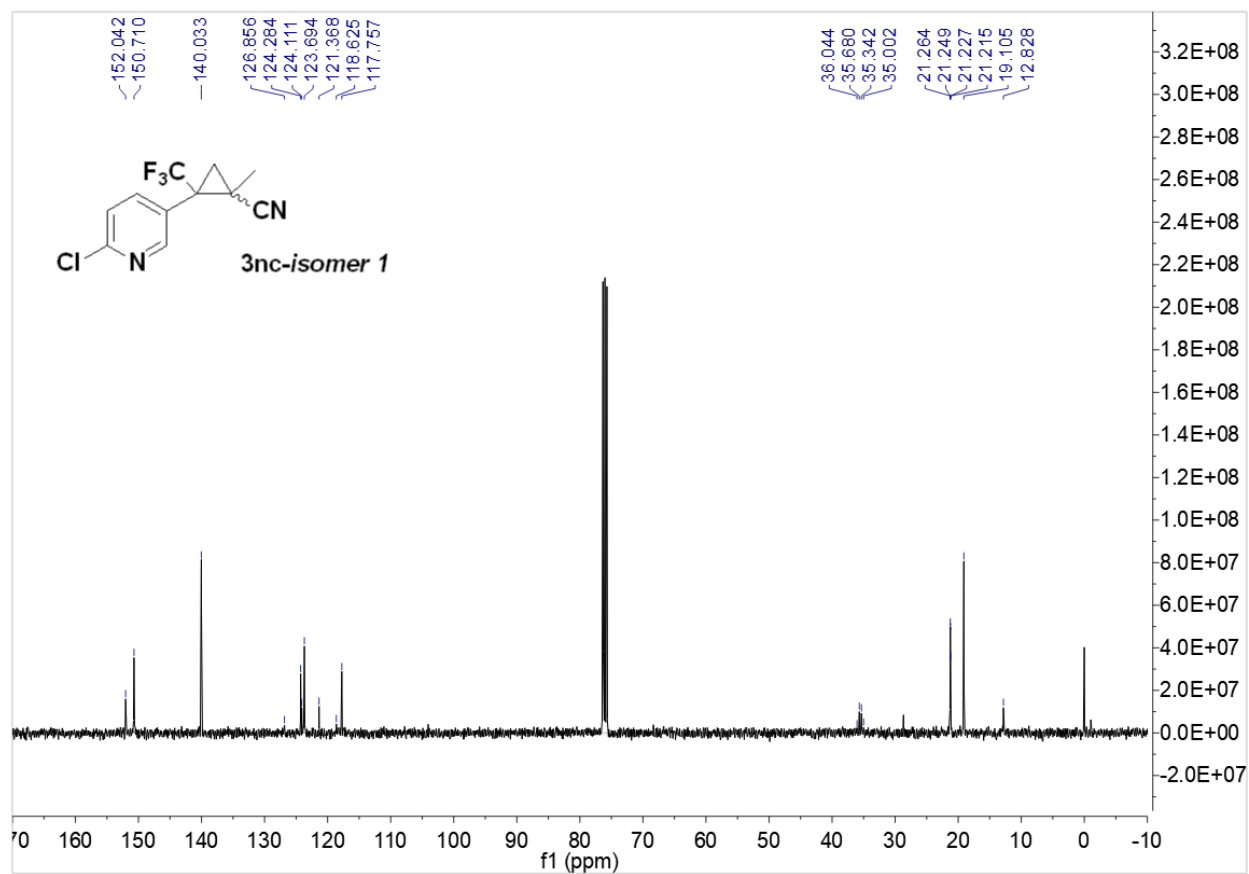

<sup>19</sup>F NMR spectrum of **3nc-isomer 1**

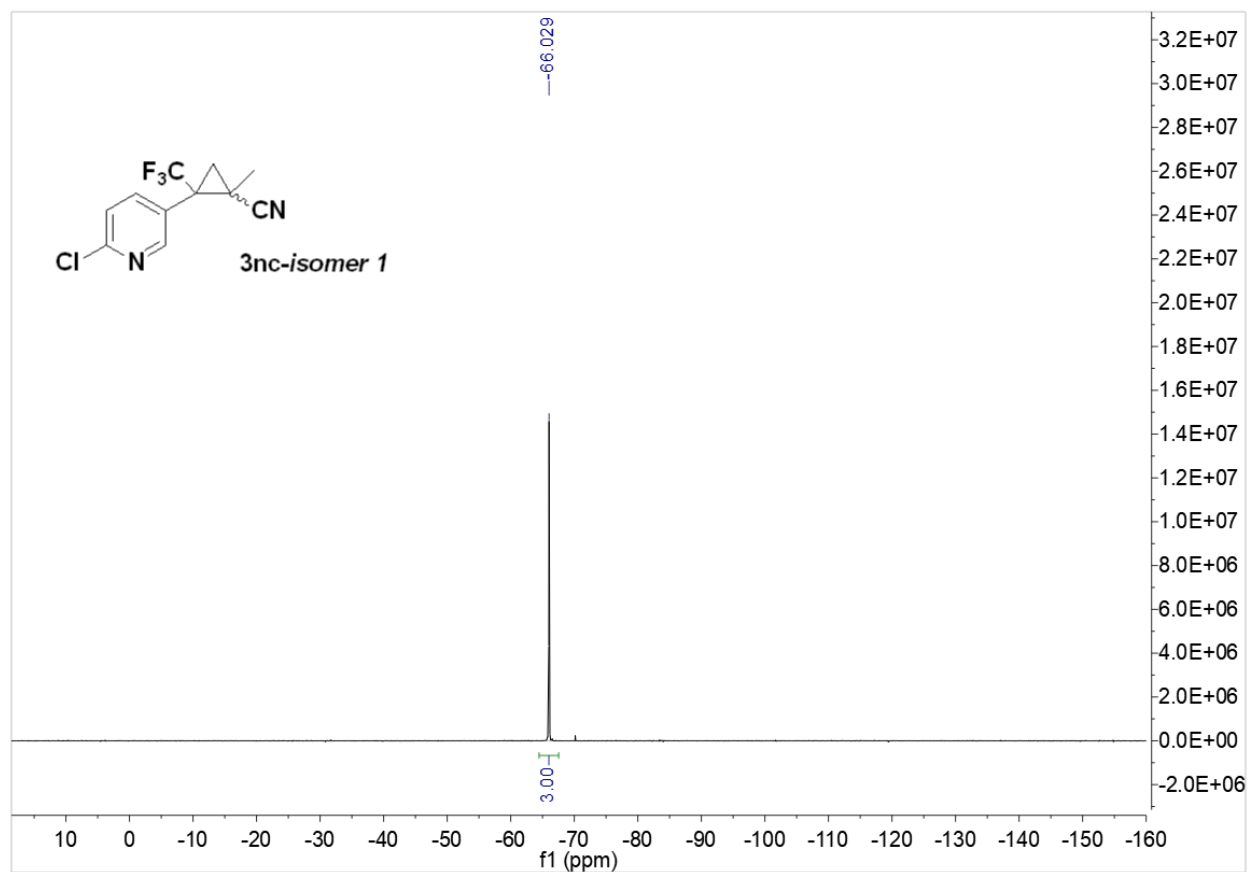



**Elemental Composition Report**

**Single Mass Analysis**

Tolerance = 20.0 PPM / DBE: min = -1.5, max = 50.0

Element prediction: Off

Number of isotope peaks used for i-FIT = 3

Monoisotopic Mass, Even Electron Ions

209 formula(e) evaluated with 1 results within limits (up to 50 closest results for each mass)

Elements Used:

C: 11-11 H: 9-9 N: 0-30 O: 0-100 Na: 0-1 Cl: 1-2 F: 3-3

3

230512-2-1 6 (0.085)

1: TOF MS ES+  
2.75e+006

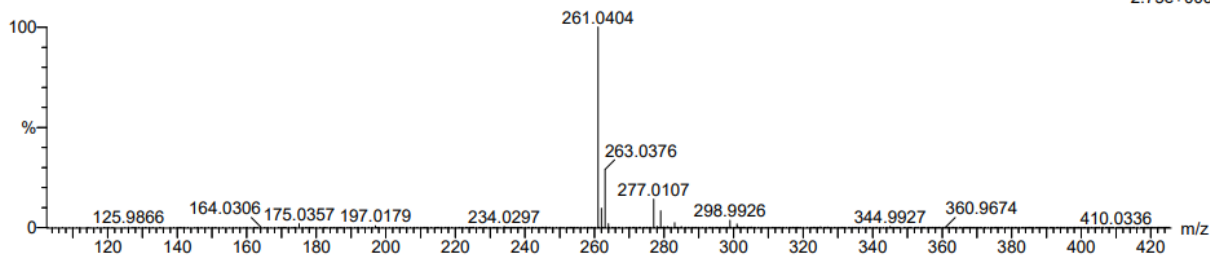

Minimum: -1.5  
Maximum: 5.0 20.0 50.0

| Mass     | Calc. Mass | mDa  | PPM  | DBE | i-FIT | Norm | Conf(%) | Formula         |
|----------|------------|------|------|-----|-------|------|---------|-----------------|
| 261.0404 | 261.0406   | -0.2 | -0.8 | 6.5 | 164.7 | n/a  | n/a     | C11 H9 N2 Cl F3 |

**<sup>1</sup>H NMR spectrum of 3ad-isomer 1**

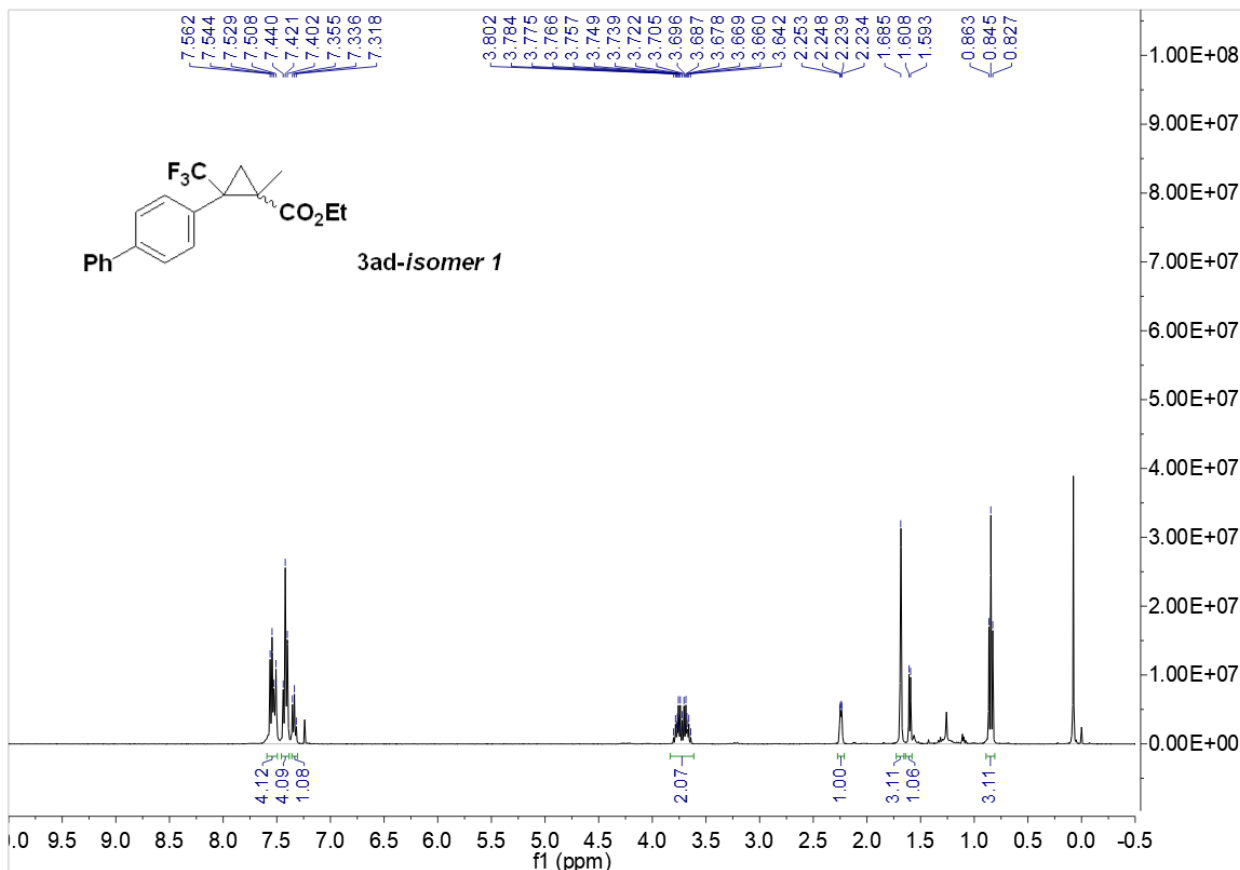

<sup>13</sup>C NMR spectrum of **3ad-isomer 1**

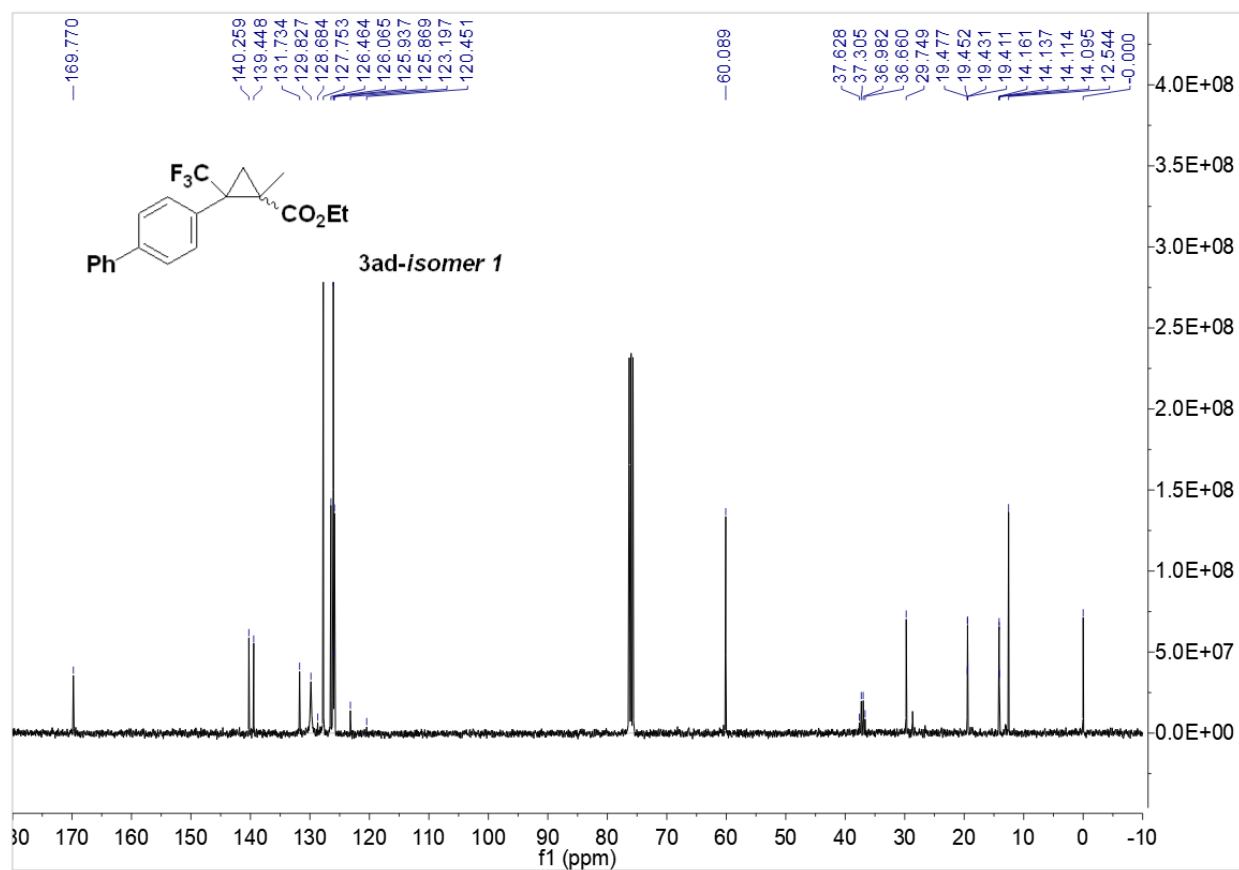

<sup>19</sup>F NMR spectrum of **3ad-isomer 1**

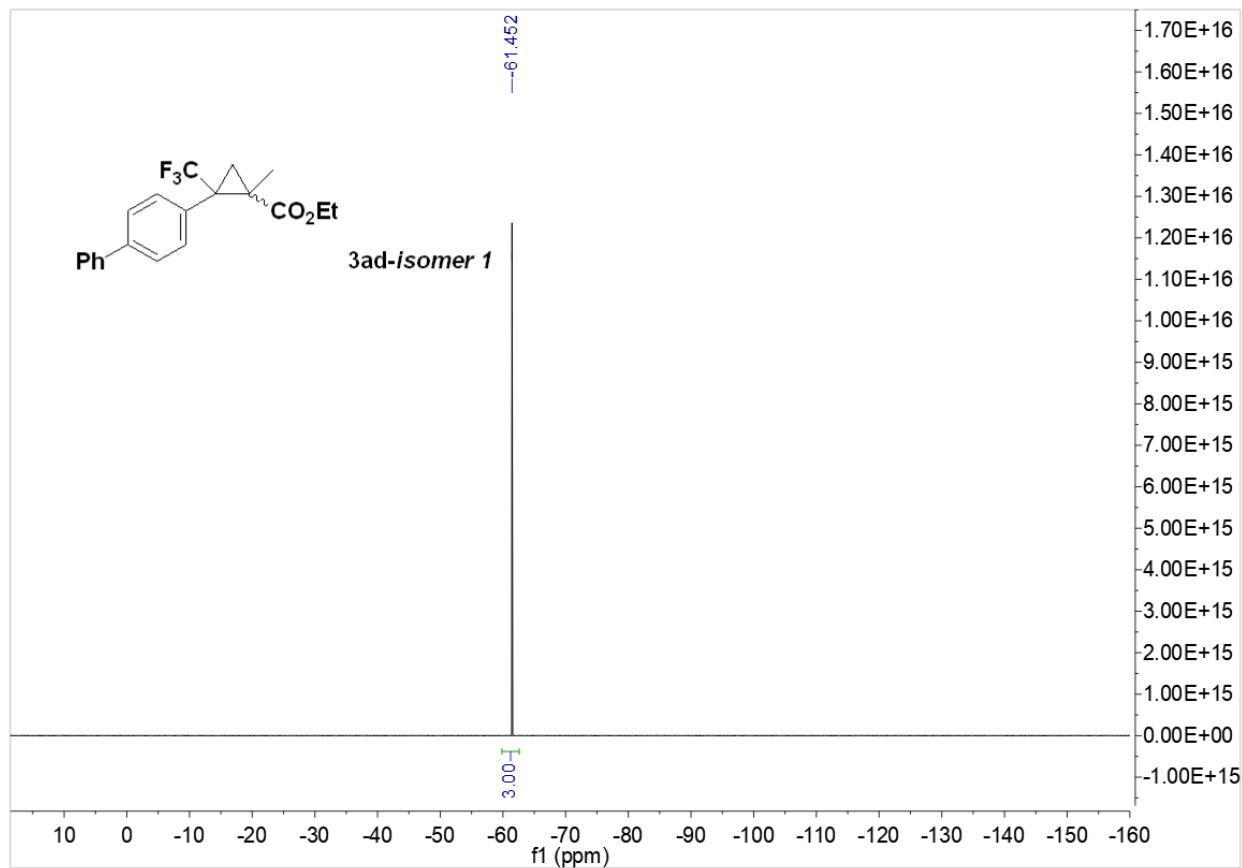

**Elemental Composition Report**

**Single Mass Analysis**

Tolerance = 20.0 PPM / DBE: min = -1.5, max = 50.0

Element prediction: Off

Number of isotope peaks used for i-FIT = 3

Monoisotopic Mass, Even Electron Ions

422 formula(e) evaluated with 1 results within limits (up to 50 closest results for each mass)

Elements Used:

C: 20-20 H: 19-19 N: 0-30 O: 0-100 F: 3-3 Na: 0-1

3

230512-2-5 5 (0.076)

1: TOF MS ES+  
3.41e+006

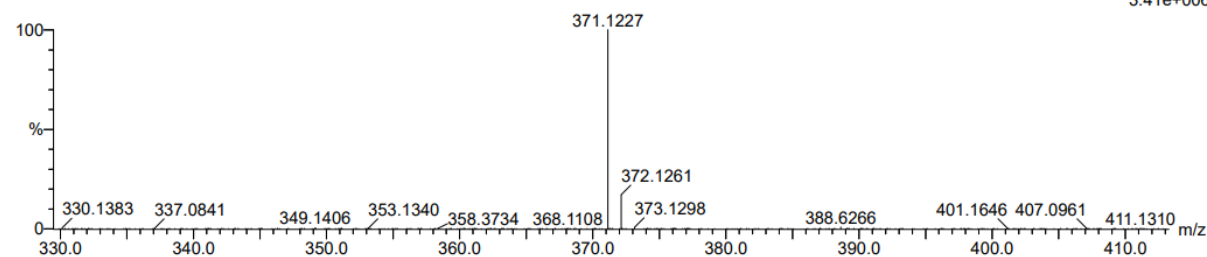

Minimum: -1.5  
Maximum: 5.0 20.0 50.0

| Mass     | Calc. Mass | mDa  | PPM  | DBE | i-FIT | Norm | Conf (%) | Formula          |
|----------|------------|------|------|-----|-------|------|----------|------------------|
| 371.1227 | 371.1235   | -0.8 | -2.2 | 9.5 | 131.8 | n/a  | n/a      | C20 H19 O2 F3 Na |

**<sup>1</sup>H NMR spectrum of 3ad-isomer 2**

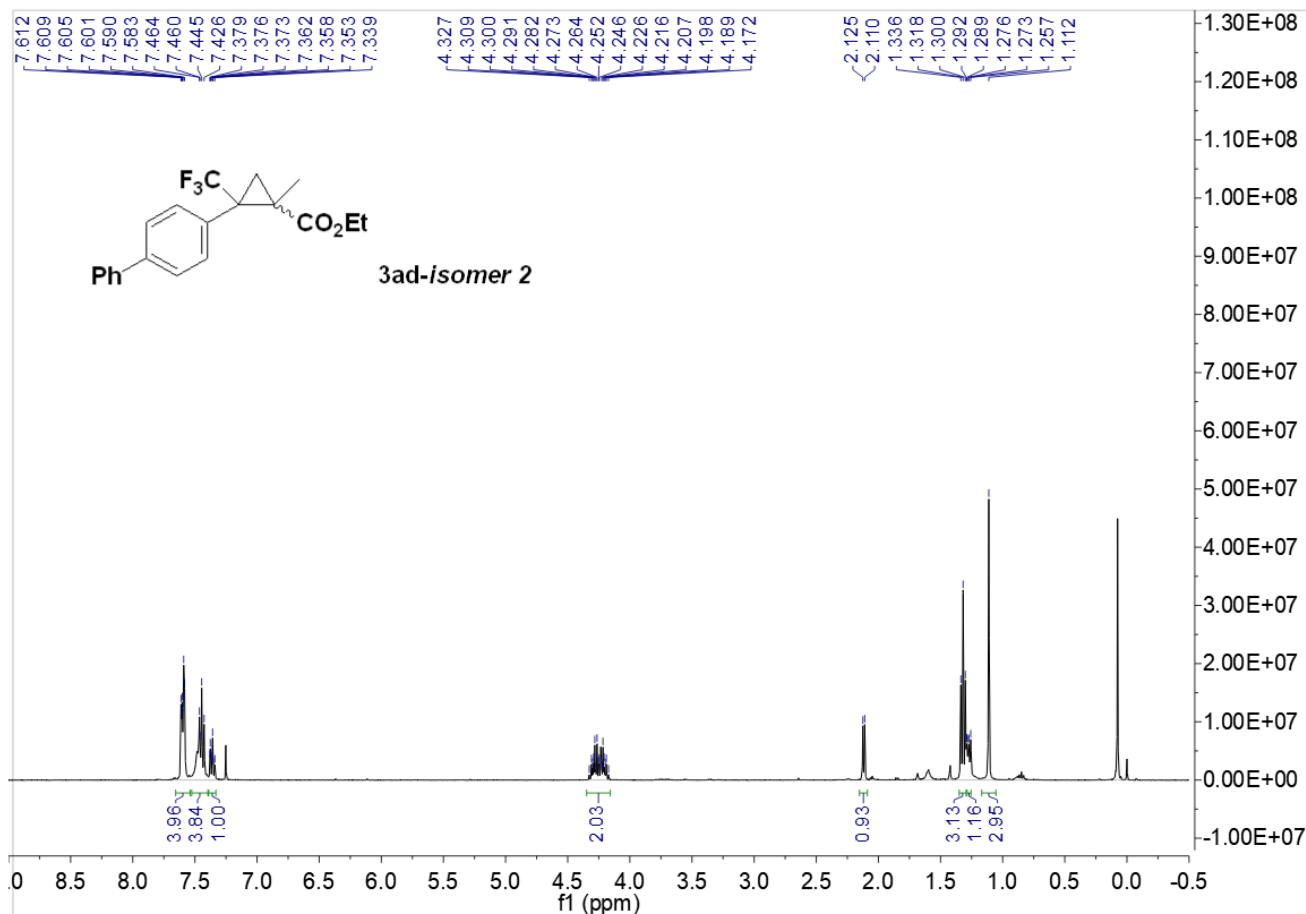

<sup>13</sup>C NMR spectrum of **3ad-isomer 2**

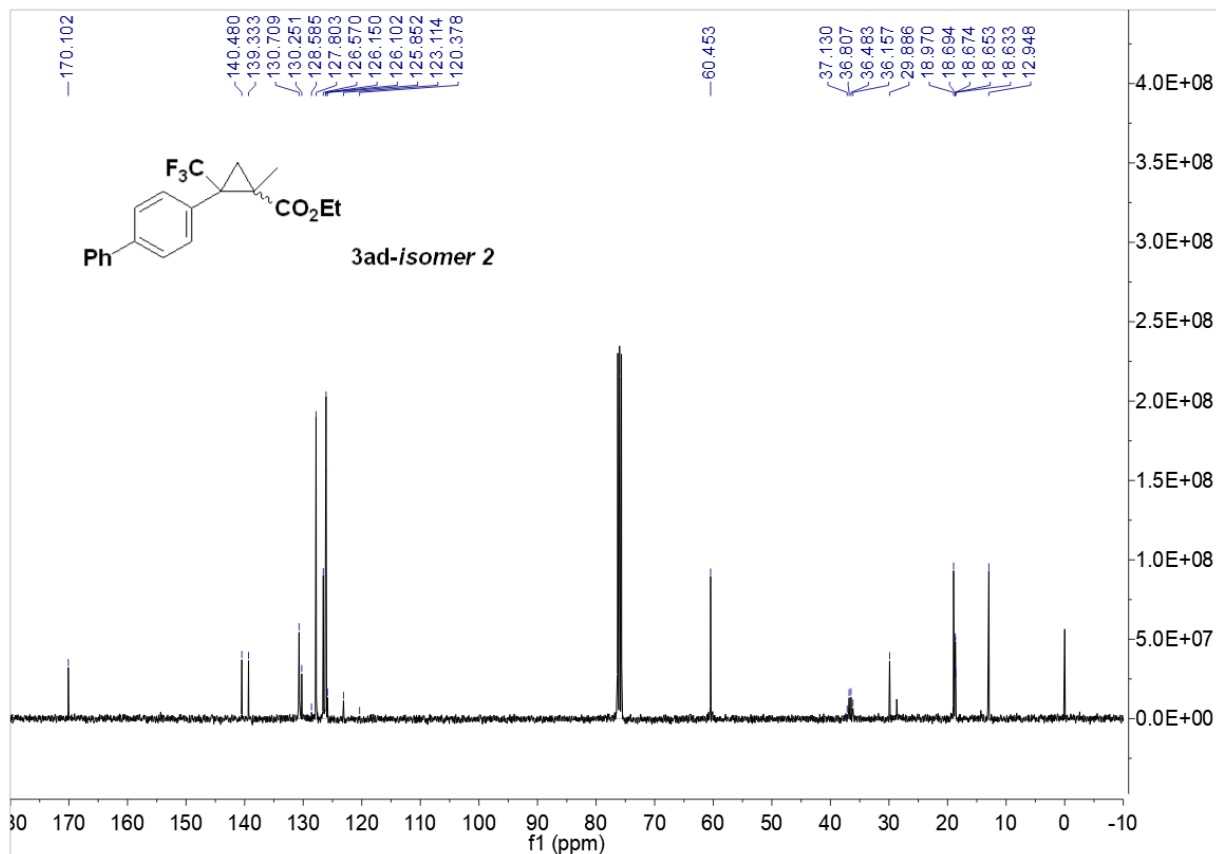

<sup>19</sup>F NMR spectrum of **3ad-isomer 2**

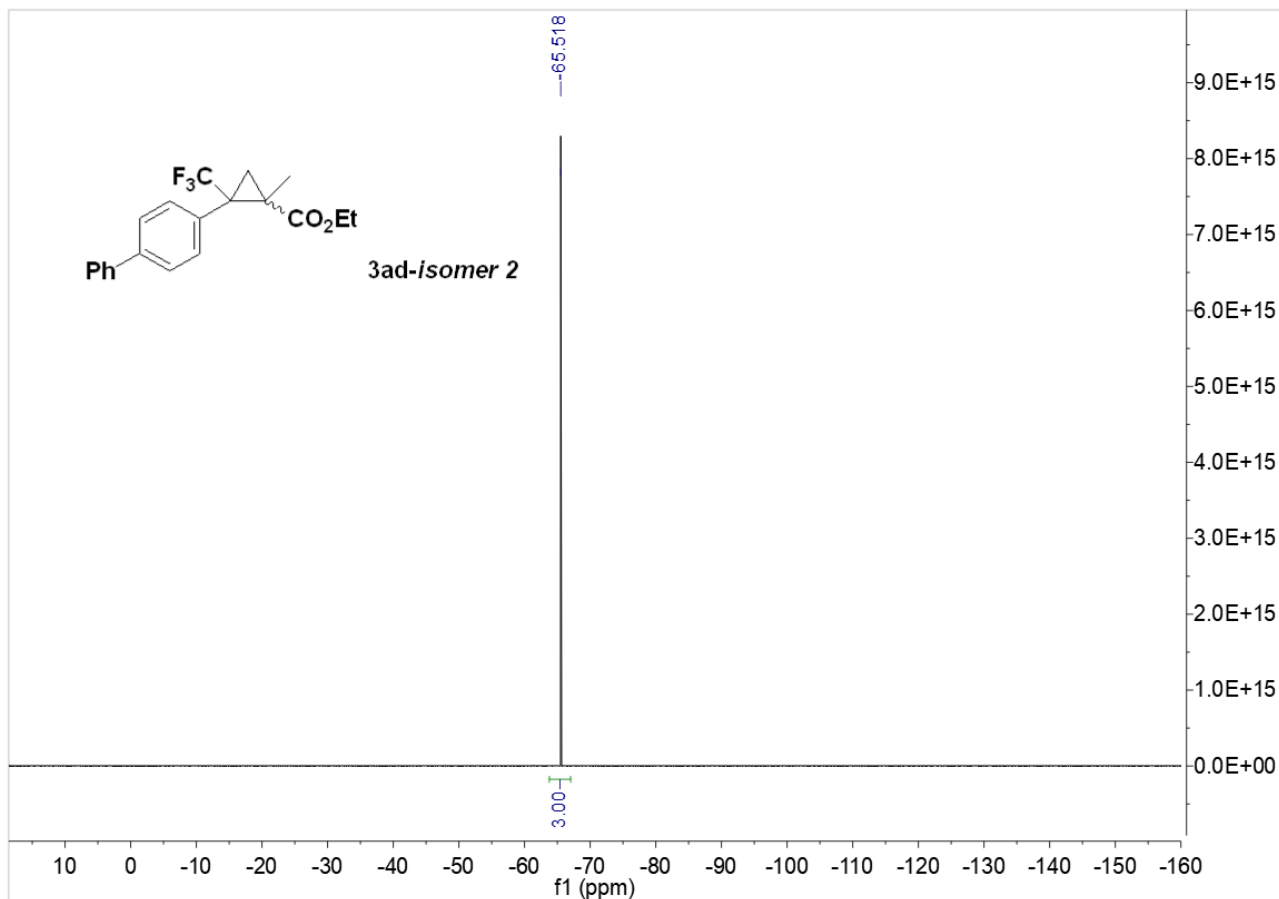

<sup>1</sup>H NMR spectrum of **3nd**

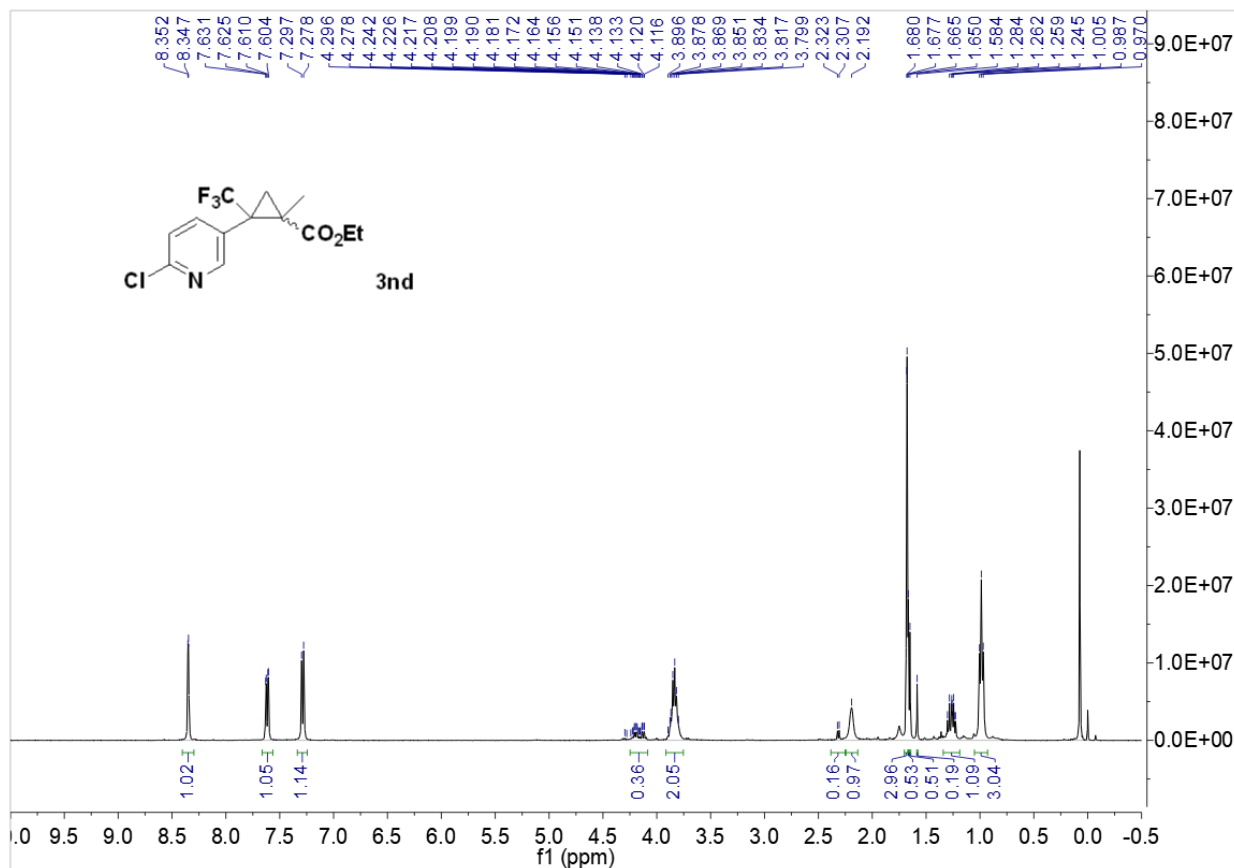

<sup>13</sup>C NMR spectrum of **3nd**

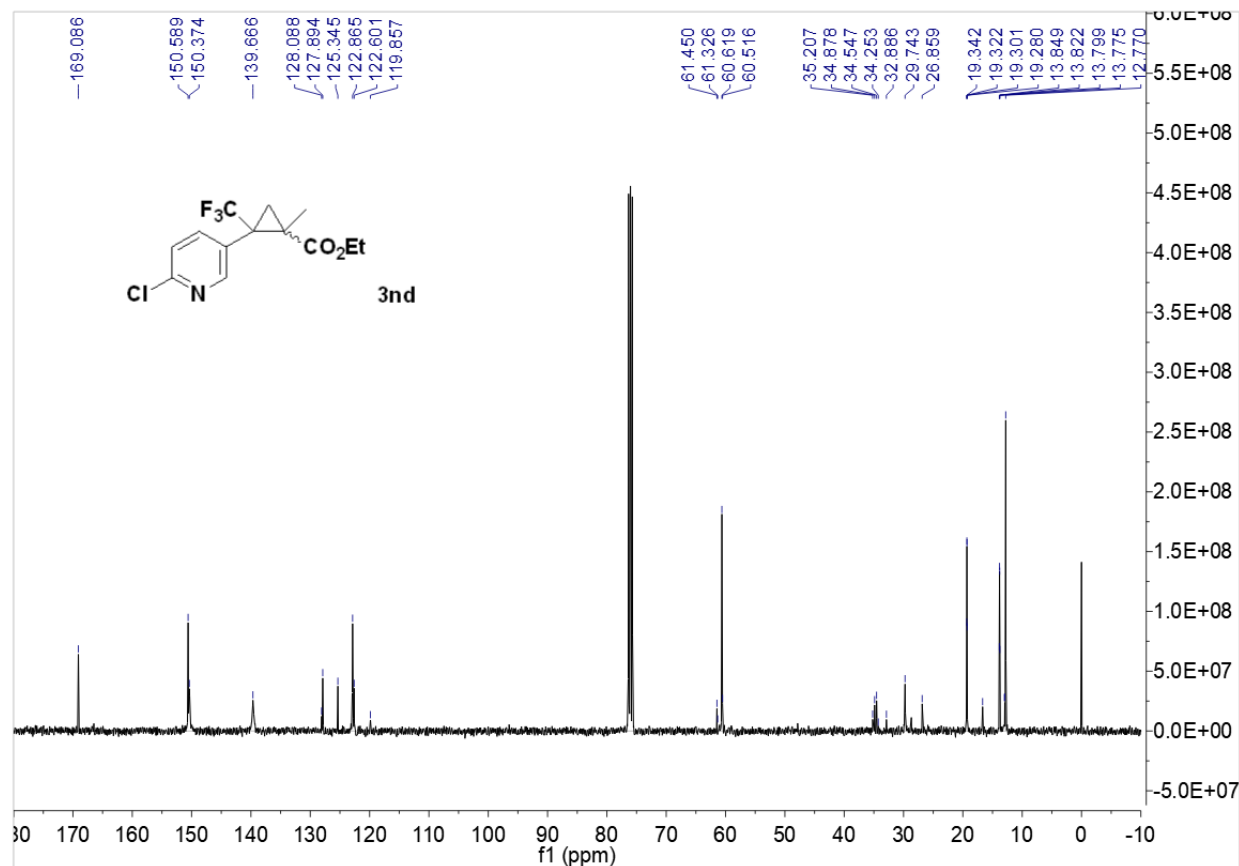

<sup>19</sup>F NMR spectrum of **3nd**

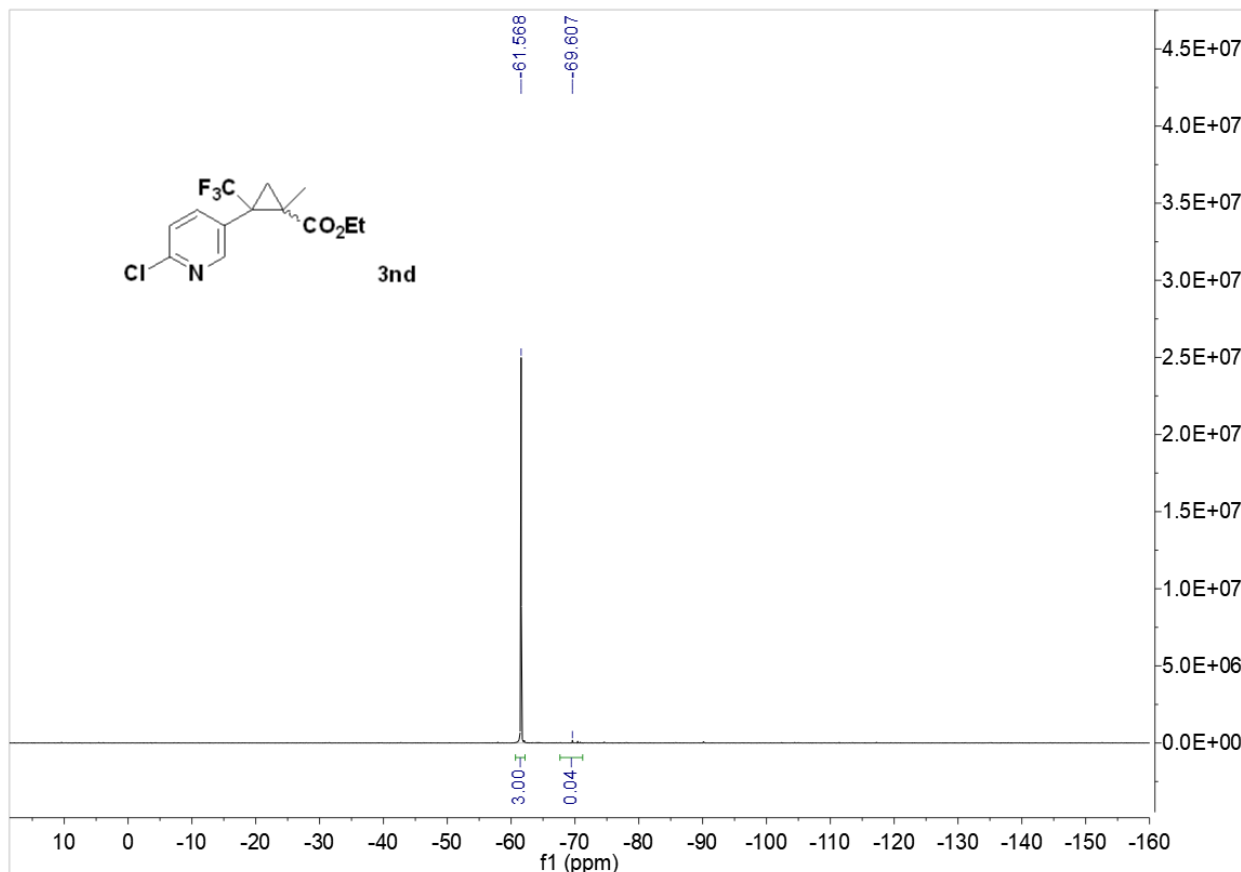

HRMS (ESI) spectrum of **3nd**

Elemental Composition Report

Single Mass Analysis

Tolerance = 20.0 PPM / DBE: min = -1.5, max = 50.0

Element prediction: Off

Number of isotope peaks used for i-FIT = 3

Monoisotopic Mass, Even Electron Ions

344 formula(e) evaluated with 1 results within limits (up to 50 closest results for each mass)

Elements Used:

C: 13-13 H: 14-14 N: 0-30 O: 0-100 F: 3-3 Na: 0-1 Cl: 1-2

3

230512-2-4 13 (0.161)

1: TOF MS ES+  
5.53e+005

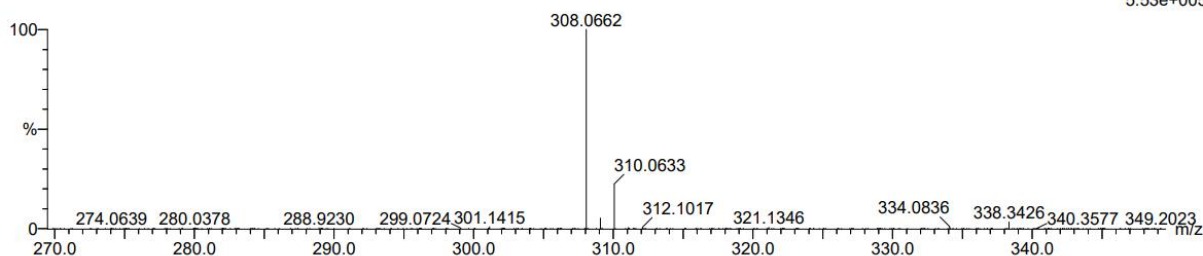

Minimum: -1.5  
Maximum: 5.0 20.0 50.0

| Mass     | Calc. Mass | mDa  | PPM  | DBE | i-FIT | Norm | Conf (%) | Formula            |
|----------|------------|------|------|-----|-------|------|----------|--------------------|
| 308.0662 | 308.0665   | -0.3 | -1.0 | 5.5 | 75.0  | n/a  | n/a      | C13 H14 N 02 F3 Cl |

<sup>1</sup>H NMR spectrum of *trans*-3ae

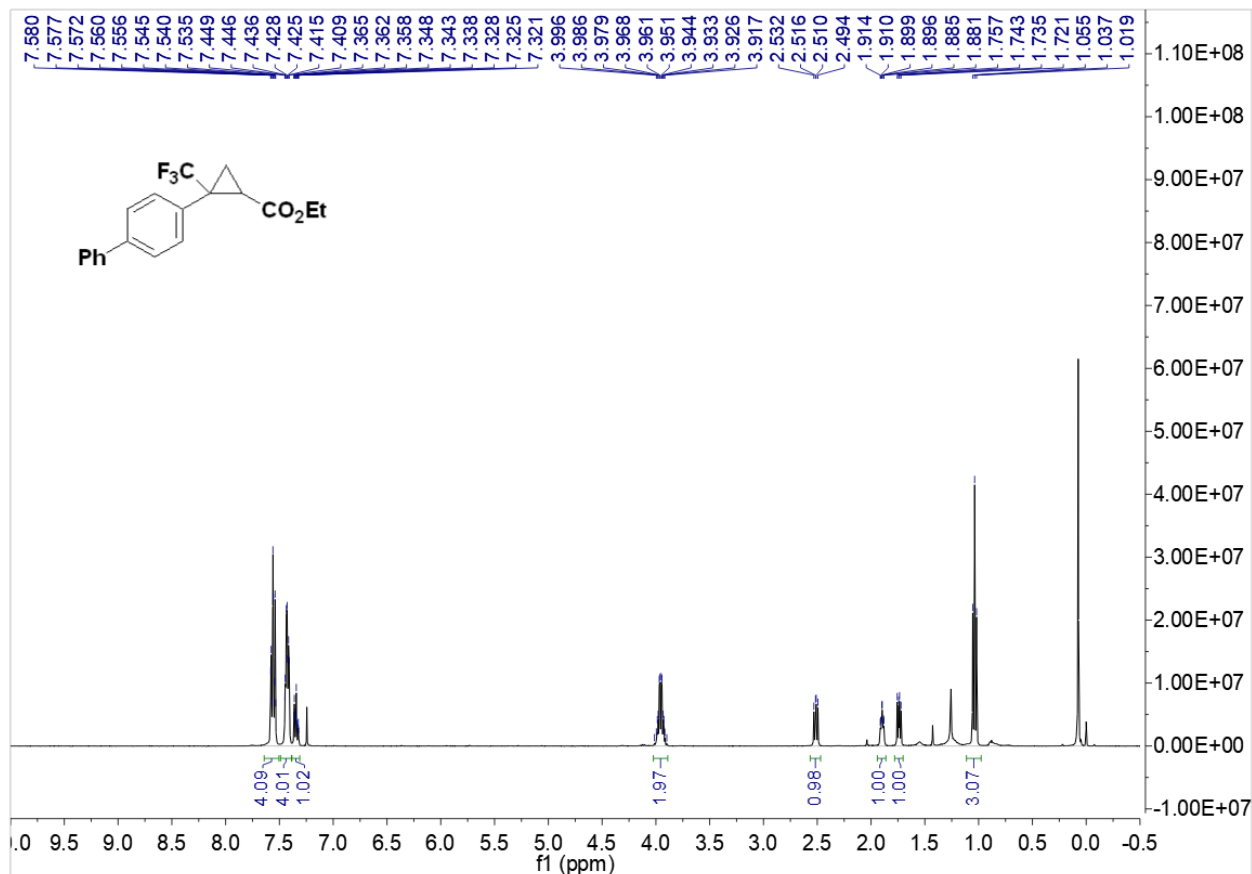

<sup>13</sup>C NMR spectrum of *trans*-3ae

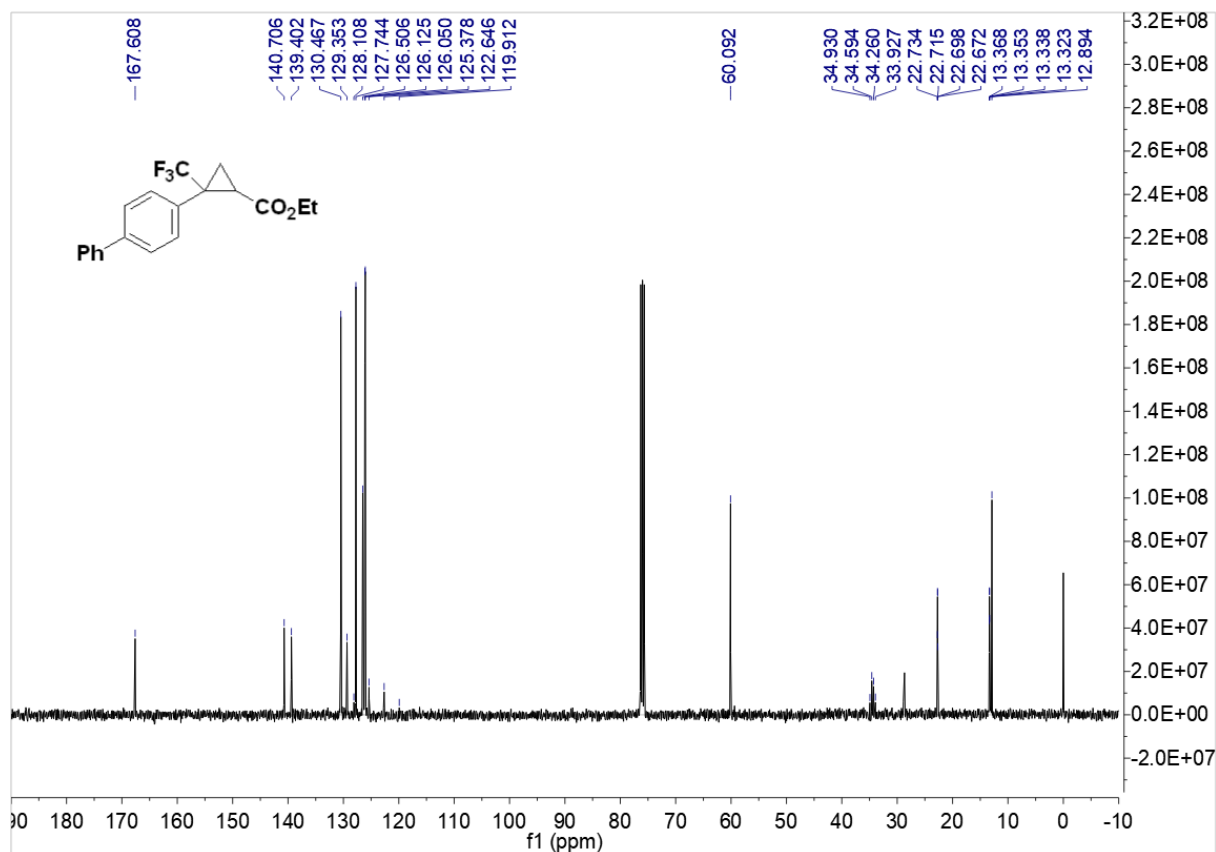

$^{19}\text{F}$  NMR spectrum of *trans*-3ae

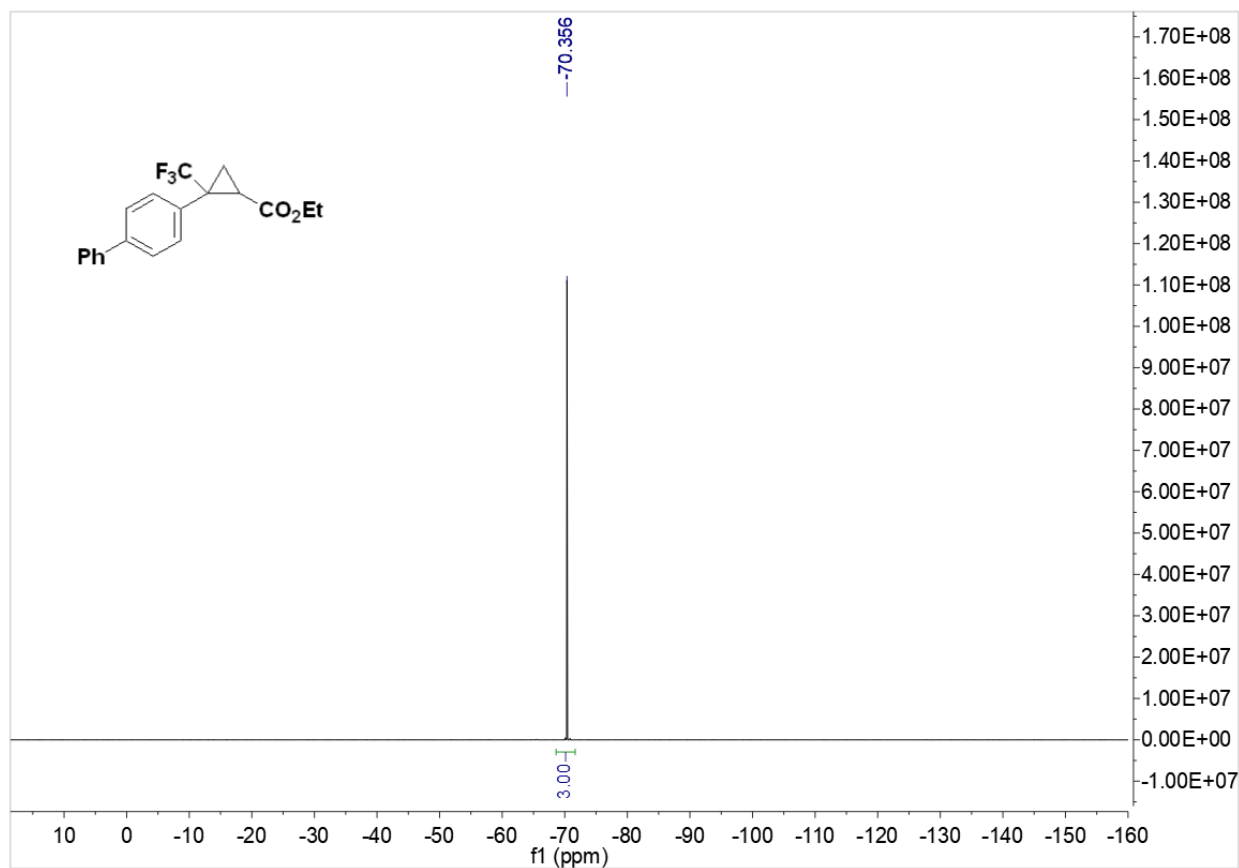

HRMS (EI) spectrum of *trans*-3ae

CS-DYP-334

Waters GCT Premier

20222058 237 (3.950) Cm (237-(23+66))

TOF MS EI+  
1.81e4

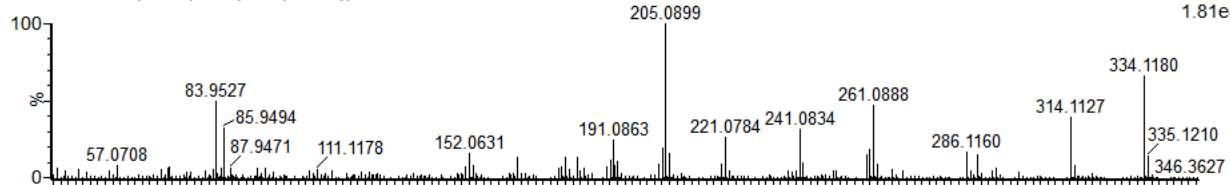



$^1\text{H}$  NMR spectrum of *trans*-3be

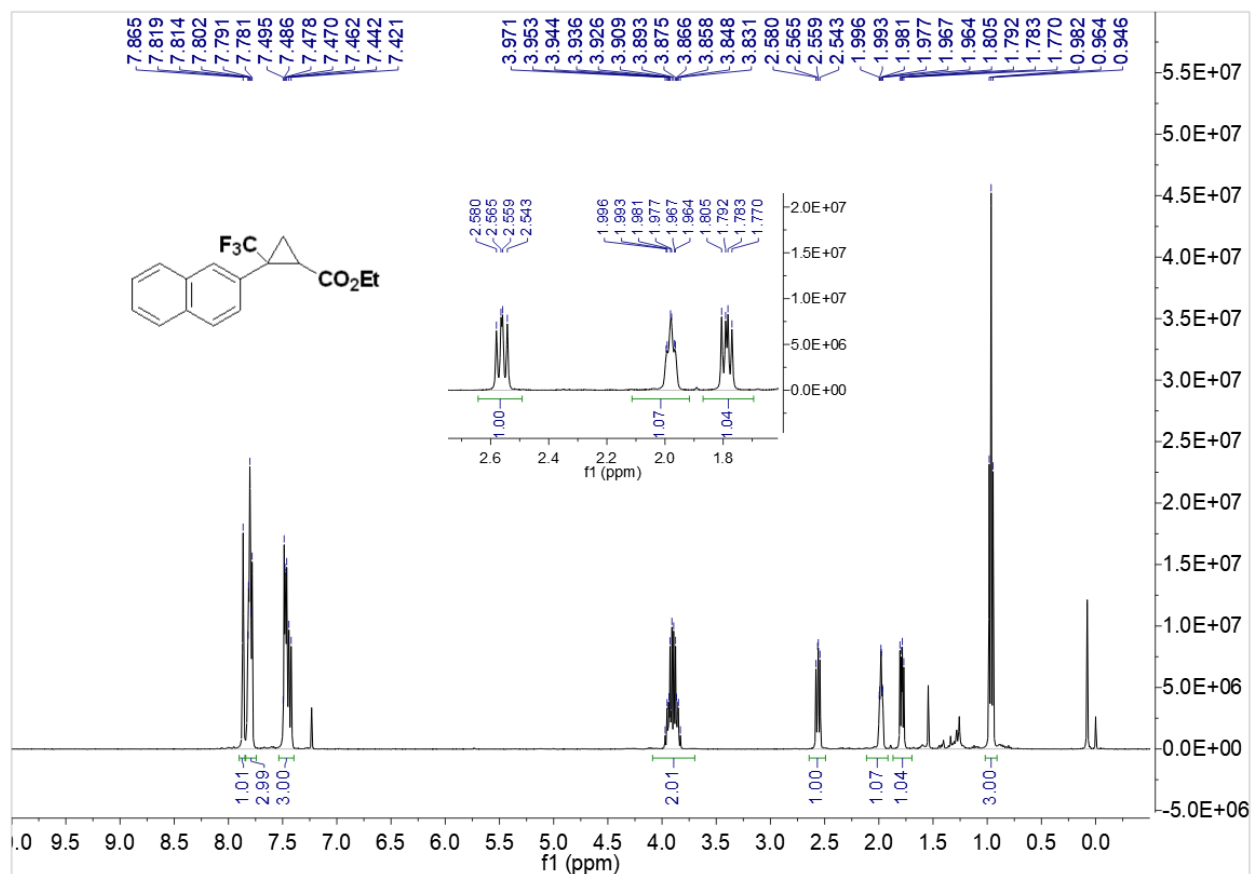

$^{13}\text{C}$  NMR spectrum of *trans*-3be

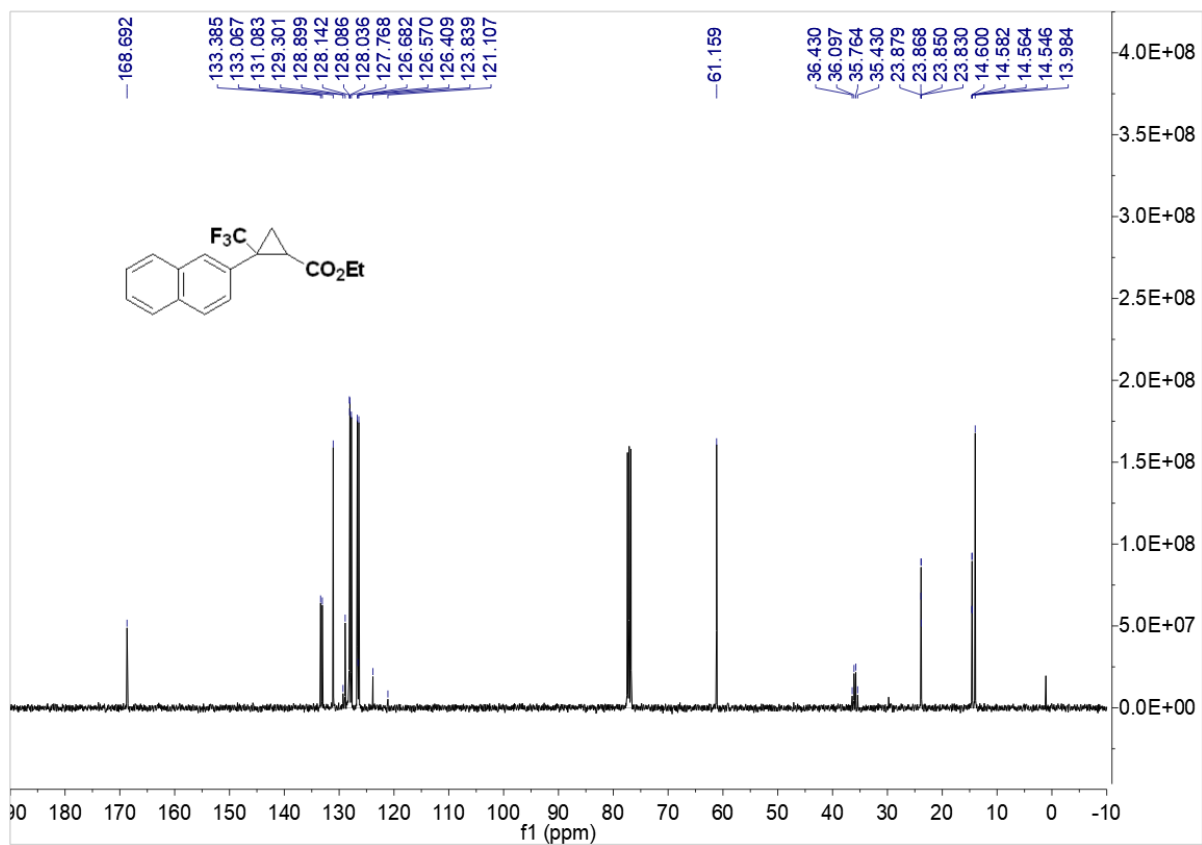

<sup>19</sup>F NMR spectrum of *trans*-3be

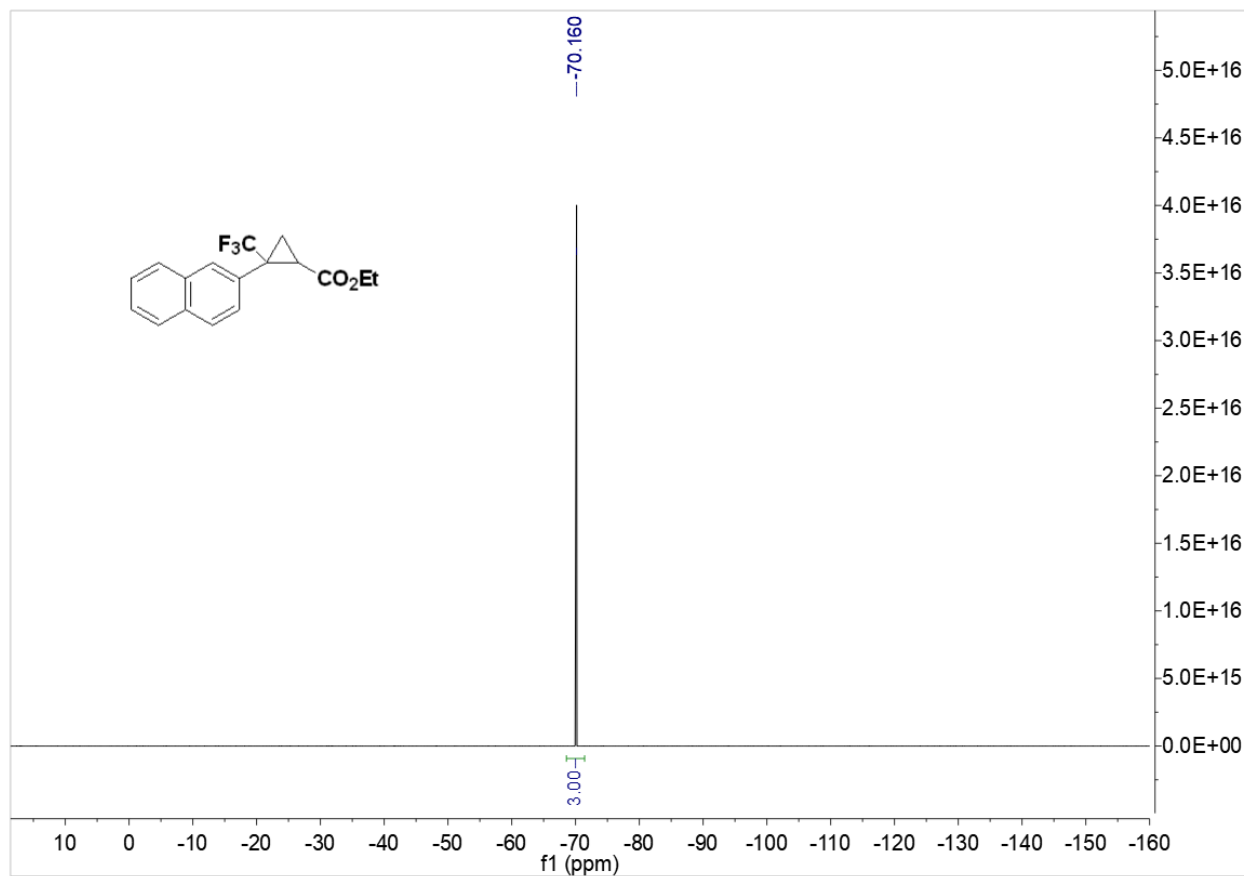

HRMS (EI) spectrum of *trans*-3be

CS-DYP-308

20222057-1 110 (1.833) Cm (110-(6+245))

Waters GCT Premier

TOF MS EI+  
1.49e4

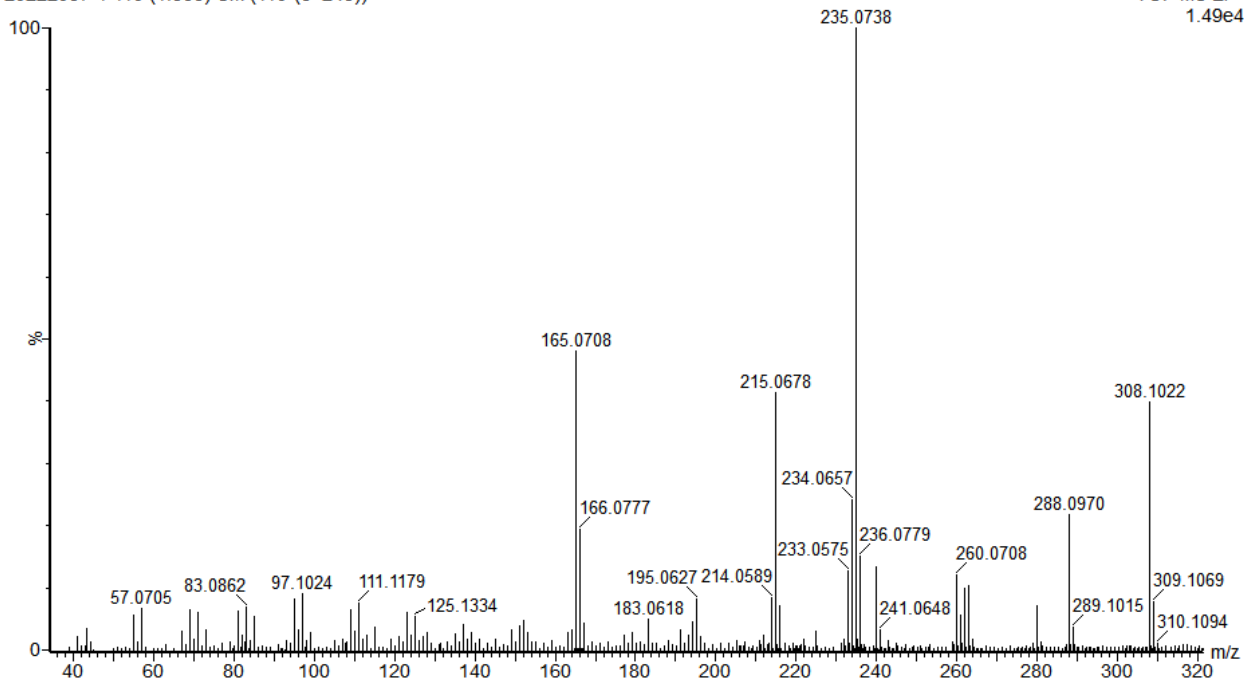

<sup>1</sup>H NMR spectrum of **3af**

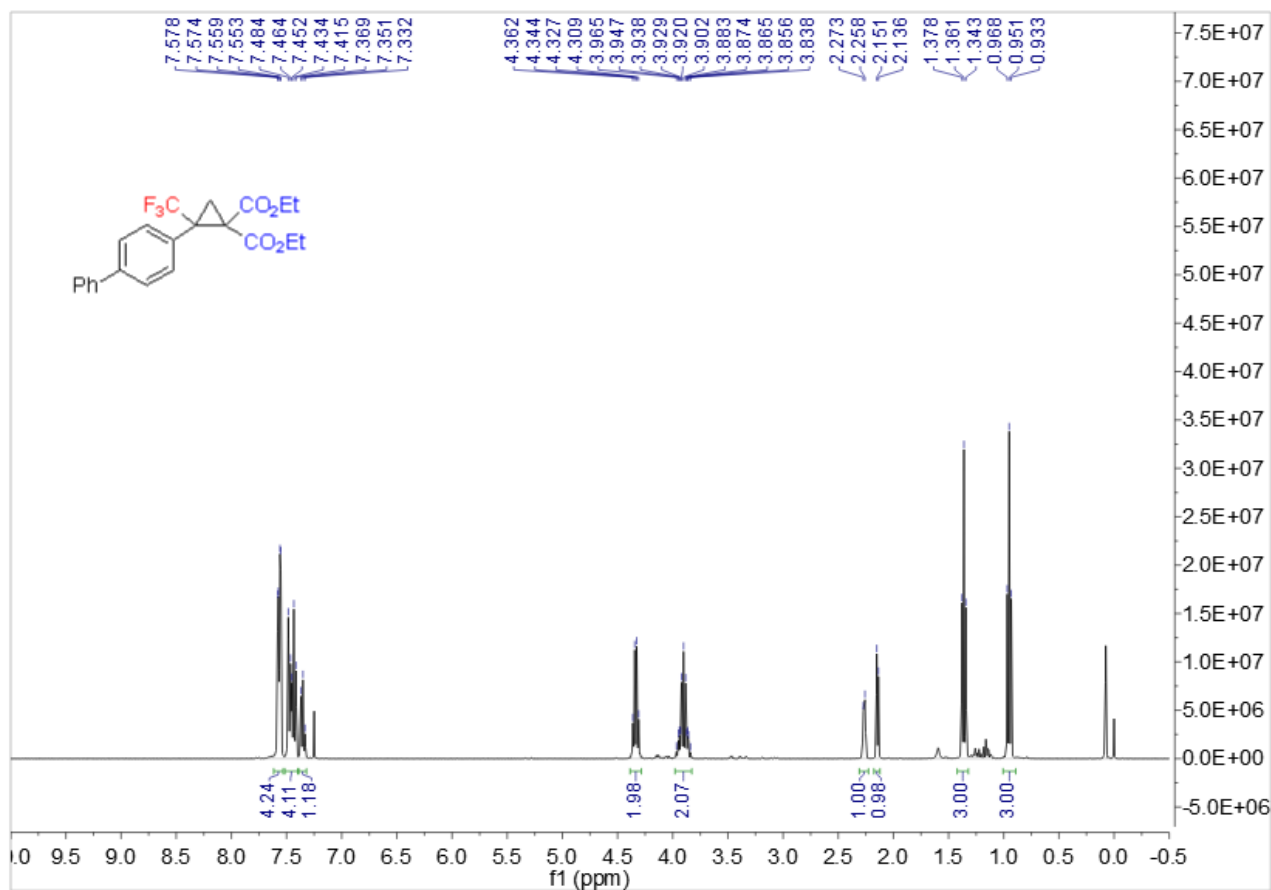

<sup>13</sup>C NMR spectrum of **3af**

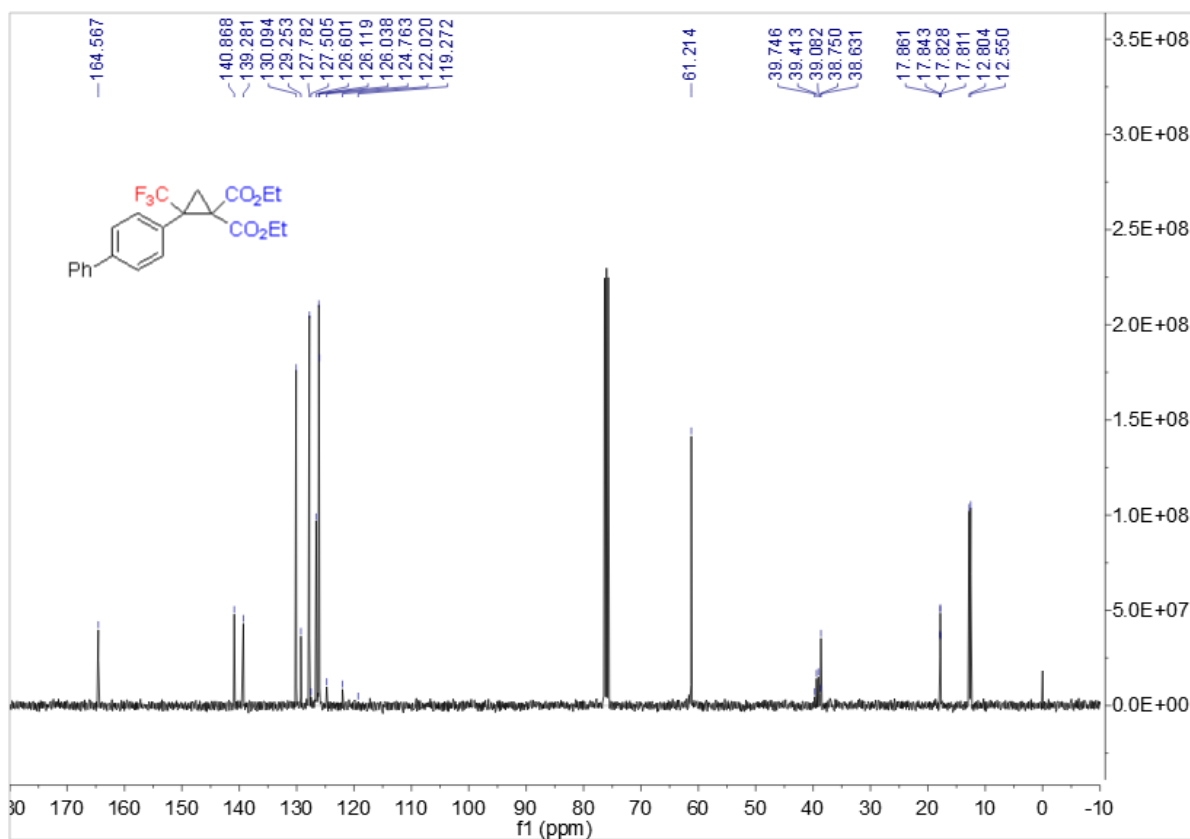

<sup>19</sup>F NMR spectrum of **3af**

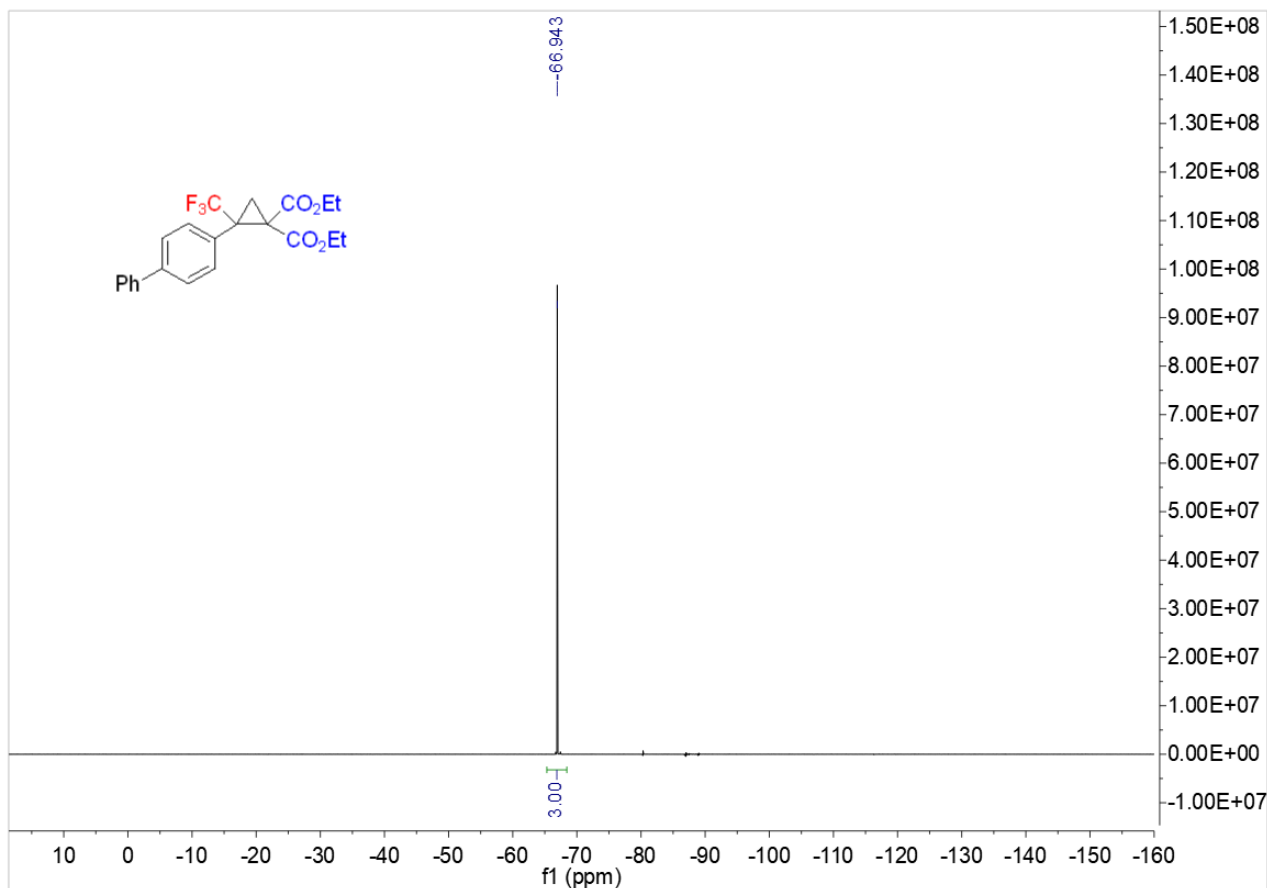

HRMS (ESI) spectrum of **3af**

Elemental Composition Report

Page 1

Single Mass Analysis

Tolerance = 20.0 PPM / DBE: min = -1.5, max = 50.0  
 Element prediction: Off  
 Number of isotope peaks used for i-FIT = 3

Monoisotopic Mass, Even Electron Ions

576 formula(e) evaluated with 1 results within limits (up to 50 closest results for each mass)

Elements Used:

C: 22-22 H: 21-21 N: 0-30 O: 0-100 F: 3-3 Na: 0-1

3

230512-2-6 13 (0.161)

1: TOF MS ES+  
2.79e+006

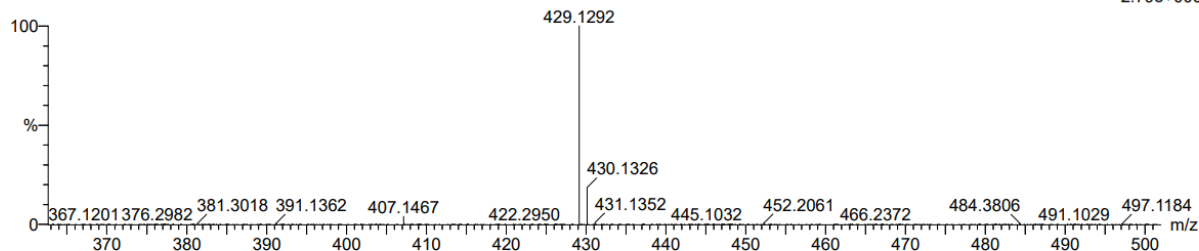

Minimum: -1.5  
 Maximum: 50.0

| Mass     | Calc. Mass | mDa | PPM | DBE  | i-FIT | Norm | Conf (%) | Formula          |
|----------|------------|-----|-----|------|-------|------|----------|------------------|
| 429.1292 | 429.1290   | 0.2 | 0.5 | 10.5 | 100.6 | n/a  | n/a      | C22 H21 O4 F3 Na |

<sup>1</sup>H NMR spectrum of **3af'**

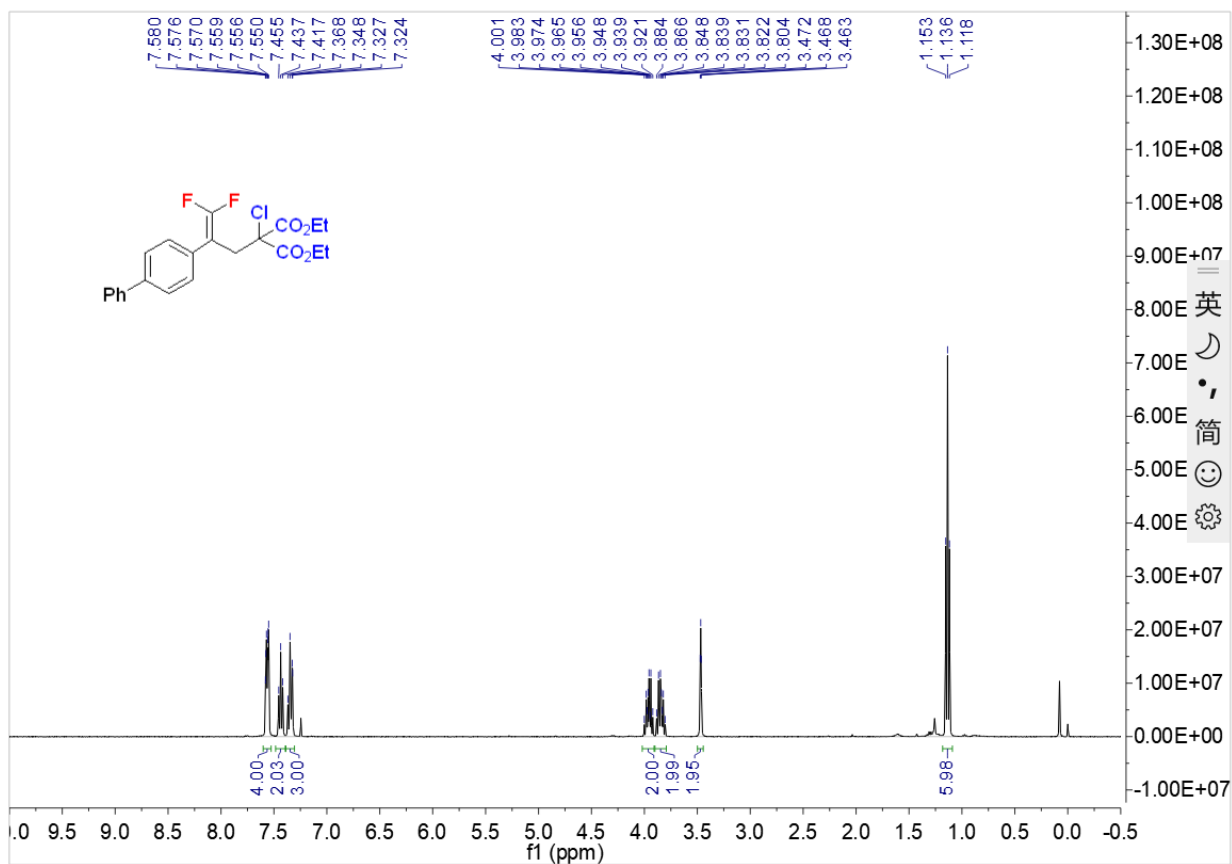

<sup>13</sup>C NMR spectrum of **3af'**

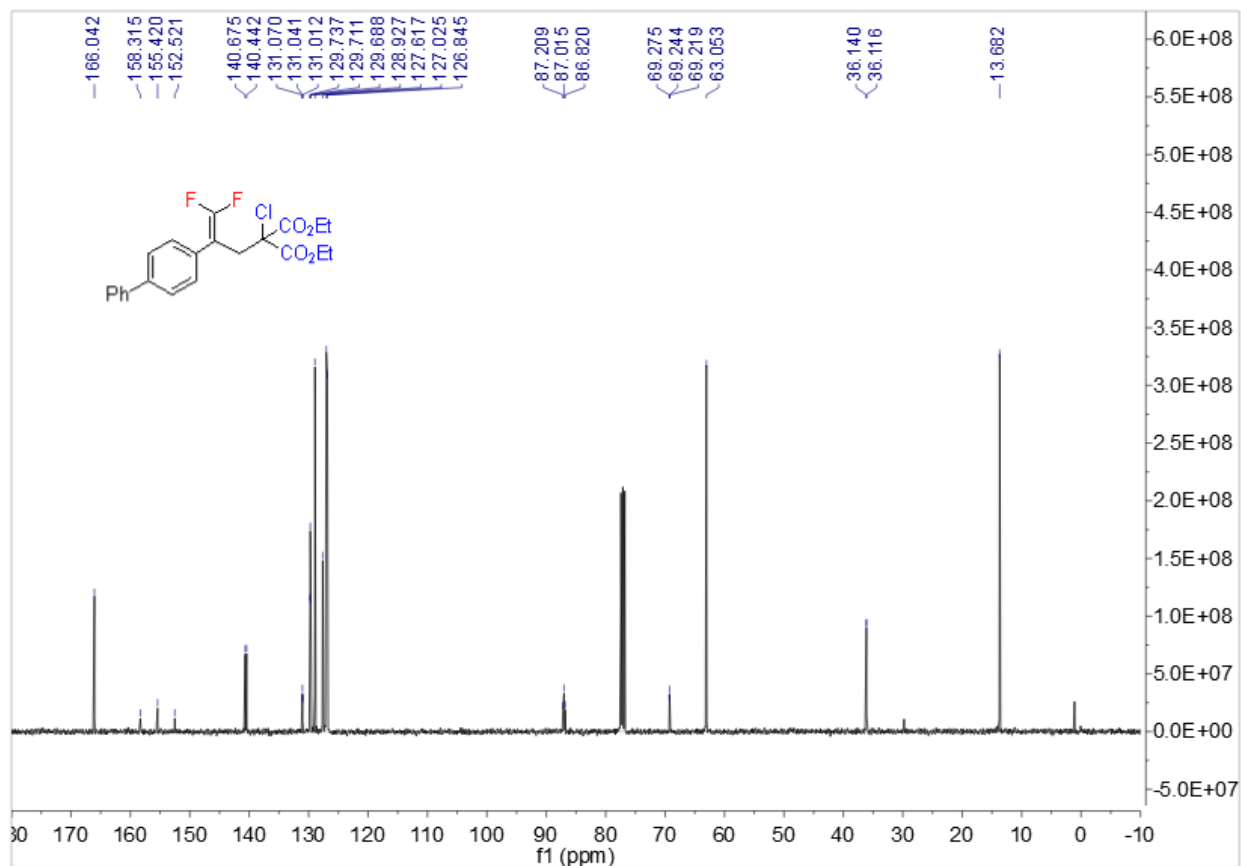

<sup>19</sup>F NMR spectrum of **3af'**

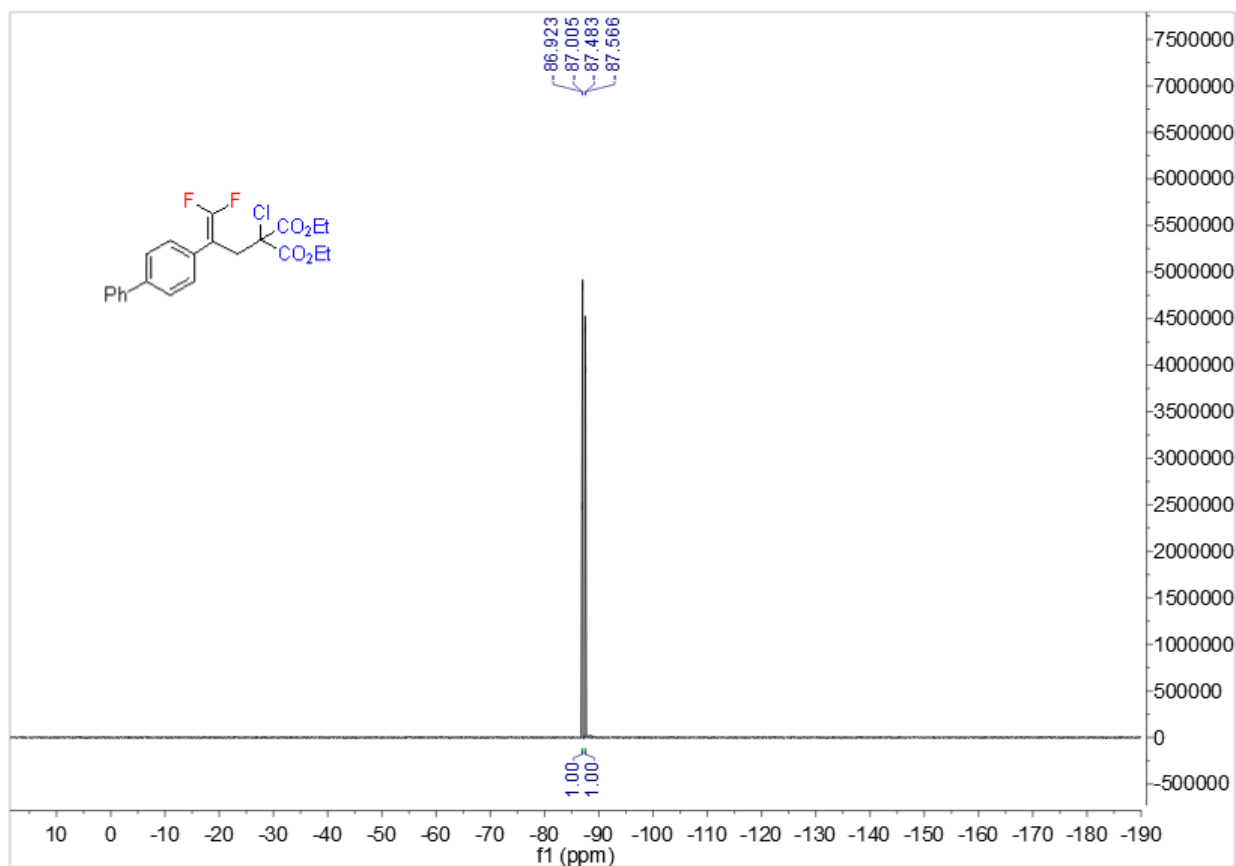

HRMS (ESI) spectrum of **3af'**

Elemental Composition Report

Page 1

Single Mass Analysis

Tolerance = 20.0 PPM / DBE: min = -1.5, max = 50.0

Element prediction: Off

Number of isotope peaks used for i-FIT = 3

Monoisotopic Mass, Even Electron Ions

2039 formula(e) evaluated with 1 results within limits (up to 50 closest results for each mass)

Elements Used:

C: 22-22 H: 21-21 N: 0-30 O: 0-100 F: 2-3 Na: 0-1 Cl: 1-2

3

230512-2-7 17 (0.203)

1: TOF MS ES+  
2.44e+006

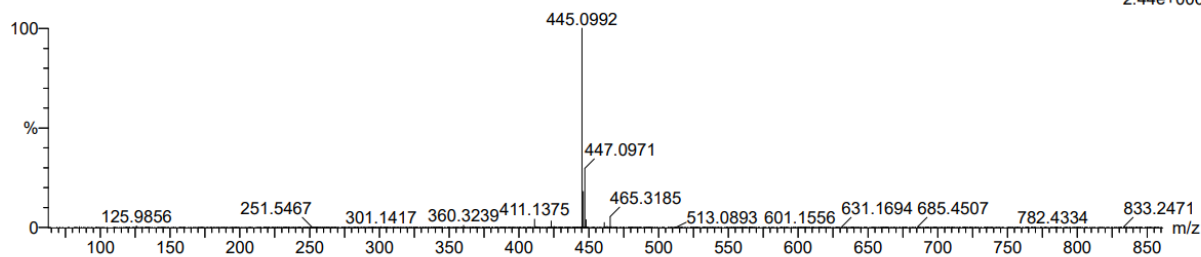

Minimum: -1.5  
Maximum: 5.0 20.0 50.0

| Mass     | Calc. Mass | mDa  | PPM  | DBE  | i-FIT | Norm | Conf (%) | Formula             |
|----------|------------|------|------|------|-------|------|----------|---------------------|
| 445.0992 | 445.0994   | -0.2 | -0.4 | 10.5 | 167.2 | n/a  | n/a      | C22 H21 O4 F2 Na Cl |

$^1\text{H}$  NMR spectrum of *trans*-3qa

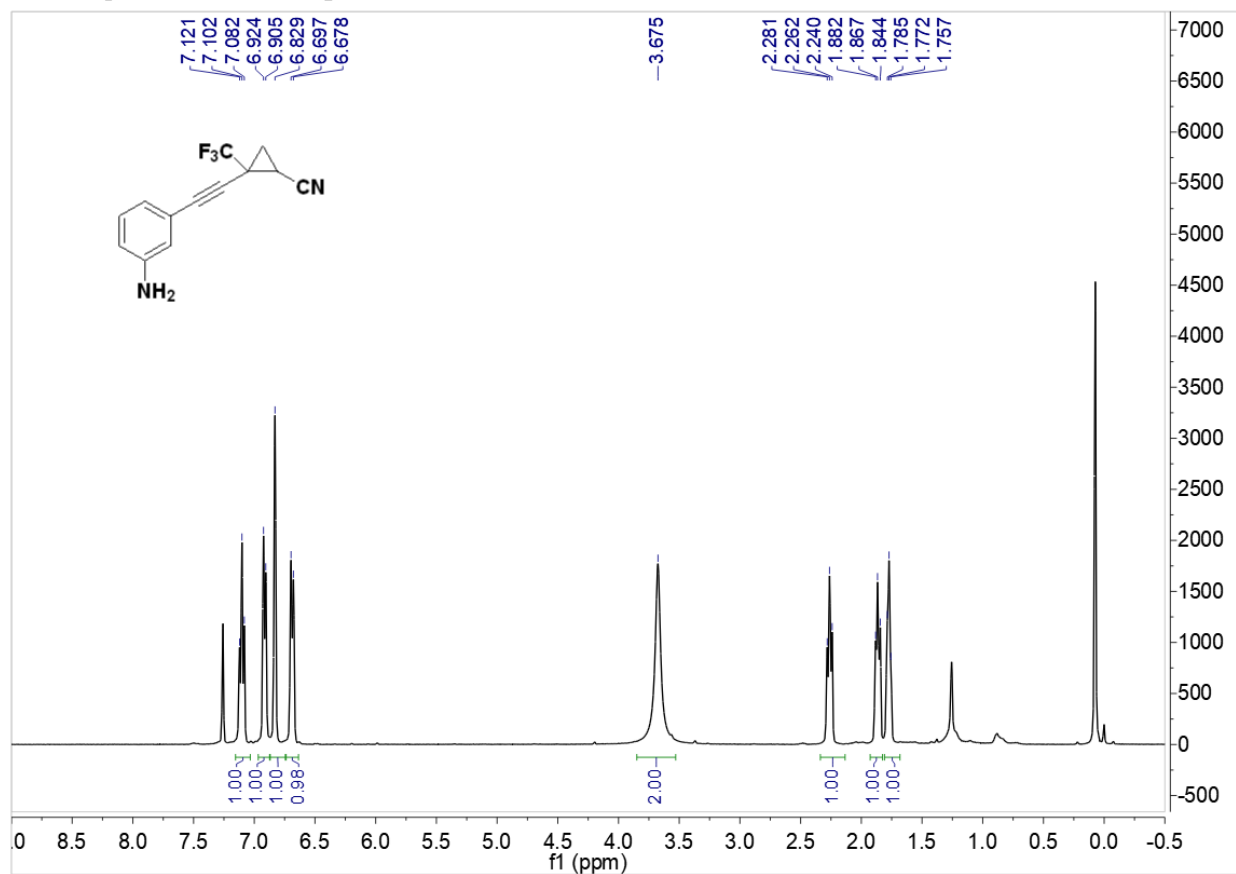

$^{13}\text{C}$  NMR spectrum of *trans*-3qa

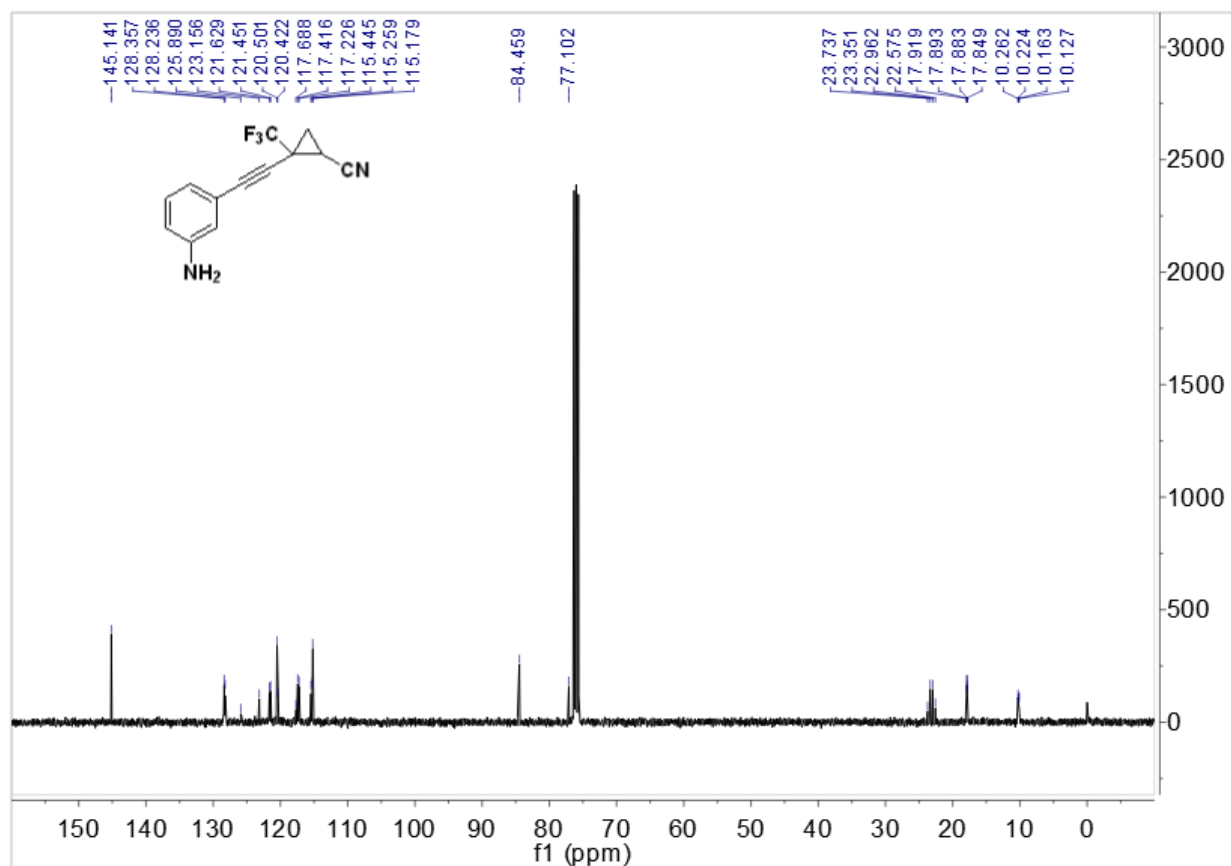

$^{19}\text{F}$  NMR spectrum of *trans*-3qa

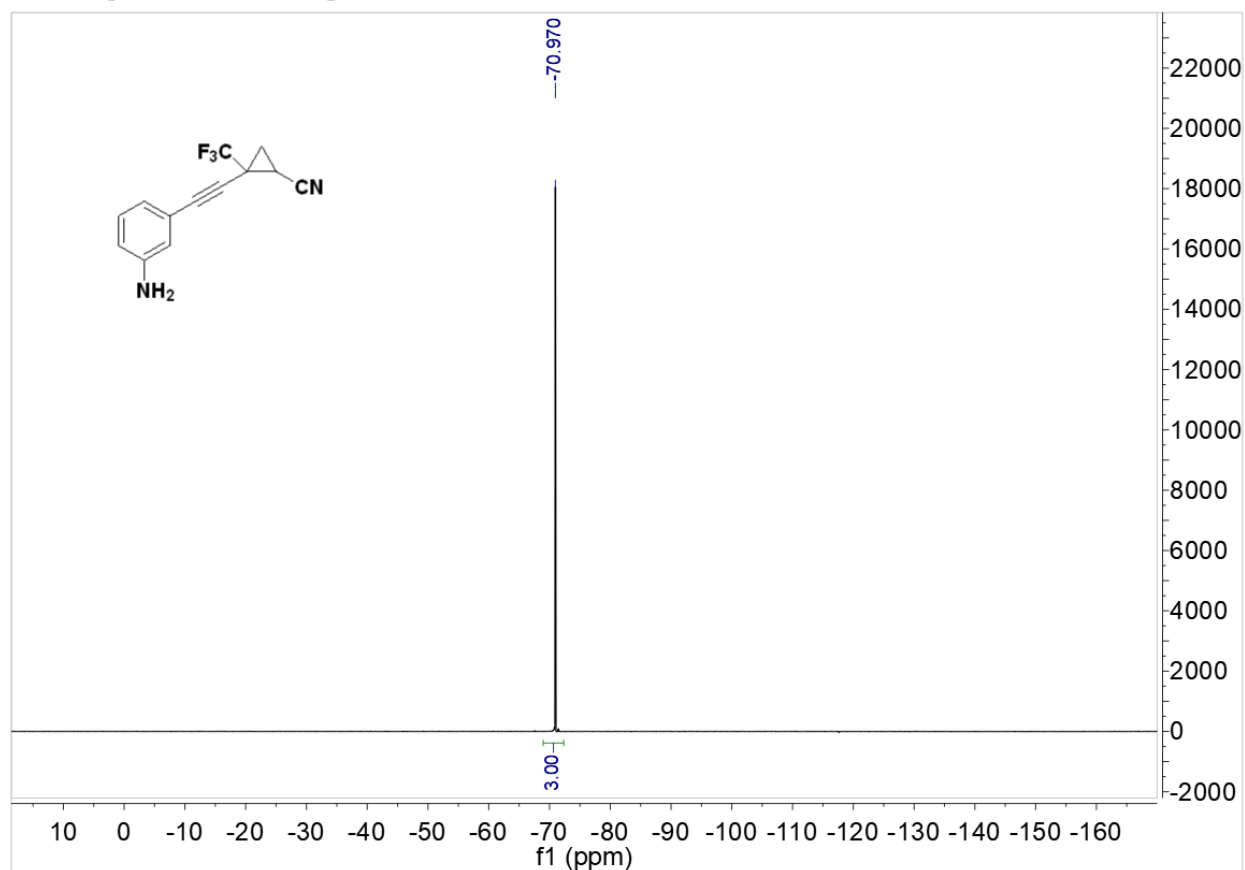

HRMS (EI) spectrum of *trans*-3qa

CS-HJJ-250

Waters GCTPremier

20221720 94 (1.567) Cm (94-(29+34))

TOF MS EI+  
250.0721 1.47e4

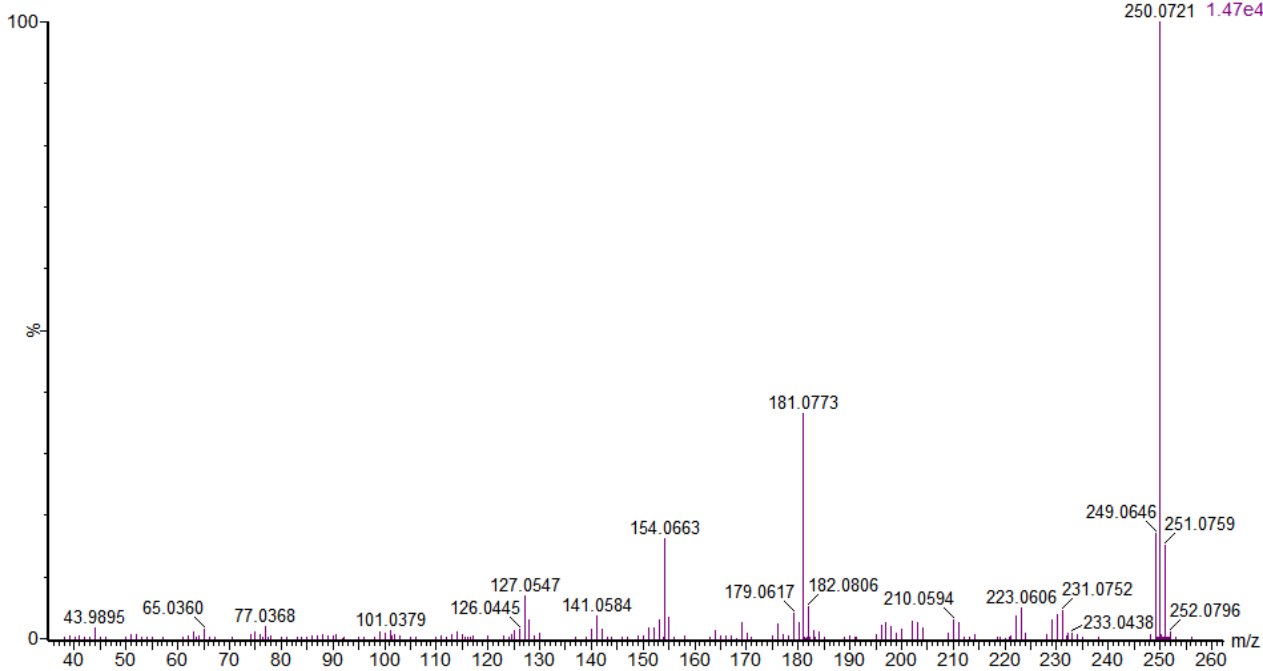



<sup>1</sup>H NMR spectrum of *trans-3ra*

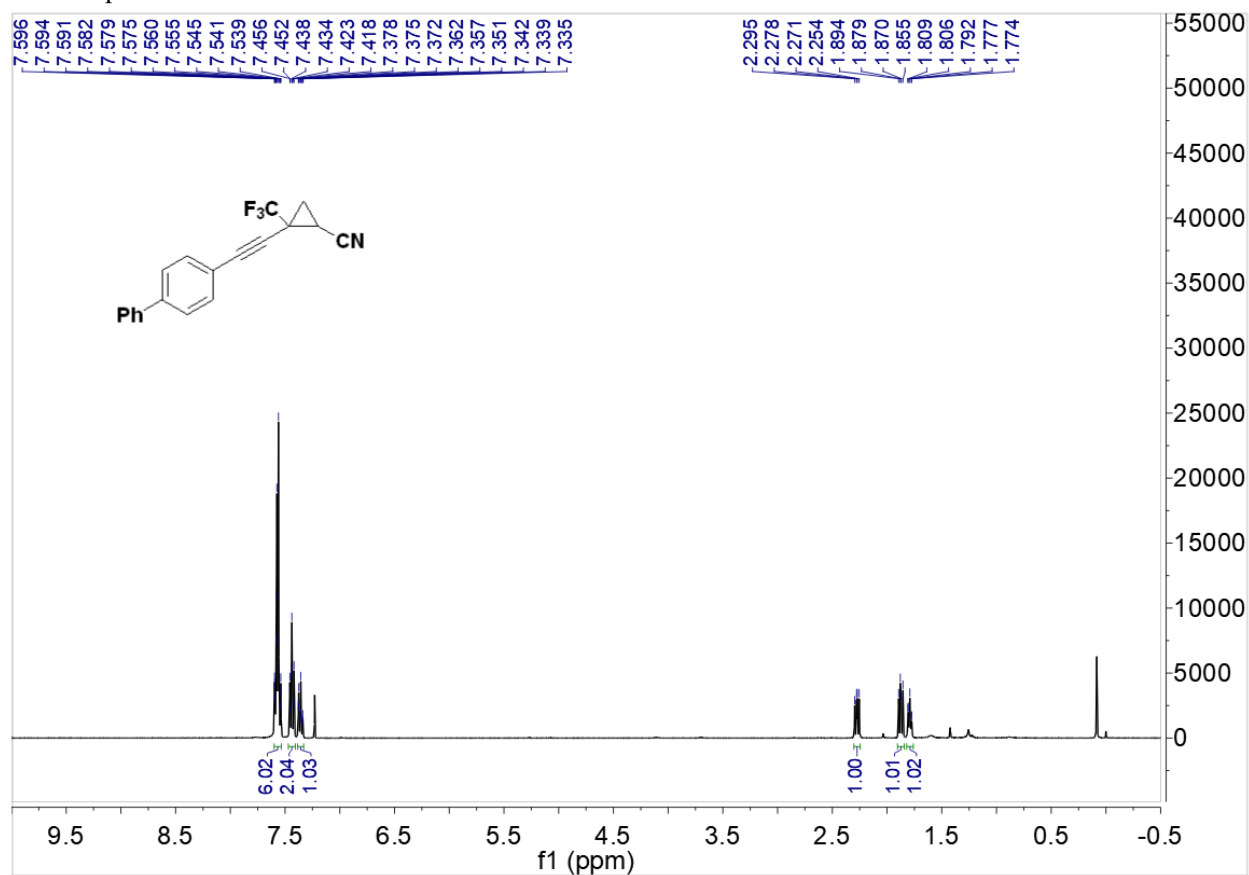

<sup>13</sup>C NMR spectrum of *trans-3ra*

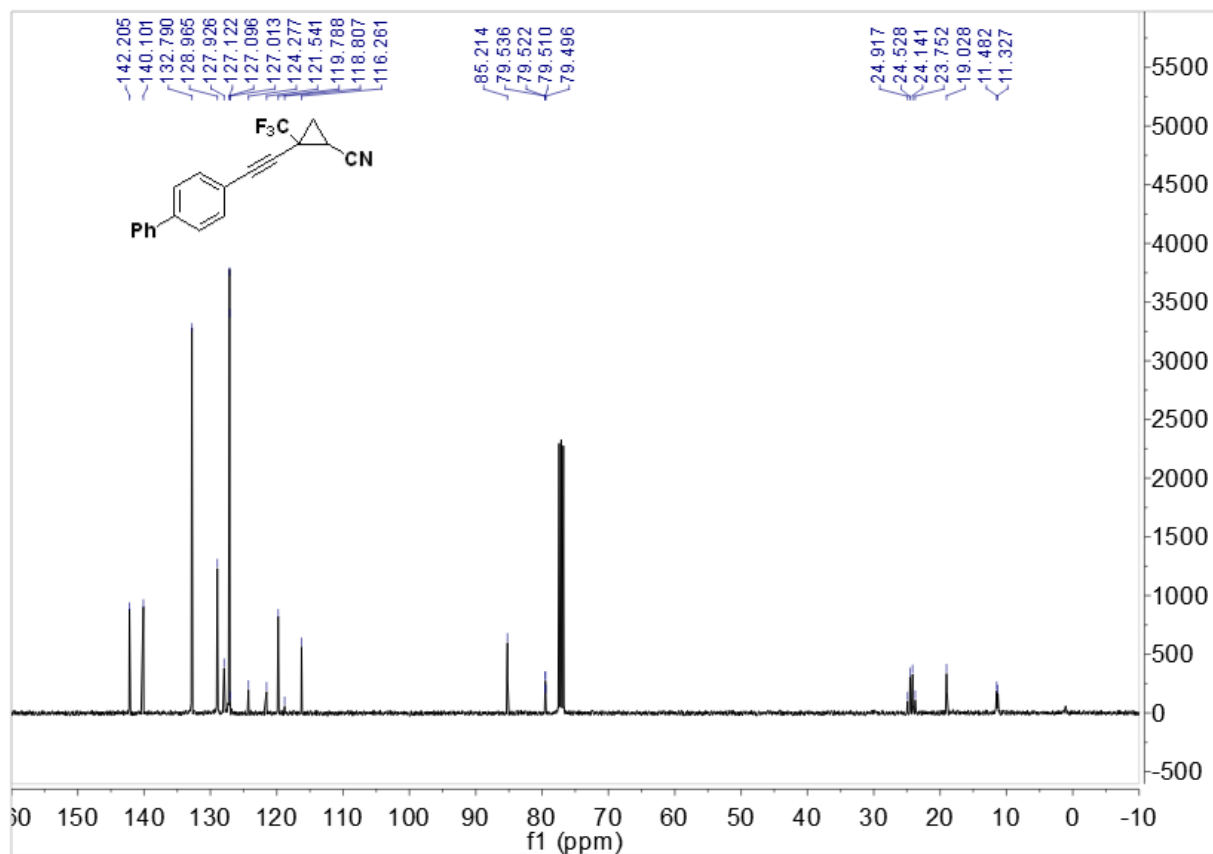

$^{19}\text{F}$  NMR spectrum of *trans*-3ra

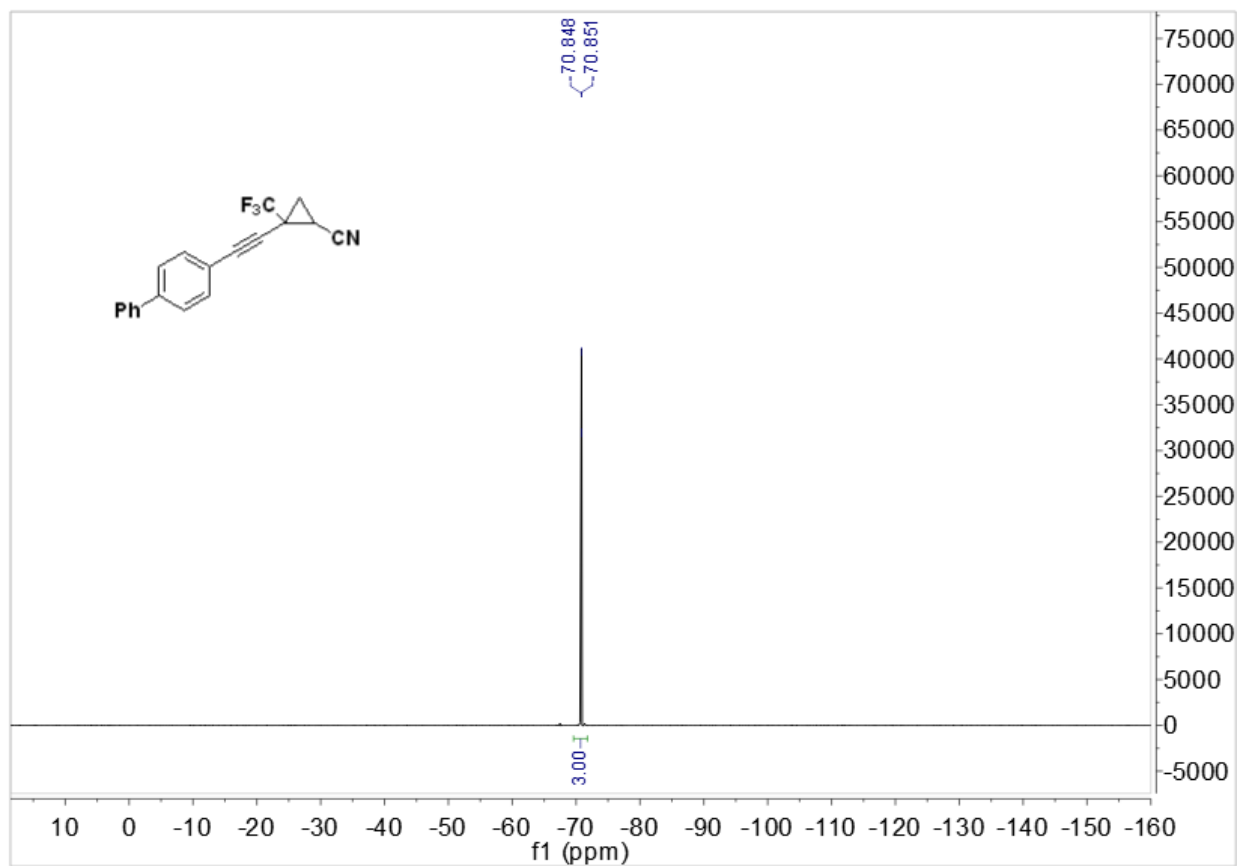

HRMS (EI) spectrum of *trans*-3ra

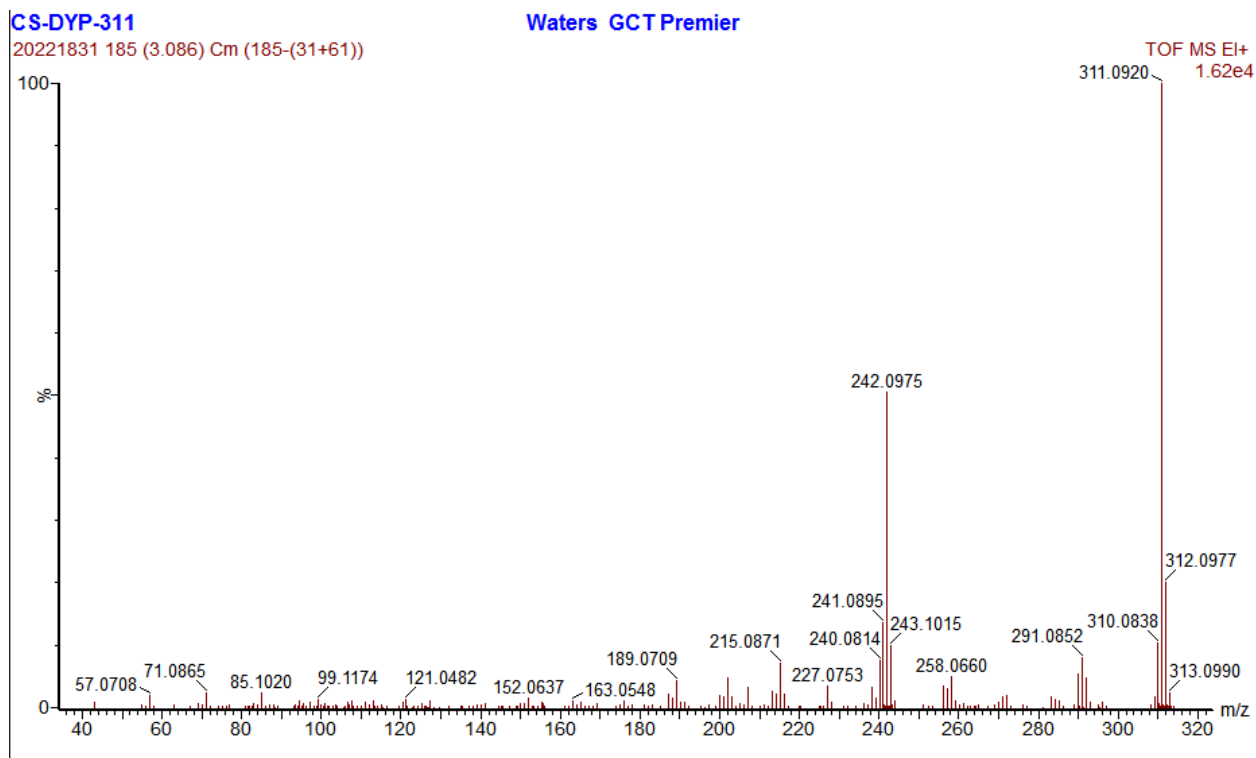

<sup>1</sup>H NMR spectrum of *trans*-3sa

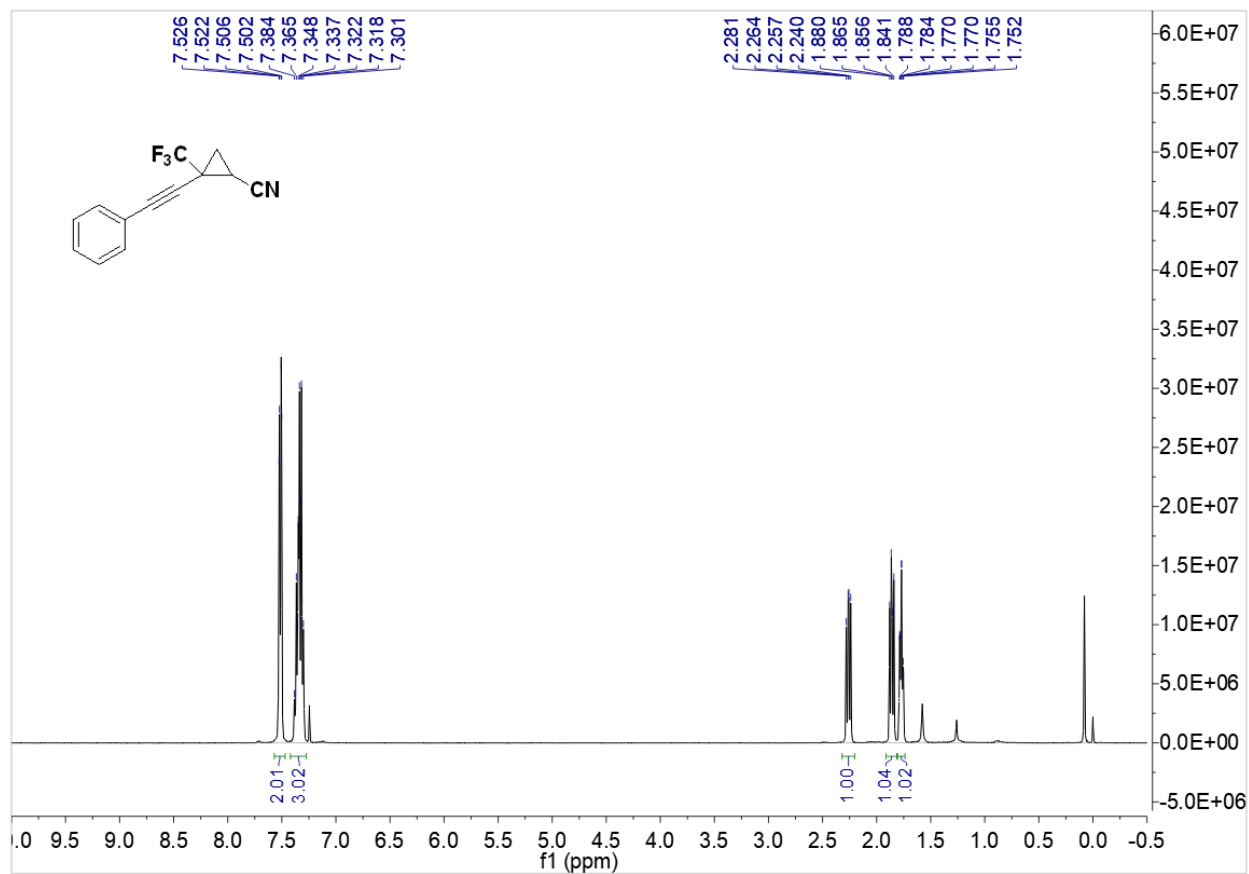

<sup>13</sup>C NMR spectrum of *trans*-3sa

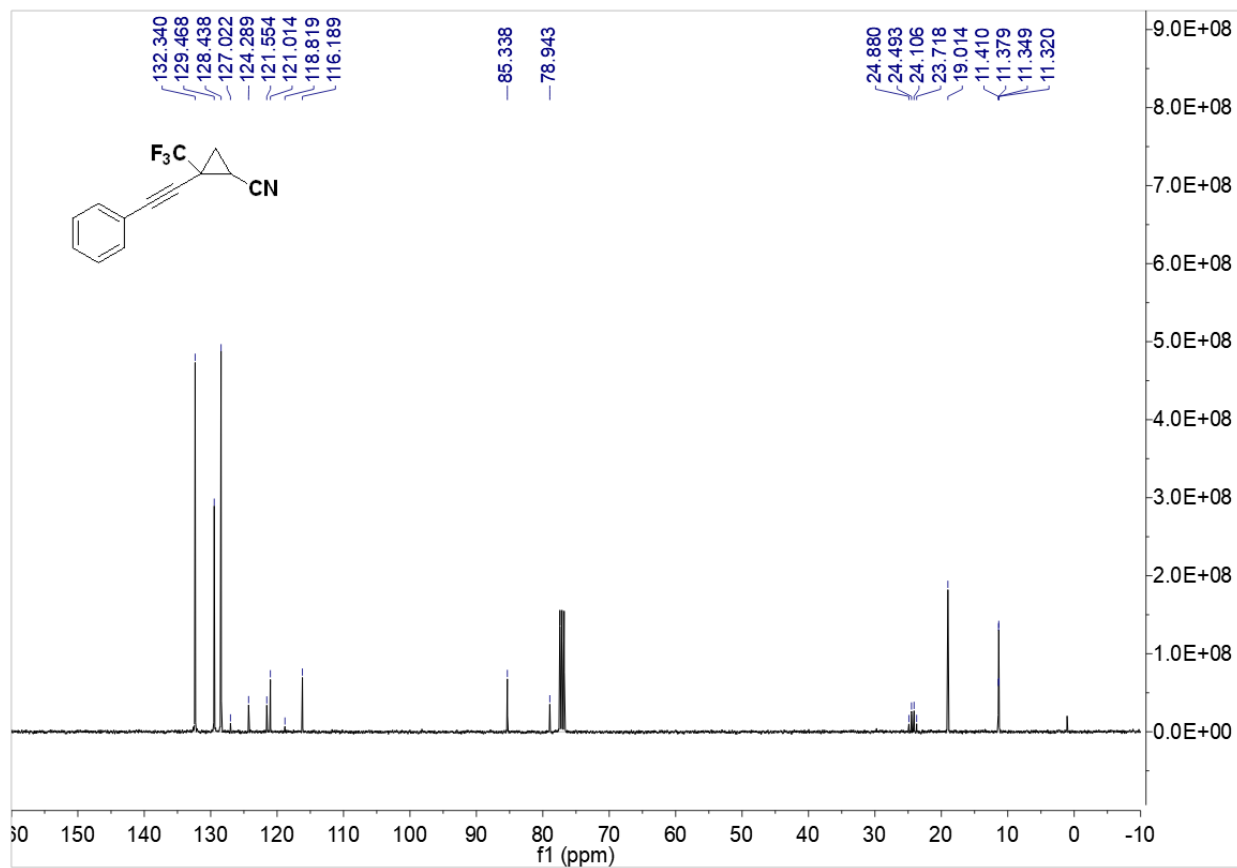

$^{19}\text{F}$  NMR spectrum of *trans*-3sa

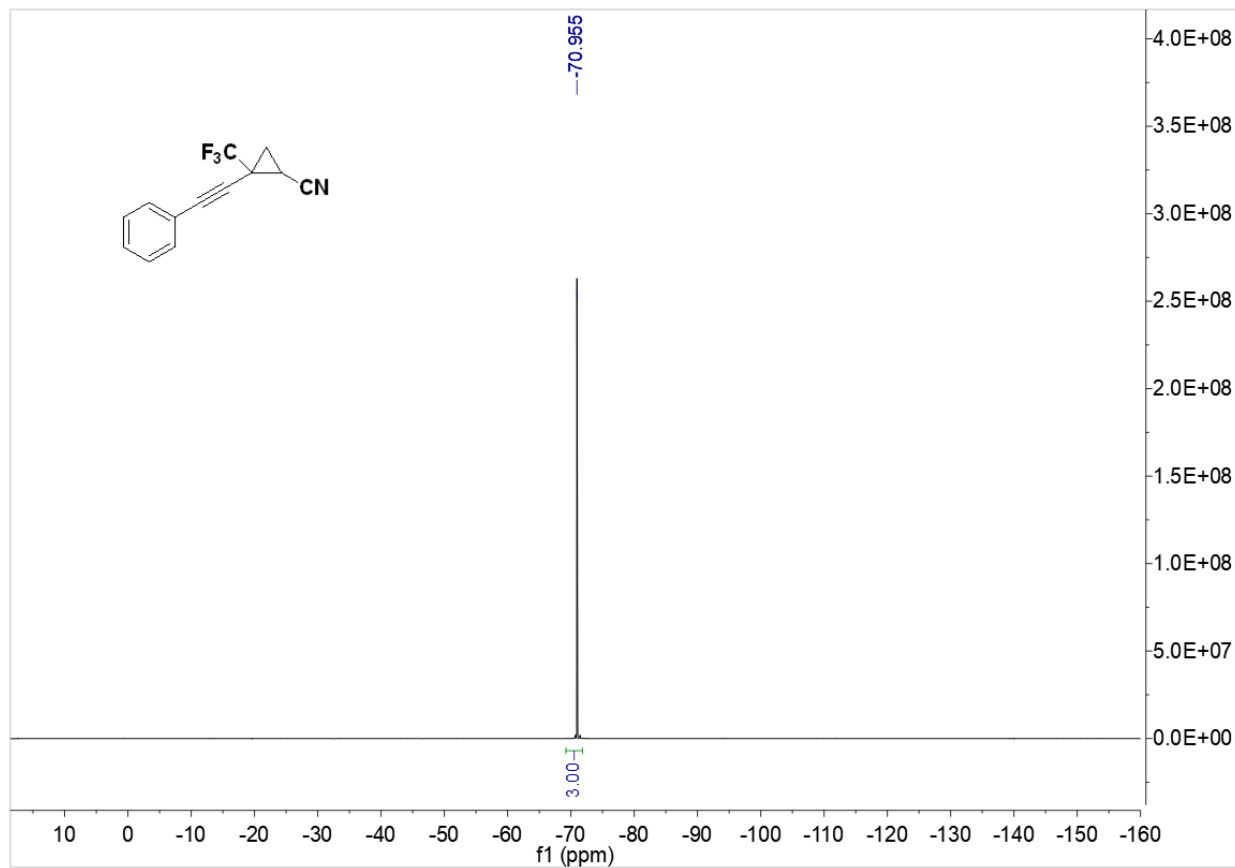

HRMS (EI) spectrum of *trans*-3sa

CS-DYP-235

Waters GCT Premier

20222054 141 (1.985) Cm (141-(53+60))

TOF MS EI+  
235.0607 1.84e4

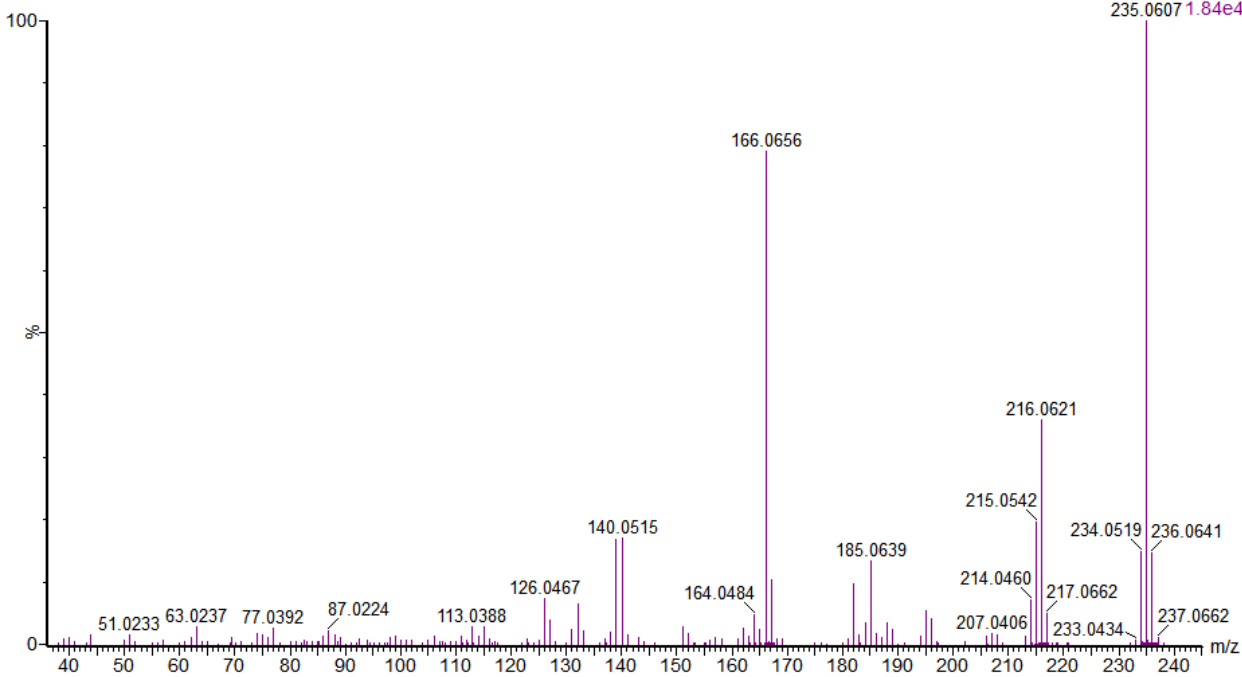

<sup>1</sup>H NMR spectrum of *cis-3sa*

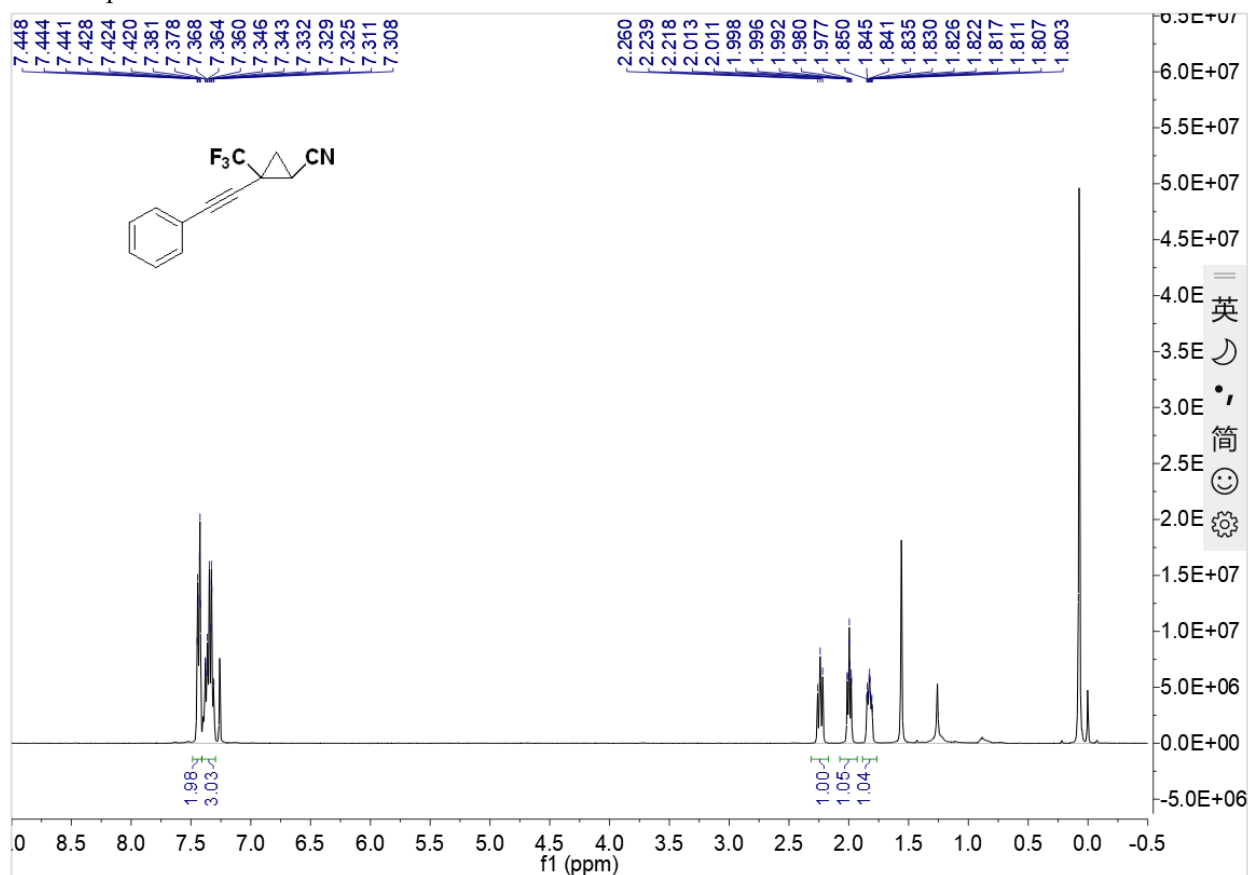

<sup>13</sup>C NMR spectrum of *cis-3sa*

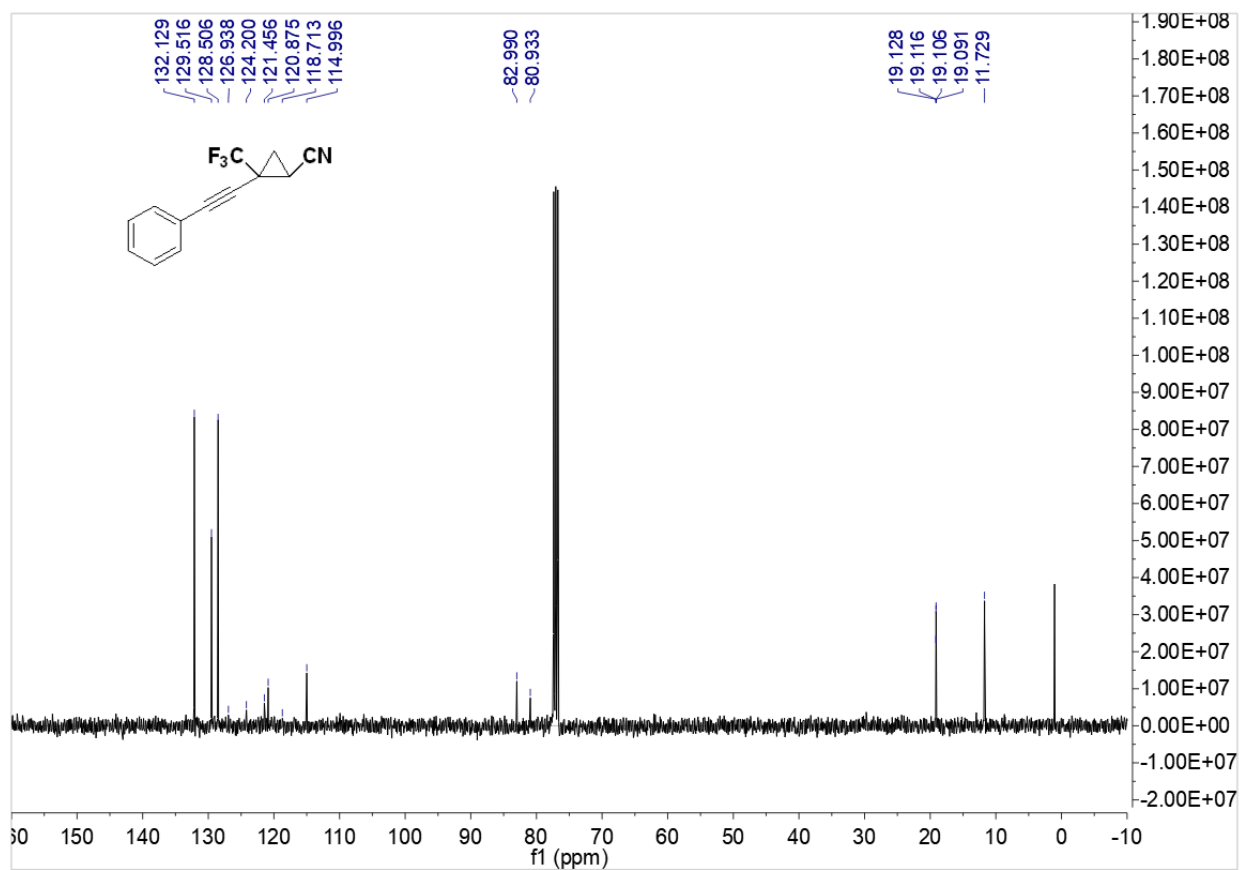

<sup>19</sup>F NMR spectrum of *cis*-3sa

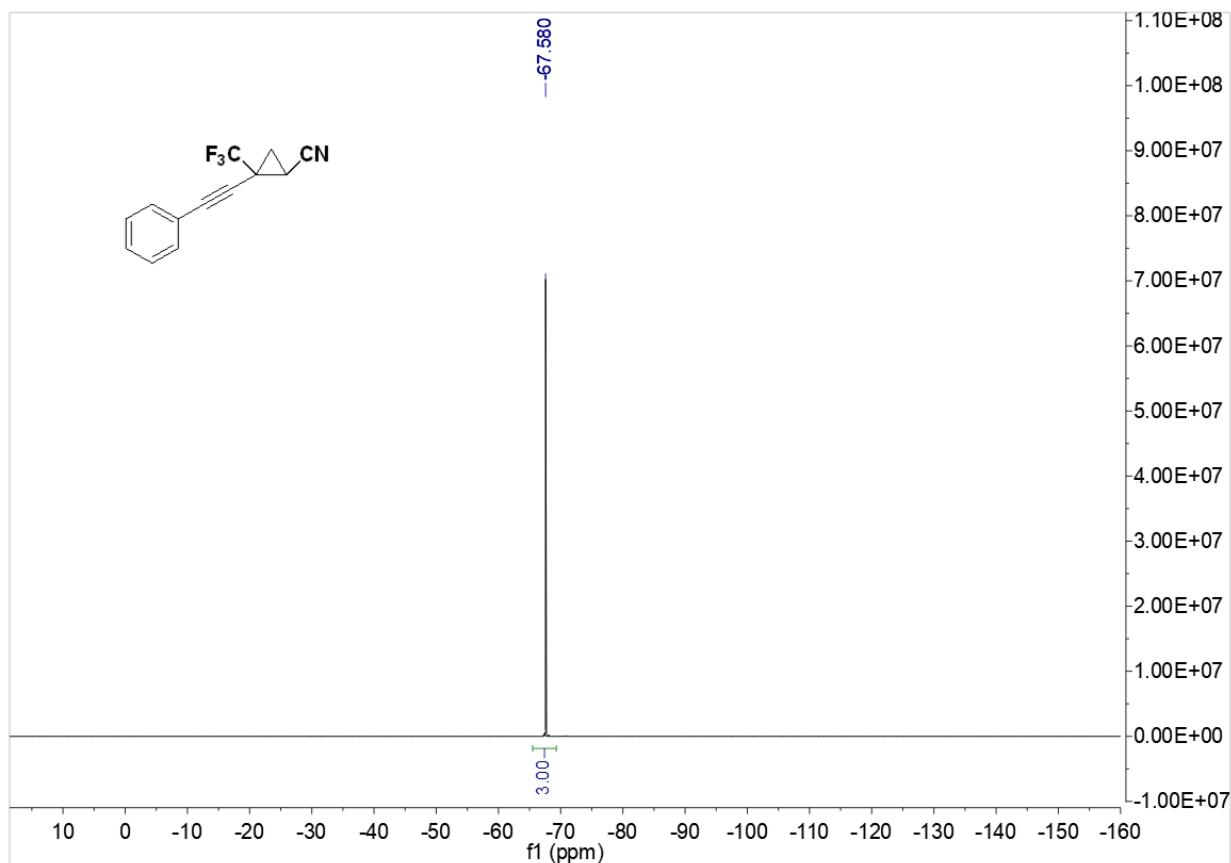

<sup>1</sup>H NMR spectrum of 3qc

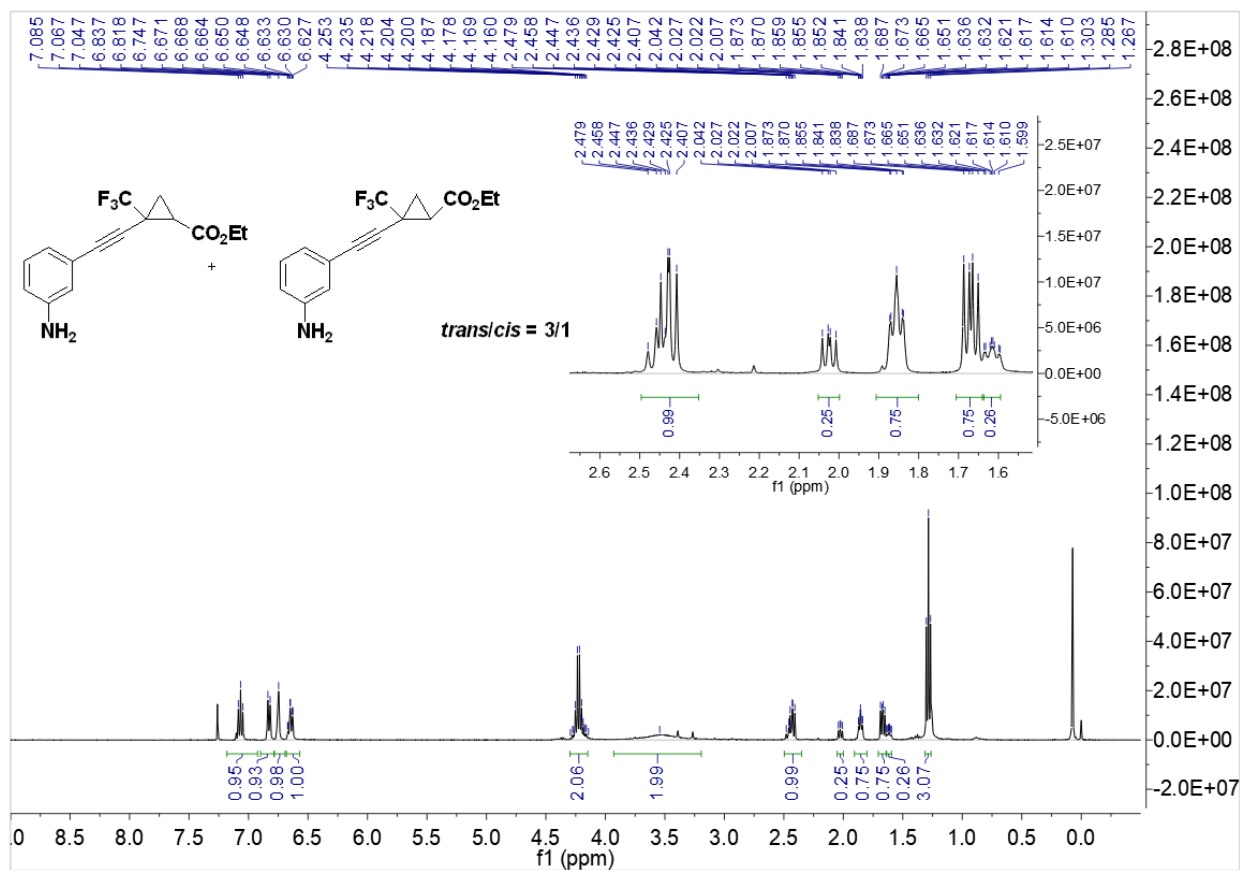

<sup>13</sup>C NMR spectrum of **3qc**

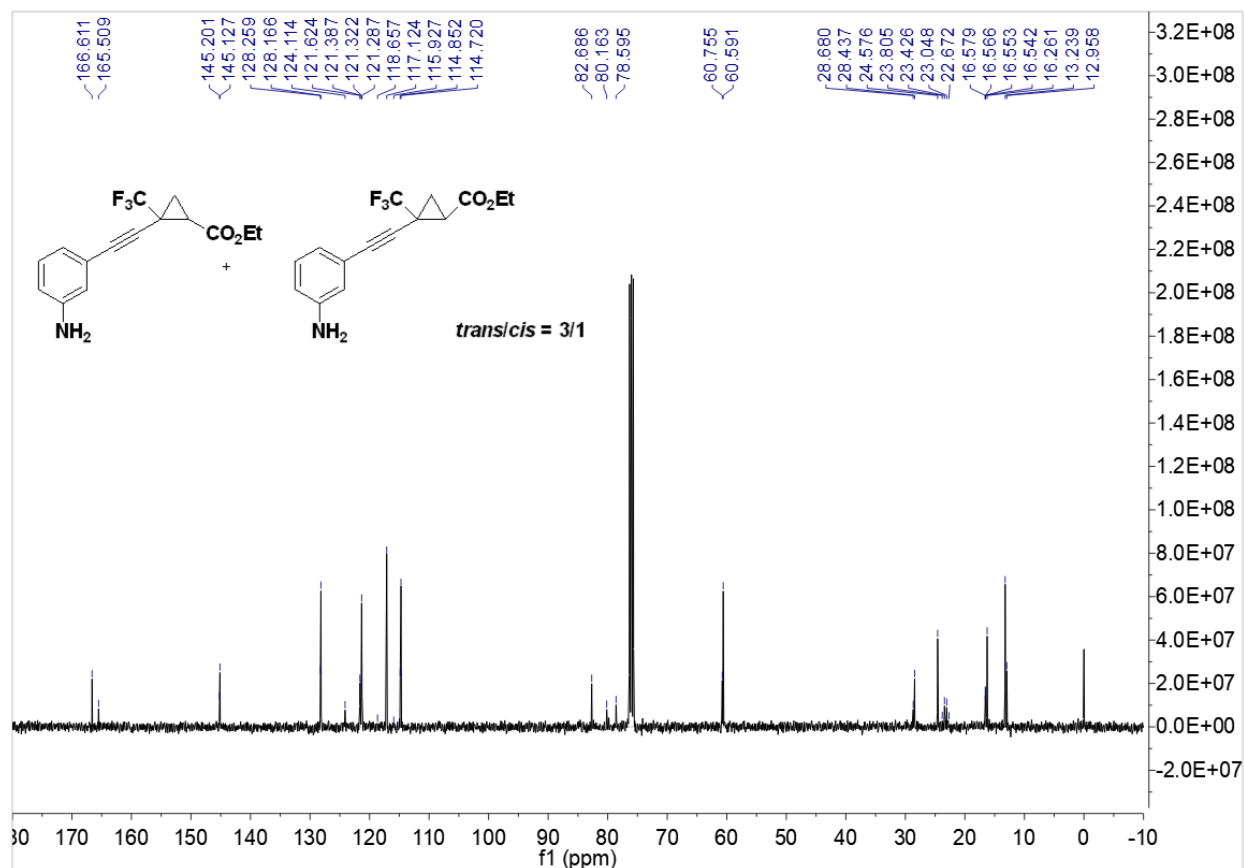

<sup>19</sup>F NMR spectrum of **3qc**

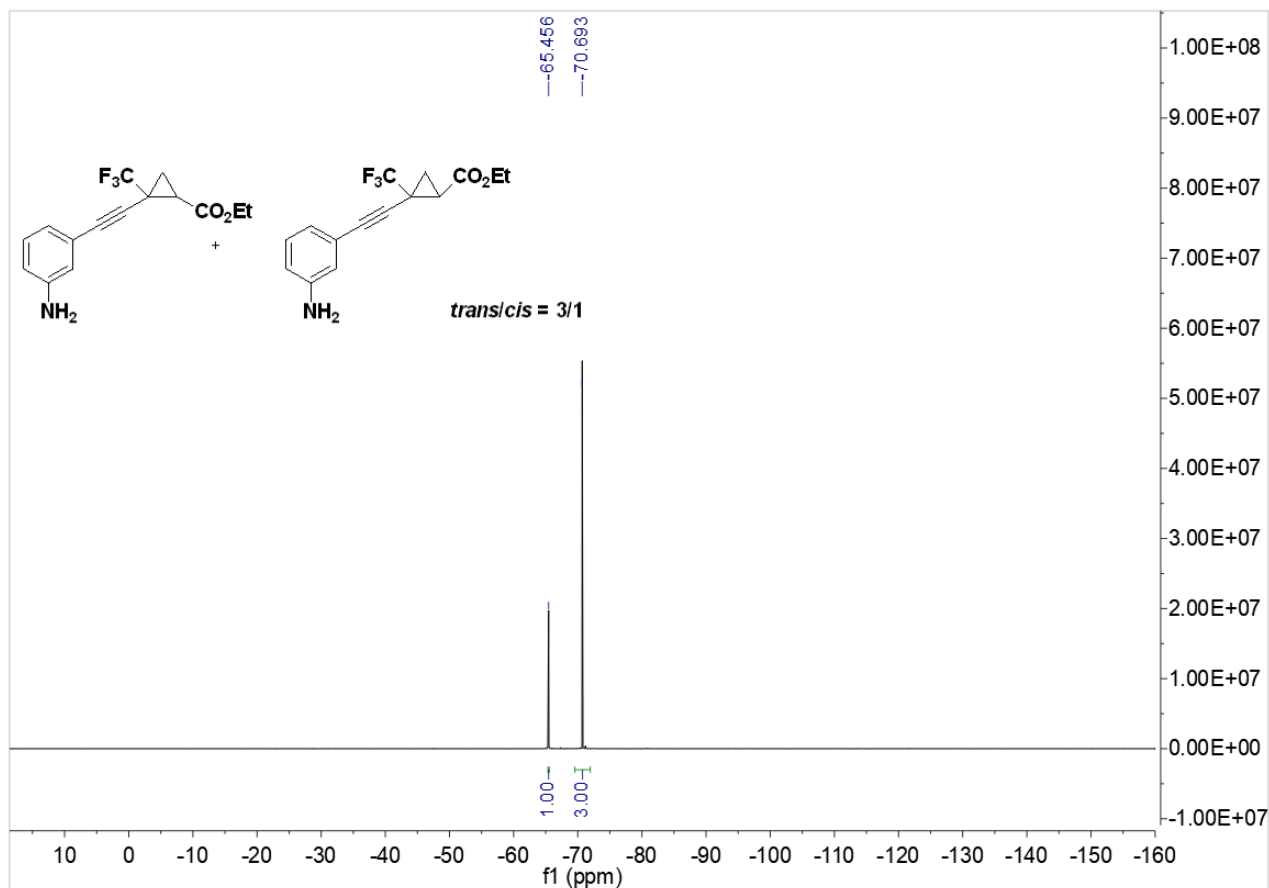

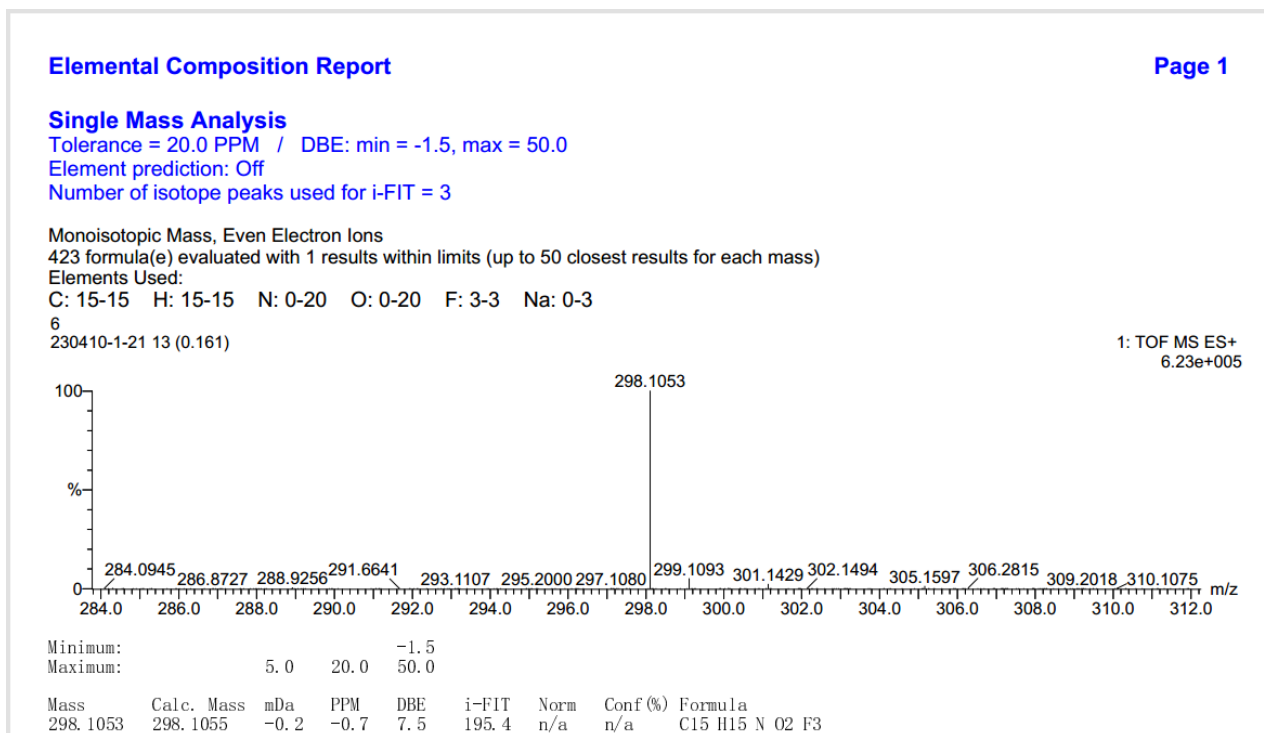

<sup>1</sup>H NMR spectrum of *trans*-**3rc**

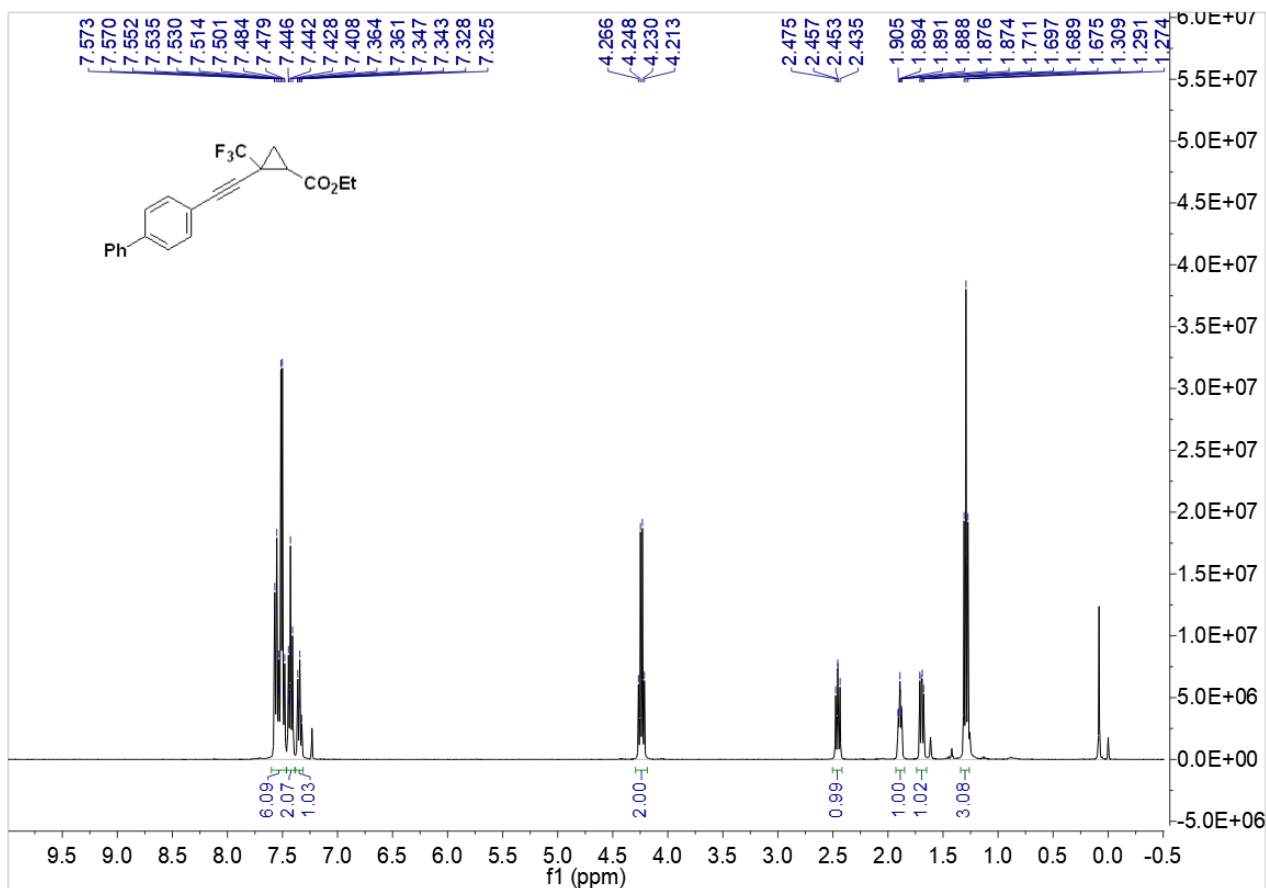



$^{13}\text{C}$  NMR spectrum of *trans*-3rc

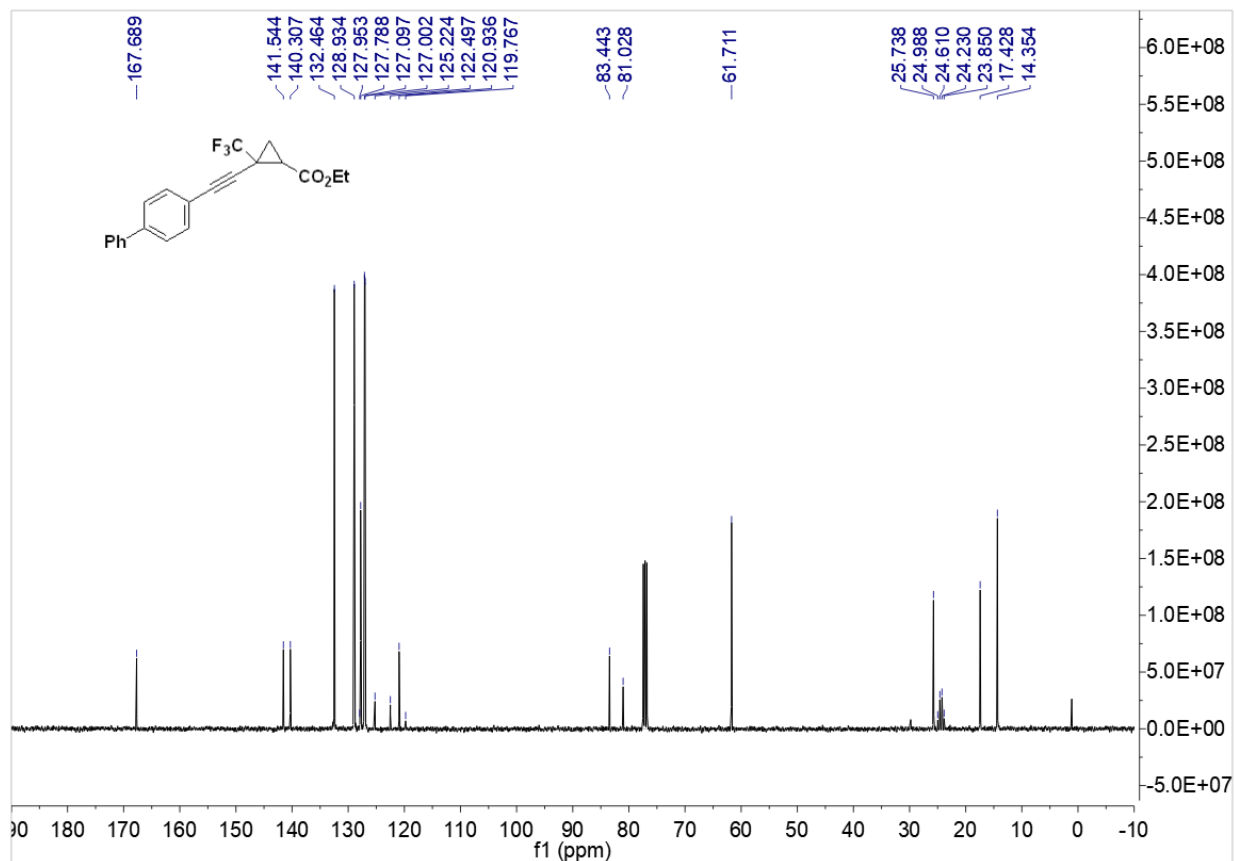

$^{19}\text{F}$  NMR spectrum of *trans*-3rc

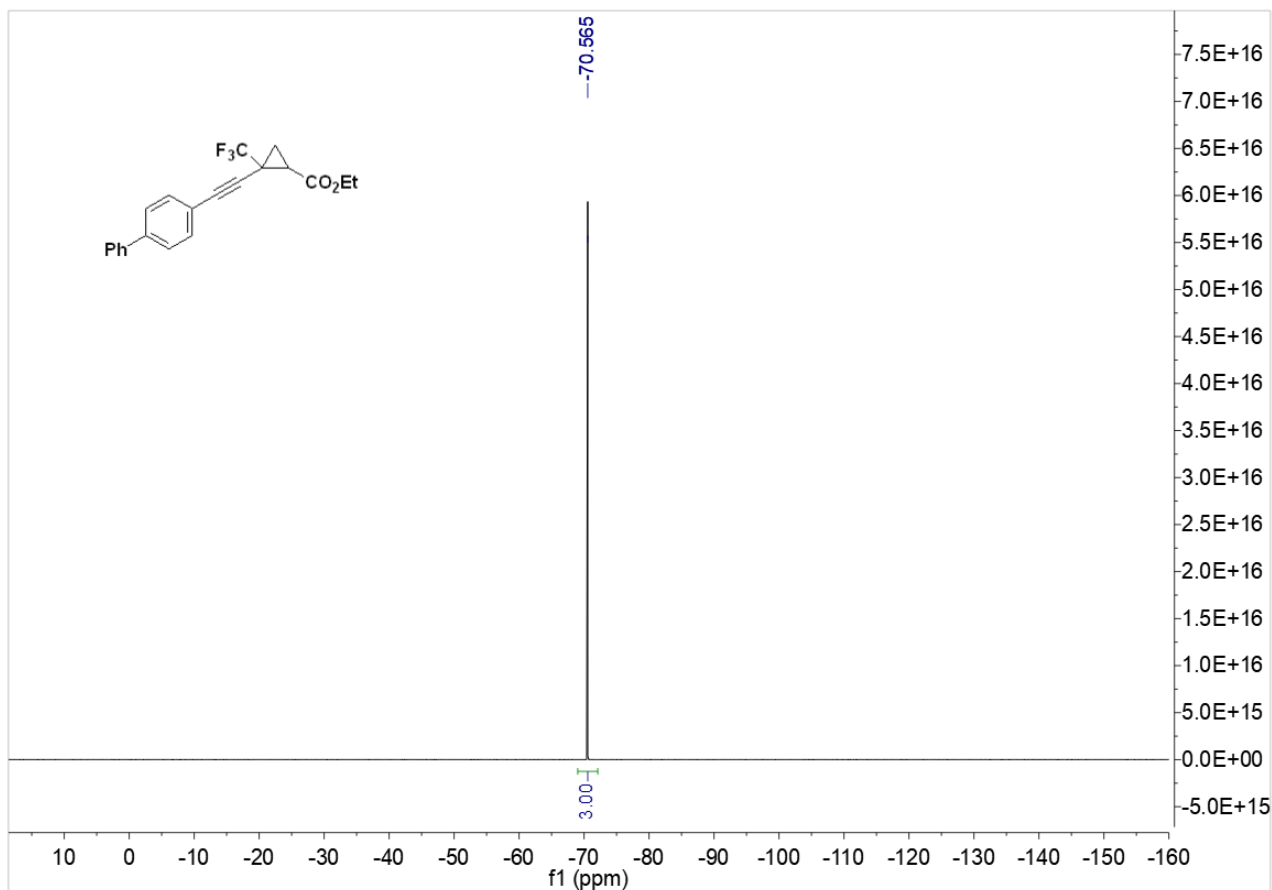

HRMS (EI) spectrum of *trans*-3rc

CS-DYP-358

Waters GCT Premier

20222062 617 (10.290) Cm (617-(66+68))

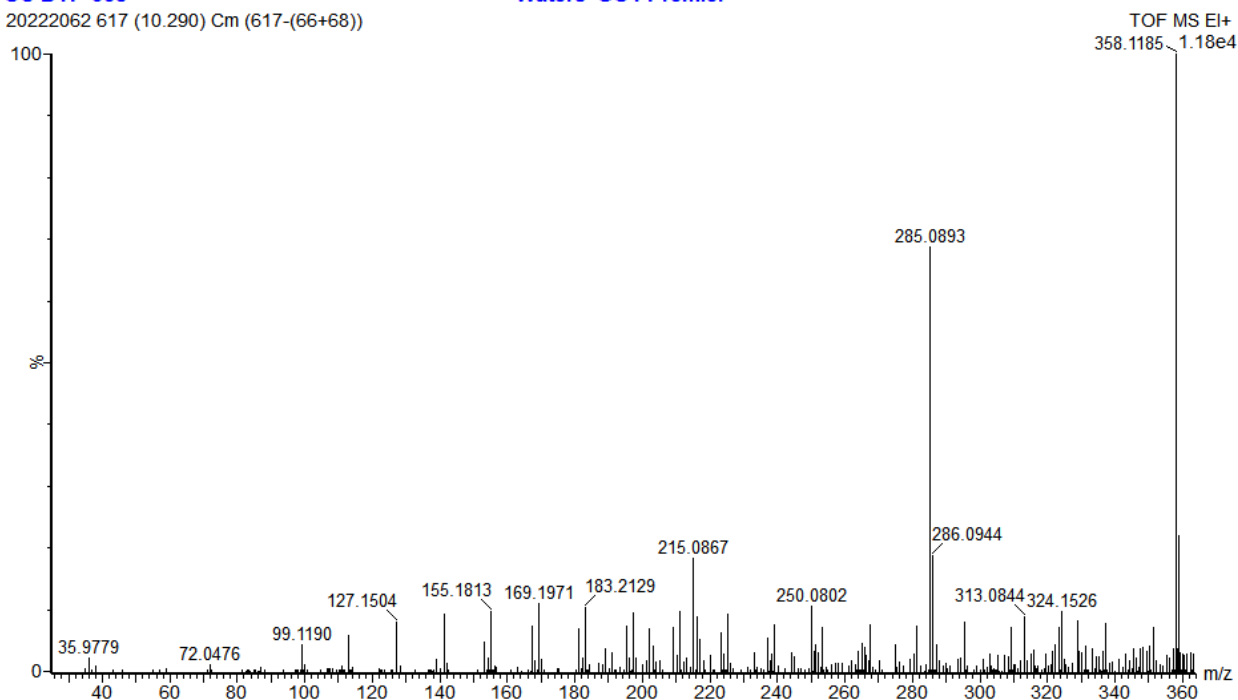

<sup>1</sup>H NMR spectrum of *trans*-3sc

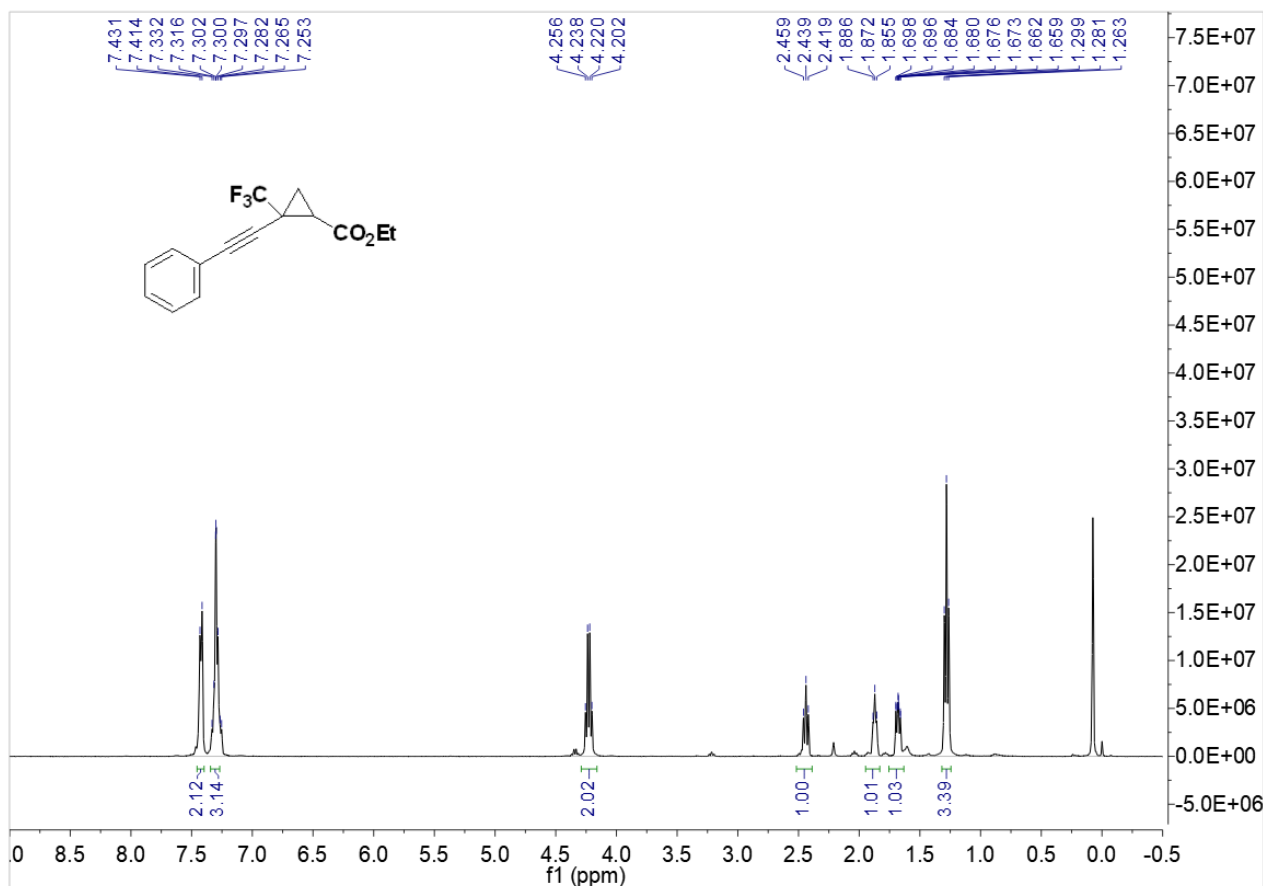

<sup>13</sup>C NMR spectrum of *trans*-3sc

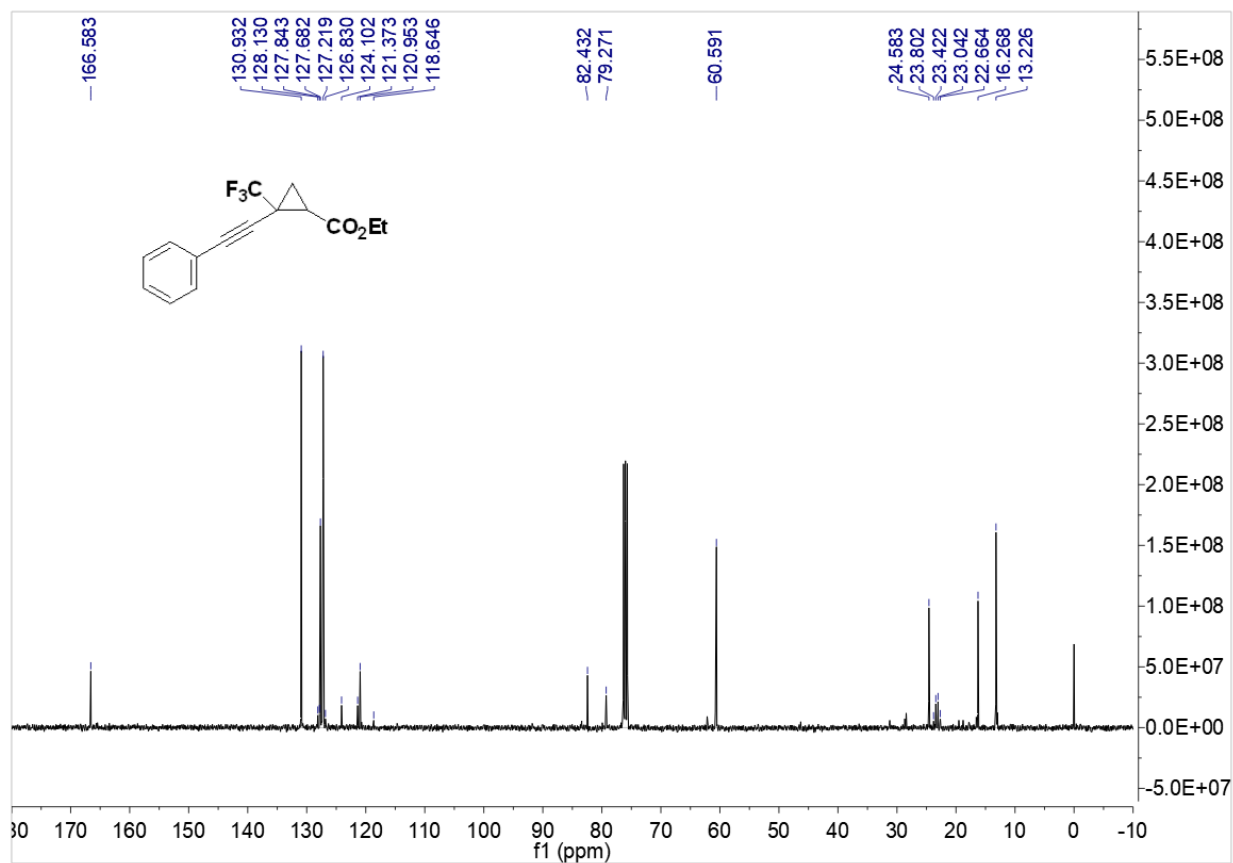

<sup>19</sup>F NMR spectrum of *trans*-3sc

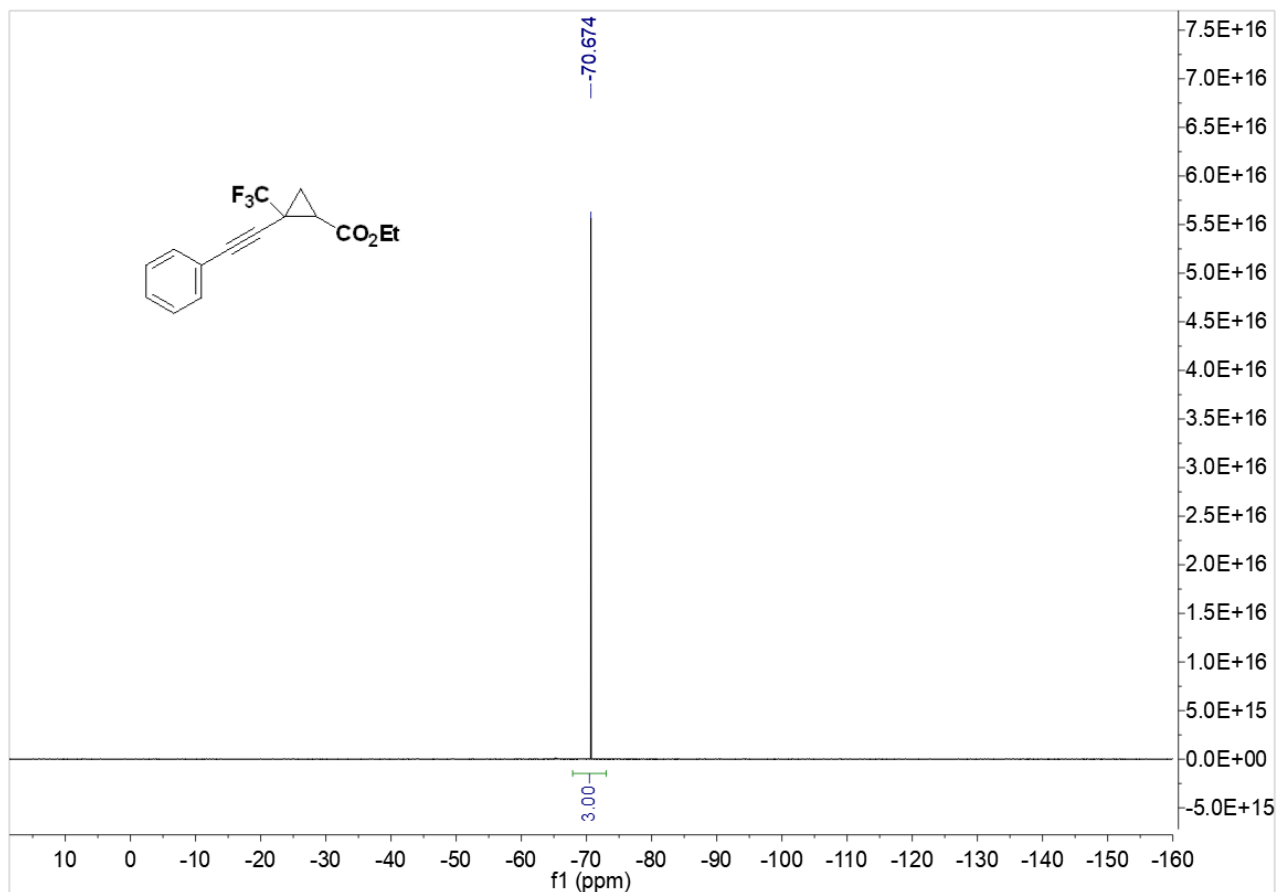

**Elemental Composition Report**

**Single Mass Analysis**

Tolerance = 20.0 PPM / DBE: min = -1.5, max = 50.0

Element prediction: Off

Number of isotope peaks used for i-FIT = 3

Monoisotopic Mass, Even Electron Ions

374 formula(e) evaluated with 1 results within limits (up to 50 closest results for each mass)

Elements Used:

C: 15-15 H: 14-14 N: 0-20 O: 0-20 F: 3-3 Na: 0-3

6

230410-1-20 5 (0.076)

1: TOF MS ES+  
2.94e+006

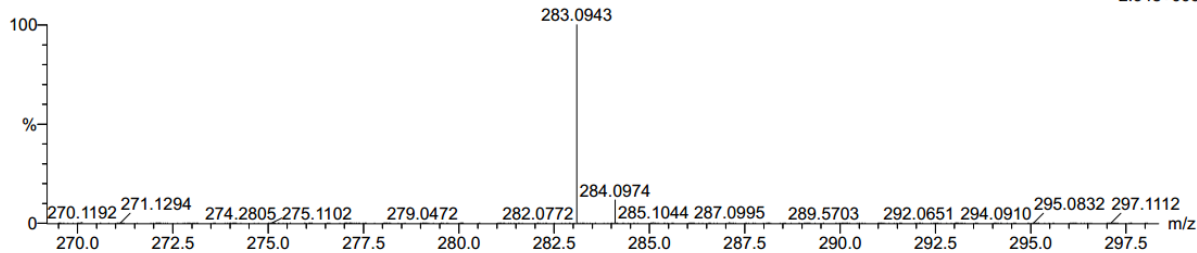

Minimum: -1.5  
Maximum: 5.0 20.0 50.0

| Mass     | Calc. Mass | mDa  | PPM  | DBE | i-FIT | Norm | Conf (%) | Formula       |
|----------|------------|------|------|-----|-------|------|----------|---------------|
| 283.0943 | 283.0946   | -0.3 | -1.1 | 7.5 | 293.7 | n/a  | n/a      | C15 H14 O2 F3 |

11. GC-MS spectra of compounds *cis*-3ha, *cis*-3ia, *cis*-3ja, *cis*-3ka, *cis*-3la, *cis*-3oa and 3nc-isomer 2

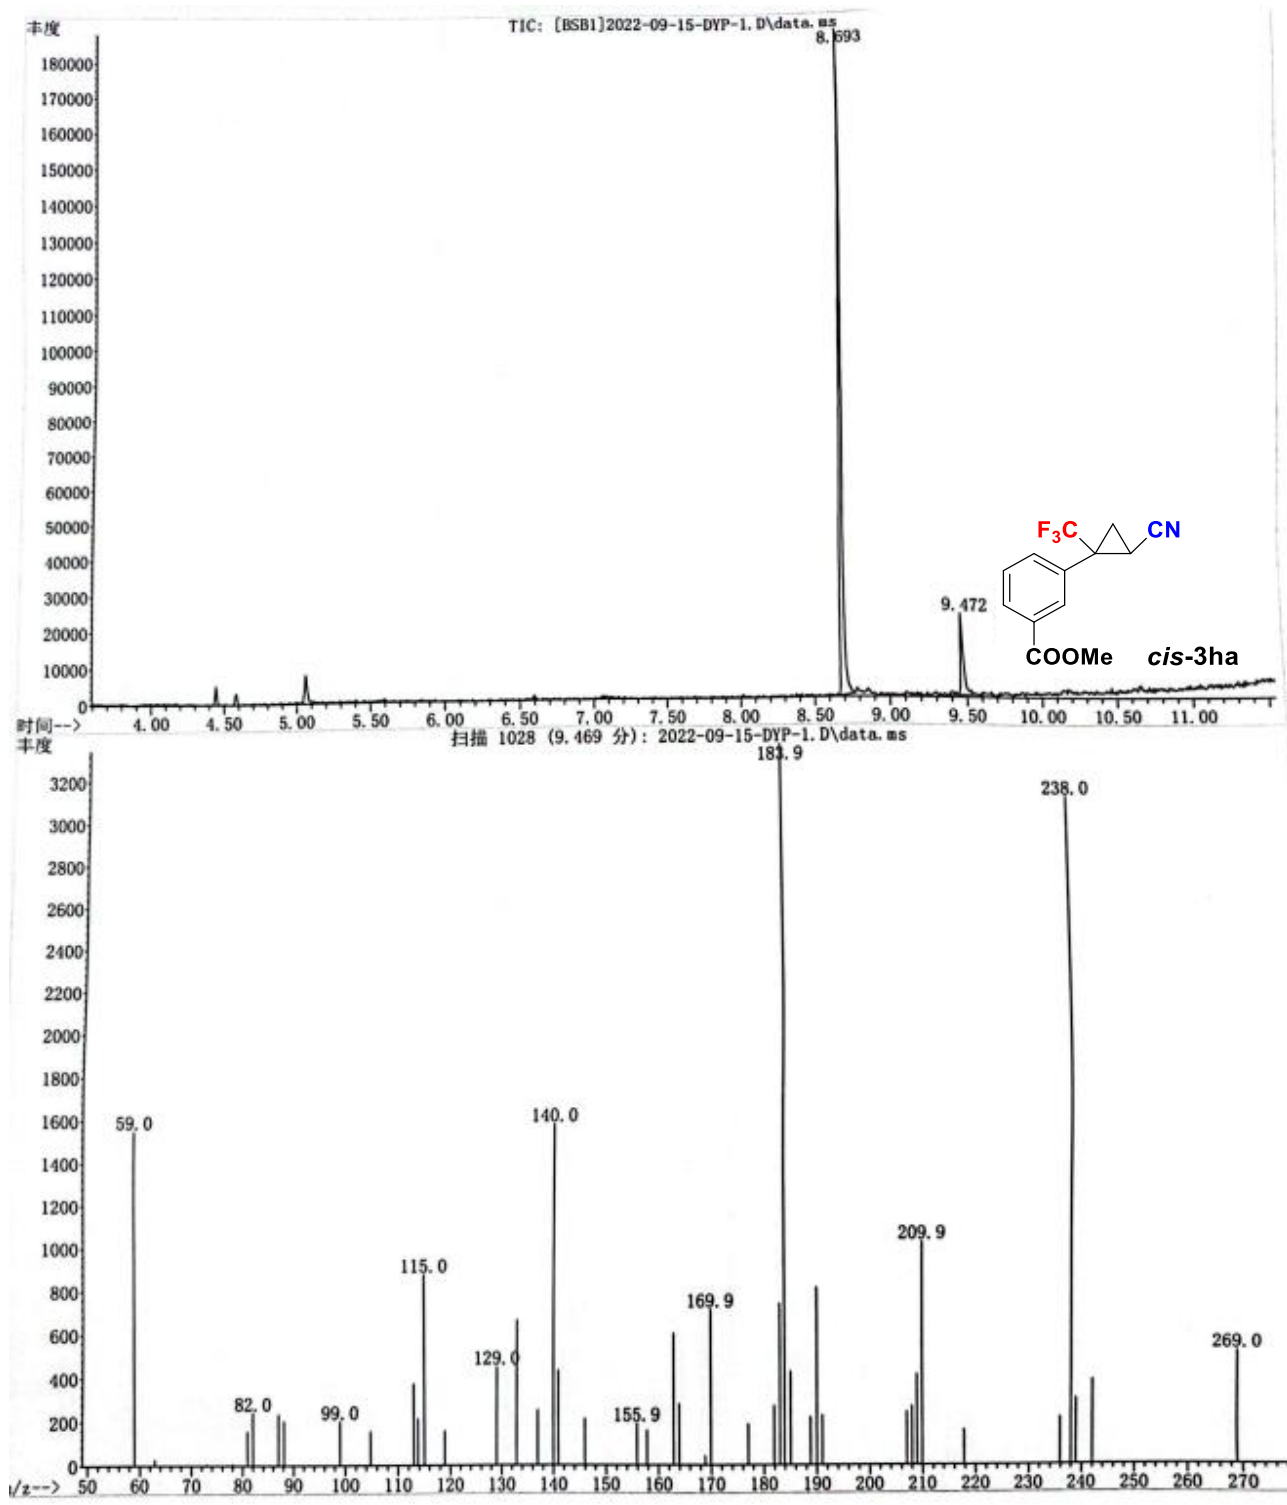

GC-MS spectrum of *cis-3ia*

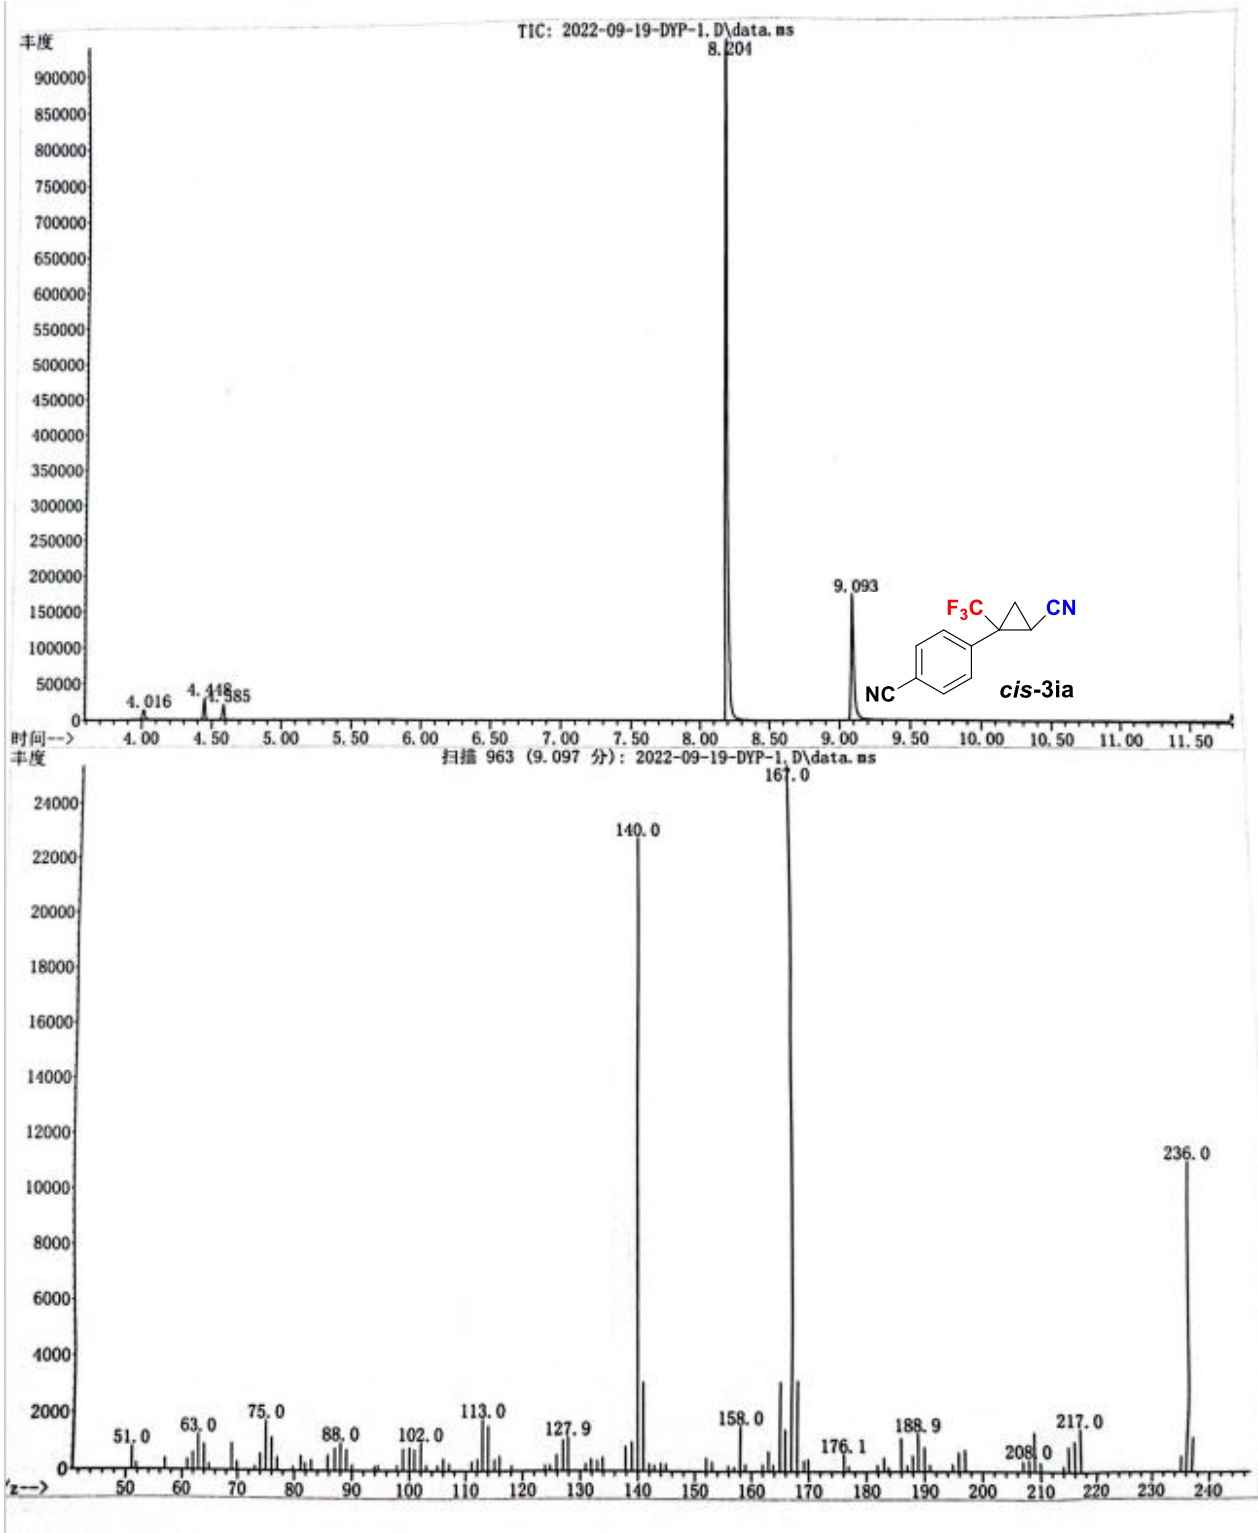

GC-MS spectrum of *cis*-3ja

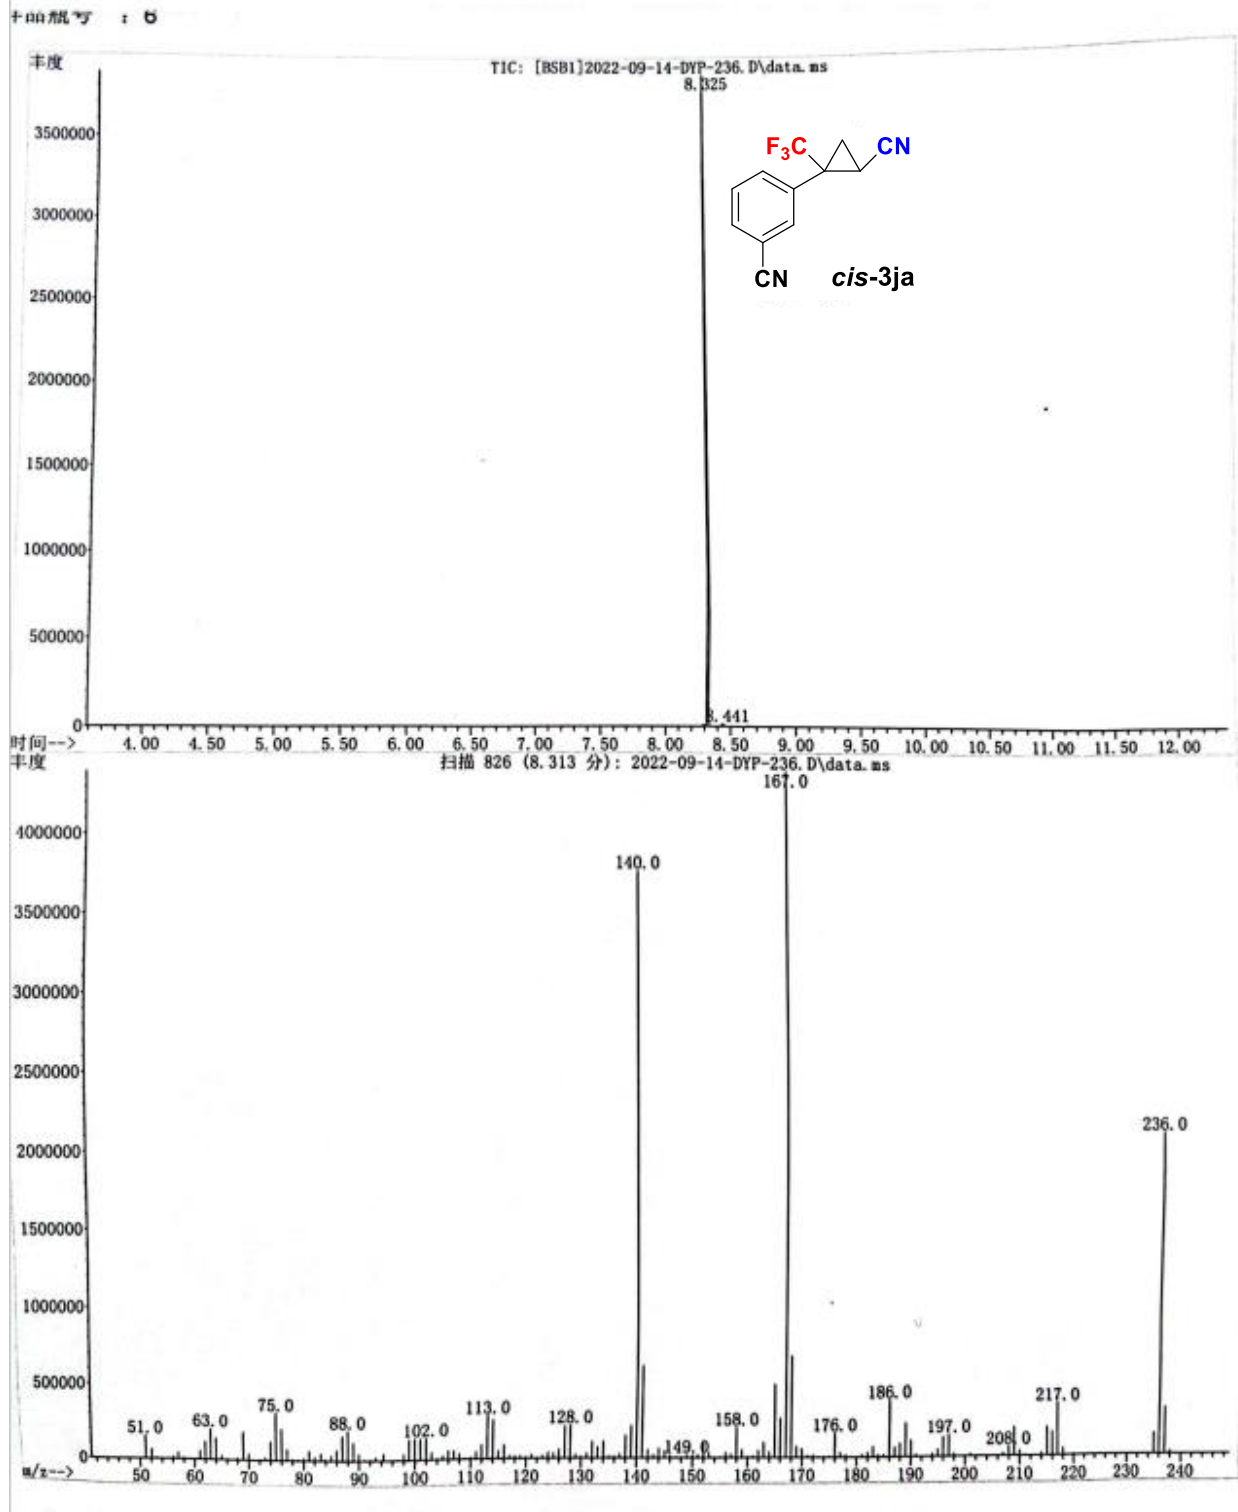

GC-MS spectrum of *cis*-3ka

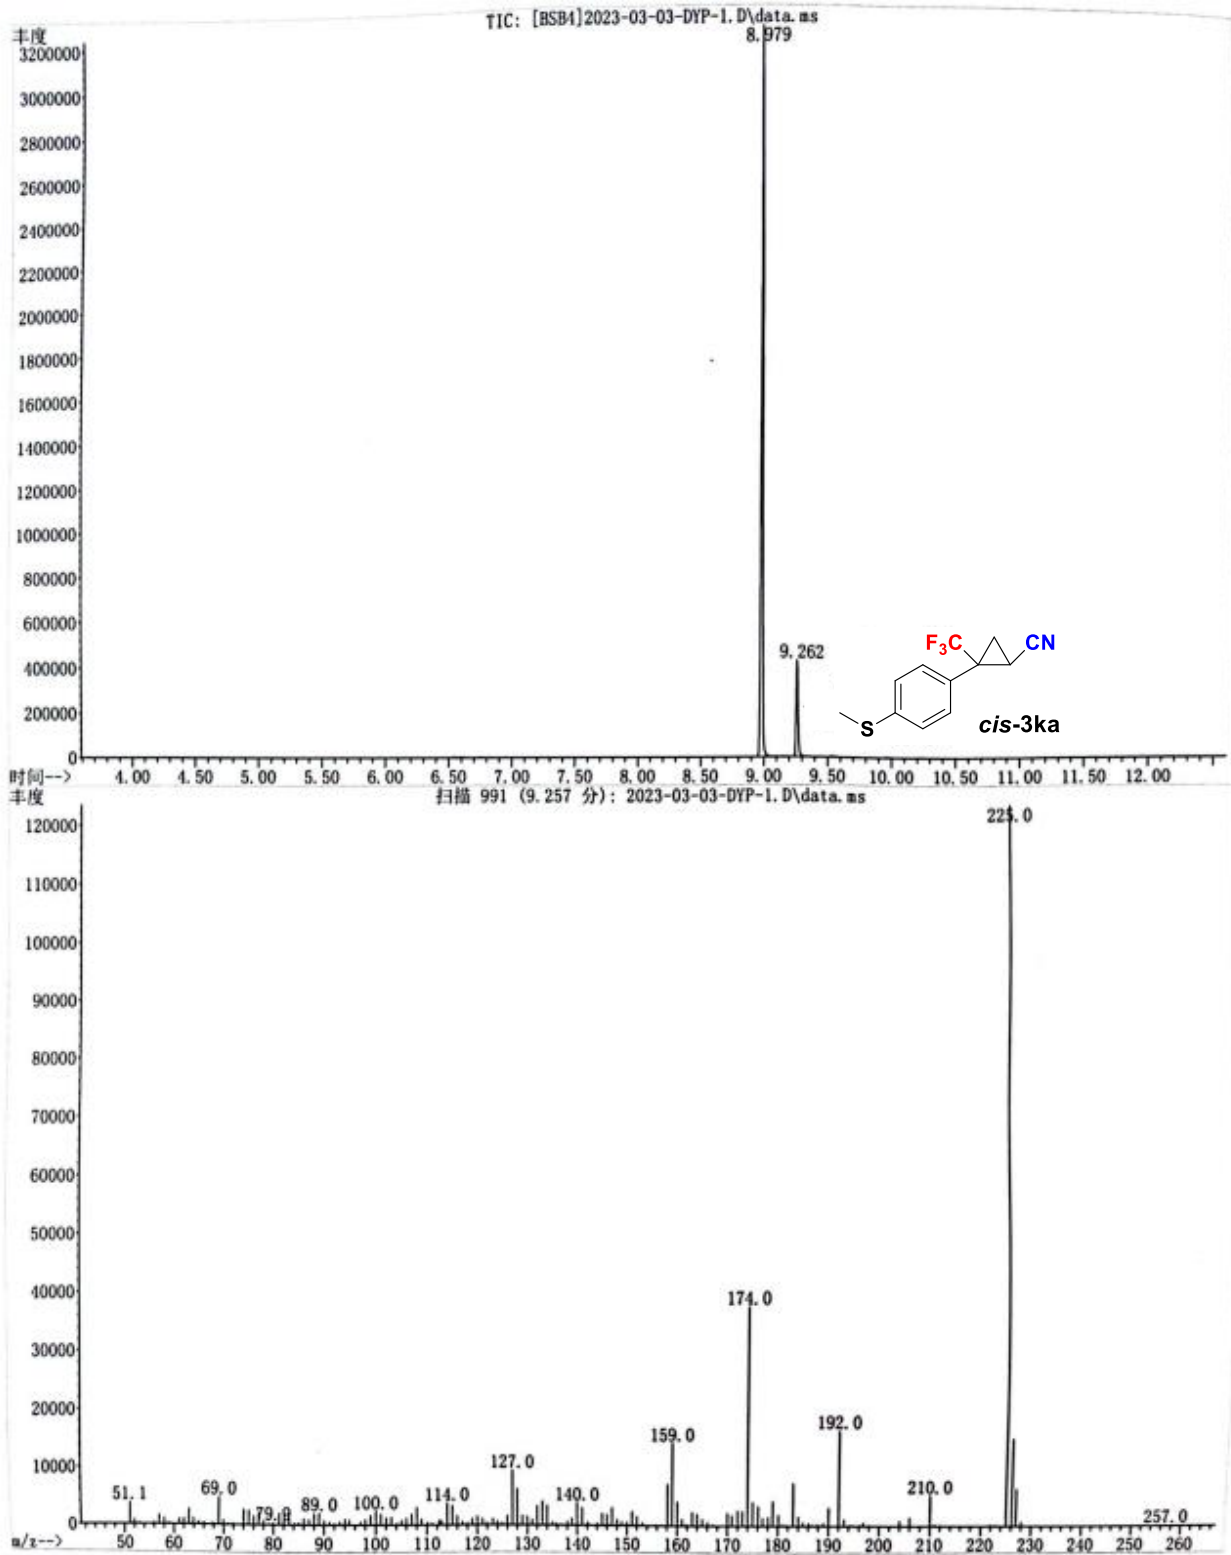



GC-MS spectrum of *cis*-3la

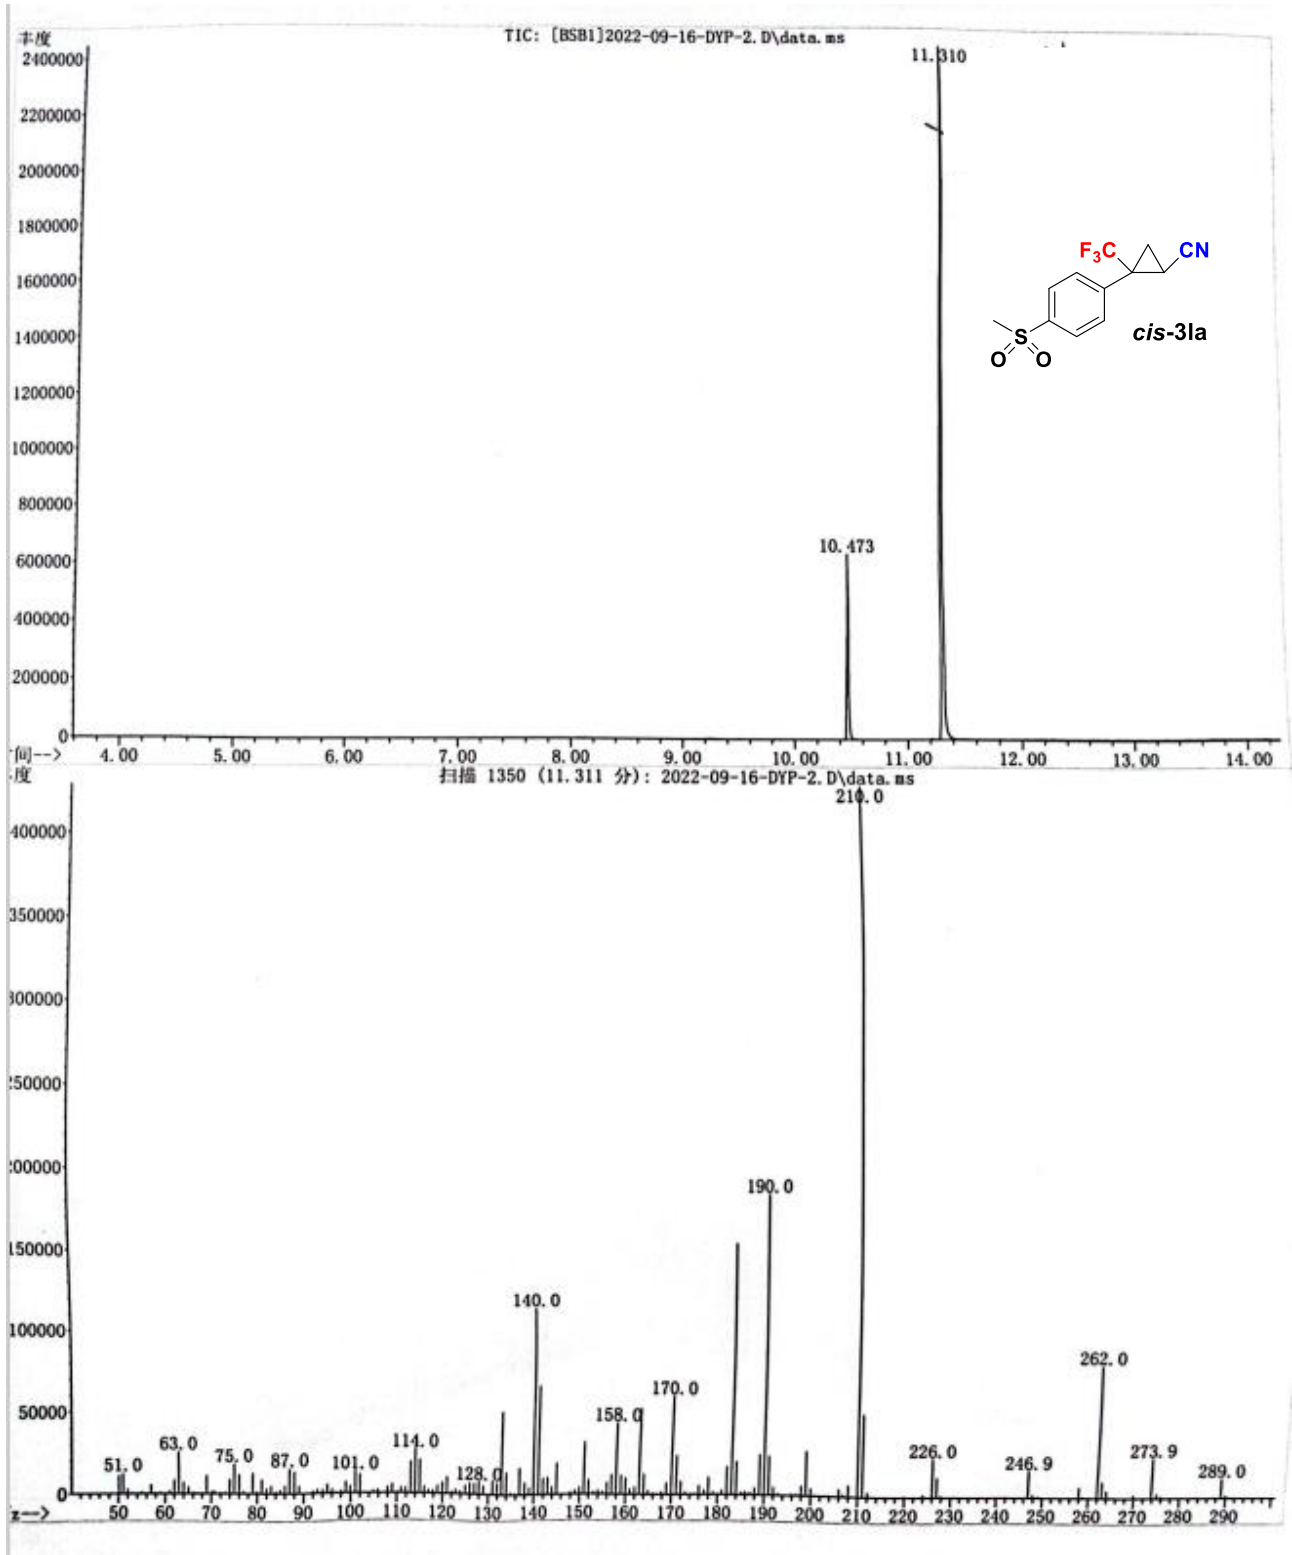

GC-MS spectrum of *cis*-3oa

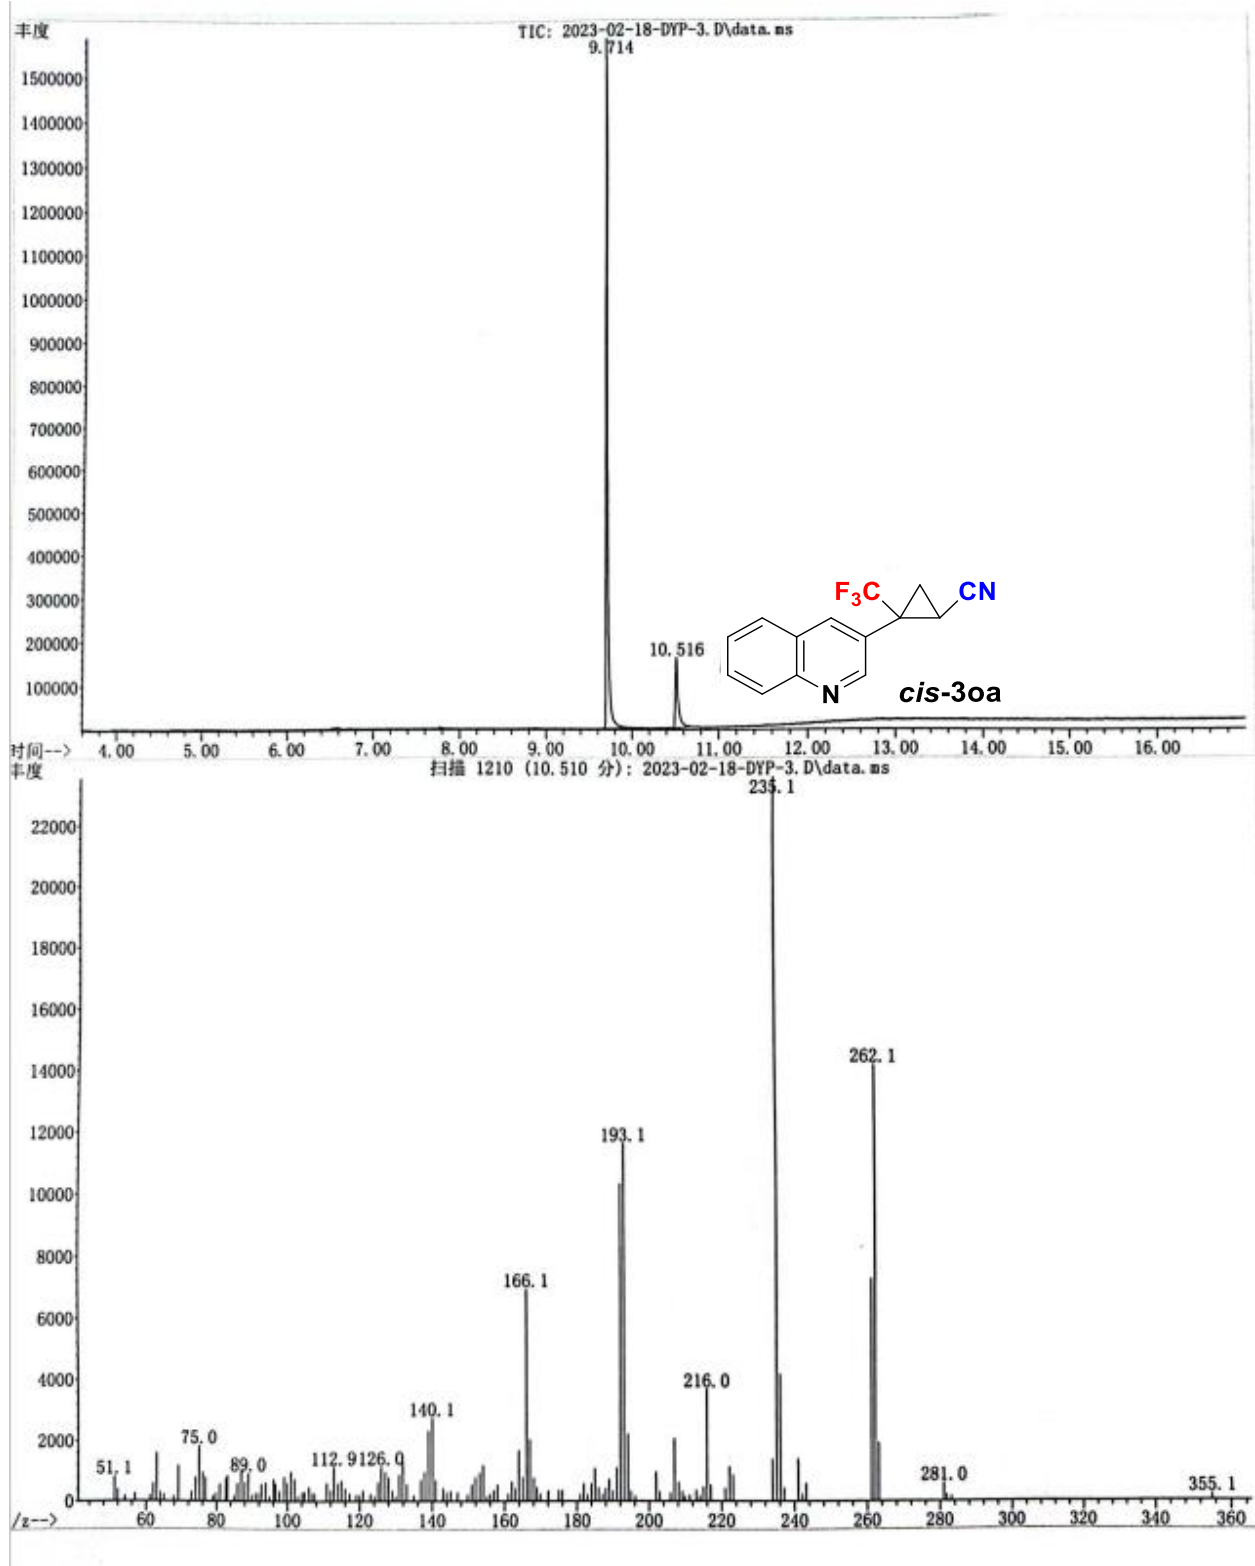

GC-MS spectrum of 3nc-isomer 2

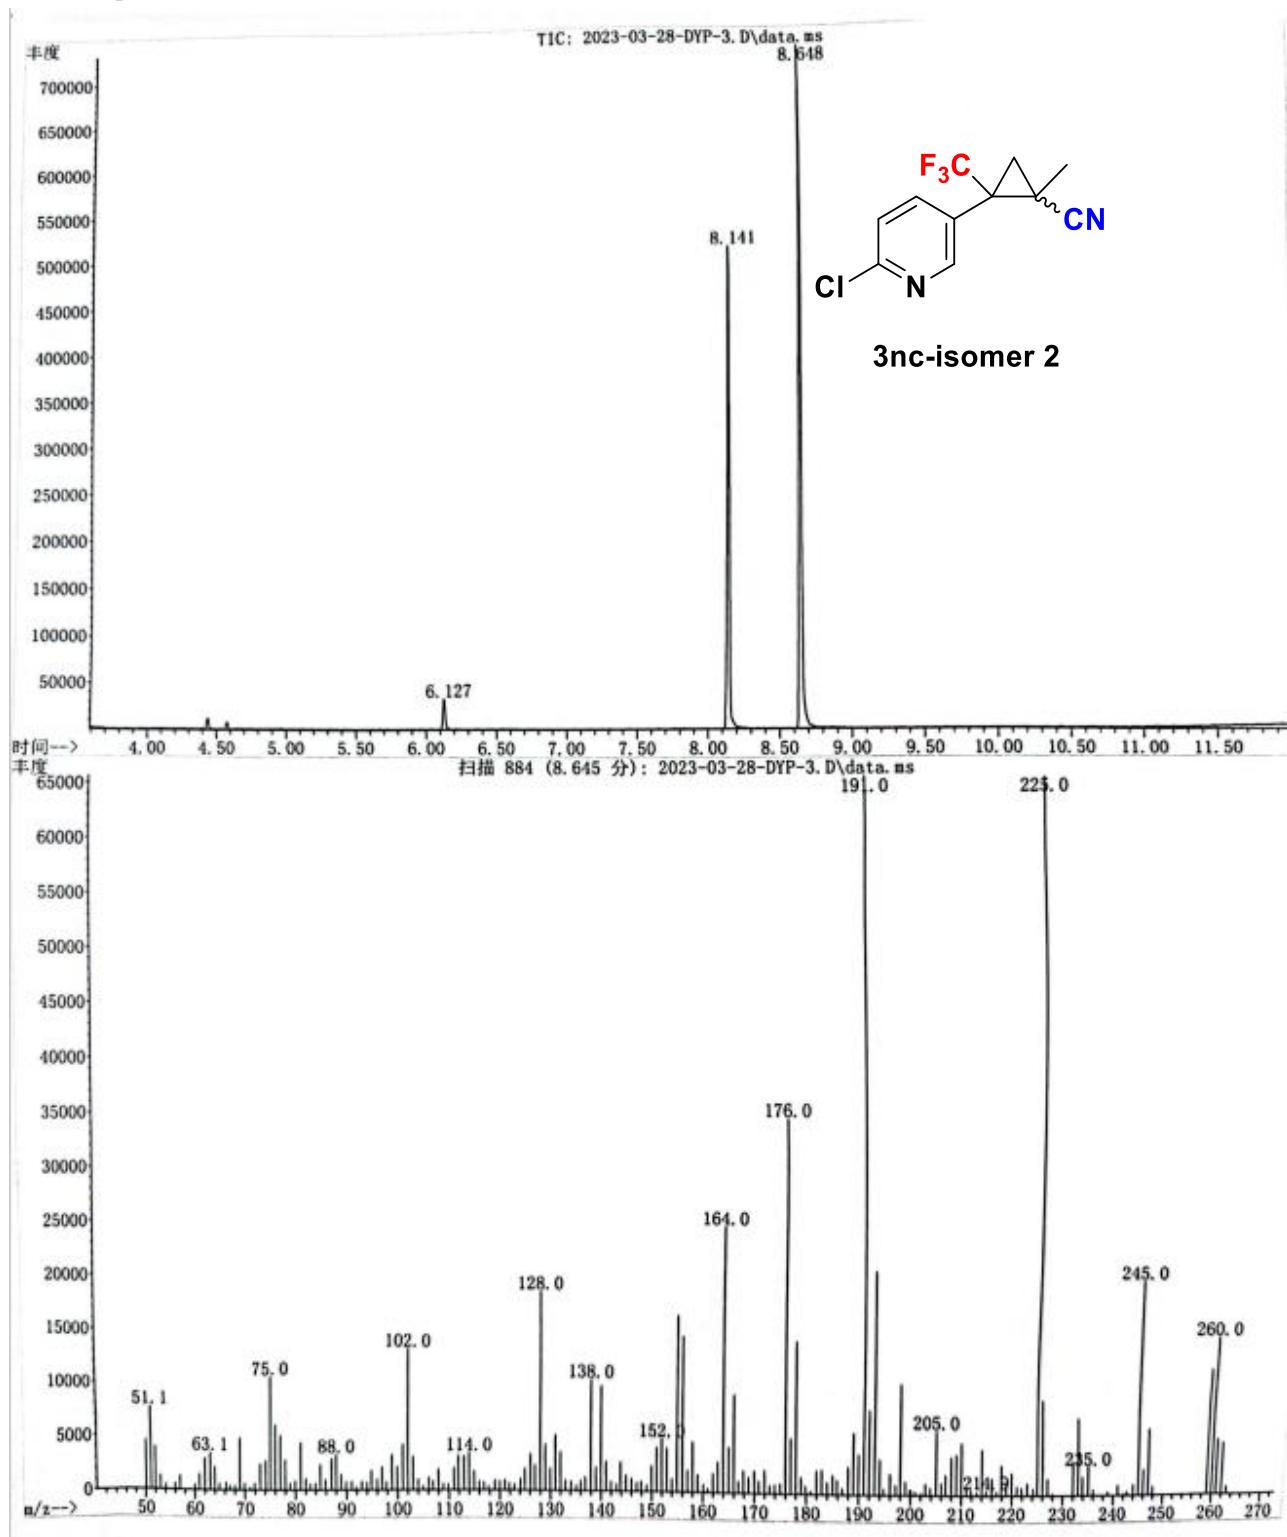

Supplement: d3nj02607h1.pdf [file d3nj02607h1.pdf]
